# Supplementary material for: Clinical expression and antigenic profiles of a Plasmodium vivax vaccine candidate: merozoite surface protein 7 (PvMSP-7)
Source: PubMed Central journal article supplement (PMC6567670; doi:10.1186/s12936-019-2826-7), 2019-06-13
Supplement: 12936_2019_2826_MOESM7_ESM.pdf [file 12936_2019_2826_MOESM7_ESM.pdf]

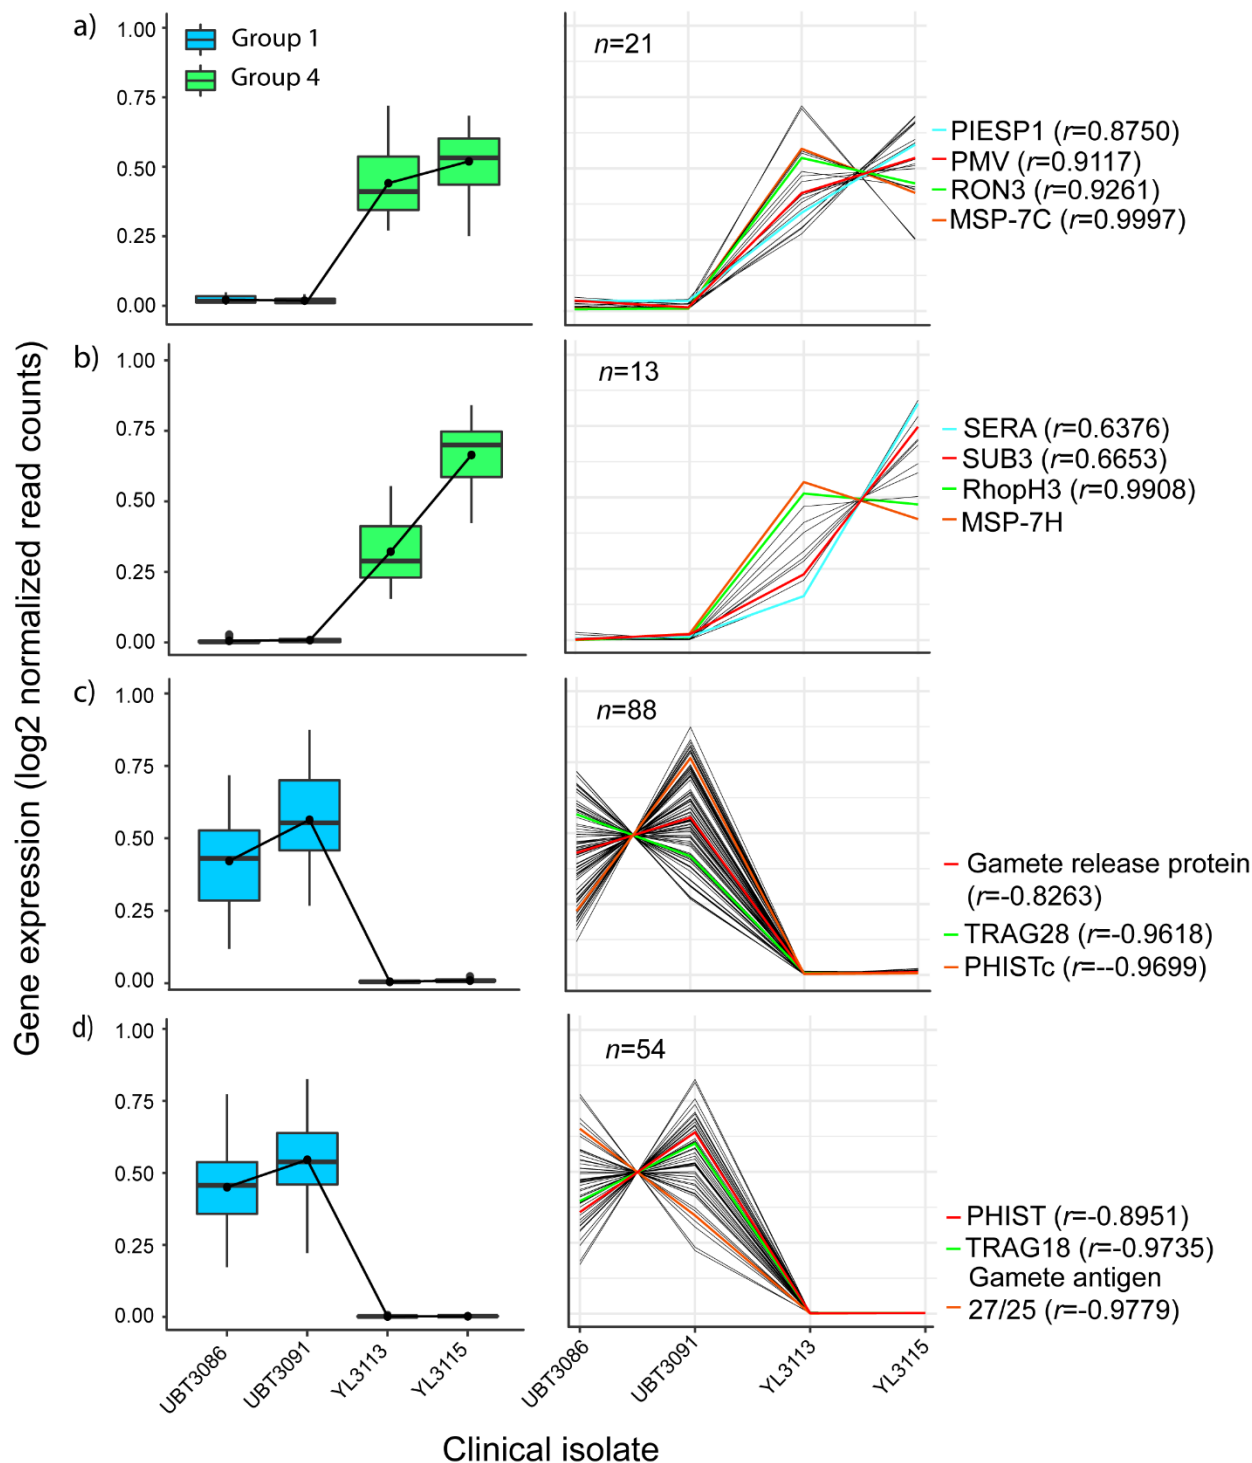

**Additional file 7.** Clusters of genes co-expressed between Patient Groups 1 and 4. Normalised read counts from the *DESeq2* analysis were used to generate clusters of genes with positively correlated transcription profiles using *coseq*. 251 DEGs formed six clusters; four clusters with dynamics that clearly distinguish the two patient groups are shown here. Boxplots (left) represent individual patient, shaded by Patient Group; the black line connecting boxplots is the mean expression value of all genes in the cluster. **a)** MSP-7C is co-expressed with 20 other genes such as PIESP1, PMV, and rhopty neck protein 3 (RON3, PvP01\_1469200). **b)** MSP-7H is co-expressed with 12 other genes including serine-repeat antigen-1 (SERA, PvP01\_0417100), subtilisin-like protease 3 (SUB3, PvP01\_1026800), and high molecular weight rhopty protein 3 (RhopH3, PvP01\_0703800). **c)** A gametocyte-specific marker, gamete release protein (PvP01\_0115300), was co-expressed with TRAG28 and PHISTc, but negatively correlated with PvMSP-7H and other invasion related genes. **d)** Another gametocyte-specific marker, gamete antigen 27/25, was co-expressed with *Plasmodium* exported protein (PHIST, PvP01\_0734900) and tryptophan-rich protein 18 (TRAG18, PvP01\_1033900). The line graphs (right) show the expression pattern of each gene in the cluster across all patients, and specific genes are labelled. Pearson's correlation coefficient ( $r$ ) for abundance values of MSP-7H and these selected genes are shown.
