# Supplementary material for: Clinical expression and antigenic profiles of a Plasmodium vivax vaccine candidate: merozoite surface protein 7 (PvMSP-7)
Source: Malar J. 2019 Jun 13;18:197. doi: 10.1186/s12936-019-2826-7 (PMC6567670; doi:10.1186/s12936-019-2826-7)
Supplement: Supplementary file 3 — Additional file 3. Genes showing significant differential expression in pairwise comparisons of Patient Groups. Results of differential expression tests in pairwise comparisons of Patient Groups 1–4 using DEseq2. Fold-change is log2-transformed. p-value is Bonferroni-corrected for multiple tests. Differentially expressed genes are defined as having an adjusted p value < 0.05 and are shaded red. Significant MSP-7 genes are listed first.Genes showing significant differential expression in pairwise comparisons of Patient Groups. Results of differential expression tests in pairwise comparisons of Patient Groups 1–4 using DEseq2. Fold-change is log2-transformed. p-value is Bonferroni-corrected for multiple tests. Differentially expressed genes are defined as having an adjusted p value < 0.05 and are shaded red. Significant MSP-7 genes are listed first. [file 12936_2019_2826_MOESM3_ESM.xlsx]

## Sheet: 1vs2
Gene ID	Gene Name	Product Description	baseMean	log2FoldChange	lfcSE	stat	pvalue	padj
PVP01_0004260		hypothetical protein	250.297	5.57617	0.891832	6.25249	4.03953e-10	2.09975e-06
PVP01_0900700		PIR protein	99.5232	7.4482	1.23141	6.0485	1.46197e-09	3.79967e-06
PVP01_0720500		dynein intermediate chain, putative	278.115	3.83884	0.684509	5.60817	2.04479e-08	3.54295e-05
PVP01_0923500		dynein heavy chain, putative	1011.7	4.19438	0.769403	5.45147	4.99554e-08	6.4917e-05
PVP01_0623200		Plasmodium exported protein, unknown function	47.4073	4.73246	0.895354	5.28557	1.25314e-07	0.000130276
PVP01_1400800		Plasmodium exported protein, unknown function	18.1845	8.4607	1.65889	5.10023	3.39244e-07	0.000293898
PVP01_1470400		Plasmodium exported protein, unknown function	60.1229	5.30856	1.06226	4.99744	5.80956e-07	0.000377476
PVP01_1232300		conserved Plasmodium protein, unknown function	183.732	3.37768	0.673019	5.01869	5.20243e-07	0.000377476
PVP01_0921200		conserved Plasmodium protein, unknown function	766.299	3.30166	0.671601	4.91611	8.82822e-07	0.000509878
PVP01_0204100		kinesin-8, putative	206.28	2.97753	0.614009	4.84933	1.2388e-06	0.000643931
PVP01_0000120	TRAG27	tryptophan-rich protein	567.226	4.51294	0.940984	4.79598	1.6188e-06	0.000764955
PVP01_0832300		conserved Plasmodium protein, unknown function	595.352	2.9123	0.613454	4.74738	2.06066e-06	0.000892608
PVP01_0838600		PIR protein	88.6765	7.76997	1.6556	4.69314	2.69038e-06	0.000998899
PVP01_0102700		conserved Plasmodium protein, unknown function	202.073	3.7737	0.802727	4.7011	2.58762e-06	0.000998899
PVP01_0415800	P230	6-cysteine protein	1111.36	4.20444	0.899495	4.67422	2.9507e-06	0.00102252
PVP01_1101200		PIR protein, pseudogene	22.4091	5.694	1.22605	4.64418	3.41436e-06	0.00110924
PVP01_0300900		Plasmodium exported protein, unknown function	16.9234	6.70104	1.45276	4.61262	3.97623e-06	0.00121579
PVP01_0502800		PIR protein	17.75	6.71134	1.46292	4.58763	4.4831e-06	0.00122648
PVP01_0905300		WD repeat-containing protein, putative	62.9606	4.42585	0.962409	4.59872	4.25086e-06	0.00122648
PVP01_1471800		Plasmodium exported protein, unknown function	31.3069	5.06917	1.12288	4.51445	6.34821e-06	0.0016499
PVP01_0516200		Plasmodium exported protein (PHIST), unknown function	57.8455	3.99556	0.896742	4.45564	8.36449e-06	0.00207041
PVP01_1335700		conserved Plasmodium protein, unknown function	209.95	3.42244	0.770024	4.44459	8.80588e-06	0.00208059
PVP01_1216400	EF-1gamma	elongation factor 1-gamma, putative	154.449	-3.64087	0.828681	-4.39358	1.11501e-05	0.00251992
PVP01_0832800	ClpP	ATP-dependent Clp protease proteolytic subunit, putative	19.5201	-5.2191	1.20847	-4.31878	1.56897e-05	0.00339813
PVP01_0414100		conserved Plasmodium protein, unknown function	17.3629	-6.6135	1.55193	-4.26147	2.03089e-05	0.00422262
PVP01_1244000	GAPDH	glyceraldehyde-3-phosphate dehydrogenase, putative	2503.67	-2.75114	0.648387	-4.24305	2.20498e-05	0.00440826
PVP01_0525000		Plasmodium exported protein (PHIST), unknown function	18.6064	6.85886	1.62026	4.23318	2.30405e-05	0.00443572
PVP01_0839100		PIR protein	16.5968	6.69505	1.59485	4.19791	2.69389e-05	0.00455676
PVP01_0534200		Plasmodium exported protein, unknown function	18.2562	6.00494	1.43114	4.19593	2.71758e-05	0.00455676
PVP01_0422800		Plasmodium exported protein (PHIST), unknown function	4838.77	4.30043	1.02183	4.20858	2.56982e-05	0.00455676
PVP01_1118700		TPH domain-containing protein, putative	132.85	3.33623	0.794763	4.19776	2.69565e-05	0.00455676
PVP01_0005740		PIR protein	11.1726	5.11517	1.23099	4.15532	3.24833e-05	0.00475345
PVP01_1470200		Plasmodium exported protein, unknown function	1544.31	4.90056	1.17622	4.16637	3.09491e-05	0.00475345
PVP01_0519000		conserved Plasmodium protein, unknown function	298.308	3.19281	0.764749	4.17498	2.98007e-05	0.00475345
PVP01_1206000		E1-E2 ATPase, putative	277.029	3.0394	0.731305	4.15614	3.23671e-05	0.00475345
PVP01_0516100		Plasmodium exported protein (PHIST), unknown function	175.609	2.86082	0.68898	4.15226	3.29211e-05	0.00475345
PVP01_0422900		Plasmodium exported protein, unknown function	41.6071	3.9679	0.967711	4.1003	4.12624e-05	0.00564426
PVP01_0527000		conserved Plasmodium protein, unknown function	86.0239	3.4628	0.843437	4.10559	4.03287e-05	0.00564426
PVP01_0624000		Plasmodium exported protein, unknown function	215.751	3.22283	0.787767	4.0911	4.29333e-05	0.00572224
PVP01_0005750		PIR protein, pseudogene	21.6878	6.15359	1.51246	4.06859	4.72978e-05	0.00614636
PVP01_0728800	MSP1P	merozoite surface protein 1 paralog	111.058	3.32721	0.820772	4.05375	5.04026e-05	0.0063707
PVP01_1114000		pyrroline-5-carboxylate reductase, putative	33.8134	-5.25569	1.29808	-4.04882	5.14755e-05	0.0063707
PVP01_0623400		Plasmodium exported protein, unknown function	42.3333	3.74767	0.931255	4.02432	5.71393e-05	0.00690721
PVP01_0420200	COQ5	2-methoxy-6-polyprenyl-1,4-benzoquinol methylase, mitochondrial, putative	62.9602	2.90425	0.724751	4.00723	6.14345e-05	0.00712945
PVP01_0948800	TRAG16	tryptophan-rich protein	805.514	4.40832	1.10105	4.00373	6.23514e-05	0.00712945
PVP01_1408300		conserved Plasmodium protein, unknown function	60.9665	3.15431	0.788392	4.00094	6.30925e-05	0.00712945
PVP01_1470100	TRAG24	tryptophan-rich protein	102.75	4.28125	1.07833	3.97027	7.17917e-05	0.00793985
PVP01_0914700	MAPK2	mitogen-activated protein kinase 2, putative	140.51	3.32493	0.843621	3.94126	8.10546e-05	0.00838435
PVP01_0404800		Plasmodium exported protein, unknown function	82.2252	4.78982	1.2164	3.93771	8.22627e-05	0.00838435
PVP01_1241000		dynein beta chain, putative	194.106	3.14112	0.797368	3.93937	8.16963e-05	0.00838435
PVP01_1127700		nascent polypeptide-associated complex subunit alpha, putative	130.317	-3.00685	0.763123	-3.94018	8.14189e-05	0.00838435
PVP01_0514500		conserved Plasmodium protein, unknown function	202.931	3.43744	0.874259	3.93183	8.43007e-05	0.00842683
PVP01_0502400		PIR protein	12.8938	6.37419	1.63382	3.9014	9.56388e-05	0.00937982
PVP01_1456100		COPI associated protein, putative	24.8379	3.73476	0.95996	3.89054	0.000100023	0.00962815
PVP01_0408100		conserved Plasmodium protein, unknown function	112.111	2.61389	0.673335	3.882	0.0001036	0.00979117
PVP01_1446500	NEK1	NIMA related kinase 1, putative	127.418	2.69211	0.694467	3.87652	0.000105962	0.00983555
PVP01_1262900		conserved Plasmodium protein, unknown function	302.415	2.47481	0.639914	3.8674	0.000110001	0.0100313
PVP01_0307500		conserved Plasmodium protein, unknown function	168.601	3.13993	0.823106	3.81473	0.000136332	0.0122182
PVP01_1306000		conserved Plasmodium protein, unknown function	80.2692	2.89352	0.761842	3.79806	0.000145832	0.012848
PVP01_1139400		conserved Plasmodium protein, unknown function	85.4661	3.67557	0.969736	3.79028	0.000150477	0.0130363
PVP01_0404900		Plasmodium exported protein, unknown function	78.9688	3.0046	0.794939	3.77967	0.000157039	0.0131836
PVP01_0905200		thioredoxin, putative	136.017	-2.74571	0.726505	-3.77933	0.000157249	0.0131836
PVP01_1227900		conserved Plasmodium protein, unknown function	149.415	2.77607	0.736851	3.76748	0.000164905	0.013606
PVP01_0838700		PIR protein	23.8144	8.83652	2.35524	3.75186	0.000175529	0.0136777
PVP01_1470300		Plasmodium exported protein (PHIST), unknown function	62.2358	4.79976	1.28222	3.74333	0.0001816	0.0136777
PVP01_0703700		dynein heavy chain, putative	873.75	4.07056	1.08845	3.73976	0.000184194	0.0136777
PVP01_1434600		conserved Plasmodium protein, unknown function	30.6225	3.18179	0.848548	3.74969	0.000177055	0.0136777
PVP01_0420800		conserved Plasmodium protein, unknown function	95.0709	3.10958	0.826706	3.76141	0.000168958	0.0136777
PVP01_0814600		conserved Plasmodium protein, unknown function	359.218	2.74822	0.732861	3.74999	0.000176839	0.0136777
PVP01_0313800		dynein heavy chain, putative	416.296	2.71319	0.724248	3.74622	0.000179518	0.0136777
PVP01_1318600		conserved Plasmodium protein, unknown function	49.4875	2.92402	0.785262	3.72362	0.000196384	0.0143775
PVP01_0409200	ORC5	origin recognition complex subunit 5, putative	69.2877	2.55993	0.690921	3.70509	0.000211314	0.0149322
PVP01_0829800	PIESP1	parasite-infected erythrocyte surface protein, putative	81.7919	-3.35708	0.906443	-3.70358	0.000212578	0.0149322
PVP01_0530800		alpha tubulin 2, putative	1096.91	3.29269	0.887804	3.7088	0.000208241	0.0149322
PVP01_0518400	AK2	adenylate kinase 2, putative	35.5357	3.58504	0.972317	3.6871	0.00022682	0.0153147
PVP01_0201400		PIR protein	58.7785	3.27026	0.886958	3.68706	0.000226863	0.0153147
PVP01_0119100		28S ribosomal RNA	540.355	-4.45136	1.20587	-3.69142	0.000223005	0.0153147
PVP01_0423600		Plasmodium exported protein (PHIST), unknown function	42.5239	5.28374	1.43618	3.67901	0.00023414	0.0156033
PVP01_1318300		conserved Plasmodium protein, unknown function	109.26	3.28231	0.895038	3.66723	0.000245192	0.016133
PVP01_0404700		Plasmodium exported protein, unknown function	27.7771	4.8659	1.32809	3.66382	0.000248479	0.0161449
PVP01_1017900		RAP protein, putative	61.8812	-3.95954	1.08601	-3.64595	0.000266409	0.0170962
PVP01_1306900		conserved Plasmodium protein, unknown function	156.953	3.05238	0.844307	3.61525	0.000300059	0.0190208
PVP01_0908400		conserved Plasmodium protein, unknown function	87.5051	2.67011	0.741368	3.6016	0.000316268	0.0198067
PVP01_0419900		conserved Plasmodium protein, unknown function	52.6348	4.01448	1.12084	3.58166	0.000341418	0.0207006
PVP01_1248200		exonuclease V, mitochondrial, putative	71.7268	2.9675	0.828535	3.58163	0.00034146	0.0207006
PVP01_0829000		valine--tRNA ligase, putative	106.869	-3.20474	0.894968	-3.58084	0.000342488	0.0207006
PVP01_1148100		PIR protein	4.21763	6.28131	1.77099	3.54677	0.00038998	0.0232168
PVP01_1123000		conserved Plasmodium protein, unknown function	79.2039	2.91435	0.822169	3.54471	0.000393051	0.0232168
PVP01_0202100		Plasmodium exported protein, unknown function	119.374	2.34368	0.66394	3.52995	0.000415641	0.0242753
PVP01_0000130	TRAG28	tryptophan-rich protein	1583.53	2.63657	0.75271	3.50277	0.000460452	0.0260155
PVP01_1323000		dynein intermediate chain, putative	286.099	2.97361	0.848268	3.5055	0.000455744	0.0260155
PVP01_0608300		dynein heavy chain, putative	1525.86	2.41084	0.688257	3.50283	0.000460351	0.0260155
PVP01_0415900	P230p	transmission-blocking target antigen s230 paralog, putative	258.564	2.54068	0.72674	3.49599	0.000472299	0.026398
PVP01_0610700		conserved Plasmodium protein, unknown function	1259.18	2.37432	0.679803	3.49265	0.000478246	0.026446
PVP01_0947400		conserved Plasmodium protein, unknown function	215.959	2.48963	0.717528	3.46973	0.000520982	0.0285059
PVP01_0003290		PIR protein	7.2592	7.02124	2.02598	3.4656	0.000529057	0.0286462
PVP01_1344200	ACalpha	adenylyl cyclase alpha, putative	101.566	2.71824	0.787207	3.45302	0.000554351	0.0297063
PVP01_0000210		tryptophan-rich protein	63.599	6.1795	1.79323	3.44601	0.000568926	0.0301763
PVP01_1322600	PEPC	phosphoenolpyruvate carboxylase, putative	40.8653	-3.89417	1.13125	-3.44235	0.000576682	0.0302787
PVP01_1445700	SOC2	protein SOC2, putative	406.3	2.29541	0.669354	3.4293	0.00060515	0.0312774
PVP01_1229400		lactate dehydrogenase, putative	251.73	3.20109	0.933771	3.42814	0.000607738	0.0312774
PVP01_0903400		hypothetical protein	6.53919	5.22521	1.52581	3.42454	0.000615838	0.0313836
PVP01_0814300	HAP2	male gamete fusion factor HAP2, putative	20.4657	3.1316	0.918479	3.40955	0.000650693	0.032586
PVP01_1469800	TRAG22	tryptophan-rich protein	177.435	2.40197	0.704594	3.40902	0.000651971	0.032586
PVP01_1450100		conserved Plasmodium protein, unknown function	86.0862	-2.46829	0.725194	-3.40362	0.000664985	0.0329199
PVP01_0808800		Plasmodium exported protein (PHIST), unknown function	76.2406	3.6518	1.07513	3.3966	0.000682279	0.0334574
PVP01_1461900		cytoplasmic translation machinery associated protein, putative	42.7292	-3.15306	0.929353	-3.39275	0.000691952	0.0336146
PVP01_1302300	ORC1	origin recognition complex subunit 1, putative	232.829	2.81606	0.830677	3.39008	0.000698719	0.0336291
PVP01_1015200	PUF1	mRNA-binding protein PUF1, putative	185.555	2.61683	0.772514	3.38742	0.000705532	0.0336455
PVP01_0004350		PIR protein	15.9382	4.40009	1.30686	3.36693	0.000760109	0.0359186
PVP01_0927300		steryl ester hydrolase, putative	277.662	2.62323	0.779895	3.36357	0.000769425	0.0360313
PVP01_1302800	SUA5	threonylcarbamoyl-AMP synthase, putative	106.018	-2.47418	0.736658	-3.35866	0.000783221	0.0363498
PVP01_0800400		Plasmodium exported protein, unknown function	41.8326	3.09204	0.922604	3.35142	0.00080397	0.0369298
PVP01_1114600		dynein light chain, putative	18.2945	2.7983	0.835469	3.34938	0.000809926	0.0369298
PVP01_0005450		Plasmodium exported protein, unknown function	8.2473	7.23059	2.16763	3.33571	0.00085083	0.038126
PVP01_1113400		zinc finger protein, putative	23.1626	-3.93019	1.17769	-3.33719	0.000846312	0.038126
PVP01_0106900	MSH2-2	DNA mismatch repair protein MSH2, putative	36.5062	2.989	0.901102	3.31705	0.000909741	0.0400749
PVP01_1228300		TBC domain containing protein	90.1777	2.46483	0.742871	3.31798	0.000906717	0.0400749
PVP01_0526400		conserved Plasmodium protein, unknown function	365.16	4.34773	1.31283	3.31173	0.000927222	0.0403485
PVP01_0102500		Plasmodium exported protein (PHIST), unknown function, pseudogene	369.507	2.61779	0.791322	3.30812	0.000939239	0.0403485
PVP01_1451400		conserved Plasmodium protein, unknown function	132.453	2.36791	0.715376	3.31003	0.000932873	0.0403485
PVP01_0113100	RAB18	ras-related protein Rab-18, putative	66.3978	-2.99439	0.909982	-3.2906	0.000999736	0.0416498
PVP01_1327600		conserved Plasmodium protein, unknown function	66.6079	3.04737	0.925004	3.29444	0.000986182	0.0416498
PVP01_0935700		conserved Plasmodium protein, unknown function	89.3302	2.93201	0.889564	3.29601	0.000980695	0.0416498
PVP01_1407400		MORN repeat protein, putative	94.3427	2.77842	0.844483	3.29008	0.00100158	0.0416498
PVP01_0000150	TRAG30	tryptophan-rich protein	90.2605	-3.65801	1.1202	-3.26549	0.00109274	0.04508
PVP01_0814900		conserved Plasmodium protein, unknown function	56.0176	2.58419	0.793764	3.25561	0.00113149	0.0463109
PVP01_0010030		Plasmodium exported protein, unknown function	13.233	4.11428	1.26598	3.24988	0.00115455	0.0468856
PVP01_1304700		tetratricopeptide repeat protein, putative	712.366	2.65698	0.818411	3.24651	0.00116831	0.0470765
PVP01_1268400		conserved Plasmodium protein, unknown function	13.0756	-3.86261	1.19313	-3.23738	0.00120633	0.0482347
PVP01_1016600	FACT-L	FACT complex subunit SPT16, putative	899.432	2.0872	0.646244	3.22974	0.00123902	0.0484244
PVP01_1140300		conserved Plasmodium protein, unknown function	325.462	2.66164	0.82346	3.23227	0.00122812	0.0484244
PVP01_1240900		40S ribosomal protein S3, putative	207.542	-2.38224	0.737158	-3.23165	0.00123078	0.0484244
PVP01_1140100	OAT	ornithine aminotransferase, putative	123.368	-2.7666	0.858198	-3.22374	0.0012653	0.0487189
PVP01_0000060		Plasmodium exported protein, unknown function	19.177	3.56742	1.10605	3.22537	0.0012581	0.0487189
PVP01_0414700			509.534	1.87019	0.582679	3.20964	0.00132899	0.050424
PVP01_0916100			284.986	-2.31067	0.719544	-3.2113	0.00132135	0.050424
PVP01_1400100			4.5874	6.2843	1.96681	3.19518	0.00139745	0.0526372
PVP01_1469600			32.0619	4.14631	1.30165	3.18541	0.00144547	0.0540545
PVP01_1114900			274.026	-2.28552	0.721715	-3.16679	0.00154134	0.0572277
PVP01_0320400			166.985	-2.18597	0.69217	-3.15814	0.00158779	0.0585342
PVP01_1271600			559.081	2.50929	0.795634	3.15382	0.00161147	0.0589888
PVP01_1406900			5.87695	-5.00825	1.59704	-3.13595	0.00171299	0.0622666
PVP01_1257600			15.5171	-4.86581	1.55366	-3.13183	0.00173719	0.0627078
PVP01_0712300			50.4355	-2.74175	0.876191	-3.12917	0.001753	0.0628421
PVP01_1271100			8.32664	-4.58709	1.4671	-3.12663	0.00176823	0.0629537
PVP01_1436400			14.132	4.9829	1.59965	3.11498	0.00183954	0.0634345
PVP01_0950000			24.8778	4.00537	1.28605	3.11447	0.00184275	0.0634345
PVP01_0723500			11.7449	3.27565	1.05168	3.11467	0.00184149	0.0634345
PVP01_1344600			27.2573	2.9805	0.954584	3.1223	0.00179445	0.0634345
PVP01_0109600			176.806	-2.37088	0.760935	-3.11575	0.00183475	0.0634345
PVP01_0004300			6.82476	3.73823	1.20439	3.10382	0.00191038	0.0653301
PVP01_0949700			19.775	5.14881	1.67691	3.07042	0.00213761	0.0661105
PVP01_0119300			11.8026	4.60648	1.49415	3.08301	0.00204922	0.0661105
PVP01_1244300			48.1054	4.06201	1.31678	3.08479	0.00203694	0.0661105
PVP01_0947300			21.752	3.60524	1.16763	3.08766	0.00201741	0.0661105
PVP01_1471500			30.105	3.30753	1.07705	3.07091	0.0021341	0.0661105
PVP01_0000190			50.0121	3.07259	0.9937	3.09207	0.00198765	0.0661105
PVP01_0948400			23.2049	2.80926	0.914314	3.07253	0.00212249	0.0661105
PVP01_0928400			41.7585	2.79587	0.904825	3.08995	0.00200189	0.0661105
PVP01_0817600			151.082	2.43493	0.794364	3.06525	0.00217485	0.0661105
PVP01_0413100			116.862	-2.40685	0.783703	-3.07113	0.00213254	0.0661105
PVP01_0827100			100.562	-2.41161	0.784498	-3.07409	0.00211149	0.0661105
PVP01_0924200			90.9747	-2.53361	0.823512	-3.07659	0.00209381	0.0661105
PVP01_0211800			146.489	-3.02525	0.98492	-3.07156	0.00212941	0.0661105
PVP01_1334100			23.5308	-3.46139	1.12774	-3.06932	0.00214549	0.0661105
PVP01_1148600			17.3357	-3.80682	1.24106	-3.0674	0.00215927	0.0661105
PVP01_1017700			57.9815	-3.81064	1.24262	-3.06661	0.00216501	0.0661105
PVP01_0523200			5.79162	-5.01202	1.62173	-3.09054	0.00199791	0.0661105
PVP01_0936200			6.00309	-5.03482	1.63048	-3.08794	0.00201551	0.0661105
PVP01_0620400			38.9476	-5.06302	1.64935	-3.06971	0.00214269	0.0661105
PVP01_1147100			62.2063	4.02175	1.31943	3.0481	0.00230292	0.0695962
PVP01_0300600			66.2579	4.17703	1.37202	3.04443	0.00233122	0.0700445
PVP01_0532900			481.372	2.46616	0.811849	3.03771	0.00238386	0.0712144
PVP01_0424000			9.73937	4.38706	1.44778	3.0302	0.00244392	0.0717888
PVP01_0533000			192.888	2.91319	0.96141	3.03013	0.00244452	0.0717888
PVP01_0203900			239.613	2.06242	0.679967	3.03312	0.00242038	0.0717888
PVP01_0839000			8.97556	6.58456	2.1744	3.02822	0.00245999	0.0718373
PVP01_1130000			232.606	-2.45857	0.81607	-3.0127	0.00258939	0.0751935
PVP01_1208500			123.519	2.49674	0.829423	3.01021	0.00261066	0.07539
PVP01_0010380			8.51669	6.48727	2.16035	3.00289	0.00267433	0.075955
PVP01_0821700			105.92	2.12134	0.706649	3.00197	0.00268235	0.075955
PVP01_1008300			81.2792	-2.70902	0.902113	-3.00297	0.00267362	0.075955
PVP01_1220200			16.3	-5.46424	1.82065	-3.00126	0.00268867	0.075955
PVP01_0936500			225.148	2.21656	0.739606	2.99694	0.00272701	0.0762095
PVP01_0830800			11.6153	-4.42004	1.4742	-2.99827	0.00271515	0.0762095
PVP01_0524900			65.2349	5.84697	1.95304	2.99378	0.00275549	0.0765938
PVP01_0000100			344.264	2.69883	0.904676	2.9832	0.00285255	0.0780613
PVP01_1434500			27.5013	2.38743	0.800346	2.983	0.00285434	0.0780613
PVP01_1211800			239.821	-2.06886	0.693898	-2.9815	0.00286836	0.0780613
PVP01_0320100			8.20478	-4.48634	1.50326	-2.98441	0.00284129	0.0780613
PVP01_1148700			11.0013	3.69431	1.24039	2.97835	0.00289804	0.0784583
PVP01_1026600			13.1658	3.42437	1.15202	2.97249	0.00295396	0.0788189
PVP01_0810500			55.9424	2.79207	0.940376	2.96911	0.00298668	0.0788189
PVP01_0711000			66.2938	2.74875	0.925798	2.96905	0.00298717	0.0788189
PVP01_0812500			125.786	-3.04529	1.02509	-2.97077	0.00297059	0.0788189
PVP01_0929300			43.5051	-3.21493	1.08131	-2.97318	0.00294729	0.0788189
PVP01_0419500			83.0146	2.21315	0.746696	2.96393	0.00303739	0.0797393
PVP01_1030800			119.682	1.8795	0.635304	2.95843	0.00309212	0.0807679
PVP01_0503800			2577.95	3.02401	1.02524	2.94957	0.00318218	0.082705
PVP01_1336700			44.8511	3.6604	1.24383	2.94284	0.00325213	0.0841024
PVP01_0002330			9.32732	6.42779	2.18702	2.93906	0.00329205	0.0847131
PVP01_0931600			22.8099	2.64977	0.902993	2.93443	0.00334158	0.084896
PVP01_0805800			27.0205	2.46112	0.838249	2.93602	0.00332451	0.084896
PVP01_1414200			9.24755	-3.67746	1.25347	-2.93382	0.00334815	0.084896
PVP01_1252300			99.7197	-2.30215	0.785783	-2.92975	0.0033923	0.0855979
PVP01_1145500			177.038	-2.02234	0.690795	-2.92756	0.00341636	0.0857887
PVP01_1452900			157.731	-2.31995	0.793469	-2.92381	0.00345773	0.0864099
PVP01_0701000			35.2266	3.26459	1.12401	2.90442	0.00367933	0.0915079
PVP01_0832400			22.3379	-3.26822	1.12611	-2.90223	0.00370513	0.0917107
PVP01_1240600			202.968	2.84579	0.981439	2.89961	0.00373628	0.0920434
PVP01_0727900			206.088	-3.4235	1.18184	-2.89675	0.00377056	0.0924497
PVP01_0404500			698.632	4.35475	1.50552	2.89252	0.00382163	0.092901
PVP01_0010870			5.3296	-4.92034	1.7012	-2.89227	0.0038247	0.092901
PVP01_1143300			234.24	2.509	0.869133	2.88679	0.00389199	0.0940957
PVP01_0801200			214.339	2.6027	0.904835	2.87643	0.00402198	0.0963646
PVP01_1410700			64.9504	-2.26195	0.786394	-2.87636	0.00402292	0.0963646
PVP01_0000960			7.86084	7.18514	2.50468	2.86868	0.00412184	0.0970163
PVP01_0828000			157.925	2.69136	0.937532	2.87069	0.00409578	0.0970163
PVP01_1258800			341.056	2.0865	0.727393	2.86846	0.00412478	0.0970163
PVP01_1222100			39.0219	-2.44587	0.852325	-2.86965	0.00410929	0.0970163
PVP01_0905400			22.2343	2.67503	0.938917	2.84905	0.00438495	0.0986709
PVP01_1033600			2593.42	2.20857	0.774226	2.85261	0.00433612	0.0986709
PVP01_0204400			447.658	1.9731	0.691971	2.85142	0.00435249	0.0986709
PVP01_1321000			140.044	-2.07105	0.726706	-2.84992	0.00437307	0.0986709
PVP01_0614700			132.242	-2.47434	0.866385	-2.85594	0.00429093	0.0986709
PVP01_0416200			30.8789	-2.77838	0.973759	-2.85325	0.00432748	0.0986709
PVP01_0809400			9.7437	-3.406	1.19335	-2.85415	0.00431527	0.0986709
PVP01_1414900			18.8282	-3.96522	1.38714	-2.85857	0.00425558	0.0986709
PVP01_1136400			15.6757	-4.16966	1.4582	-2.85945	0.00424379	0.0986709
PVP01_1107900			11.8918	-5.93074	2.07983	-2.85156	0.00435055	0.0986709
PVP01_1018100			15.171	-3.22653	1.13718	-2.8373	0.00454968	0.101936
PVP01_0824400			160.075	2.04964	0.722973	2.83502	0.00458234	0.102228
PVP01_0824800			224.112	2.11381	0.745998	2.83353	0.00460375	0.102266
PVP01_1104700			72.9912	2.85087	1.00745	2.8298	0.00465776	0.103026
PVP01_0831600			78.516	-2.60451	0.921265	-2.8271	0.00469714	0.103456
PVP01_0528400			60.1618	2.99541	1.06004	2.82574	0.00471709	0.103458
PVP01_0941200			101.795	2.42021	0.858089	2.82047	0.00479541	0.104733
PVP01_0010570			39.2926	4.34968	1.54457	2.8161	0.004861	0.105281
PVP01_0945000			176.414	-1.83069	0.649774	-2.81742	0.00484112	0.105281
PVP01_0424200			11.9804	2.57237	0.915335	2.8103	0.00494953	0.106754
PVP01_0706100			69.5886	-2.05003	0.730474	-2.80644	0.00500919	0.107476
PVP01_1437400			34.9479	-4.3006	1.53293	-2.80547	0.00502437	0.107476
PVP01_1469300			305.15	2.80943	1.00246	2.80253	0.00507033	0.107574
PVP01_1013000			186.266	-2.05898	0.734651	-2.80266	0.00506833	0.107574
PVP01_0010230			3.05826	5.60591	2.0072	2.7929	0.00522383	0.107928
PVP01_1471600			51.3488	3.87514	1.38804	2.79181	0.00524141	0.107928
PVP01_1269100			46.745	2.56538	0.917545	2.79592	0.0051752	0.107928
PVP01_1470700			318.925	2.50007	0.895435	2.79202	0.005238	0.107928
PVP01_1025600			93.8235	2.29497	0.823749	2.78601	0.00533618	0.107928
PVP01_0838200			129.972	2.21049	0.791276	2.79358	0.00521288	0.107928
PVP01_0923400			69.875	1.93114	0.69292	2.78697	0.00532041	0.107928
PVP01_0312200			66.6637	-2.18869	0.781881	-2.79927	0.00512187	0.107928
PVP01_0731400			54.5903	-2.89004	1.03589	-2.7899	0.00527244	0.107928
PVP01_1465900			9.47278	-3.36204	1.20587	-2.78807	0.00530229	0.107928
PVP01_1031300			4.42003	-4.6662	1.66956	-2.79487	0.00519205	0.107928
PVP01_0202800			145.576	-4.73219	1.69819	-2.7866	0.00532642	0.107928
PVP01_0949800			14.9642	3.28624	1.1815	2.78142	0.0054122	0.108582
PVP01_0801700			252.052	2.88113	1.03703	2.77826	0.00546515	0.108582
PVP01_1130700			87.5166	-1.99208	0.716362	-2.78083	0.00542198	0.108582
PVP01_1445300			103.289	-2.31748	0.834289	-2.77779	0.00547298	0.108582
PVP01_0731000			91.7817	-2.80026	1.00741	-2.77967	0.0054414	0.108582
PVP01_1306100			212.284	1.85377	0.669541	2.76872	0.00562769	0.110942
PVP01_1114500			207.808	1.8355	0.663038	2.76832	0.00563459	0.110942
PVP01_1345600			222.458	3.15551	1.14268	2.76149	0.00575374	0.11286
PVP01_1409400			168.902	-1.97268	0.714997	-2.759	0.0057978	0.113297
PVP01_1467200			3558	2.56165	0.929392	2.75626	0.0058466	0.113823
PVP01_1447500			109.549	-2.39448	0.869789	-2.75295	0.00590611	0.114552
PVP01_1319600			235.436	-2.10884	0.768654	-2.74355	0.00607782	0.117009
PVP01_0000170			245.092	-2.70026	0.983896	-2.74445	0.00606122	0.117009
PVP01_0618000			210.919	-2.13317	0.77811	-2.74147	0.00611646	0.117319
PVP01_1145200			5.16183	-4.80058	1.75532	-2.73488	0.00624027	0.119253
PVP01_1033200			48.8303	1.82898	0.669152	2.73328	0.00627065	0.119395
PVP01_0839400			10.9526	4.68191	1.71504	2.72992	0.00633496	0.120179
PVP01_1401700			214.21	2.21016	0.811176	2.72464	0.00643721	0.121234
PVP01_0818200			275.317	-1.93586	0.710207	-2.72577	0.00641509	0.121234
PVP01_0932200			130.111	-2.71501	0.997205	-2.72262	0.00647656	0.121535
PVP01_1412100			135.263	3.98643	1.46559	2.72002	0.00652778	0.121911
PVP01_1225300			24.4448	2.9871	1.09851	2.71923	0.00654349	0.121911
PVP01_0420600			16.6005	-3.40125	1.25195	-2.71677	0.00659217	0.122379
PVP01_0623500			875.839	2.33559	0.860619	2.71385	0.00665071	0.123026
PVP01_1263700			4.78645	-4.7354	1.74572	-2.71257	0.00667629	0.123062
PVP01_1406400			30.334	-3.72302	1.37511	-2.70743	0.00678057	0.124542
PVP01_0948700			2306.3	1.75031	0.648948	2.69716	0.00699347	0.127551
PVP01_0522100			19.5833	-3.07586	1.13997	-2.69819	0.00697178	0.127551
PVP01_1204900			18.3462	2.75461	1.02238	2.6943	0.00705366	0.128199
PVP01_0207800			220.827	1.82776	0.679644	2.68929	0.00716038	0.129685
PVP01_1433900			45.289	2.52365	0.94021	2.68413	0.00727187	0.131247
PVP01_0701500			25.4379	2.5932	0.967165	2.68124	0.00733502	0.131474
PVP01_0404400			21.2453	2.53418	0.945	2.68167	0.00732551	0.131474
PVP01_1453900			124.403	2.5845	0.96498	2.67829	0.00739993	0.132182
PVP01_0532700			200.835	1.77843	0.664551	2.67614	0.0074476	0.132577
PVP01_1228600			74.8298	2.04248	0.763895	2.67377	0.00750032	0.132622
PVP01_0820600			76.645	-2.58768	0.967814	-2.67374	0.00750111	0.132622
PVP01_0608900			45.3265	3.14302	1.17659	2.67129	0.0075561	0.133141
PVP01_1444200			34.2041	-3.22246	1.20831	-2.66693	0.00765487	0.133973
PVP01_1432500			7.626	-3.7999	1.42457	-2.66741	0.00764392	0.133973
PVP01_0902300			42.6106	5.81694	2.18386	2.6636	0.00773086	0.134054
PVP01_0800900			29.9534	3.59584	1.34971	2.66416	0.00771818	0.134054
PVP01_0422700			161.78	2.61525	0.981943	2.66334	0.00773688	0.134054
PVP01_1009800			34.2139	-2.93515	1.10312	-2.66076	0.00779641	0.134637
PVP01_0007300			3.49276	5.31936	2.00649	2.65108	0.00802352	0.1381
PVP01_0417600			118.308	-4.41897	1.66776	-2.64965	0.0080575	0.138227
PVP01_0301600			3.41058	5.31254	2.00695	2.64707	0.00811917	0.138438
PVP01_1305700			78.92	-2.04078	0.771005	-2.64691	0.00812304	0.138438
PVP01_0503700			7.77601	-5.33529	2.01961	-2.64174	0.00824819	0.140111
PVP01_1312800			52.4202	-2.36337	0.895394	-2.63948	0.00830344	0.14059
PVP01_0320300			139.863	2.00122	0.7602	2.63249	0.00847608	0.143048
PVP01_0622700			21.5022	2.54376	0.966713	2.63135	0.00850455	0.143064
PVP01_1261900			74.7579	-2.16074	0.82202	-2.62857	0.00857436	0.143773
PVP01_0300100			2.90368	5.50606	2.09742	2.62516	0.00866093	0.144293
PVP01_0833500			29.063	-2.79647	1.06486	-2.62614	0.00863594	0.144293
PVP01_0716200			33.1207	-2.09522	0.799541	-2.62053	0.0087792	0.145796
PVP01_0922400			55.5806	3.08945	1.18092	2.61614	0.00889299	0.146748
PVP01_0833200			282.127	-1.85188	0.707599	-2.61713	0.00886713	0.146748
PVP01_0201100			555.697	3.33714	1.2773	2.61264	0.00898451	0.147323
PVP01_1104300			148.323	-2.19172	0.838869	-2.61271	0.00898273	0.147323
PVP01_0314900			214.334	1.98488	0.760759	2.60908	0.00907858	0.14821
PVP01_0617100			46.3859	-2.1537	0.825667	-2.60844	0.0090956	0.14821
PVP01_0410800			273.289	-2.14492	0.824819	-2.60047	0.00930959	0.150752
PVP01_1022100			62.4615	-2.92946	1.12623	-2.60111	0.00929219	0.150752
PVP01_0202700			286.847	-3.76519	1.44888	-2.59869	0.00935802	0.151065
PVP01_0533100			185.331	3.1042	1.1977	2.5918	0.00954758	0.152753
PVP01_0803300			79.3103	-2.43827	0.940604	-2.59223	0.00953548	0.152753
PVP01_1461100			30.0832	-2.80407	1.08195	-2.59168	0.00955074	0.152753
PVP01_0312300			90.3864	-2.04172	0.788226	-2.59027	0.00958995	0.15291
PVP01_1009400			9.36171	-3.3619	1.29848	-2.58911	0.00962244	0.152959
PVP01_1031800			103.962	2.39361	0.927122	2.58176	0.0098297	0.155777
PVP01_1448700			30.6983	-2.84596	1.10288	-2.58049	0.00986594	0.155876
PVP01_1345500			10.9524	2.668	1.03487	2.57811	0.00993416	0.156016
PVP01_0524200			59.7038	1.99924	0.775474	2.57809	0.00993486	0.156016
PVP01_0010070			7.63911	2.61587	1.01666	2.573	0.010082	0.156873
PVP01_1018300			450.219	2.40099	0.933872	2.57101	0.0101403	0.156873
PVP01_0216700			1517.87	2.01542	0.782902	2.57429	0.0100446	0.156873
PVP01_1461500			190.775	-2.98988	1.1625	-2.57193	0.0101132	0.156873
PVP01_1135700			8.95345	-3.04101	1.18256	-2.57154	0.0101247	0.156873
PVP01_1330800			15.1862	-4.80103	1.86912	-2.56861	0.0102108	0.157495
PVP01_0913500			159.43	2.39623	0.935193	2.56228	0.0103988	0.159919
PVP01_0515000			19.8548	-2.99176	1.16905	-2.55914	0.0104932	0.160896
PVP01_1232400			375.455	1.61427	0.631664	2.55558	0.0106011	0.161259
PVP01_0408500			70.6545	-3.44704	1.34898	-2.55529	0.01061	0.161259
PVP01_0417200			89.8788	-4.73808	1.85341	-2.55642	0.0105755	0.161259
PVP01_0913900			49.5339	2.63995	1.03638	2.54729	0.0108563	0.164521
PVP01_0612100			44.3578	-2.44521	0.960644	-2.54538	0.0109158	0.164942
PVP01_1003500			11.1365	-2.9151	1.14586	-2.54403	0.0109582	0.165104
PVP01_0118000			48.6646	-2.24383	0.883104	-2.54084	0.0110586	0.166134
PVP01_1016100			330.751	1.90767	0.75153	2.53838	0.0111366	0.166825
PVP01_0623800			38.1701	-5.48889	2.16535	-2.53488	0.0112486	0.168018
PVP01_0003400			5.98072	5.27322	2.08671	2.52705	0.0115025	0.170829
PVP01_0948900			22.6831	3.71816	1.47118	2.52734	0.011493	0.170829
PVP01_1401100			49.904	4.06616	1.61212	2.52224	0.0116612	0.172691
PVP01_0914200			74.2134	-2.27862	0.904061	-2.52042	0.0117214	0.172838
PVP01_1026800			21.5828	-3.29662	1.30822	-2.51994	0.0117376	0.172838
PVP01_1031600			16.2528	-6.29224	2.4981	-2.51881	0.0117751	0.172901
PVP01_1325100			21.8039	-2.28796	0.908875	-2.51735	0.011824	0.17313
PVP01_0724800			114.636	1.79221	0.712299	2.51609	0.0118664	0.173263
PVP01_1208100			72.4182	2.65014	1.05684	2.50761	0.012155	0.175019
PVP01_0423000			532.279	2.52476	1.0059	2.50996	0.0120746	0.175019
PVP01_0709200			47.6956	2.44934	0.976012	2.50954	0.0120889	0.175019
PVP01_1332800			83.515	-1.97375	0.786889	-2.50829	0.0121317	0.175019
PVP01_1408800			16.3291	-2.91837	1.16208	-2.51133	0.0120278	0.175019
PVP01_0920100			50.2574	-3.04139	1.21393	-2.5054	0.0122313	0.17563
PVP01_1110600			14.2034	2.68606	1.07386	2.50131	0.0123736	0.176698
PVP01_1203800			1362.73	2.48586	0.993742	2.50152	0.0123663	0.176698
PVP01_0530100			28.0269	2.06624	0.828112	2.49512	0.0125913	0.179314
PVP01_0941900			8.55638	3.08323	1.23672	2.49306	0.0126646	0.179865
PVP01_0005160			5.68207	4.87579	1.95853	2.48952	0.0127917	0.18056
PVP01_1471300			17.1166	3.13855	1.26107	2.48879	0.0128178	0.18056
PVP01_0910200			128.185	-1.73801	0.698045	-2.48982	0.0127808	0.18056
PVP01_1431600			425.71	-1.51435	0.608803	-2.48742	0.0128672	0.180767
PVP01_1407600			114.67	1.74878	0.703936	2.48429	0.012981	0.181385
PVP01_0931200			121.988	-1.89845	0.764029	-2.48479	0.0129629	0.181385
PVP01_1205400			28.5663	-2.26758	0.913887	-2.48125	0.0130922	0.182449
PVP01_0703000			87.2457	-2.11751	0.853891	-2.47984	0.0131441	0.182682
PVP01_0104000			193.253	2.06756	0.834831	2.47663	0.0132631	0.183844
PVP01_0944400			35.4999	2.01257	0.813129	2.47509	0.0133202	0.184144
PVP01_0004240			228.04	4.57632	1.85141	2.4718	0.0134434	0.185197
PVP01_0911900			52.3275	1.82519	0.73888	2.47021	0.0135032	0.185197
PVP01_0410400			7.81417	-3.13727	1.26974	-2.47081	0.0134809	0.185197
PVP01_0102400			22.9686	2.51412	1.01817	2.46925	0.0135397	0.185209
PVP01_0102600			229.821	3.34281	1.35444	2.46803	0.013586	0.185354
PVP01_0947100			6.71537	4.07369	1.65736	2.45794	0.0139737	0.185395
PVP01_1401900			52.2477	3.37875	1.37372	2.45956	0.0139106	0.185395
PVP01_0004280			345.271	2.82719	1.14702	2.46482	0.0137081	0.185395
PVP01_1252000			10.557	2.63057	1.06966	2.45927	0.0139219	0.185395
PVP01_1401600			202.307	2.54401	1.03459	2.45897	0.0139338	0.185395
PVP01_1024900			151.072	1.99541	0.809049	2.46636	0.0136493	0.185395
PVP01_0214800			145.069	1.71505	0.697694	2.45817	0.0139647	0.185395
PVP01_1131200			367.15	-1.72504	0.700025	-2.46426	0.0137298	0.185395
PVP01_0313100			81.9236	-1.90269	0.772823	-2.462	0.0138165	0.185395
PVP01_1416600			28.4216	-2.66448	1.08324	-2.45974	0.0139039	0.185395
PVP01_1412200			8.21268	-2.89333	1.17723	-2.45774	0.0139813	0.185395
PVP01_1101300			1295.65	2.09361	0.852761	2.45509	0.0140849	0.186293
PVP01_0612900			231.13	-2.31045	0.941478	-2.45406	0.0141252	0.186353
PVP01_1209400			139.137	1.76636	0.720339	2.45213	0.0142014	0.186883
PVP01_0914500			23.024	-2.88407	1.1788	-2.44661	0.0144207	0.18929
PVP01_0309200			37.0257	2.37541	0.971424	2.44529	0.0144738	0.189508
PVP01_1422100			77.145	-1.72719	0.70679	-2.44371	0.014537	0.189858
PVP01_1240500			402.49	-1.56535	0.6412	-2.44128	0.0146351	0.19066
PVP01_1316200			11.8723	-3.27294	1.34207	-2.43871	0.0147397	0.191542
PVP01_0521000			54.4287	3.73422	1.53206	2.43737	0.0147943	0.191773
PVP01_0210100			69.3829	-2.68568	1.10263	-2.4357	0.0148632	0.192115
PVP01_1210300			9.95367	-2.97606	1.22229	-2.43482	0.0148993	0.192115
PVP01_0010200			14.3165	-6.10862	2.50967	-2.43403	0.0149316	0.192115
PVP01_0909000			6.88952	-2.93094	1.20466	-2.433	0.0149744	0.192189
PVP01_1270900			26.5168	2.87785	1.18328	2.4321	0.0150114	0.19219
PVP01_1458300			553.603	1.42912	0.587886	2.43095	0.0150592	0.192329
PVP01_1448900			78.2842	-2.17861	0.896984	-2.42882	0.0151482	0.192991
PVP01_0601900			382.607	3.04056	1.25338	2.42589	0.0152711	0.194081
PVP01_0906000			59.2991	1.9546	0.806205	2.42444	0.0153318	0.194378
PVP01_0001500			44.2903	3.36413	1.38962	2.42089	0.0154826	0.195811
PVP01_0523400			320.645	3.4573	1.42923	2.41899	0.0155637	0.196318
PVP01_0511700			162.457	-1.68373	0.696391	-2.41779	0.015615	0.196318
PVP01_1229500			83.8691	-1.94799	0.805852	-2.4173	0.015636	0.196318
PVP01_1030000			172.035	-2.18047	0.904325	-2.41116	0.015902	0.199177
PVP01_1117900			68.5165	-2.27124	0.942591	-2.40957	0.0159713	0.199541
PVP01_0935400			11.996	-2.85645	1.18587	-2.40874	0.0160078	0.199541
PVP01_0316800			119.062	-2.0994	0.87197	-2.40765	0.0160556	0.199658
PVP01_0816000			1281.74	-2.08089	0.864733	-2.4064	0.0161107	0.199865
PVP01_1020200			890.642	2.71518	1.13081	2.4011	0.0163457	0.202298
PVP01_0700400			31.3891	4.69014	1.96348	2.38869	0.0169087	0.204646
PVP01_0420100			91.2915	2.9837	1.25193	2.38328	0.0171589	0.204646
PVP01_1314400			39.4682	2.20485	0.922828	2.38923	0.0168835	0.204646
PVP01_0300800			85.2203	2.10459	0.879856	2.39197	0.0167583	0.204646
PVP01_0734400			131.771	2.10415	0.881962	2.38576	0.017044	0.204646
PVP01_1133600			67.9473	1.79162	0.749672	2.38987	0.0168544	0.204646
PVP01_0707500			101.58	1.74878	0.7332	2.38514	0.0170728	0.204646
PVP01_0940900			82.9673	1.71722	0.716715	2.39596	0.016577	0.204646
PVP01_1405700			57.7635	1.70953	0.716725	2.38519	0.0170703	0.204646
PVP01_0117400			115.063	1.64206	0.688943	2.38344	0.0171515	0.204646
PVP01_1459900			95.7668	-1.79867	0.753872	-2.38591	0.0170371	0.204646
PVP01_1265800			178.662	-1.88248	0.786419	-2.39373	0.0166779	0.204646
PVP01_0623100			738.61	-2.01759	0.845219	-2.38706	0.0169837	0.204646
PVP01_0618100			59.7278	-2.29549	0.960268	-2.39047	0.0168267	0.204646
PVP01_0104700			42.8078	-2.77337	1.16374	-2.38315	0.0171654	0.204646
PVP01_0612500			20.5691	-2.79721	1.17191	-2.38689	0.0169917	0.204646
PVP01_0421000			565.543	1.52508	0.640805	2.37995	0.0173149	0.205957
PVP01_1327000			7.12135	-2.98458	1.25608	-2.37611	0.0174964	0.20764
PVP01_1131100			37.3273	-2.28649	0.962763	-2.37493	0.0175523	0.207829
PVP01_0217100			92.4164	3.47074	1.46451	2.3699	0.0177931	0.20784
PVP01_0600900			116.677	2.36512	0.997842	2.37023	0.0177769	0.20784
PVP01_1218900			64.3587	-1.99372	0.840721	-2.37143	0.0177192	0.20784
PVP01_0212400			20.2388	-2.7573	1.16259	-2.37169	0.0177071	0.20784
PVP01_1021800			103.562	-2.80583	1.18286	-2.37207	0.0176887	0.20784
PVP01_1340000			14.5655	-3.06703	1.29218	-2.37353	0.0176189	0.20784
PVP01_0919100			40.3073	-1.82455	0.770318	-2.36856	0.0178573	0.208122
PVP01_0908700			339.993	2.44489	1.03536	2.36139	0.0182067	0.208811
PVP01_1422900			18.8018	2.13266	0.903379	2.36075	0.0182378	0.208811
PVP01_1147300			208.738	1.76554	0.746672	2.36455	0.0180519	0.208811
PVP01_0720100			121.64	-1.83009	0.77491	-2.36168	0.0181925	0.208811
PVP01_0507600			166.431	-2.04812	0.866643	-2.36329	0.0181137	0.208811
PVP01_1139000			24.7797	-2.84388	1.20269	-2.3646	0.0180498	0.208811
PVP01_0616200			12.2871	-2.95138	1.24969	-2.36169	0.0181921	0.208811
PVP01_1118000			8.53408	-3.27184	1.38437	-2.36341	0.0181075	0.208811
PVP01_1115800			47.7232	-1.90546	0.807971	-2.35833	0.0183575	0.209719
PVP01_1130200			242.094	1.7711	0.751574	2.35652	0.0184473	0.210283
PVP01_1101700			1274.25	2.27082	0.965017	2.35314	0.0186154	0.211415
PVP01_0831000			262.157	1.52605	0.648585	2.35289	0.0186279	0.211415
PVP01_1416800			186.497	-1.51283	0.643383	-2.35137	0.0187043	0.21182
PVP01_0000040			3.97115	4.72377	2.01445	2.34494	0.0190301	0.212909
PVP01_1402000			116.928	3.61848	1.54196	2.34667	0.0189418	0.212909
PVP01_0525200			69.5984	2.29919	0.98075	2.34432	0.0190619	0.212909
PVP01_0504700			72.5144	1.91961	0.819251	2.34313	0.0191226	0.212909
PVP01_1210100			50.3924	-1.83925	0.783862	-2.3464	0.0189559	0.212909
PVP01_1241500			29.6644	-1.90568	0.812671	-2.34496	0.0190289	0.212909
PVP01_1114700			25.0058	-2.65247	1.12972	-2.34791	0.0188793	0.212909
PVP01_1316500			10.1704	-3.01465	1.28665	-2.34302	0.0191282	0.212909
PVP01_0107400			92.0106	-1.89926	0.811131	-2.3415	0.0192065	0.213324
PVP01_1409200			250.846	-1.87435	0.800946	-2.34017	0.0192747	0.213625
PVP01_0000220			156.619	4.34636	1.86138	2.33502	0.0195422	0.214304
PVP01_1470900			17.7564	3.72651	1.595	2.33638	0.0194716	0.214304
PVP01_1320200			64.9697	1.89934	0.81305	2.33606	0.0194879	0.214304
PVP01_1017200			932.688	1.33561	0.57184	2.33564	0.0195102	0.214304
PVP01_0905500			20.834	-2.5437	1.08843	-2.33705	0.0194368	0.214304
PVP01_0315000			88.3273	-2.02559	0.867977	-2.33369	0.0196121	0.214618
PVP01_1419900			38.9567	1.80493	0.773947	2.33211	0.0196948	0.21507
PVP01_1336100			17.187	-2.68873	1.15363	-2.33067	0.0197707	0.215447
PVP01_0913300			102.415	-1.8271	0.784642	-2.32858	0.0198814	0.2162
PVP01_1448000			195.444	1.91146	0.822138	2.32499	0.0200723	0.216999
PVP01_1146900			529.141	1.76787	0.760329	2.32514	0.0200644	0.216999
PVP01_1130900			38.6033	-2.5974	1.11723	-2.32485	0.0200801	0.216999
PVP01_0824600			63.1435	-2.48462	1.07097	-2.31999	0.0203417	0.219369
PVP01_0304500			119.602	-2.19529	0.946654	-2.319	0.020395	0.219489
PVP01_1264900			15.4132	2.59617	1.11995	2.31811	0.0204432	0.219553
PVP01_1423500			16.6752	2.44113	1.05608	2.31149	0.0208058	0.221298
PVP01_1132400			108.258	2.38874	1.03315	2.31209	0.0207725	0.221298
PVP01_1424400			29.5481	2.12042	0.917432	2.31126	0.0208186	0.221298
PVP01_1266500			19.7723	2.09694	0.906393	2.3135	0.020695	0.221298
PVP01_1444300			363.8	-1.50923	0.652288	-2.31375	0.0206814	0.221298
PVP01_0002050			2.99073	4.46763	1.93622	2.3074	0.0210326	0.223013
PVP01_1470800			2.6648	-3.95348	1.71383	-2.30681	0.0210657	0.223013
PVP01_1406200			207.175	-1.48096	0.642544	-2.30484	0.0211758	0.223269
PVP01_1025900			65.9237	-2.24304	0.97301	-2.30526	0.0211522	0.223269
PVP01_0110700			29.0915	-2.14542	0.931514	-2.30315	0.0212702	0.223358
PVP01_0417400			30.3828	-5.16027	2.2403	-2.30338	0.0212574	0.223358
PVP01_1012000			96.1599	2.19255	0.953291	2.29998	0.0214494	0.224
PVP01_1028900			186.005	-1.91026	0.83072	-2.29953	0.021475	0.224
PVP01_0906500			45.9601	-2.55589	1.11173	-2.29902	0.0215037	0.224
PVP01_1408100			6.71095	-2.90546	1.26361	-2.29933	0.021486	0.224
PVP01_0521700			216.232	1.63174	0.710136	2.29779	0.0215739	0.224283
PVP01_0934100			5.1644	-3.29768	1.43669	-2.29533	0.0217141	0.225289
PVP01_1337200			31.1833	-1.83746	0.800794	-2.29455	0.0217592	0.225307
PVP01_0202000			535.627	3.59969	1.57157	2.2905	0.0219923	0.226818
PVP01_1020700			382.012	-2.11869	0.924948	-2.2906	0.0219863	0.226818
PVP01_1300600			2.35927	-3.74973	1.63778	-2.28952	0.0220493	0.226955
PVP01_0910700			132.871	-1.65393	0.722911	-2.28787	0.0221451	0.227491
PVP01_1147400			162.735	2.09421	0.916907	2.284	0.0223716	0.229364
PVP01_0201300			7.52233	3.53034	1.54704	2.282	0.0224892	0.229385
PVP01_0932400			247.09	2.00225	0.877517	2.28172	0.022506	0.229385
PVP01_0820500			244.845	-2.40179	1.05217	-2.28269	0.0224486	0.229385
PVP01_1218700			7.7492	-3.36405	1.4757	-2.27963	0.0226294	0.230191
PVP01_0121700			5.75934	4.46264	1.96086	2.27586	0.0228545	0.232027
PVP01_0517800			172.162	-1.58209	0.695584	-2.27448	0.0229371	0.232411
PVP01_0728700			34.9171	2.83609	1.25122	2.26667	0.0234104	0.23578
PVP01_0920200			158.181	-2.05532	0.90698	-2.26611	0.0234444	0.23578
PVP01_0725100			15.6756	-3.04845	1.3453	-2.26601	0.023451	0.23578
PVP01_1460300			5.07247	-3.27013	1.44202	-2.26775	0.0233446	0.23578
PVP01_0000180			21.1126	4.33254	1.91402	2.26358	0.0236	0.235909
PVP01_0534900			10.9443	3.30458	1.45975	2.2638	0.0235867	0.235909
PVP01_0714500			31.6033	1.69971	0.750444	2.26494	0.0235161	0.235909
PVP01_0001440			1156.82	2.29791	1.01766	2.25805	0.0239428	0.238877
PVP01_0830700			116.277	-2.26665	1.00461	-2.25625	0.0240549	0.239457
PVP01_0002210			4.80539	-4.55974	2.02148	-2.25564	0.0240931	0.239457
PVP01_1208000			249.495	2.74073	1.21695	2.25213	0.024314	0.240731
PVP01_0921000			56.7606	-1.88389	0.83644	-2.25227	0.0243054	0.240731
PVP01_0408900			80.8848	-1.95323	0.867878	-2.25058	0.0244121	0.241244
PVP01_0114200			159.048	1.90273	0.846359	2.24814	0.0245675	0.242318
PVP01_0404300			250.491	3.08914	1.37639	2.24438	0.0248081	0.243034
PVP01_1430600			12.1231	1.96598	0.875552	2.24542	0.024741	0.243034
PVP01_0934900			42.3416	-2.00513	0.893176	-2.24494	0.0247719	0.243034
PVP01_0718100			6.01006	-3.08318	1.37404	-2.24389	0.0248395	0.243034
PVP01_0717100			21.1465	-3.56394	1.58912	-2.24272	0.0249151	0.243034
PVP01_0909800			2.47564	-3.80089	1.69483	-2.24263	0.0249205	0.243034
PVP01_0820800			143.419	1.46994	0.656525	2.23897	0.0251579	0.244348
PVP01_1444000			259.816	-1.47377	0.659144	-2.23588	0.0253598	0.244348
PVP01_0920700			348.886	-1.9199	0.858021	-2.23759	0.0252477	0.244348
PVP01_1448600			25.8765	-2.05071	0.915811	-2.23923	0.0251408	0.244348
PVP01_0115500			32.6185	-2.47375	1.10657	-2.2355	0.0253844	0.244348
PVP01_1448800			15.4602	-2.50657	1.12074	-2.23653	0.0253173	0.244348
PVP01_1312600			12.6143	-2.64611	1.18297	-2.23683	0.0252974	0.244348
PVP01_1236300			37.3239	2.44199	1.09302	2.23417	0.0254717	0.244484
PVP01_0731500			285.835	-1.64322	0.735598	-2.23386	0.0254926	0.244484
PVP01_0902400			58.8696	2.87954	1.29019	2.23188	0.025623	0.244816
PVP01_0715300			17.8605	2.0291	0.909504	2.231	0.0256813	0.244816
PVP01_0209600			33.2155	-2.42139	1.08489	-2.23191	0.0256209	0.244816
PVP01_1109000			45.7619	-2.46009	1.10294	-2.23048	0.0257156	0.244816
PVP01_1247500			19.7763	-2.07239	0.929579	-2.22938	0.0257884	0.244926
PVP01_1323400			66.3617	-2.20684	0.99011	-2.22889	0.0258214	0.244926
PVP01_0725700			192.453	1.92176	0.862703	2.2276	0.0259069	0.24529
PVP01_0909200			41.2551	-1.7863	0.802462	-2.22603	0.0260122	0.245839
PVP01_0735100			34.3362	3.28798	1.47927	2.22271	0.0262354	0.246984
PVP01_1466300			19.8814	2.59182	1.16627	2.22231	0.0262622	0.246984
PVP01_1020000			80.0552	1.55831	0.701276	2.22211	0.026276	0.246984
PVP01_1029300			251.866	-2.34133	1.05437	-2.2206	0.0263784	0.2475
PVP01_1437500			7.92839	3.81719	1.72113	2.21784	0.0265655	0.248299
PVP01_1449600			95.6283	1.55345	0.700624	2.21724	0.0266068	0.248299
PVP01_0931300			62.7374	-1.85868	0.838216	-2.21743	0.026594	0.248299
PVP01_1120200			210.122	2.27	1.02495	2.21474	0.0267779	0.249129
PVP01_0213700			84.9799	-2.09279	0.945023	-2.21454	0.0267917	0.249129
PVP01_0604600			178.916	-1.63359	0.738746	-2.2113	0.0270151	0.250311
PVP01_1008700			112.595	-2.24869	1.01688	-2.21137	0.0270099	0.250311
PVP01_1340800			201.789	1.36464	0.617939	2.20837	0.0272187	0.251748
PVP01_0004990			5.15728	3.28831	1.49081	2.20571	0.027404	0.253013
PVP01_1345800			15.5559	2.44817	1.11111	2.20335	0.0275702	0.253702
PVP01_1101400			502.864	1.93403	0.877804	2.20326	0.0275763	0.253702
PVP01_0730300			74.9996	2.29769	1.04322	2.2025	0.0276299	0.253746
PVP01_1334800			13.2555	-2.4789	1.12685	-2.19985	0.0278173	0.255016
PVP01_1110900			95.8099	-1.93926	0.882546	-2.19734	0.0279959	0.256202
PVP01_1017800			141.793	-1.85856	0.846301	-2.19609	0.0280852	0.256567
PVP01_0310500			68.9659	-2.24202	1.02144	-2.19497	0.0281658	0.256852
PVP01_0610200			715.791	2.07978	0.950964	2.18702	0.0287411	0.26164
PVP01_1342200			199.196	1.38471	0.633591	2.18549	0.0288528	0.262198
PVP01_1034200			104.858	2.50055	1.14482	2.18423	0.0289451	0.262577
PVP01_0505700			83.5474	2.34976	1.07768	2.18039	0.0292286	0.264686
PVP01_0616600			65.0604	-2.10748	0.967605	-2.17804	0.0294032	0.265344
PVP01_1266800			5.54721	-3.39134	1.55682	-2.17838	0.0293776	0.265344
PVP01_1449800			199.942	1.50917	0.693582	2.1759	0.0295627	0.26632
PVP01_1301600			139.771	2.25191	1.03578	2.17412	0.0296964	0.26648
PVP01_1415700			22.2911	1.65779	0.762688	2.17361	0.0297342	0.26648
PVP01_0823300			279.226	-1.68336	0.774357	-2.17388	0.0297139	0.26648
PVP01_1024800			55.5639	2.21981	1.02214	2.17173	0.0298757	0.267287
PVP01_0706200			30.6504	-2.63639	1.21576	-2.16852	0.0301192	0.269003
PVP01_0605300			55.7753	2.0448	0.94354	2.16716	0.0302226	0.269464
PVP01_1034000			193.758	4.22252	1.94946	2.16599	0.030312	0.269797
PVP01_0814200			139.558	-3.52429	1.62866	-2.16392	0.0304708	0.270748
PVP01_1134500			27.5679	2.01553	0.932238	2.16204	0.0306152	0.270871
PVP01_0940100			936.066	1.89178	0.875136	2.1617	0.030641	0.270871
PVP01_1221800			217.116	-1.70831	0.790156	-2.162	0.0306185	0.270871
PVP01_1345700			104.693	2.11202	0.977503	2.16063	0.0307239	0.271142
PVP01_1240200			4.33105	2.69476	1.24798	2.1593	0.0308272	0.271593
PVP01_0801900			7795.87	1.64971	0.765659	2.15463	0.0311911	0.27249
PVP01_0532300			830.069	-1.40426	0.651712	-2.15473	0.0311832	0.27249
PVP01_1260000			777.169	-1.70077	0.788564	-2.1568	0.0310214	0.27249
PVP01_0316100			98.2682	-1.70129	0.789282	-2.15549	0.0311238	0.27249
PVP01_0514200			7.00273	-2.98106	1.38277	-2.15586	0.0310942	0.27249
PVP01_1308100			15.4723	-3.36999	1.5664	-2.15142	0.0314431	0.27423
PVP01_0216000			362.608	-1.9463	0.905894	-2.14849	0.0316752	0.275163
PVP01_1111200			343.114	-2.33806	1.08845	-2.14806	0.0317089	0.275163
PVP01_1311400			24.6504	-3.17885	1.47981	-2.14814	0.0317025	0.275163
PVP01_1463300			141.377	1.72541	0.804895	2.14364	0.0320614	0.277296
PVP01_0205500			18.6664	-2.63853	1.23055	-2.14419	0.032018	0.277296
PVP01_1147800			324.917	3.86611	1.80834	2.13793	0.0325228	0.277592
PVP01_1420500			191.024	2.04951	0.957223	2.1411	0.0322659	0.277592
PVP01_0817300			414.814	-1.60236	0.749249	-2.13862	0.0324667	0.277592
PVP01_0916900			61.9769	-1.63027	0.761562	-2.14069	0.0322987	0.277592
PVP01_1230800			168.739	-2.20603	1.0299	-2.14199	0.0321947	0.277592
PVP01_1336300			9.66667	-2.77302	1.29557	-2.14039	0.0323229	0.277592
PVP01_0010550			6.08701	-3.46722	1.62125	-2.13861	0.0324671	0.277592
PVP01_0523800			4.66824	-4.60052	2.1518	-2.13798	0.0325182	0.277592
PVP01_0707100			16.5086	-2.5195	1.1796	-2.13589	0.0326881	0.278545
PVP01_0010970			35.2904	3.1987	1.49901	2.13387	0.0328531	0.279393
PVP01_1013900			239.367	-1.76503	0.827345	-2.13336	0.032895	0.279393
PVP01_0207700			91.8871	1.3702	0.642682	2.132	0.0330072	0.279888
PVP01_0201500			245.211	1.55598	0.730249	2.13075	0.0331095	0.280298
PVP01_1448100			61.6515	2.15399	1.01206	2.12831	0.0333111	0.280826
PVP01_1129700			125.232	-1.73624	0.815567	-2.12887	0.0332648	0.280826
PVP01_1022300			19.9596	-2.88558	1.35598	-2.12804	0.0333339	0.280826
PVP01_1007300			59.6983	-1.51215	0.711362	-2.12571	0.0335271	0.281997
PVP01_0527400			500.073	1.65091	0.777071	2.12452	0.0336264	0.282108
PVP01_0924000			118.885	-1.54231	0.726048	-2.12425	0.0336489	0.282108
PVP01_0421100			53.3583	2.24153	1.05619	2.12228	0.0338145	0.28304
PVP01_1147500			1082.75	3.00448	1.41881	2.1176	0.0342085	0.285878
PVP01_1439100			4.01018	3.33908	1.57983	2.11357	0.0345518	0.287821
PVP01_1241100			40.3004	2.30563	1.09054	2.11422	0.0344967	0.287821
PVP01_0822000			23.8298	-2.09928	0.993544	-2.11292	0.0346075	0.287824
PVP01_1030900			4.29561	-4.49121	2.1274	-2.11112	0.0347619	0.288646
PVP01_1015000			45.6755	1.97394	0.935482	2.11008	0.0348515	0.288928
PVP01_0822300			38.9382	-1.80639	0.856964	-2.10789	0.0350402	0.289569
PVP01_0418800			219.622	-1.92734	0.914084	-2.10849	0.0349885	0.289569
PVP01_1411800			62.0472	-2.04592	0.971579	-2.10577	0.0352243	0.290628
PVP01_1430400			87.7648	1.46776	0.697273	2.10501	0.0352908	0.290715
PVP01_1238500			29.5969	2.02128	0.961528	2.10215	0.0355397	0.291841
PVP01_1020600			316.694	-1.72861	0.822299	-2.10217	0.0355381	0.291841
PVP01_0006750			12.5877	2.21173	1.05367	2.09907	0.0358108	0.293603
PVP01_0533800			21.8942	2.2726	1.08463	2.09527	0.036147	0.295893
PVP01_1124600			22.1417	2.00829	0.958865	2.09445	0.0362203	0.296023
PVP01_0940700			2.30154	-3.66911	1.75236	-2.09381	0.0362768	0.296023
PVP01_1217200			306.093	1.89247	0.904454	2.09239	0.0364036	0.296128
PVP01_0708900			88.3495	-1.623	0.77554	-2.09274	0.0363723	0.296128
PVP01_1329000			60.63	-1.70601	0.815786	-2.09124	0.0365064	0.2965
PVP01_MIT00400			2.24872	4.0124	1.9239	2.08555	0.0370191	0.297515
PVP01_0824500			170.743	1.85695	0.889215	2.08831	0.0367703	0.297515
PVP01_0512700			65.7589	-1.52329	0.730674	-2.08478	0.0370892	0.297515
PVP01_1450200			48.0438	-1.86821	0.89563	-2.08592	0.036986	0.297515
PVP01_1328500			146.823	-1.92925	0.925282	-2.08504	0.0370653	0.297515
PVP01_1019600			136.718	-2.00325	0.960398	-2.08585	0.036992	0.297515
PVP01_0919200			19.8059	-2.16988	1.0389	-2.08864	0.0367402	0.297515
PVP01_0916800			23.4944	-3.10664	1.48861	-2.08694	0.0368939	0.297515
PVP01_0532800			8.03215	-3.19558	1.53343	-2.08395	0.0371649	0.297663
PVP01_0108600			55.3089	-2.10062	1.00931	-2.08124	0.0374119	0.29918
PVP01_0606300			461.991	-1.6606	0.798226	-2.08037	0.0374917	0.299358
PVP01_0817800			77.5999	-2.56261	1.23329	-2.07786	0.0377221	0.299816
PVP01_1440300			6.93454	-2.59932	1.2506	-2.07845	0.037668	0.299816
PVP01_1272200			5.96817	-4.89468	2.35479	-2.0786	0.0376538	0.299816
PVP01_1226700			3.56594	3.5864	1.72768	2.07585	0.0379078	0.300794
PVP01_1229800			99.7201	-2.62638	1.26556	-2.07528	0.0379609	0.300794
PVP01_1014000			42.1335	-1.71396	0.826346	-2.07414	0.0380664	0.301171
PVP01_0002320			2.26096	4.01911	1.94135	2.07027	0.0384271	0.301728
PVP01_1420100			54.3303	1.80684	0.872714	2.07037	0.038418	0.301728
PVP01_0109700			277.681	1.7242	0.832369	2.07144	0.0383176	0.301728
PVP01_1015600			132.27	-1.85203	0.894328	-2.07086	0.0383721	0.301728
PVP01_0515500			42.08	-2.18022	1.05287	-2.07074	0.0383835	0.301728
PVP01_1435500			41.4125	1.98437	0.959095	2.069	0.0385459	0.301826
PVP01_0111000			152.597	-1.70701	0.825271	-2.06842	0.0386007	0.301826
PVP01_1429800			14.0374	-2.86992	1.38759	-2.06828	0.0386137	0.301826
PVP01_0924800			151.151	1.81511	0.878809	2.06542	0.0388834	0.302569
PVP01_1205600			186.989	-1.75068	0.847392	-2.06596	0.0388323	0.302569
PVP01_0704300			44.7204	-2.63164	1.27363	-2.06625	0.0388047	0.302569
PVP01_1339300			752.365	2.03464	0.986247	2.06302	0.0391112	0.303433
PVP01_0700200			15.2428	-2.38491	1.15586	-2.06332	0.0390822	0.303433
PVP01_1303900			17.9254	1.75396	0.851102	2.06081	0.0393207	0.304604
PVP01_1007500			20.0732	-2.37692	1.15395	-2.05982	0.0394158	0.304886
PVP01_1033900			3977.87	2.54248	1.23688	2.05556	0.0398254	0.30521
PVP01_1225000			2431.75	2.11916	1.02933	2.05877	0.0395167	0.30521
PVP01_0216800			149.83	1.86783	0.908271	2.05647	0.0397374	0.30521
PVP01_0606100			244.238	-1.44188	0.701236	-2.0562	0.0397637	0.30521
PVP01_1129000			63.306	-1.7376	0.845502	-2.05511	0.0398687	0.30521
PVP01_0520400			79.0849	-1.83266	0.890996	-2.05686	0.0396993	0.30521
PVP01_1233300			13.7107	-2.3299	1.13329	-2.05587	0.0397955	0.30521
PVP01_0942200			23.8254	1.90414	0.927839	2.05223	0.0401471	0.306439
PVP01_1404300			141.709	1.52873	0.744761	2.05264	0.040107	0.306439
PVP01_1269000			5.46971	2.89442	1.41646	2.04342	0.0410109	0.309847
PVP01_0503600			288.45	2.82128	1.37882	2.04615	0.0407417	0.309847
PVP01_0912400			206.267	2.21913	1.0856	2.04416	0.040938	0.309847
PVP01_1462700			181.448	1.98437	0.970079	2.04558	0.0407977	0.309847
PVP01_1325600			629.517	1.72445	0.843735	2.04383	0.0409703	0.309847
PVP01_1132000			72.8666	-1.57791	0.77214	-2.04355	0.040998	0.309847
PVP01_0211500			63.617	-1.82326	0.891649	-2.04482	0.0408729	0.309847
PVP01_MIT02200			3.32444	-4.07795	1.99817	-2.04084	0.0412663	0.311324
PVP01_0910800			10.4511	1.85802	0.911746	2.03787	0.0415627	0.311418
PVP01_0622200			49.2414	1.38574	0.679486	2.0394	0.0414106	0.311418
PVP01_1415500			33.3576	-1.67717	0.822237	-2.03977	0.0413732	0.311418
PVP01_0518700			294.818	-1.7225	0.844901	-2.0387	0.0414797	0.311418
PVP01_1269500			34.4023	-2.63611	1.29366	-2.03772	0.0415783	0.311418
PVP01_0809000			10.1168	2.37853	1.16767	2.03699	0.0416509	0.311513
PVP01_0825200			98.3856	1.78	0.875472	2.03319	0.0420334	0.313922
PVP01_1019200			201.943	1.54683	0.761197	2.0321	0.0421436	0.314293
PVP01_1437600			18.5826	2.79614	1.37867	2.02814	0.0425457	0.316488
PVP01_1219000			14.1135	-2.40082	1.18397	-2.02777	0.0425841	0.316488
PVP01_1214600			7.44708	-2.48533	1.22586	-2.02741	0.0426205	0.316488
PVP01_1431200			17.253	2.05115	1.01212	2.02659	0.0427044	0.316659
PVP01_0215100			86.9612	2.37539	1.17343	2.0243	0.0429389	0.316916
PVP01_1142200			242.868	-1.67441	0.827572	-2.02328	0.043044	0.316916
PVP01_1269700			36.1845	-2.16439	1.06863	-2.02538	0.0428279	0.316916
PVP01_1009500			38.6108	-2.26789	1.12077	-2.02351	0.0430206	0.316916
PVP01_0010220			5.00757	-4.65826	2.30193	-2.02363	0.0430084	0.316916
PVP01_1222900			591.2	-1.43464	0.709311	-2.02258	0.0431165	0.317001
PVP01_0534100			2.36754	3.19389	1.57961	2.02195	0.0431813	0.317029
PVP01_0317400			177.192	2.36726	1.17288	2.01833	0.0435568	0.317839
PVP01_0533200			55.1942	2.31966	1.14882	2.01917	0.04347	0.317839
PVP01_1131000			84.1388	1.8001	0.892306	2.01735	0.0436586	0.317839
PVP01_0715900			92.7388	1.71587	0.850411	2.01769	0.0436231	0.317839
PVP01_1006300			139.817	-1.40476	0.695724	-2.01913	0.0434732	0.317839
PVP01_0511600			15.2861	-1.84077	0.912217	-2.01791	0.0436006	0.317839
PVP01_0713700			122.34	1.44752	0.718281	2.01526	0.0438772	0.318538
PVP01_0818300			62.5628	-1.51693	0.75271	-2.01529	0.0438742	0.318538
PVP01_1302500			18.4731	-2.21995	1.10237	-2.0138	0.044031	0.319209
PVP01_0004390			2.5525	-3.74872	1.86346	-2.0117	0.0442513	0.32036
PVP01_1244200			12.0841	2.23073	1.11023	2.00924	0.0445116	0.321618
PVP01_0414400			38.3206	-1.58851	0.790738	-2.00889	0.0445489	0.321618
PVP01_1456600			349.546	1.92425	0.958389	2.00779	0.0446651	0.32201
PVP01_0813400			26.9806	-2.44426	1.21838	-2.00616	0.0448394	0.322819
PVP01_1132500			168.012	1.80124	0.898122	2.00556	0.0449027	0.322828
PVP01_0532500			81.3988	2.95812	1.47745	2.00218	0.0452657	0.324003
PVP01_1401300			582.454	1.85054	0.923838	2.0031	0.0451669	0.324003
PVP01_1234900			92.2086	1.76384	0.88096	2.00218	0.0452656	0.324003
PVP01_0611000			14.8229	1.72731	0.863164	2.00113	0.0453779	0.324003
PVP01_0523900			5.57214	-3.365	1.6814	-2.00131	0.0453595	0.324003
PVP01_0515300			85.012	-1.3283	0.664355	-1.99938	0.0455671	0.324908
PVP01_0204200			12.5382	-2.41356	1.20762	-1.99861	0.0456505	0.325056
PVP01_1345300			16.2432	2.92344	1.46386	1.99708	0.0458168	0.325064
PVP01_1462200			198.854	1.50352	0.752564	1.99787	0.0457309	0.325064
PVP01_1255900			341.936	-1.76566	0.884214	-1.99687	0.0458391	0.325064
PVP01_1306300			38.0064	1.8946	0.950457	1.99335	0.0462228	0.326448
PVP01_1029000			176.784	-1.49579	0.750012	-1.99436	0.0461128	0.326448
PVP01_1311700			3.65526	-2.7881	1.39832	-1.9939	0.0461629	0.326448
PVP01_1112700			26.1434	2.13528	1.07182	1.9922	0.0463494	0.326899
PVP01_0119200			8646.83	1.50115	0.754323	1.99006	0.0465844	0.328111
PVP01_0004250			48.5343	2.23359	1.12342	1.9882	0.0467895	0.328245
PVP01_0731800			151.223	1.77421	0.892382	1.98817	0.0467929	0.328245
PVP01_0907000			131.751	-1.48747	0.747773	-1.9892	0.0466792	0.328245
PVP01_1453600			76.7406	-1.39	0.699394	-1.98744	0.0468738	0.328369
PVP01_1346900			14.7037	1.87103	0.943277	1.98354	0.0473071	0.329002
PVP01_0606400			137.83	1.82133	0.918075	1.98386	0.047272	0.329002
PVP01_1317600			82.1524	1.72471	0.869061	1.98457	0.0471924	0.329002
PVP01_1224700			243.567	1.66363	0.840055	1.98038	0.0476604	0.329002
PVP01_1247300			135.515	-1.36539	0.689048	-1.98156	0.0475285	0.329002
PVP01_0918100			59.6989	-1.50944	0.761591	-1.98195	0.0474845	0.329002
PVP01_1205300			267.169	-1.56403	0.789426	-1.98122	0.0475664	0.329002
PVP01_0708400			40.9941	-1.60157	0.806538	-1.98573	0.0470632	0.329002
PVP01_1146700			26.8391	-1.61943	0.817404	-1.98119	0.0475701	0.329002
PVP01_1467800			18.7862	-2.14335	1.08007	-1.98446	0.0472047	0.329002
PVP01_0831900			57.324	-3.24527	1.63861	-1.9805	0.0476474	0.329002
PVP01_1255800			486.383	1.95963	0.989861	1.9797	0.0477375	0.329098
PVP01_0211600			130.581	-1.40546	0.710419	-1.97835	0.047889	0.329705
PVP01_0511400			351.139	-3.40674	1.72402	-1.97605	0.0481491	0.331057
PVP01_0936900			271.038	1.26682	0.641698	1.97416	0.0483635	0.331874
PVP01_0822500			201.958	-1.47789	0.748722	-1.97388	0.0483956	0.331874
PVP01_0005800			5.21348	3.0781	1.56012	1.97299	0.0484965	0.332128
PVP01_0721000			812.197	-1.53052	0.776498	-1.97106	0.0487173	0.333201
PVP01_0000090			46.6886	2.94385	1.49454	1.96974	0.0488684	0.333357
PVP01_0527100			18.595	2.41424	1.2255	1.97	0.0488385	0.333357
PVP01_1005400			56.0029	2.06413	1.04869	1.96829	0.049035	0.333618
PVP01_0830600			290.744	-1.52833	0.776367	-1.96856	0.0490037	0.333618
PVP01_1450300			42.0613	-1.48885	0.75772	-1.96491	0.0494246	0.334953
PVP01_0943300			94.52	-1.54032	0.783567	-1.96578	0.0493241	0.334953
PVP01_API01200			6.78488	-2.57481	1.31035	-1.96498	0.0494165	0.334953
PVP01_0907200			4.98016	-2.45709	1.2511	-1.96394	0.0495367	0.335276
PVP01_1131300			33.187	-2.23358	1.1377	-1.96324	0.0496187	0.335394
PVP01_0421500			30.1949	1.80777	0.921413	1.96195	0.0497681	0.335532
PVP01_1452300			302.986	1.24525	0.634609	1.96224	0.0497347	0.335532
PVP01_0622600			8.71265	2.36978	1.20856	1.96083	0.0498992	0.335979
PVP01_1220100			12.7853	2.20422	1.12445	1.96026	0.0499653	0.335989
PVP01_1460400			12.0653	1.7699	0.904168	1.95749	0.0502895	0.337732
PVP01_1400600			23.6013	2.73175	1.39719	1.95517	0.0505624	0.337819
PVP01_1031900			43.9651	1.52276	0.778515	1.95598	0.0504674	0.337819
PVP01_0108700			2199.1	-1.429	0.730852	-1.95525	0.0505541	0.337819
PVP01_1462300			24.9185	-1.84491	0.943109	-1.9562	0.0504419	0.337819
PVP01_0408000			131.549	1.57332	0.805207	1.95394	0.0507087	0.337928
PVP01_1110800			172.468	-1.54439	0.790348	-1.95407	0.0506933	0.337928
PVP01_1206500			42.6586	-1.533	0.784909	-1.9531	0.0508078	0.338155
PVP01_1264100			187.958	-1.55634	0.797263	-1.95211	0.0509255	0.338172
PVP01_1468300			5.99738	-4.83727	2.47813	-1.95198	0.0509404	0.338172
PVP01_1315800			99.5343	-1.27227	0.652588	-1.94957	0.0512269	0.33964
PVP01_1019900			109.367	1.4549	0.747513	1.94632	0.0516166	0.341788
PVP01_1230600			161.508	-1.4899	0.766059	-1.94489	0.0517878	0.341867
PVP01_1340400			277.665	-1.55546	0.799503	-1.94553	0.0517114	0.341867
PVP01_0931800			22.6776	-1.7045	0.876539	-1.94458	0.0518259	0.341867
PVP01_1033700			28.7581	1.79506	0.925353	1.93986	0.0523962	0.345191
PVP01_0734900			141.162	3.46038	1.78568	1.93785	0.0526415	0.346277
PVP01_0531500			44.3167	1.661	0.857328	1.93742	0.0526943	0.346277
PVP01_1013600			20.2605	-2.40292	1.24128	-1.93583	0.052888	0.347111
PVP01_0704900			78.9941	2.20122	1.13844	1.93353	0.0531705	0.348525
PVP01_0903100			3.00049	3.74371	1.93871	1.93103	0.0534789	0.349713
PVP01_1030300			26.396	-2.50347	1.29648	-1.93097	0.0534864	0.349713
PVP01_1220600			30.4811	1.73691	0.899819	1.93029	0.0535712	0.349828
PVP01_0522800			68.5652	1.44405	0.749527	1.92662	0.0540273	0.350431
PVP01_1105100			175.258	-1.19527	0.620506	-1.92629	0.054068	0.350431
PVP01_1134300			79.1731	-1.50352	0.780298	-1.92686	0.0539975	0.350431
PVP01_0209300			16.2877	-2.27231	1.17959	-1.92635	0.0540604	0.350431
PVP01_0423800			3.14274	-2.56664	1.33208	-1.9268	0.0540048	0.350431
PVP01_1214800			7.2246	-2.68738	1.39349	-1.92852	0.0537906	0.350431
PVP01_0727500			21.2665	-1.72043	0.893457	-1.92559	0.0541553	0.35056
PVP01_1035200			2.95941	3.19224	1.66007	1.92296	0.0544851	0.351778
PVP01_1242500			16.4637	2.42822	1.26298	1.92262	0.0545283	0.351778
PVP01_1224800			59.0411	1.76889	0.920112	1.92247	0.0545466	0.351778
PVP01_0611900			282.504	-1.59448	0.830244	-1.92049	0.0547957	0.35251
PVP01_1267300			17.1308	-2.10267	1.09462	-1.92092	0.0547421	0.35251
PVP01_1267100			99.3287	-1.69135	0.88126	-1.91924	0.0549542	0.352657
PVP01_0107500			184.103	-2.48656	1.29539	-1.91954	0.0549159	0.352657
PVP01_1231500			325.728	-1.57189	0.819354	-1.91845	0.0550535	0.352858
PVP01_0525700			29.3717	-1.92638	1.00501	-1.91678	0.0552658	0.353348
PVP01_0620300			195.864	-3.18154	1.65979	-1.91683	0.0552598	0.353348
PVP01_0112600			92.6802	-1.75306	0.914997	-1.91592	0.0553759	0.353617
PVP01_1135400			99.5747	-1.26582	0.660966	-1.9151	0.0554793	0.353842
PVP01_1026400			179.514	-1.71421	0.895668	-1.91389	0.0556346	0.354297
PVP01_1114800			85.0128	-1.73828	0.908441	-1.91348	0.055687	0.354297
PVP01_0834400			92.8335	1.75142	0.915679	1.9127	0.0557861	0.354494
PVP01_0731700			183.218	-1.23616	0.646696	-1.9115	0.0559409	0.355044
PVP01_1402300			113.746	4.42463	2.3166	1.90997	0.0561367	0.355227
PVP01_1417300			20.019	3.03827	1.59054	1.91022	0.0561055	0.355227
PVP01_0713600			133.185	1.48289	0.776515	1.90968	0.0561748	0.355227
PVP01_0726600			45.3999	1.55865	0.816443	1.90907	0.0562532	0.35529
PVP01_1208200			6.58166	-2.63134	1.37939	-1.90762	0.0564409	0.355612
PVP01_0304200			5.57978	-3.33142	1.74625	-1.90776	0.0564224	0.355612
PVP01_0719700			247.308	-1.71313	0.898724	-1.90618	0.0566265	0.356332
PVP01_0210200			19.8292	-2.56528	1.34613	-1.90568	0.0566923	0.356332
PVP01_0415000			372.083	-1.43502	0.753889	-1.90349	0.0569771	0.357433
PVP01_1457200			11.729	-2.19634	1.15398	-1.90327	0.057005	0.357433
PVP01_1206100			63.0618	1.89699	0.997822	1.90113	0.057285	0.358756
PVP01_0403500			15.5671	8.24196	4.33859	1.89968	0.0574745	0.35925
PVP01_0721700			47.7681	-1.58789	0.83596	-1.89947	0.0575021	0.35925
PVP01_0517500			20.7815	2.19678	1.15774	1.89747	0.0577655	0.360462
PVP01_1207000			23.3336	1.54686	0.81614	1.89534	0.0580479	0.360925
PVP01_1222800			252.168	-1.78138	0.939669	-1.89575	0.0579927	0.360925
PVP01_1137100			15.5552	-2.35465	1.24183	-1.89611	0.0579452	0.360925
PVP01_0116700			105.159	-2.09562	1.10766	-1.89193	0.0584999	0.36307
PVP01_0520100			39.8848	-2.45826	1.29951	-1.89169	0.0585327	0.36307
PVP01_0514000			336.06	1.59625	0.844528	1.89011	0.0587429	0.36394
PVP01_1256100			10.997	-1.99714	1.057	-1.88944	0.0588332	0.364065
PVP01_0320200			67.5188	1.98039	1.05009	1.88592	0.0593057	0.366553
PVP01_1028300			134.643	1.77683	0.943765	1.8827	0.0597406	0.368365
PVP01_0918000			97.115	-1.58413	0.841245	-1.88308	0.0596896	0.368365
PVP01_1023200			10.6708	2.67859	1.42351	1.88168	0.0598794	0.368783
PVP01_0838100			70.0899	2.38936	1.27052	1.88063	0.0600227	0.36882
PVP01_1121900			24.9983	1.98955	1.05794	1.88059	0.0600273	0.36882
PVP01_1147200			19.4263	2.87328	1.53019	1.87773	0.0604185	0.370348
PVP01_1335900			17.9586	2.67298	1.4233	1.87802	0.0603788	0.370348
PVP01_0600600			10.4814	2.97819	1.58673	1.87694	0.060526	0.37057
PVP01_1402500			96.4722	2.4813	1.32308	1.8754	0.060737	0.371164
PVP01_1235900			24.4393	-2.34948	1.25293	-1.8752	0.0607659	0.371164
PVP01_0510900			76.9835	2.53037	1.34979	1.87463	0.0608431	0.3712
PVP01_0812300			16.3309	-2.48329	1.32545	-1.87354	0.0609938	0.371683
PVP01_1468100			9.1414	2.44997	1.31092	1.86889	0.0616387	0.373561
PVP01_1228200			66.3153	1.95447	1.04538	1.86963	0.0615355	0.373561
PVP01_1260800			238.87	-1.39265	0.744679	-1.87013	0.0614657	0.373561
PVP01_0521900			14.104	-2.08245	1.11437	-1.86872	0.0616613	0.373561
PVP01_0518000			22.2143	-2.09653	1.12162	-1.8692	0.0615953	0.373561
PVP01_1134100			25.0771	-1.66374	0.891325	-1.86659	0.0619589	0.374927
PVP01_0938900			27.5185	2.08753	1.11892	1.86567	0.062088	0.375272
PVP01_1317300			80.2238	1.35733	0.727858	1.86483	0.0622055	0.375545
PVP01_1431800			405.352	1.59587	0.856188	1.86393	0.0623322	0.375873
PVP01_0923200			48.6095	2.14953	1.15575	1.85985	0.0629062	0.378456
PVP01_1120600			17.1244	-2.22301	1.19501	-1.86024	0.0628513	0.378456
PVP01_1268000			11.4465	-2.14613	1.15449	-1.85893	0.0630364	0.378801
PVP01_0315300			489.519	-1.56682	0.844389	-1.85556	0.0635161	0.381243
PVP01_1005600			38.8508	-2.27995	1.22918	-1.85485	0.0636178	0.381413
PVP01_0117700			118.217	-1.44228	0.777923	-1.85401	0.0637379	0.381693
PVP01_1235700			228.102	-1.4053	0.758254	-1.85334	0.0638343	0.38183
PVP01_1326200			94.2359	-1.64677	0.889115	-1.85215	0.0640042	0.382407
PVP01_0513200			172.711	-1.57077	0.848459	-1.85132	0.064123	0.382677
PVP01_1250500			64.0806	2.365	1.27836	1.85002	0.06431	0.383234
PVP01_1345000			95.41	1.50562	0.814003	1.84965	0.0643638	0.383234
PVP01_1028000			39.4086	-1.71983	0.931623	-1.84605	0.0648845	0.385892
PVP01_0824200			32.0238	2.08395	1.13032	1.84368	0.0652305	0.386623
PVP01_0517300			87.7589	-1.57893	0.856192	-1.84413	0.0651642	0.386623
PVP01_0823500			60.9216	-1.68258	0.912302	-1.84433	0.0651357	0.386623
PVP01_0000160			1446.73	3.48658	1.89277	1.84205	0.0654679	0.387147
PVP01_0102300			42.5812	-3.18934	1.73137	-1.84209	0.0654616	0.387147
PVP01_0606200			153.003	-1.62462	0.88306	-1.83976	0.0658036	0.38869
PVP01_1239400			39.5573	-1.56908	0.853294	-1.83885	0.0659374	0.389038
PVP01_1322900			48.933	2.27465	1.2374	1.83825	0.0660259	0.389118
PVP01_0901200			12.4439	7.94403	4.341	1.83	0.0672499	0.391012
PVP01_1340500			17.8193	2.12944	1.16216	1.83231	0.0669057	0.391012
PVP01_0609600			66.8574	1.99663	1.08889	1.83365	0.0667065	0.391012
PVP01_1233000			97.0946	1.89176	1.03132	1.83432	0.0666071	0.391012
PVP01_0202200			671.149	1.84782	1.0083	1.83261	0.0668599	0.391012
PVP01_1409500			115.024	1.27439	0.695678	1.83186	0.0669718	0.391012
PVP01_0312800			56.6181	-1.5617	0.851917	-1.83316	0.0667788	0.391012
PVP01_1027300			54.0581	-1.83256	0.999429	-1.83361	0.0667125	0.391012
PVP01_API01400			32.5222	-1.90872	1.04292	-1.83016	0.067226	0.391012
PVP01_1342300			41.6808	-2.12774	1.16178	-1.83145	0.0670338	0.391012
PVP01_1338300			45.8086	-2.26131	1.23234	-1.83498	0.0665084	0.391012
PVP01_0927900			10.5667	-2.28281	1.24689	-1.83081	0.0671295	0.391012
PVP01_0307000			63.8036	1.56775	0.858138	1.82693	0.0677107	0.39108
PVP01_1217900			70.9216	-1.35442	0.741373	-1.82691	0.0677129	0.39108
PVP01_1209000			175.747	-1.37249	0.751106	-1.8273	0.0676548	0.39108
PVP01_0930800			264.415	-1.63962	0.896629	-1.82865	0.0674516	0.39108
PVP01_1338500			61.4892	-2.55476	1.39767	-1.82787	0.0675685	0.39108
PVP01_0417000			44.2979	-2.65705	1.45245	-1.82936	0.0673455	0.39108
PVP01_1401200			44.5929	3.39704	1.86309	1.82334	0.0682525	0.392738
PVP01_0834300			38.1842	1.73541	0.951717	1.82345	0.0682356	0.392738
PVP01_1107600			1152.9	1.65459	0.907616	1.82301	0.0683022	0.392738
PVP01_1133200			43.9587	-2.17056	1.18992	-1.82412	0.0681345	0.392738
PVP01_0722200			29.8449	1.50586	0.826984	1.8209	0.0686219	0.39414
PVP01_0517600			86.4209	-1.86732	1.02596	-1.82006	0.0687492	0.394435
PVP01_1405000			88.3572	1.66069	0.912808	1.81932	0.0688622	0.394648
PVP01_1140800			20.0676	-2.00879	1.10451	-1.81871	0.0689554	0.394747
PVP01_1034100			27.2784	2.02308	1.1142	1.81572	0.0694131	0.394874
PVP01_1260300			46.5051	1.74907	0.963364	1.81559	0.0694334	0.394874
PVP01_1314900			42.5791	-1.58942	0.875251	-1.81595	0.0693775	0.394874
PVP01_1009600			43.585	-1.78575	0.983497	-1.81571	0.0694142	0.394874
PVP01_1325000			4.52496	-2.27342	1.25154	-1.8165	0.0692936	0.394874
PVP01_1239500			8.41778	-2.39279	1.31719	-1.81659	0.06928	0.394874
PVP01_1461300			42.2255	-2.22815	1.22782	-1.81473	0.0695661	0.395197
PVP01_1111400			156.606	1.82903	1.0088	1.81307	0.0698203	0.39575
PVP01_0615700			65.8422	-1.99694	1.10169	-1.81261	0.069892	0.39575
PVP01_1138600			12.3586	-2.19199	1.20901	-1.81304	0.0698256	0.39575
PVP01_0713800			462.506	-1.40626	0.776351	-1.81137	0.0700832	0.396077
PVP01_1123500			397.895	-1.80829	0.998367	-1.81125	0.0701021	0.396077
PVP01_1116800			134.713	2.14142	1.18274	1.81056	0.070209	0.39625
PVP01_0604500			351.833	1.79515	0.992938	1.80792	0.0706197	0.397704
PVP01_1004100			32.3931	1.56486	0.865363	1.80832	0.0705564	0.397704
PVP01_1343400			57.8917	-1.39341	0.772471	-1.80384	0.0712569	0.400859
PVP01_1219200			262.063	2.41317	1.34127	1.79917	0.0719918	0.401516
PVP01_1402700			565.956	2.0768	1.15413	1.79946	0.0719459	0.401516
PVP01_0414000			36.3266	1.84183	1.02211	1.80199	0.0715472	0.401516
PVP01_0717400			392.902	1.51436	0.841129	1.80039	0.0717998	0.401516
PVP01_0610100			88.4986	-1.31818	0.731993	-1.80081	0.0717332	0.401516
PVP01_1102400			12.6644	-1.9982	1.11015	-1.79994	0.0718707	0.401516
PVP01_1428800			22.3819	-2.01172	1.11723	-1.80064	0.0717601	0.401516
PVP01_1409800			15.1883	-2.13808	1.18771	-1.80017	0.071834	0.401516
PVP01_1231100			101.795	-2.23713	1.24454	-1.79756	0.0722473	0.40251
PVP01_1449500			11.6928	2.4827	1.38405	1.79379	0.0728461	0.404608
PVP01_0527200			21.1042	1.80194	1.00448	1.79391	0.0728276	0.404608
PVP01_0810300			194.677	-1.94978	1.087	-1.79372	0.0728574	0.404608
PVP01_0423100			261.112	2.39945	1.33922	1.79168	0.0731841	0.405699
PVP01_1032600			283.329	-1.51028	0.843014	-1.79152	0.07321	0.405699
PVP01_1447100			151.922	1.51816	0.848124	1.79002	0.0734503	0.406597
PVP01_0520300			40.8796	-1.49459	0.835966	-1.78786	0.0737992	0.408094
PVP01_0705000			19.6007	2.11702	1.18642	1.78437	0.0743633	0.40874
PVP01_0210000			68.0479	2.05074	1.14821	1.78604	0.0740922	0.40874
PVP01_0909300			159.271	1.58332	0.887399	1.78422	0.0743878	0.40874
PVP01_0944000			51.2834	1.4941	0.836495	1.78614	0.0740762	0.40874
PVP01_1009100			46.8109	-1.35451	0.758627	-1.78548	0.0741842	0.40874
PVP01_1025200			40.0708	-2.10704	1.18089	-1.78428	0.0743782	0.40874
PVP01_0304800			302.802	-1.12897	0.633458	-1.78224	0.0747103	0.409267
PVP01_0618200			1192.33	-1.26029	0.70716	-1.78218	0.0747199	0.409267
PVP01_1012200			45.9278	-2.03548	1.14193	-1.78249	0.074669	0.409267
PVP01_1233100			94.5088	1.36882	0.769203	1.77953	0.0751534	0.411208
PVP01_0000140			48.4504	2.35064	1.32327	1.77639	0.0756681	0.412704
PVP01_0946900			16.5505	1.42781	0.803979	1.77593	0.0757444	0.412704
PVP01_1121300			218.844	-1.43218	0.806244	-1.77636	0.0756739	0.412704
PVP01_1031200			6.39856	-3.54287	1.99462	-1.77622	0.0756972	0.412704
PVP01_1340200			5.94328	2.93686	1.65543	1.77408	0.0760503	0.413409
PVP01_0910000			13.5313	2.18163	1.23132	1.77178	0.0764305	0.413409
PVP01_1239300			26.1145	-1.40533	0.792837	-1.77254	0.0763054	0.413409
PVP01_0815300			135.767	-1.42352	0.802796	-1.77321	0.0761946	0.413409
PVP01_1309900			135.88	-1.64266	0.926893	-1.77222	0.076358	0.413409
PVP01_0809200			14.8141	-2.02189	1.14011	-1.77341	0.0761611	0.413409
PVP01_0206600			160.068	-2.37149	1.33789	-1.77256	0.0763016	0.413409
PVP01_1243800			55.6236	1.84426	1.0415	1.77078	0.0765971	0.413449
PVP01_1128900			79.2259	1.21157	0.684082	1.77109	0.076546	0.413449
PVP01_0824900			13.0564	-2.26737	1.28124	-1.76966	0.076783	0.414023
PVP01_0105500			108.716	1.73373	0.981671	1.7661	0.0773792	0.415943
PVP01_1464600			150.296	1.33457	0.755352	1.76682	0.0772589	0.415943
PVP01_0814000			28.5562	-2.07876	1.17684	-1.76639	0.0773299	0.415943
PVP01_1027500			368.782	1.04761	0.594256	1.76289	0.0779191	0.41755
PVP01_1252600			126.801	-1.43891	0.81602	-1.76333	0.0778446	0.41755
PVP01_1268500			27.1421	-2.00155	1.13482	-1.76376	0.077773	0.41755
PVP01_0525100			22.0433	3.56951	2.026	1.76185	0.0780948	0.417763
PVP01_1309200			142.693	1.18782	0.674244	1.7617	0.0781196	0.417763
PVP01_1314700			67.4552	-1.73748	0.986667	-1.76096	0.0782459	0.418009
PVP01_0521100			16.1064	1.85324	1.05297	1.76001	0.0784068	0.418009
PVP01_1132100			76.7251	-1.31416	0.7465	-1.76042	0.0783362	0.418009
PVP01_0217000			81.1349	2.09097	1.1894	1.75801	0.0787462	0.41853
PVP01_0927500			185.751	1.90026	1.08082	1.75816	0.07872	0.41853
PVP01_1245000			148.689	1.77913	1.01157	1.75879	0.0786139	0.41853
PVP01_0515200			14.227	1.65282	0.941454	1.7556	0.0791561	0.420279
PVP01_1324800			408.403	-1.33418	0.76018	-1.75509	0.0792448	0.420321
PVP01_0112900			52.438	-1.55924	0.888839	-1.75424	0.0793894	0.420659
PVP01_0523600			21.3501	2.8444	1.62199	1.75364	0.0794914	0.42077
PVP01_1029700			9.64907	2.30697	1.3171	1.75155	0.0798508	0.421385
PVP01_1451800			23.384	-1.70034	0.970724	-1.75162	0.0798393	0.421385
PVP01_1016800			12.3582	-2.41334	1.3771	-1.75248	0.0796915	0.421385
PVP01_0514400			19.4157	-2.12418	1.21332	-1.75072	0.0799939	0.421712
PVP01_1429300			20.1694	2.06294	1.179	1.74973	0.0801651	0.422186
PVP01_1315200			72.9764	-1.60742	0.920036	-1.74713	0.0806151	0.424127
PVP01_0804900			15.3819	2.01979	1.15656	1.74639	0.080744	0.424375
PVP01_1337500			39.8029	1.30448	0.748247	1.74338	0.0812665	0.42583
PVP01_1246500			62.53	-1.62313	0.930648	-1.74408	0.0811448	0.42583
PVP01_1459200			15.0604	-2.00936	1.15229	-1.74379	0.0811956	0.42583
PVP01_1403200			18.4602	2.29719	1.31845	1.74234	0.0814493	0.426358
PVP01_0202300			1463.41	2.94141	1.69025	1.74022	0.0818204	0.427853
PVP01_0709500			11.286	2.35325	1.35262	1.73977	0.0818995	0.427853
PVP01_0940200			38.5308	1.60178	0.920939	1.7393	0.0819827	0.427857
PVP01_0711500			21.9847	-1.68865	0.971438	-1.7383	0.0821581	0.428343
PVP01_0928100			10.0119	-2.06881	1.19096	-1.73709	0.0823709	0.429022
PVP01_0104900			19.2743	-1.59846	0.920924	-1.73571	0.0826155	0.429865
PVP01_0800100			3.58365	-4.16412	2.40011	-1.73497	0.0827457	0.430112
PVP01_1007700			7.68951	-2.40177	1.38538	-1.73366	0.0829787	0.430755
PVP01_1122900			4.45378	-2.65097	1.5294	-1.73334	0.0830351	0.430755
PVP01_0521200			19.5462	2.1517	1.24284	1.73128	0.0834024	0.431817
PVP01_0803800			162.709	-1.26147	0.728724	-1.73107	0.0834389	0.431817
PVP01_0807600			66.4679	-2.33014	1.34629	-1.73079	0.0834891	0.431817
PVP01_1204800			13.9334	2.66393	1.54164	1.72798	0.083991	0.432093
PVP01_0929100			410.344	1.58662	0.918338	1.7277	0.0840412	0.432093
PVP01_0212100			497.123	-1.39129	0.805013	-1.72829	0.083937	0.432093
PVP01_0112300			269.072	-1.71934	0.994542	-1.72877	0.0838501	0.432093
PVP01_0823400			21.3106	-1.93475	1.11941	-1.72836	0.0839234	0.432093
PVP01_0119000			10.6104	-2.26809	1.31161	-1.72924	0.0837662	0.432093
PVP01_0909600			14.7997	1.97024	1.14303	1.7237	0.0847618	0.432673
PVP01_1240300			81.8392	1.82497	1.05709	1.72642	0.0842727	0.432673
PVP01_1008800			192.377	1.58296	0.918523	1.72338	0.08482	0.432673
PVP01_0929200			52.3885	-1.22634	0.711326	-1.72402	0.0847035	0.432673
PVP01_1319900			102.778	-1.60347	0.92989	-1.72437	0.0846418	0.432673
PVP01_0420400			147.988	-1.79053	1.03735	-1.72606	0.0843375	0.432673
PVP01_0727600			12.7725	-2.13458	1.23737	-1.7251	0.0845101	0.432673
PVP01_0405300			15.8664	-3.19503	1.85163	-1.72553	0.0844328	0.432673
PVP01_0422000			78.4627	1.7044	0.989675	1.72219	0.0850359	0.432925
PVP01_0615800			15.6871	-2.18768	1.27012	-1.72243	0.0849919	0.432925
PVP01_0624100			24.9597	1.85504	1.07794	1.7209	0.0852683	0.433292
PVP01_1439900			13.742	1.57312	0.914875	1.71949	0.0855247	0.433292
PVP01_0727000			35.4866	-1.43535	0.834556	-1.71989	0.0854521	0.433292
PVP01_0907600			56.8159	-1.54495	0.898454	-1.71957	0.085511	0.433292
PVP01_0703800			120.243	-3.99837	2.32516	-1.71961	0.0855037	0.433292
PVP01_0614200			55.5289	-1.56834	0.912917	-1.71794	0.0858079	0.433881
PVP01_0818800			15.5483	-2.46335	1.43379	-1.71808	0.0857827	0.433881
PVP01_1104800			53.0541	2.82778	1.64833	1.71554	0.0862468	0.435676
PVP01_1330100			52217.1	1.29264	0.753966	1.71445	0.086446	0.435835
PVP01_0604800			163.827	-1.3165	0.767784	-1.71468	0.0864037	0.435835
PVP01_0208400			23.8598	-1.48667	0.867685	-1.71338	0.0866428	0.43631
PVP01_1029600			31.8993	-1.99596	1.16517	-1.71302	0.0867081	0.43631
PVP01_1452400			105.903	1.23125	0.719236	1.71189	0.0869171	0.436939
PVP01_1004600			4.09501	-2.14018	1.25173	-1.70978	0.0873061	0.438471
PVP01_1019100			102.96	-1.28226	0.75042	-1.70873	0.0875008	0.438601
PVP01_0412000			41.0773	-1.48405	0.868509	-1.70874	0.0874993	0.438601
PVP01_0916600			49.5392	-2.40991	1.41084	-1.70814	0.0876103	0.438727
PVP01_0504300			89.1459	1.80169	1.05538	1.70715	0.0877948	0.439227
PVP01_1305600			32.4442	1.92527	1.12881	1.70558	0.0880862	0.439838
PVP01_0405000			2056.4	-1.48162	0.868475	-1.706	0.0880088	0.439838
PVP01_1146000			56.4677	-1.25143	0.734338	-1.70417	0.0883502	0.440734
PVP01_1335800			4.28999	2.56374	1.50629	1.70201	0.0887526	0.441123
PVP01_0409300			182.056	-1.10621	0.649949	-1.70199	0.0887568	0.441123
PVP01_0720900			62.5356	-1.1699	0.687156	-1.70253	0.0886569	0.441123
PVP01_0113300			193.369	-1.80558	1.0609	-1.70193	0.0887678	0.441123
PVP01_0808400			473.781	2.11817	1.24492	1.70145	0.0888579	0.441149
PVP01_1149000			6.71744	-3.6014	2.11792	-1.70044	0.0890473	0.441668
PVP01_0311300			306.272	1.33616	0.786465	1.69894	0.0893307	0.44223
PVP01_1454000			181.019	-1.08209	0.636837	-1.69916	0.0892882	0.44223
PVP01_1140600			24.2575	-1.8946	1.11571	-1.69811	0.0894877	0.442585
PVP01_1437000			117.753	-1.16067	0.684316	-1.6961	0.0898667	0.443615
PVP01_1264700			38.9553	-2.0342	1.19911	-1.69643	0.089804	0.443615
PVP01_0907300			184.874	-1.74026	1.02711	-1.69432	0.0902051	0.444553
PVP01_1119000			16.2831	-1.79752	1.06099	-1.6942	0.0902277	0.444553
PVP01_0201700			317.335	1.82875	1.07971	1.69375	0.0903135	0.444555
PVP01_1202200			4.32459	2.23916	1.32329	1.69211	0.0906241	0.44482
PVP01_0716500			41.3355	1.79317	1.05919	1.69296	0.0904637	0.44482
PVP01_0203800			60.178	1.58004	0.933703	1.69223	0.0906024	0.44482
PVP01_1119200			96.7623	2.23351	1.32102	1.69075	0.0908842	0.445042
PVP01_0704000			22.5133	1.73532	1.02649	1.69053	0.0909263	0.445042
PVP01_0215900			20.8319	-1.61683	0.956156	-1.69097	0.0908425	0.445042
PVP01_0623600			58.5332	3.21183	1.90161	1.68901	0.0912183	0.445632
PVP01_1432100			13.1344	2.24126	1.32692	1.68908	0.0912048	0.445632
PVP01_1331100			82.1426	1.75177	1.03832	1.68712	0.0915804	0.446981
PVP01_1262400			6.48373	1.94402	1.15273	1.68645	0.0917096	0.447192
PVP01_1109900			7.76488	2.77081	1.64343	1.686	0.0917966	0.447197
PVP01_1421000			51.9659	1.70197	1.00989	1.68531	0.0919287	0.447263
PVP01_0407600			14.0931	1.55638	0.923653	1.68503	0.0919823	0.447263
PVP01_1239600			63.8473	-1.53375	0.910708	-1.68413	0.0921557	0.447687
PVP01_0417300			58.2952	-2.51891	1.49638	-1.68333	0.0923109	0.448022
PVP01_0606000			24.3768	-3.07759	1.82904	-1.68262	0.0924479	0.448269
PVP01_1140700			106.088	-1.49504	0.889122	-1.68148	0.0926695	0.448925
PVP01_0929700			187.065	-1.07579	0.640158	-1.68051	0.0928583	0.44942
PVP01_1462900			22.0764	-1.85166	1.10215	-1.68003	0.0929509	0.44945
PVP01_0700300			20.1799	3.51511	2.09413	1.67855	0.0932395	0.450008
PVP01_0945800			40.2215	-1.81916	1.08359	-1.67884	0.093184	0.450008
PVP01_1201700			247.876	2.03299	1.21566	1.67233	0.0944594	0.45142
PVP01_1323800			36.5364	1.94276	1.16161	1.67247	0.0944313	0.45142
PVP01_1269300			66.967	1.78749	1.06906	1.67202	0.0945201	0.45142
PVP01_1132600			55.3392	1.7456	1.04168	1.67576	0.0937851	0.45142
PVP01_1110100			78.9846	1.73492	1.03834	1.67087	0.0947477	0.45142
PVP01_1269600			9.83366	1.70076	1.01697	1.67238	0.0944501	0.45142
PVP01_0706400			27.4808	1.54639	0.923903	1.67376	0.0941775	0.45142
PVP01_1317900			101.598	1.16599	0.69703	1.67279	0.0943678	0.45142
PVP01_1227500			77.8208	-1.14109	0.680668	-1.67642	0.0936552	0.45142
PVP01_0603000			113.392	-1.14411	0.684404	-1.67169	0.094586	0.45142
PVP01_1324700			502.651	-1.15239	0.687747	-1.6756	0.093817	0.45142
PVP01_1464300			25.1122	-1.82835	1.09252	-1.67351	0.0942263	0.45142
PVP01_1122400			171.728	-1.92283	1.14805	-1.67487	0.0939598	0.45142
PVP01_0733600			14.4196	-2.21888	1.32767	-1.67126	0.0946705	0.45142
PVP01_1019000			17.2956	-1.82288	1.09162	-1.66989	0.0949421	0.451931
PVP01_1427900			4.97173	1.96372	1.17658	1.66901	0.0951161	0.452346
PVP01_1208300			47.3142	-1.6454	0.986451	-1.66799	0.0953168	0.452885
PVP01_0113400			107.184	-1.36828	0.821389	-1.66581	0.0957504	0.45453
PVP01_0944200			17.8255	2.0654	1.24122	1.66401	0.0961113	0.455827
PVP01_1239200			59.8862	1.43924	0.866222	1.66152	0.0966097	0.456525
PVP01_1143700			40.357	1.37701	0.828763	1.66153	0.096608	0.456525
PVP01_0215800			5.29865	-2.00685	1.20753	-1.66194	0.0965238	0.456525
PVP01_0006650			3.14546	-3.92087	2.35942	-1.66179	0.0965548	0.456525
PVP01_1213100			11.2184	2.3237	1.40088	1.65875	0.0971666	0.457079
PVP01_0735200			773.93	1.4405	0.868063	1.65944	0.0970266	0.457079
PVP01_0717300			222.132	-1.25998	0.759353	-1.65928	0.0970595	0.457079
PVP01_0512600			47.3721	-1.69972	1.02378	-1.66023	0.0968682	0.457079
PVP01_0414500			5.38924	-2.55945	1.54267	-1.6591	0.0970965	0.457079
PVP01_1202400			59.5676	-1.32728	0.802662	-1.6536	0.0982087	0.461563
PVP01_0317200			138.709	1.41905	0.858975	1.65202	0.0985295	0.462235
PVP01_1323100			69.2188	-1.51081	0.914418	-1.65221	0.0984916	0.462235
PVP01_0811100			10.2146	2.83815	1.71866	1.65137	0.0986631	0.462445
PVP01_0918800			222.185	-1.00005	0.606434	-1.64906	0.0991352	0.463498
PVP01_0932900			25.5847	-2.61718	1.58717	-1.64896	0.0991555	0.463498
PVP01_0838500			2.8833	-3.0018	1.81952	-1.64977	0.0989897	0.463498
PVP01_1325200			261.108	-1.19128	0.722744	-1.64828	0.0992956	0.463736
PVP01_0924400			363.522	1.16523	0.707903	1.64604	0.0997564	0.46547
PVP01_1312100			32.953	-2.04916	1.24549	-1.64526	0.0999171	0.465802
PVP01_1122500			14.2077	2.52358	1.53452	1.64454	0.100065	0.466075
PVP01_1266400			21.3826	2.43557	1.4829	1.64244	0.100498	0.467673
PVP01_0838800			4.07362	2.90436	1.76939	1.64145	0.100704	0.468172
PVP01_1300900			153.469	2.40588	1.46829	1.63856	0.101306	0.468172
PVP01_0119900			10.0648	2.28291	1.39329	1.6385	0.101317	0.468172
PVP01_1436700			44.2172	1.50863	0.919331	1.64101	0.100795	0.468172
PVP01_1324100			29.8421	-1.3365	0.815374	-1.63913	0.101186	0.468172
PVP01_1325500			85.2565	-1.84603	1.12598	-1.63949	0.101112	0.468172
PVP01_0837100			22.1879	-1.87336	1.14261	-1.63955	0.101099	0.468172
PVP01_1312200			2.72215	-2.31765	1.41453	-1.63846	0.101326	0.468172
PVP01_0117500			30.6045	1.42968	0.87323	1.63723	0.101583	0.468526
PVP01_0726200			22.7169	-1.92458	1.17528	-1.63755	0.101515	0.468526
PVP01_0412800			97.0457	-1.11485	0.682039	-1.63459	0.102135	0.468921
PVP01_0103700			521.803	-1.17164	0.71624	-1.63583	0.101876	0.468921
PVP01_1139900			1319.23	-1.24032	0.758887	-1.63439	0.102177	0.468921
PVP01_1125900			73.4325	-1.27863	0.782035	-1.63501	0.102048	0.468921
PVP01_1213600			64.7322	-1.94931	1.19178	-1.63563	0.101917	0.468921
PVP01_API04100			12.6097	-2.77752	1.70003	-1.6338	0.1023	0.468921
PVP01_0304600			6.56392	-2.89586	1.77201	-1.63423	0.102212	0.468921
PVP01_1413600			24.2543	1.79576	1.10024	1.63216	0.102646	0.469768
PVP01_1244900			63.8373	-2.20098	1.34859	-1.63207	0.102666	0.469768
PVP01_1435300			146.465	1.3539	0.830096	1.63101	0.102888	0.47037
PVP01_1006800			108.988	1.63708	1.00551	1.6281	0.103503	0.470701
PVP01_1447900			202.256	1.38698	0.851813	1.62827	0.103468	0.470701
PVP01_1126600			909.617	1.18484	0.72738	1.62892	0.103331	0.470701
PVP01_1018600			300.214	-1.27498	0.782172	-1.63005	0.103092	0.470701
PVP01_0602800			204.299	-1.32066	0.810818	-1.62879	0.103357	0.470701
PVP01_0938300			34.4118	-1.73218	1.06354	-1.6287	0.103377	0.470701
PVP01_0204000			30.5308	1.45366	0.893565	1.62681	0.103776	0.471118
PVP01_0319600			201.577	-1.29003	0.792779	-1.62722	0.103691	0.471118
PVP01_1217500			73.9404	-1.66009	1.02182	-1.62465	0.104238	0.472799
PVP01_1112800			29.9602	-1.53954	0.948121	-1.62378	0.104423	0.473225
PVP01_1221500			176.66	-1.19954	0.73895	-1.6233	0.104524	0.473273
PVP01_0209100			537.529	1.05479	0.650299	1.622	0.104802	0.474119
PVP01_1445900			340.685	1.36817	0.844437	1.62021	0.105187	0.475446
PVP01_1435400			3.94087	-2.11219	1.30445	-1.61922	0.1054	0.475992
PVP01_1413900			5.82151	2.15977	1.33588	1.61674	0.105935	0.476003
PVP01_0836900			43.1955	1.60659	0.994553	1.61539	0.106227	0.476003
PVP01_0112200			178.918	1.58814	0.98185	1.6175	0.105771	0.476003
PVP01_0618300			755.905	1.37783	0.85326	1.61478	0.106358	0.476003
PVP01_0608500			24.7574	1.24153	0.767346	1.61795	0.105674	0.476003
PVP01_0835100			654.734	0.973746	0.602414	1.61641	0.106007	0.476003
PVP01_0106600			88.7108	-1.37938	0.853563	-1.61603	0.106089	0.476003
PVP01_0213300			63.507	-1.40098	0.867034	-1.61583	0.106132	0.476003
PVP01_0914600			20.9643	-1.75954	1.08981	-1.61454	0.106409	0.476003
PVP01_0708800			13.5669	-2.0967	1.29789	-1.61547	0.106209	0.476003
PVP01_0949100			9.47998	-2.59214	1.60431	-1.61573	0.106152	0.476003
PVP01_1112100			7.58168	1.62092	1.00443	1.61378	0.106575	0.476335
PVP01_0412100			78.724	-1.53768	0.953195	-1.61318	0.106705	0.476504
PVP01_1258600			43.5729	-1.37345	0.852423	-1.61123	0.107129	0.477517
PVP01_0831700			107.944	-1.701	1.05595	-1.61087	0.107207	0.477517
PVP01_1418300			14.6687	-2.0867	1.2952	-1.61109	0.107159	0.477517
PVP01_0725900			48.7495	1.43533	0.892263	1.60864	0.107695	0.478461
PVP01_0504500			453042	1.09559	0.680801	1.60927	0.107557	0.478461
PVP01_1327400			35.6199	-1.31969	0.820339	-1.60872	0.107679	0.478461
PVP01_1263500			30.3348	-1.46378	0.911416	-1.60605	0.108264	0.480577
PVP01_0532600			344.714	1.70832	1.06533	1.60356	0.108812	0.481774
PVP01_1021700			25.985	-1.38322	0.862562	-1.60362	0.108798	0.481774
PVP01_1031000			17.9282	-2.39759	1.49513	-1.6036	0.108803	0.481774
PVP01_0940000			13.7515	-1.96075	1.22326	-1.60289	0.10896	0.482019
PVP01_0313000			28.9839	-1.41302	0.881788	-1.60245	0.109056	0.482037
PVP01_1438400			32.5538	2.43384	1.51973	1.6015	0.109267	0.482147
PVP01_0305400			325.792	1.36925	0.854864	1.60172	0.109218	0.482147
PVP01_1219100			29.6689	1.7789	1.11217	1.59949	0.109713	0.482171
PVP01_1250400			246.334	1.47768	0.923906	1.59938	0.109736	0.482171
PVP01_0943200			54.0233	-1.46814	0.917496	-1.60016	0.109562	0.482171
PVP01_0605700			74.478	-1.54315	0.964139	-1.60054	0.109478	0.482171
PVP01_1145600			64.1152	-1.58213	0.988689	-1.60023	0.109547	0.482171
PVP01_1424800			10.0785	1.55651	0.974399	1.5974	0.110176	0.483696
PVP01_0711600			90.8693	-1.20263	0.753534	-1.59598	0.110492	0.4839
PVP01_0509900			75.774	-1.25174	0.784328	-1.59594	0.110502	0.4839
PVP01_1207500			11.1203	-2.61849	1.64065	-1.59601	0.110487	0.4839
PVP01_1437800			239.734	1.36489	0.855676	1.5951	0.11069	0.484315
PVP01_1142900			634.477	1.4571	0.914586	1.59318	0.111121	0.48579
PVP01_0532200			49.9878	1.32507	0.832016	1.5926	0.111249	0.485945
PVP01_0709400			36.6781	1.27051	0.797978	1.59216	0.11135	0.485975
PVP01_0926200			13.7034	-2.00652	1.26072	-1.59157	0.111482	0.486144
PVP01_0623300			25.0146	-1.90814	1.20001	-1.59011	0.11181	0.487168
PVP01_0605000			81.1077	-1.50324	0.946053	-1.58896	0.112069	0.48762
PVP01_0311600			11.391	-1.87399	1.1798	-1.5884	0.112196	0.48762
PVP01_1343300			12.929	-1.93421	1.21758	-1.58857	0.112156	0.48762
PVP01_1321400			345.574	1.03813	0.65394	1.5875	0.112398	0.488093
PVP01_1319000			17.1315	-1.82294	1.14907	-1.58645	0.112638	0.488724
PVP01_1115400			11.9665	2.31046	1.45743	1.5853	0.112898	0.489036
PVP01_0622500			15.5286	-1.86693	1.17738	-1.58567	0.112815	0.489036
PVP01_0003350			2.23248	2.45369	1.54977	1.58326	0.113362	0.49023
PVP01_1026300			99.7136	-1.12505	0.71049	-1.58348	0.113312	0.49023
PVP01_0411300			239.107	1.61513	1.02067	1.58242	0.113553	0.490648
PVP01_0511900			93.9777	1.65785	1.04841	1.5813	0.113809	0.491339
PVP01_1111000			16.0546	-1.75935	1.11288	-1.58089	0.113902	0.491339
PVP01_0527500			221.981	1.03775	0.656628	1.58043	0.114009	0.491394
PVP01_1127400			27.6738	1.49636	0.948206	1.57809	0.114545	0.493292
PVP01_0202500			172.003	2.01172	1.27586	1.57675	0.114852	0.494179
PVP01_0606500			78.0796	-1.06491	0.675544	-1.57637	0.114941	0.494179
PVP01_1237300			22.0828	1.49298	0.947353	1.57595	0.115037	0.494182
PVP01_0835200			33.745	-1.2958	0.823063	-1.57436	0.115404	0.49535
PVP01_1250900			37.4743	1.93065	1.22795	1.57226	0.115891	0.495802
PVP01_0825500			53.6412	1.09897	0.698926	1.57237	0.115864	0.495802
PVP01_0705200			55.6845	-1.27924	0.813466	-1.57258	0.115817	0.495802
PVP01_1145700			29.296	-1.80502	1.14748	-1.57303	0.115711	0.495802
PVP01_0801600			1003.96	1.67352	1.06535	1.57086	0.116215	0.496782
PVP01_1323300			108.276	-1.57539	1.00316	-1.57042	0.116317	0.496807
PVP01_1100700			2.60919	3.22354	2.05472	1.56885	0.116683	0.497554
PVP01_0205800			110.997	1.23331	0.786002	1.56909	0.116627	0.497554
PVP01_0800600			2.43506	3.18478	2.03198	1.56733	0.117038	0.498501
PVP01_0813200			40.9052	-1.37176	0.875364	-1.56708	0.117097	0.498501
PVP01_0829100			69.9517	-1.36024	0.868486	-1.56622	0.117297	0.498945
PVP01_0109500			13.4888	-1.91495	1.22309	-1.56566	0.117427	0.49909
PVP01_0313300			94.1308	1.65086	1.05523	1.56445	0.117711	0.499834
PVP01_1442800			16.2437	-1.50838	0.964463	-1.56396	0.117828	0.499834
PVP01_0913800			62.9845	-2.11986	1.35568	-1.56369	0.117891	0.499834
PVP01_1225200			63.1218	1.76084	1.12825	1.56069	0.118598	0.499892
PVP01_0611300			112.136	1.49505	0.958392	1.55996	0.11877	0.499892
PVP01_1316300			58.6498	1.45528	0.93122	1.56277	0.118108	0.499892
PVP01_0518200			201.216	-1.15181	0.737265	-1.56228	0.118223	0.499892
PVP01_1323200			322.238	-1.23182	0.789372	-1.5605	0.118641	0.499892
PVP01_0214600			23.3172	-1.24165	0.79584	-1.56017	0.11872	0.499892
PVP01_0513000			75.8428	-1.33758	0.85701	-1.56075	0.118582	0.499892
PVP01_0929000			18.4984	-1.74066	1.11412	-1.56236	0.118203	0.499892
PVP01_1115700			21.6987	-1.78649	1.14513	-1.56007	0.118742	0.499892
PVP01_0103500			4.42182	2.04402	1.31154	1.55849	0.119117	0.500947
PVP01_1232800			51.5211	1.18006	0.758236	1.55633	0.119631	0.502099
PVP01_1033000			21.1647	-1.36157	0.874954	-1.55616	0.11967	0.502099
PVP01_0423400			47.6856	-1.88347	1.21068	-1.55571	0.119777	0.502099
PVP01_1272300			5.31488	-3.26325	2.09754	-1.55575	0.119768	0.502099
PVP01_1400900			42.8577	2.30645	1.48335	1.55489	0.119973	0.502515
PVP01_0614300			47.8222	-1.38849	0.894308	-1.55258	0.120523	0.504311
PVP01_0815600			6.56767	-1.91817	1.23571	-1.55228	0.120596	0.504311
PVP01_1129900			36.907	-1.75927	1.13372	-1.55176	0.120719	0.504418
PVP01_0211000			78.9654	1.41257	0.91071	1.55106	0.120887	0.504715
PVP01_0530300			11.2338	2.14346	1.38301	1.54984	0.121179	0.505125
PVP01_1331400			34.8398	-1.26648	0.81717	-1.54984	0.121179	0.505125
PVP01_1006200			34.3906	1.71333	1.10651	1.54841	0.121524	0.505432
PVP01_0523300			49.4441	-1.78825	1.15467	-1.54871	0.121451	0.505432
PVP01_1266300			30.9187	-2.18226	1.40944	-1.54832	0.121545	0.505432
PVP01_0600300			26.3129	6.57229	4.25942	1.543	0.122831	0.506521
PVP01_0944300			11.3406	2.89879	1.87922	1.54255	0.12294	0.506521
PVP01_1016500			125.031	1.95942	1.27037	1.5424	0.122976	0.506521
PVP01_0004320			19.0951	1.89632	1.22751	1.54484	0.122384	0.506521
PVP01_1332600			24.7317	1.32933	0.861826	1.54246	0.122962	0.506521
PVP01_0712900			170.889	1.0774	0.696613	1.54663	0.121953	0.506521
PVP01_1317200			220.71	0.923613	0.598159	1.54409	0.122565	0.506521
PVP01_1249500			145.833	-1.16822	0.75578	-1.54571	0.122175	0.506521
PVP01_0904200			17.2042	-1.49805	0.971223	-1.54244	0.122967	0.506521
PVP01_0107900			120.276	-1.52504	0.988703	-1.54247	0.12296	0.506521
PVP01_1428200			134.56	-1.72683	1.11841	-1.544	0.122588	0.506521
PVP01_0719300			51.2831	-1.8512	1.19879	-1.54422	0.122535	0.506521
PVP01_0623900			139.666	3.15944	2.04895	1.54198	0.123078	0.506539
PVP01_0203400			113.364	-1.10639	0.718315	-1.54025	0.123499	0.50787
PVP01_0811600			11.1509	2.09893	1.36328	1.53962	0.123653	0.508033
PVP01_1456000			170.267	-1.01595	0.660013	-1.53929	0.123734	0.508033
PVP01_0414800			153.172	-1.42992	0.929248	-1.5388	0.123854	0.508124
PVP01_1305300			227.235	-1.19727	0.778273	-1.53836	0.12396	0.508158
PVP01_1034600			16.042	1.84183	1.19769	1.53781	0.124095	0.50831
PVP01_0717600			32.5634	1.42491	0.92788	1.53566	0.124621	0.508871
PVP01_1141400			209.686	1.21157	0.788964	1.53564	0.124626	0.508871
PVP01_1225600			92.913	-1.09827	0.71537	-1.53525	0.124721	0.508871
PVP01_1453500			144.595	-1.16482	0.757971	-1.53677	0.124351	0.508871
PVP01_1221100			139.216	-1.20395	0.784065	-1.53553	0.124654	0.508871
PVP01_1346000			90.3319	-1.27937	0.833855	-1.53428	0.12496	0.509135
PVP01_0423500			24.3168	-6.66592	4.3449	-1.53419	0.124982	0.509135
PVP01_0809100			24.5592	2.16848	1.41429	1.53327	0.125211	0.509268
PVP01_1335600			11.625	1.46299	0.95394	1.53363	0.12512	0.509268
PVP01_1232500			1244.23	1.41391	0.923431	1.53114	0.125734	0.510199
PVP01_0732900			31.8975	-1.5295	0.998826	-1.5313	0.125695	0.510199
PVP01_0417100			52.1556	-2.70967	1.76903	-1.53172	0.125591	0.510199
PVP01_1235500			18.5715	-1.42772	0.933039	-1.53018	0.125972	0.510767
PVP01_1452600			48.9503	-1.90693	1.24678	-1.52948	0.126144	0.511066
PVP01_0941000			74.3116	1.70091	1.11256	1.52882	0.12631	0.511267
PVP01_0214300			231.407	0.964778	0.631197	1.52849	0.126391	0.511267
PVP01_0106400			22.8386	-1.37325	0.898828	-1.52782	0.126557	0.51154
PVP01_0406600			44.0013	-1.27645	0.836343	-1.52623	0.126954	0.511985
PVP01_0530700			810.63	-1.52494	0.9987	-1.52692	0.126781	0.511985
PVP01_0406500			5.57804	-1.86762	1.22371	-1.52619	0.126962	0.511985
PVP01_0840900			5.18903	6.63415	4.35979	1.52167	0.128093	0.512173
PVP01_0009470			5.18903	6.63415	4.35979	1.52167	0.128093	0.512173
PVP01_0838900			2.28048	3.08836	2.02751	1.52323	0.127702	0.512173
PVP01_1201900			66.4638	2.42067	1.5881	1.52426	0.127444	0.512173
PVP01_1310500			100.417	1.09004	0.716027	1.52235	0.127922	0.512173
PVP01_0202900			97693.1	0.956881	0.628566	1.52232	0.127928	0.512173
PVP01_1313400			63.4463	-1.09951	0.720743	-1.52552	0.12713	0.512173
PVP01_0317300			244.651	-1.28917	0.846094	-1.52368	0.127589	0.512173
PVP01_1218800			28.2505	-1.72066	1.13015	-1.5225	0.127883	0.512173
PVP01_0215200			17.069	-1.78935	1.17585	-1.52175	0.128071	0.512173
PVP01_1147000			6.35244	-3.14956	2.06771	-1.52321	0.127707	0.512173
PVP01_0104400			37.5603	-1.35945	0.894487	-1.51982	0.128557	0.513242
PVP01_0728200			12.04	-1.88403	1.2394	-1.52011	0.128483	0.513242
PVP01_1449200			122.451	1.51924	1.00149	1.51698	0.129271	0.513608
PVP01_0818000			50.7589	1.33395	0.879024	1.51754	0.129131	0.513608
PVP01_1024000			164.817	1.25629	0.828174	1.51694	0.129281	0.513608
PVP01_1120300			38.588	1.19583	0.78844	1.51671	0.129341	0.513608
PVP01_1325900			155.26	-1.30234	0.858428	-1.51713	0.129235	0.513608
PVP01_0812900			44.0424	-1.42165	0.936413	-1.51819	0.128967	0.513608
PVP01_0314400			49.2767	-1.80295	1.18738	-1.51842	0.128908	0.513608
PVP01_0300300			4.86936	6.6106	4.36031	1.51609	0.129498	0.513839
PVP01_0004310			2.85568	2.57261	1.69772	1.51533	0.129689	0.514204
PVP01_0714900			15.9479	-1.58395	1.04586	-1.5145	0.129899	0.514645
PVP01_0201800			115.132	2.26424	1.49847	1.51103	0.13078	0.51684
PVP01_1131800			38.9382	1.27892	0.846598	1.51066	0.130875	0.51684
PVP01_0412500			583.77	-1.21388	0.803905	-1.50998	0.131049	0.51684
PVP01_0317500			108.863	-1.22319	0.810065	-1.50999	0.131045	0.51684
PVP01_1205700			137.053	-1.24948	0.827349	-1.51022	0.130988	0.51684
PVP01_1337100			14.0671	-1.63142	1.08042	-1.50999	0.131046	0.51684
PVP01_1261200			12.717	1.97063	1.30574	1.5092	0.131247	0.517227
PVP01_0938700			13.8029	3.25439	2.15884	1.50747	0.131689	0.518577
PVP01_0000050			23.0318	1.39131	0.925108	1.50394	0.132596	0.521358
PVP01_0010670			3.20219	-2.58126	1.71617	-1.50408	0.13256	0.521358
PVP01_0117800			187.045	-1.34784	0.896939	-1.50271	0.132913	0.522208
PVP01_1010400			8.8464	2.07972	1.38505	1.50154	0.133215	0.52227
PVP01_1318800			95.9781	1.31892	0.878685	1.50101	0.133352	0.52227
PVP01_0723000			51.2714	1.12382	0.749053	1.50032	0.133531	0.52227
PVP01_0834000			59.1116	-1.56274	1.04094	-1.50128	0.133284	0.52227
PVP01_0509700			13.8628	-1.71704	1.14423	-1.50061	0.133457	0.52227
PVP01_0620500			3.47547	-2.17984	1.45184	-1.50143	0.133243	0.52227
PVP01_1268100			49.9708	-1.52836	1.0201	-1.49825	0.134068	0.523976
PVP01_0602600			66.9729	1.40788	0.940532	1.4969	0.13442	0.524685
PVP01_1451300			30.3233	-1.36261	0.910598	-1.49639	0.134553	0.524685
PVP01_0418100			2.87672	-1.95684	1.30757	-1.49655	0.134511	0.524685
PVP01_0524300			16.4124	2.16674	1.45022	1.49408	0.135156	0.525196
PVP01_0202600			147.771	1.57528	1.05427	1.49419	0.135127	0.525196
PVP01_1431900			158.459	1.18072	0.790374	1.49387	0.13521	0.525196
PVP01_1318900			34.7605	1.11188	0.744641	1.49318	0.135391	0.525196
PVP01_0930600			61.5454	-1.67208	1.11968	-1.49335	0.135346	0.525196
PVP01_1461600			91.6424	-1.75961	1.17691	-1.49511	0.134886	0.525196
PVP01_0408300			70.5412	-1.84123	1.23291	-1.4934	0.135333	0.525196
PVP01_1401000			93.7906	3.59675	2.4124	1.49094	0.135976	0.527074
PVP01_0313900			101.105	1.33857	0.898472	1.48983	0.136269	0.527814
PVP01_1031500			4.5512	3.27415	2.20293	1.48628	0.137206	0.528054
PVP01_1033300			10.1535	1.9065	1.28305	1.48591	0.137304	0.528054
PVP01_0215600			470.389	1.83444	1.23609	1.48407	0.137791	0.528054
PVP01_1469500			1780.66	1.80564	1.21259	1.48908	0.136467	0.528054
PVP01_0511800			51.8057	1.57181	1.05695	1.48712	0.136983	0.528054
PVP01_0409000			179.313	1.41763	0.95364	1.48655	0.137134	0.528054
PVP01_0801400			57.9745	1.19117	0.802069	1.48512	0.137512	0.528054
PVP01_1229700			734.66	-1.00915	0.679497	-1.48514	0.137507	0.528054
PVP01_1451200			83.6747	-1.05727	0.712782	-1.4833	0.137995	0.528054
PVP01_0408700			100.357	-1.1341	0.764304	-1.48384	0.137852	0.528054
PVP01_1146400			41.1951	-1.14363	0.769676	-1.48586	0.137315	0.528054
PVP01_0207200			107.684	-1.16199	0.78164	-1.48661	0.137119	0.528054
PVP01_0809300			29.0975	-1.34765	0.906393	-1.48683	0.137059	0.528054
PVP01_0313500			120.073	-1.44463	0.973921	-1.48331	0.137991	0.528054
PVP01_0703500			162.371	-1.63959	1.10434	-1.48468	0.13763	0.528054
PVP01_1108400			11.3702	-1.68216	1.13425	-1.48306	0.138058	0.528054
PVP01_1238400			49.2508	-2.38973	1.60695	-1.48713	0.136982	0.528054
PVP01_1137200			37.5737	-1.21257	0.81795	-1.48245	0.138222	0.528292
PVP01_1421300			15.7107	1.76084	1.1882	1.48195	0.138355	0.528412
PVP01_1436300			201.109	1.05039	0.709914	1.4796	0.13898	0.530408
PVP01_1258000			50.9517	3.45154	2.33491	1.47823	0.139345	0.530772
PVP01_0534800			4.47391	3.24789	2.20054	1.47595	0.139957	0.530772
PVP01_1470500			80.5797	2.73916	1.85747	1.47467	0.1403	0.530772
PVP01_1433600			95.011	2.24858	1.52371	1.47572	0.140018	0.530772
PVP01_0937100			25.392	1.58048	1.07158	1.4749	0.140238	0.530772
PVP01_1433100			84.2603	-1.19643	0.81094	-1.47536	0.140115	0.530772
PVP01_1319700			34.8787	-1.21449	0.822743	-1.47614	0.139906	0.530772
PVP01_1213400			138.619	-1.24775	0.844726	-1.4771	0.139649	0.530772
PVP01_0409800			28.9932	-1.6407	1.11082	-1.47702	0.139671	0.530772
PVP01_0304300			12.4286	-1.66967	1.12993	-1.47768	0.139494	0.530772
PVP01_1032100			7.34136	-1.80008	1.2175	-1.4785	0.139274	0.530772
PVP01_0934200			50.2811	-3.54714	2.40514	-1.47481	0.140263	0.530772
PVP01_1206900			62.0272	-1.39701	0.947901	-1.47379	0.140538	0.531283
PVP01_1216500			160.367	-1.33751	0.908105	-1.47286	0.140788	0.531457
PVP01_0821800			119.736	-1.35251	0.918209	-1.47299	0.140754	0.531457
PVP01_1017100			504.516	-1.24636	0.846712	-1.472	0.14102	0.531562
PVP01_1422300			17.9452	-1.85613	1.26082	-1.47216	0.140977	0.531562
PVP01_0900900			4.17373	6.39349	4.36541	1.46458	0.143036	0.533713
PVP01_1116300			44.5711	2.52674	1.72243	1.46696	0.142386	0.533713
PVP01_0307900			5.88053	1.85199	1.26462	1.46447	0.143066	0.533713
PVP01_0610000			3343.09	1.05287	0.718037	1.46631	0.142564	0.533713
PVP01_1462600			48.3808	-1.21452	0.829463	-1.46423	0.143131	0.533713
PVP01_0833100			71.3674	-1.27123	0.865223	-1.46925	0.141766	0.533713
PVP01_1420200			69.311	-1.27443	0.869011	-1.46653	0.142505	0.533713
PVP01_0906200			112.854	-1.37947	0.942099	-1.46425	0.143124	0.533713
PVP01_1141000			20.9609	-1.64392	1.12196	-1.46522	0.142861	0.533713
PVP01_API03500			93.785	-1.65044	1.12396	-1.46841	0.141992	0.533713
PVP01_1122700			402.294	-1.70453	1.16171	-1.46725	0.142307	0.533713
PVP01_0216900			17.2257	-1.77202	1.2091	-1.46557	0.142766	0.533713
PVP01_1467700			16.01	-1.83184	1.24738	-1.46855	0.141954	0.533713
PVP01_0320900			9.8862	-1.866	1.27274	-1.46613	0.142612	0.533713
PVP01_1246000			8.0388	-2.76793	1.89035	-1.46424	0.143129	0.533713
PVP01_1227800			1005.3	0.994802	0.681102	1.46058	0.144132	0.536289
PVP01_0308300			77.8609	-1.12461	0.769847	-1.46083	0.144063	0.536289
PVP01_0917500			18.6512	-2.3674	1.62038	-1.46102	0.144011	0.536289
PVP01_1312700			14.9459	-2.19115	1.5014	-1.45941	0.144453	0.537099
PVP01_0114900			57.9451	1.46249	1.0031	1.45796	0.14485	0.537901
PVP01_0831200			68.3462	-1.10396	0.757402	-1.45757	0.14496	0.537901
PVP01_0925300			47.7596	-1.72396	1.18282	-1.4575	0.144979	0.537901
PVP01_1467300			130.602	-1.04086	0.714466	-1.45684	0.14516	0.538189
PVP01_1134200			78.5998	-1.273	0.87494	-1.45496	0.14568	0.53935
PVP01_0409700			5.16577	-2.28145	1.56805	-1.45496	0.145681	0.53935
PVP01_0302100			19.6253	2.48945	1.71217	1.45397	0.145954	0.539709
PVP01_1208800			25.9789	1.51662	1.04397	1.45275	0.146293	0.539709
PVP01_1440800			326.128	0.866218	0.596336	1.45257	0.146344	0.539709
PVP01_1335100			15.0811	-1.60003	1.10111	-1.4531	0.146197	0.539709
PVP01_1227600			26.1279	-1.69397	1.16537	-1.45359	0.146061	0.539709
PVP01_0406900			13.2857	-2.07749	1.43042	-1.45236	0.1464	0.539709
PVP01_1132200			116.499	-1.00709	0.694124	-1.45088	0.146814	0.540851
PVP01_1231000			40.0675	-1.70209	1.17478	-1.44886	0.147377	0.54254
PVP01_0810400			64.2789	2.31843	1.6039	1.4455	0.148318	0.54446
PVP01_0608600			120.493	1.47271	1.01853	1.44592	0.1482	0.54446
PVP01_0606700			176.834	0.9566	0.661764	1.44553	0.148309	0.54446
PVP01_1011100			7.3838	-2.07181	1.43272	-1.44606	0.148159	0.54446
PVP01_0926100			68.3632	-1.86561	1.29178	-1.44421	0.148679	0.5454
PVP01_1458100			34.448	-1.23178	0.85348	-1.44324	0.148952	0.546016
PVP01_1228700			128.308	0.986089	0.68373	1.44222	0.149241	0.546305
PVP01_0105200			110.456	0.883516	0.612555	1.44235	0.149205	0.546305
PVP01_1201400			1801.72	2.43852	1.69306	1.4403	0.149782	0.546857
PVP01_1108200			51.1879	1.7211	1.19628	1.43871	0.150233	0.546857
PVP01_1312300			592.999	1.22163	0.848947	1.439	0.150151	0.546857
PVP01_0317100			73.8194	-1.21046	0.841067	-1.43919	0.150095	0.546857
PVP01_1320300			28.1028	-1.29777	0.901517	-1.43954	0.149996	0.546857
PVP01_0505400			82.806	-1.31466	0.912642	-1.4405	0.149727	0.546857
PVP01_0906800			30.7047	-1.6853	1.17089	-1.43933	0.150057	0.546857
PVP01_1203400			7.96264	-1.70373	1.18278	-1.44044	0.149743	0.546857
PVP01_1421700			10.4466	-2.53403	1.76197	-1.43818	0.150383	0.547018
PVP01_1460700			176.759	1.17052	0.814769	1.43663	0.150822	0.548234
PVP01_0821100			4.50802	1.90993	1.33278	1.43304	0.151846	0.548748
PVP01_1265900			607.894	1.47594	1.02841	1.43517	0.15124	0.548748
PVP01_1453000			77.5947	1.25593	0.875463	1.43459	0.151404	0.548748
PVP01_1414600			18.1259	1.21485	0.847795	1.43295	0.151872	0.548748
PVP01_0732200			104.117	1.10539	0.771996	1.43186	0.152185	0.548748
PVP01_1410200			94.7122	0.995701	0.694462	1.43377	0.151637	0.548748
PVP01_0811200			25.5534	-1.18386	0.824989	-1.435	0.151288	0.548748
PVP01_1268900			101.203	-1.18417	0.827323	-1.43133	0.152336	0.548748
PVP01_1310400			228.775	-1.40076	0.9778	-1.43257	0.151982	0.548748
PVP01_0415200			46.5013	-1.69625	1.18242	-1.43456	0.151413	0.548748
PVP01_0715200			5.11032	-1.76532	1.23138	-1.43361	0.151684	0.548748
PVP01_0915100			14.5031	-1.86362	1.30159	-1.4318	0.152201	0.548748
PVP01_0517200			17.1306	-2.72997	1.90724	-1.43137	0.152325	0.548748
PVP01_0109200			45.8853	1.21568	0.850529	1.42933	0.15291	0.550312
PVP01_1133400			24.9277	-1.62214	1.1351	-1.42908	0.152982	0.550312
PVP01_1466200			86.2717	-1.48186	1.03836	-1.42711	0.153547	0.551964
PVP01_0607700			29.8681	2.1901	1.53597	1.42588	0.153904	0.552759
PVP01_1248400			57.0217	1.26989	0.890767	1.42561	0.153981	0.552759
PVP01_0730400			104.099	1.15238	0.808848	1.42472	0.154239	0.553303
PVP01_1430700			161.519	1.49862	1.05492	1.4206	0.155434	0.556007
PVP01_0307800			78.7423	1.2738	0.896868	1.42027	0.155528	0.556007
PVP01_1267900			147.688	-1.05844	0.744894	-1.42093	0.155337	0.556007
PVP01_1409300			33.7089	-1.63154	1.14827	-1.42087	0.155355	0.556007
PVP01_1220000			5.33604	-1.77131	1.24715	-1.42028	0.155526	0.556007
PVP01_1302100			30.0982	1.27584	0.898919	1.4193	0.155811	0.556131
PVP01_0207400			388.799	-1.43435	1.01037	-1.41963	0.155716	0.556131
PVP01_0720300			17.0829	-1.55419	1.09523	-1.41905	0.155884	0.556131
PVP01_0933100			16.2765	1.91487	1.35004	1.41838	0.156078	0.556258
PVP01_1431700			37.0575	1.37568	0.970024	1.4182	0.156133	0.556258
PVP01_1212800			574.191	-1.31621	0.928905	-1.41695	0.156498	0.557176
PVP01_0938600			5.67312	2.25741	1.59523	1.4151	0.157039	0.557195
PVP01_1459500			19.8391	1.94744	1.37489	1.41643	0.156649	0.557195
PVP01_1343100			122.207	0.971107	0.686105	1.41539	0.156954	0.557195
PVP01_0408600			49.5992	-1.02969	0.72745	-1.41548	0.156929	0.557195
PVP01_1329600			7.6252	-2.06595	1.45901	-1.41599	0.156777	0.557195
PVP01_0110900			42.8574	-1.08124	0.764539	-1.41424	0.157292	0.557556
PVP01_1304500			191.158	-1.21781	0.861241	-1.41402	0.157356	0.557556
PVP01_1033500			12.7327	2.56493	1.81539	1.41288	0.157691	0.558364
PVP01_0923900			90.4463	1.00393	0.710917	1.41217	0.157901	0.558728
PVP01_0938800			3.5554	6.16846	4.37151	1.41106	0.158227	0.559395
PVP01_1444100			43.6855	-1.36649	0.968597	-1.4108	0.158305	0.559395
PVP01_0610500			191.664	-1.02128	0.725959	-1.4068	0.159487	0.562805
PVP01_0213500			75.4545	-1.20306	0.854985	-1.40711	0.159394	0.562805
PVP01_0819100			233.889	-1.75943	1.25106	-1.40635	0.159619	0.56289
PVP01_0529000			169.115	-1.30387	0.928145	-1.40481	0.160077	0.56412
PVP01_0508300			32.0792	-1.52774	1.08791	-1.40428	0.160235	0.564247
PVP01_1439000			6.76854	-1.97314	1.40541	-1.40396	0.160329	0.564247
PVP01_0423200			21.2473	-1.24096	0.884516	-1.40298	0.160623	0.564582
PVP01_0827300			7.0739	-1.80689	1.28795	-1.40292	0.160642	0.564582
PVP01_1464700			12.4485	1.25585	0.896529	1.40079	0.161276	0.566046
PVP01_1457900			642.998	1.13946	0.813276	1.40108	0.16119	0.566046
PVP01_1339700			37.6557	-1.4506	1.03607	-1.40009	0.161485	0.566397
PVP01_0207300			329.76	1.39068	0.994315	1.39863	0.161923	0.566842
PVP01_1434800			12.3841	-1.90073	1.35869	-1.39895	0.161829	0.566842
PVP01_1307000			6.15959	-1.99696	1.42785	-1.39858	0.161939	0.566842
PVP01_1324000			55.5632	-1.115	0.798409	-1.39653	0.162555	0.568614
PVP01_0010020			6.76696	2.73722	1.96139	1.39555	0.16285	0.569236
PVP01_1007200			74.0075	1.04323	0.748108	1.39449	0.163171	0.569236
PVP01_1225500			244.825	-1.28192	0.919118	-1.39473	0.163098	0.569236
PVP01_0209700			6.00078	-1.88345	1.35001	-1.39513	0.162976	0.569236
PVP01_1205500			203.639	1.14602	0.822701	1.39299	0.163621	0.570043
PVP01_0815100			2.23316	-1.98959	1.42796	-1.39331	0.163526	0.570043
PVP01_1423200			15.2506	2.02838	1.45712	1.39205	0.163909	0.570297
PVP01_1117300			69.5212	-1.1607	0.833816	-1.39203	0.163914	0.570297
PVP01_1331600			33.1372	1.2903	0.927567	1.39106	0.164208	0.570637
PVP01_API04800			2453.53	1.01425	0.729352	1.39062	0.164341	0.570637
PVP01_0930200			10.11	-1.83047	1.31617	-1.39076	0.164299	0.570637
PVP01_1023700			20.4566	2.30154	1.65721	1.38881	0.164891	0.571434
PVP01_0826300			163.158	1.15699	0.833414	1.38825	0.16506	0.571434
PVP01_0707400			28.5197	-1.1685	0.841613	-1.38841	0.165013	0.571434
PVP01_0303100			144.923	-1.49319	1.07468	-1.38943	0.164702	0.571434
PVP01_1335200			76.6806	-2.16329	1.5585	-1.38806	0.16512	0.571434
PVP01_1016300			257.601	-1.20108	0.866478	-1.38616	0.165699	0.573055
PVP01_1236500			14.6411	1.52784	1.1049	1.38278	0.166731	0.573194
PVP01_0513900			18.4964	1.39636	1.00887	1.38409	0.166331	0.573194
PVP01_0119600			15.4106	1.31429	0.948987	1.38494	0.166072	0.573194
PVP01_0420300			22.888	1.18227	0.854061	1.38429	0.16627	0.573194
PVP01_1466900			364.627	-1.15886	0.837952	-1.38297	0.166674	0.573194
PVP01_0946100			95.2202	-1.194	0.863308	-1.38306	0.166648	0.573194
PVP01_1025500			116.244	-1.21966	0.881526	-1.38358	0.166486	0.573194
PVP01_1012500			13.0795	-1.85184	1.33878	-1.38323	0.166593	0.573194
PVP01_1260600			2.46417	-1.99534	1.44058	-1.3851	0.166023	0.573194
PVP01_0913200			3.26271	-1.75347	1.2694	-1.38133	0.167177	0.574346
PVP01_1006400			48.5474	2.20142	1.59568	1.37962	0.167705	0.574953
PVP01_1112900			221.1	-1.12442	0.814919	-1.37979	0.167651	0.574953
PVP01_0823200			36.3391	-1.17117	0.84931	-1.37896	0.167907	0.574953
PVP01_0304400			22.2092	-1.28257	0.929959	-1.37917	0.167843	0.574953
PVP01_1220900			27.0757	-1.66861	1.20918	-1.37996	0.1676	0.574953
PVP01_0927700			146.383	1.03831	0.753809	1.37742	0.168383	0.575278
PVP01_1346200			266.549	-1.06852	0.775589	-1.37769	0.168299	0.575278
PVP01_1136200			148.718	-1.14943	0.834074	-1.37809	0.168174	0.575278
PVP01_0712400			26.3319	-1.55139	1.12647	-1.37722	0.168444	0.575278
PVP01_1315700			150.543	1.21971	0.887064	1.375	0.169132	0.576289
PVP01_0823900			154.077	1.05114	0.764353	1.3752	0.16907	0.576289
PVP01_0112500			87.4866	-1.09129	0.793761	-1.37483	0.169184	0.576289
PVP01_0937700			12.8614	-1.45851	1.06061	-1.37517	0.16908	0.576289
PVP01_1100800			3.16895	6.00752	4.37646	1.37269	0.169849	0.576501
PVP01_0929400			34.1511	1.63963	1.19428	1.3729	0.169782	0.576501
PVP01_1032500			20.3745	1.62148	1.18042	1.37365	0.169551	0.576501
PVP01_1425400			13.7163	-1.56323	1.13897	-1.37249	0.169911	0.576501
PVP01_0943900			31.5809	-1.62955	1.18664	-1.37325	0.169674	0.576501
PVP01_1315900			5.05748	-1.75438	1.27676	-1.37409	0.169414	0.576501
PVP01_0211700			22.1574	1.40028	1.02094	1.37156	0.170201	0.576944
PVP01_1226900			33.4515	1.01257	0.73862	1.37089	0.170409	0.576944
PVP01_0943400			33.5582	-1.27157	0.927689	-1.37069	0.170472	0.576944
PVP01_1009900			249.154	-1.68684	1.23069	-1.37064	0.170486	0.576944
PVP01_0912100			19.7433	-1.18853	0.867388	-1.37024	0.170613	0.576997
PVP01_0316300			87.2641	-0.940485	0.687028	-1.36892	0.171025	0.578015
PVP01_0504100			3.48524	-2.18949	1.60116	-1.36744	0.171488	0.579205
PVP01_1433800			14.6345	1.7988	1.31595	1.36692	0.171651	0.579378
PVP01_0410900			160.349	-1.04832	0.767448	-1.36599	0.171943	0.579614
PVP01_1022200			1197.88	-1.2206	0.893569	-1.36598	0.171944	0.579614
PVP01_0413000			83.3207	0.955125	0.700065	1.36434	0.172461	0.58098
PVP01_0822100			75.5917	1.61143	1.18208	1.36321	0.172815	0.581081
PVP01_0106800			11.8374	1.48664	1.09085	1.36282	0.172938	0.581081
PVP01_0406800			89.5005	-0.962736	0.706342	-1.36299	0.172886	0.581081
PVP01_0613200			115.721	-1.15308	0.845693	-1.36348	0.172732	0.581081
PVP01_0424300			2.52985	2.4047	1.7662	1.36151	0.173353	0.581659
PVP01_1333000			23.9255	1.31116	0.963727	1.36051	0.17367	0.581659
PVP01_0519300			120.833	-1.1251	0.826312	-1.36159	0.173329	0.581659
PVP01_0109100			642.922	-1.23568	0.908163	-1.36063	0.17363	0.581659
PVP01_0415400			57.8788	-1.56265	1.14806	-1.36113	0.173472	0.581659
PVP01_1417700			82.0758	-0.903704	0.664505	-1.35997	0.17384	0.581856
PVP01_0106200			216.661	-0.975592	0.717603	-1.35951	0.173984	0.581961
PVP01_1458500			554.178	0.968557	0.712933	1.35855	0.174289	0.582232
PVP01_0938400			28.0619	-1.12604	0.828852	-1.35856	0.174286	0.582232
PVP01_0410700			19.8911	-1.26724	0.933166	-1.358	0.174464	0.582445
PVP01_0308600			62.2107	-1.40825	1.03742	-1.35745	0.174639	0.582652
PVP01_1218300			38.8846	1.11191	0.819336	1.35709	0.174754	0.582663
PVP01_0937200			297.672	-0.850316	0.626749	-1.35671	0.174874	0.582688
PVP01_1005700			68.9993	-1.08988	0.804085	-1.35543	0.175281	0.583671
PVP01_0828400			86.1466	1.08473	0.802624	1.35148	0.176543	0.587497
PVP01_0510500			88.1974	-0.937685	0.694571	-1.35002	0.17701	0.588392
PVP01_0529300			450.296	-0.977509	0.724118	-1.34993	0.177038	0.588392
PVP01_1249600			308.462	-0.815574	0.604733	-1.34865	0.177449	0.58938
PVP01_1458800			52.3291	1.3075	0.969983	1.34796	0.177672	0.589744
PVP01_0821500			58.7645	-0.918496	0.68193	-1.34691	0.17801	0.590489
PVP01_0524700			24.4741	1.8729	1.39361	1.34392	0.178974	0.5918
PVP01_0831100			152.8	1.35206	1.00502	1.34531	0.178526	0.5918
PVP01_0944700			189.64	-1.01244	0.753216	-1.34415	0.178898	0.5918
PVP01_0917700			63.9021	-1.2159	0.904599	-1.34413	0.178906	0.5918
PVP01_1030100			30.1816	-1.58088	1.17592	-1.34437	0.178828	0.5918
PVP01_0302600			69.085	-1.04242	0.77679	-1.34196	0.179609	0.592924
PVP01_1202700			23.8073	-1.17931	0.878637	-1.3422	0.179531	0.592924
PVP01_0609200			31.8159	-1.24333	0.926607	-1.34181	0.179657	0.592924
PVP01_1214000			4.03938	1.72561	1.28697	1.34083	0.179977	0.592925
PVP01_1133500			486.541	-1.11663	0.832533	-1.34124	0.179841	0.592925
PVP01_1262700			15.5558	-1.73541	1.29469	-1.34041	0.180113	0.592925
PVP01_0811700			2.48137	-2.22467	1.6594	-1.34065	0.180035	0.592925
PVP01_1233500			23.322	1.48436	1.10783	1.33989	0.180281	0.593102
PVP01_0825700			56.5146	1.08696	0.812317	1.3381	0.180865	0.594647
PVP01_1311100			617.251	-1.12264	0.839716	-1.33692	0.181248	0.595528
PVP01_1030200			129.348	-1.08354	0.810977	-1.33609	0.181521	0.59605
PVP01_1309600			11.708	1.17642	0.880813	1.33561	0.181678	0.59619
PVP01_0948100			11.4484	-2.60832	1.95475	-1.33435	0.182088	0.597156
PVP01_1472300			2.29024	2.75977	2.06947	1.33356	0.182348	0.597407
PVP01_1441100			9.05987	1.34303	1.00721	1.33342	0.182394	0.597407
PVP01_0529700			34.5454	-1.19583	0.897274	-1.33273	0.182619	0.597768
PVP01_0116900			34.1717	-1.18523	0.889568	-1.33237	0.182738	0.59778
PVP01_1338100			14.6212	1.73678	1.3039	1.33198	0.182865	0.597821
PVP01_0002720			2.78249	5.82618	4.38269	1.32936	0.183728	0.59876
PVP01_0213200			12.3723	1.19188	0.895655	1.33073	0.183277	0.59876
PVP01_1203300			477.015	-1.1139	0.837422	-1.33016	0.183467	0.59876
PVP01_1238300			6.34157	-1.5555	1.17011	-1.32936	0.183729	0.59876
PVP01_0531700			16.4268	-1.74425	1.31149	-1.32997	0.183527	0.59876
PVP01_0931500			298.958	1.09346	0.822788	1.32898	0.183856	0.598799
PVP01_0209800			578.745	0.932925	0.702868	1.32731	0.184406	0.59957
PVP01_0513500			188.267	-0.874505	0.658983	-1.32705	0.184492	0.59957
PVP01_1111100			63.3312	-1.15947	0.873385	-1.32756	0.184323	0.59957
PVP01_0936800			11.961	-1.73207	1.30573	-1.32651	0.184669	0.59957
PVP01_0622100			9.02629	-1.87617	1.41429	-1.32658	0.184647	0.59957
PVP01_1412500			52.7591	-1.35742	1.02443	-1.32505	0.185155	0.600767
PVP01_1255000			40.6278	-1.79566	1.35552	-1.3247	0.185269	0.600767
PVP01_0208700			63.3665	-1.22935	0.929049	-1.32324	0.185756	0.601596
PVP01_0930900			22.2229	-1.51118	1.14189	-1.32339	0.185704	0.601596
PVP01_0301500			19.2888	1.38934	1.05064	1.32237	0.186044	0.601911
PVP01_0905100			43.779	-1.05532	0.798122	-1.32225	0.186085	0.601911
PVP01_1444400			268.723	-0.942395	0.713362	-1.32106	0.186481	0.602068
PVP01_0109900			48.5831	-1.12093	0.848086	-1.32172	0.186263	0.602068
PVP01_0419600			53.3031	-1.34855	1.02062	-1.3213	0.186401	0.602068
PVP01_0002390			2.7052	5.78704	4.38413	1.32	0.186836	0.602463
PVP01_1144800			405.71	-1.59517	1.20845	-1.32001	0.186832	0.602463
PVP01_0920500			253.094	-1.57478	1.1934	-1.31957	0.186979	0.602552
PVP01_MIT03200			168.342	-1.5223	1.15418	-1.31895	0.187185	0.602842
PVP01_0923800			59.7076	1.10364	0.837452	1.31786	0.18755	0.603288
PVP01_1003900			128.131	1.01032	0.766643	1.31784	0.187556	0.603288
PVP01_1253400			72.3241	-1.06351	0.80797	-1.31627	0.188084	0.604365
PVP01_0708300			13.0154	-1.94789	1.47999	-1.31615	0.188123	0.604365
PVP01_0615600			69.6021	-1.1637	0.884817	-1.31518	0.188449	0.604619
PVP01_1418200			26.7944	-1.21204	0.921571	-1.31519	0.188446	0.604619
PVP01_1413400			18.0744	-1.53126	1.16456	-1.31488	0.188551	0.604619
PVP01_0731600			16.6083	1.22533	0.93329	1.31292	0.189211	0.605988
PVP01_1264300			60.0904	1.20047	0.914205	1.31313	0.18914	0.605988
PVP01_1236900			40.773	1.40886	1.0736	1.31228	0.189427	0.606306
PVP01_1271500			135.769	1.49309	1.13829	1.31169	0.189623	0.606561
PVP01_1009700			3.61386	1.80176	1.37664	1.30881	0.190597	0.608554
PVP01_0306600			109.222	1.19154	0.910165	1.30915	0.190484	0.608554
PVP01_1262600			2.39921	-2.17494	1.66111	-1.30933	0.190423	0.608554
PVP01_0826200			52.3899	-1.25152	0.958248	-1.30605	0.191536	0.611176
PVP01_0606600			59.3432	-1.01806	0.780035	-1.30515	0.191841	0.611399
PVP01_0411700			11.8403	-1.50125	1.14996	-1.30548	0.191729	0.611399
PVP01_0303000			45.6473	-1.24616	0.955095	-1.30475	0.191978	0.61146
PVP01_1201100			2.55062	5.70536	4.38725	1.30044	0.19345	0.61165
PVP01_0003130			2.55062	5.70536	4.38725	1.30044	0.19345	0.61165
PVP01_0836700			81.3461	0.979543	0.751558	1.30335	0.192455	0.61165
PVP01_0510100			131.894	0.836587	0.642349	1.30239	0.192784	0.61165
PVP01_1254400			129.083	-0.949638	0.728228	-1.30404	0.19222	0.61165
PVP01_0614500			95.536	-0.972375	0.746418	-1.30272	0.19267	0.61165
PVP01_1012900			29.6638	-1.0554	0.810276	-1.30251	0.192741	0.61165
PVP01_1407800			20.1816	-1.10778	0.851244	-1.30136	0.193134	0.61165
PVP01_1105600			117.957	-1.29253	0.992929	-1.30173	0.193008	0.61165
PVP01_1135800			83.1145	-1.39276	1.0708	-1.30067	0.193371	0.61165
PVP01_0728900			242.838	-1.83028	1.40473	-1.30294	0.192596	0.61165
PVP01_0800700			11.5391	-3.03354	2.33057	-1.30163	0.193042	0.61165
PVP01_0726000			15.2041	2.30875	1.77659	1.29954	0.193758	0.612251
PVP01_0918900			195.462	-1.18515	0.912909	-1.29821	0.194215	0.61327
PVP01_1269200			18.3281	-1.62652	1.25317	-1.29792	0.194316	0.61327
PVP01_0944100			50.4265	-0.987014	0.761232	-1.2966	0.194769	0.614325
PVP01_1456500			27.1283	1.17059	0.903199	1.29604	0.19496	0.614556
PVP01_0604200			688.625	-1.5292	1.18054	-1.29534	0.195204	0.61458
PVP01_1143000			60.7227	-1.65005	1.27382	-1.29535	0.195199	0.61458
PVP01_1323500			123.549	0.994515	0.769221	1.29289	0.19605	0.616524
PVP01_1123300			12.0152	-1.46316	1.13172	-1.29286	0.196059	0.616524
PVP01_0005370			2.47332	5.66269	4.38895	1.29022	0.196976	0.618284
PVP01_0912800			8.32615	1.6391	1.27026	1.29036	0.196926	0.618284
PVP01_0703600			100.405	1.02058	0.790633	1.29083	0.196761	0.618284
PVP01_0504800			5.3062	2.02301	1.56928	1.28914	0.197351	0.618343
PVP01_0010840			2.40571	2.00774	1.55721	1.28932	0.197286	0.618343
PVP01_1232600			79.8437	0.925766	0.717781	1.28976	0.197134	0.618343
PVP01_0402000			2.59452	5.59936	4.39155	1.27503	0.202299	0.618558
PVP01_0004510			2.59452	5.59936	4.39155	1.27503	0.202299	0.618558
PVP01_0005460			2.59452	5.59936	4.39155	1.27503	0.202299	0.618558
PVP01_0006620			2.59452	5.59936	4.39155	1.27503	0.202299	0.618558
PVP01_0006820			2.59452	5.59936	4.39155	1.27503	0.202299	0.618558
PVP01_0007420			2.59452	5.59936	4.39155	1.27503	0.202299	0.618558
PVP01_0007850			2.59452	5.59936	4.39155	1.27503	0.202299	0.618558
PVP01_0008840			2.59452	5.59936	4.39155	1.27503	0.202299	0.618558
PVP01_0009150			2.59452	5.59936	4.39155	1.27503	0.202299	0.618558
PVP01_0509200			4.35749	2.32513	1.81775	1.27913	0.200853	0.618558
PVP01_0522900			19.5911	2.25735	1.77038	1.27507	0.202285	0.618558
PVP01_1345200			17.8164	2.18102	1.69955	1.28329	0.19939	0.618558
PVP01_0421200			9.59526	1.811	1.41108	1.28341	0.199348	0.618558
PVP01_1468600			37.7946	1.37132	1.06852	1.28339	0.199357	0.618558
PVP01_0529400			752.207	1.25768	0.976859	1.28747	0.197931	0.618558
PVP01_0932800			101.724	-0.885491	0.692181	-1.27928	0.2008	0.618558
PVP01_1267700			56.3582	-0.93903	0.730525	-1.28542	0.198646	0.618558
PVP01_0515400			6587.24	-0.94337	0.738507	-1.2774	0.201461	0.618558
PVP01_1107400			30.0959	-1.09167	0.847281	-1.28843	0.197595	0.618558
PVP01_0620000			123.368	-1.11428	0.867286	-1.28479	0.198867	0.618558
PVP01_0913100			34.3489	-1.15783	0.901938	-1.28372	0.199242	0.618558
PVP01_1466100			15.2549	-1.15828	0.904793	-1.28016	0.200488	0.618558
PVP01_0716700			55.1282	-1.17288	0.915245	-1.28149	0.200021	0.618558
PVP01_0108100			54.8122	-1.20351	0.936019	-1.28578	0.198521	0.618558
PVP01_0104100			437.886	-1.20431	0.94129	-1.27943	0.200747	0.618558
PVP01_0318700			67.5557	-1.32015	1.03392	-1.27684	0.201657	0.618558
PVP01_1253600			103.348	-1.32547	1.03252	-1.28372	0.19924	0.618558
PVP01_0209900			53.7995	-1.32552	1.03588	-1.27961	0.200684	0.618558
PVP01_1250700			29.7365	-1.36564	1.06967	-1.2767	0.201708	0.618558
PVP01_1315100			13.1682	-1.44251	1.12196	-1.28571	0.198546	0.618558
PVP01_0310400			14.9976	-1.45817	1.13371	-1.28619	0.198376	0.618558
PVP01_0908300			19.4205	-1.46075	1.14023	-1.2811	0.200157	0.618558
PVP01_0716100			11.4263	-1.49232	1.16516	-1.28078	0.200271	0.618558
PVP01_0507700			27.4989	-1.53366	1.19823	-1.27994	0.200567	0.618558
PVP01_1256400			17.2311	-1.53406	1.20188	-1.27638	0.20182	0.618558
PVP01_1217800			33.2909	-1.56575	1.22223	-1.28106	0.200173	0.618558
PVP01_1136700			7.30717	-1.69239	1.31467	-1.28732	0.197984	0.618558
PVP01_0829500			14.042	-1.7043	1.32457	-1.28668	0.198205	0.618558
PVP01_1428700			45.8289	-1.9314	1.51335	-1.27624	0.201871	0.618558
PVP01_1446800			1466.79	-2.18092	1.69743	-1.28484	0.198849	0.618558
PVP01_0700900			7.94201	-2.41431	1.87542	-1.28735	0.197974	0.618558
PVP01_0103300			6.00091	1.86355	1.4636	1.27327	0.202923	0.618648
PVP01_1311300			48.6352	-0.92857	0.7291	-1.27358	0.202811	0.618648
PVP01_1247800			38.7915	-1.05981	0.832344	-1.27328	0.202917	0.618648
PVP01_0918300			91.4296	-1.06427	0.835313	-1.27409	0.202631	0.618648
PVP01_1211300			27.6625	-1.07669	0.844904	-1.27433	0.202545	0.618648
PVP01_0204500			115.063	-1.02574	0.805858	-1.27286	0.203069	0.618729
PVP01_1405600			8.58944	-1.4673	1.15386	-1.27164	0.203499	0.619678
PVP01_0004290			53.7683	2.12676	1.67346	1.27088	0.203772	0.620051
PVP01_0205900			52.823	-1.16104	0.913752	-1.27063	0.203861	0.620051
PVP01_1115900			372.256	1.2334	0.971698	1.26932	0.204326	0.620426
PVP01_1109600			441.522	-0.851547	0.670577	-1.26987	0.20413	0.620426
PVP01_1237800			4.28778	-1.69733	1.33724	-1.26928	0.204342	0.620426
PVP01_0721300			406.9	-1.22259	0.964055	-1.26818	0.204735	0.621255
PVP01_0504200			169.766	1.97324	1.55695	1.26738	0.205021	0.621761
PVP01_0534500			6.3288	2.40504	1.90239	1.26422	0.20615	0.622455
PVP01_1219900			319.189	1.42364	1.12609	1.26424	0.206145	0.622455
PVP01_0304000			135.264	1.19316	0.943527	1.26458	0.206024	0.622455
PVP01_1337900			104.964	0.974763	0.772236	1.26226	0.206855	0.622455
PVP01_0422100			353.755	0.929863	0.736781	1.26206	0.206926	0.622455
PVP01_1221900			82.9924	-1.05513	0.83376	-1.26551	0.205689	0.622455
PVP01_1438000			63.7219	-1.11245	0.881256	-1.26235	0.206823	0.622455
PVP01_1326300			456.442	-1.14866	0.90952	-1.26293	0.206615	0.622455
PVP01_0826100			52.9639	-1.21124	0.958956	-1.26308	0.206562	0.622455
PVP01_0415500			35.4987	-1.24708	0.986991	-1.26351	0.206405	0.622455
PVP01_1217700			31.3242	-1.26937	1.00477	-1.26335	0.206465	0.622455
PVP01_1217300			43.2107	-1.50381	1.18934	-1.26441	0.206084	0.622455
PVP01_0622400			41.0858	-1.69271	1.33787	-1.26523	0.205789	0.622455
PVP01_0532400			3.63621	-2.66772	2.10729	-1.26595	0.205531	0.622455
PVP01_0920900			78.8508	-0.972989	0.771201	-1.26165	0.207073	0.622537
PVP01_1030400			22.5216	-1.1549	0.915688	-1.26124	0.207224	0.622631
PVP01_1138900			121.1	-1.00066	0.794268	-1.25986	0.207722	0.623559
PVP01_0308800			16.3909	-1.37355	1.09037	-1.25971	0.207773	0.623559
PVP01_0303600			44.2305	-1.07015	0.850033	-1.25895	0.20805	0.623669
PVP01_0936100			17.2145	-1.50761	1.19738	-1.25909	0.207997	0.623669
PVP01_1469200			103.068	-1.58593	1.26313	-1.25556	0.209277	0.626986
PVP01_1211000			290.716	0.921132	0.734132	1.25472	0.209579	0.62717
PVP01_0934800			246.136	-1.00639	0.802033	-1.2548	0.209552	0.62717
PVP01_1310700			17.0534	-1.30005	1.03663	-1.25411	0.2098	0.627469
PVP01_0934500			36.9445	-0.98048	0.782593	-1.25286	0.210257	0.628473
PVP01_0707300			62.4405	-0.929176	0.742525	-1.25137	0.210798	0.62973
PVP01_0615300			9.5659	-1.78147	1.42409	-1.25096	0.21095	0.629821
PVP01_1201300			10.1119	1.69094	1.35213	1.25057	0.211091	0.629881
PVP01_1117800			48.3396	-1.31739	1.05408	-1.24979	0.211375	0.630365
PVP01_1308200			24.8773	-1.52075	1.21727	-1.24931	0.211551	0.630529
PVP01_1206400			823.307	1.33317	1.06809	1.24817	0.211967	0.631109
PVP01_0935900			784.495	1.07773	0.863716	1.24778	0.21211	0.631109
PVP01_0819200			85.4139	-0.86682	0.694543	-1.24804	0.212015	0.631109
PVP01_0907700			34.3219	1.41856	1.13738	1.24722	0.212317	0.631363
PVP01_1454500			15.6862	-1.7346	1.39136	-1.2467	0.212509	0.631574
PVP01_0315600			507.196	-0.988685	0.79369	-1.24568	0.212881	0.632318
PVP01_0321000			14.8363	1.45877	1.17246	1.2442	0.213427	0.633511
PVP01_0701800			284.966	-1.04409	0.839352	-1.24393	0.213526	0.633511
PVP01_1401800			245.522	1.89619	1.52563	1.24288	0.21391	0.634287
PVP01_1468200			18.1971	1.21678	0.980747	1.24067	0.214729	0.634637
PVP01_1012800			19.8568	1.19515	0.963418	1.24054	0.214777	0.634637
PVP01_0909500			116.591	-0.799923	0.644423	-1.2413	0.214495	0.634637
PVP01_1256600			146.132	-0.855306	0.689623	-1.24025	0.214883	0.634637
PVP01_0907100			31.21	-1.11423	0.897932	-1.24088	0.21465	0.634637
PVP01_1204700			73.2935	-1.13318	0.912819	-1.2414	0.214456	0.634637
PVP01_1238100			371.195	-1.31956	1.06391	-1.24029	0.214867	0.634637
PVP01_0946000			5.14495	-1.62673	1.31203	-1.23986	0.215027	0.634703
PVP01_1444600			45.7464	-1.05984	0.85546	-1.23892	0.215376	0.63537
PVP01_0805000			3.30025	1.74664	1.4181	1.23168	0.218067	0.636816
PVP01_1250300			9.19492	1.46026	1.18263	1.23476	0.21692	0.636816
PVP01_0706900			35.4156	1.39604	1.12978	1.23567	0.21658	0.636816
PVP01_0621100			30.7446	1.19557	0.970781	1.23156	0.218114	0.636816
PVP01_0832500			263.165	0.804268	0.653283	1.23112	0.218279	0.636816
PVP01_0507800			237.601	-0.783202	0.636042	-1.23137	0.218186	0.636816
PVP01_1310600			222.999	-0.814774	0.661377	-1.23193	0.217973	0.636816
PVP01_1406800			45.9386	-0.973485	0.790066	-1.23216	0.217891	0.636816
PVP01_1342600			149.261	-1.01904	0.825021	-1.23517	0.216766	0.636816
PVP01_0819300			231.141	-1.03054	0.836819	-1.2315	0.218138	0.636816
PVP01_0803900			216.901	-1.05531	0.855392	-1.23371	0.217311	0.636816
PVP01_0117900			331.372	-1.06142	0.859792	-1.23451	0.217015	0.636816
PVP01_0419200			359.708	-1.06736	0.864434	-1.23475	0.216924	0.636816
PVP01_0409400			48.0798	-1.08179	0.875189	-1.23606	0.216436	0.636816
PVP01_0909400			177.209	-1.17659	0.952395	-1.23541	0.21668	0.636816
PVP01_0111400			254.237	-1.21365	0.982265	-1.23556	0.216622	0.636816
PVP01_0608000			26.7705	-1.40276	1.13952	-1.23102	0.218316	0.636816
PVP01_1265400			23.4253	-1.40802	1.14362	-1.2312	0.218248	0.636816
PVP01_1342400			21.8458	-1.56443	1.26817	-1.23362	0.217345	0.636816
PVP01_0910100			2.73999	-1.73787	1.4074	-1.23481	0.2169	0.636816
PVP01_0003360			3.31535	1.84709	1.50185	1.22988	0.218743	0.637166
PVP01_1011700			8.57265	1.57232	1.28037	1.22802	0.219439	0.637166
PVP01_1226400			108.654	1.3315	1.08546	1.22666	0.21995	0.637166
PVP01_0306200			32.1342	1.18274	0.962336	1.22903	0.21906	0.637166
PVP01_1427500			61.7313	0.808839	0.659419	1.22659	0.219975	0.637166
PVP01_0113200			86.8149	-0.868634	0.708251	-1.22645	0.220029	0.637166
PVP01_0911000			104.455	-0.953648	0.776985	-1.22737	0.219684	0.637166
PVP01_0622000			30.3953	-1.14274	0.931103	-1.2273	0.219711	0.637166
PVP01_1010700			19.2223	-1.41036	1.14921	-1.22724	0.219731	0.637166
PVP01_1241700			12.9386	-1.41441	1.15042	-1.22947	0.218894	0.637166
PVP01_1241600			8.22464	-1.58953	1.2953	-1.22715	0.219765	0.637166
PVP01_1234000			20.4581	-1.72724	1.40779	-1.22692	0.219853	0.637166
PVP01_1307800			8.23203	-1.9442	1.58338	-1.22788	0.219492	0.637166
PVP01_0310700			75.1619	-1.06521	0.869329	-1.22532	0.220454	0.637518
PVP01_0710100			16.2649	-1.68956	1.37906	-1.22515	0.220519	0.637518
PVP01_0624500			2.19579	-2.04577	1.66957	-1.22533	0.22045	0.637518
PVP01_1144500			37.7371	1.18184	0.965822	1.22366	0.221079	0.638254
PVP01_0730800			252.931	-0.822925	0.672316	-1.22402	0.220946	0.638254
PVP01_1450900			26.3356	-1.40472	1.14812	-1.2235	0.221142	0.638254
PVP01_1302600			60.7938	1.26059	1.03146	1.22214	0.221653	0.638522
PVP01_0813300			210.811	0.998285	0.817177	1.22163	0.221849	0.638522
PVP01_1311800			71.3619	0.948072	0.775448	1.22261	0.221476	0.638522
PVP01_0615900			45.6616	-1.04815	0.857759	-1.22197	0.22172	0.638522
PVP01_1006700			5.06356	-2.27445	1.86172	-1.22169	0.221823	0.638522
PVP01_0529500			165.115	1.20987	0.990769	1.22114	0.222033	0.638698
PVP01_0926000			302.75	-1.14792	0.940361	-1.22072	0.222191	0.6388
PVP01_1121100			44.9353	1.46177	1.19859	1.21958	0.222623	0.639409
PVP01_0815400			92.4007	-0.952302	0.780886	-1.21951	0.222649	0.639409
PVP01_0314500			20.5962	1.25542	1.03083	1.21787	0.223274	0.640848
PVP01_0422600			2545.54	0.983815	0.808152	1.21736	0.223466	0.641046
PVP01_1332500			113.332	1.63802	1.34815	1.21501	0.224362	0.641845
PVP01_0608800			66.9379	1.10507	0.909052	1.21562	0.224128	0.641845
PVP01_0307600			42.4397	-1.05142	0.864436	-1.21631	0.223868	0.641845
PVP01_0730200			9.74994	-1.4462	1.19001	-1.21529	0.224257	0.641845
PVP01_1307500			18.2777	-1.79806	1.47919	-1.21557	0.224149	0.641845
PVP01_0801000			601.693	1.31641	1.08562	1.21259	0.225288	0.642014
PVP01_0706600			30.9979	1.28008	1.05565	1.21261	0.225281	0.642014
PVP01_1402100			200.843	1.20841	0.996567	1.21258	0.225292	0.642014
PVP01_1344300			168.34	0.794572	0.655038	1.21302	0.225123	0.642014
PVP01_1122800			48.6356	-0.893682	0.737163	-1.21233	0.225387	0.642014
PVP01_0941500			75.804	-1.13876	0.938968	-1.21278	0.225214	0.642014
PVP01_0816800			92.0094	-1.40451	1.15837	-1.21249	0.225325	0.642014
PVP01_0820100			8.35513	-1.92001	1.58381	-1.21227	0.225409	0.642014
PVP01_0806500			744.787	-0.920124	0.759257	-1.21187	0.22556	0.642094
PVP01_1241400			10.3817	1.43436	1.18444	1.211	0.225894	0.642589
PVP01_0302400			74.1144	1.178	0.972931	1.21077	0.225982	0.642589
PVP01_1255500			7.13114	-1.73944	1.43705	-1.21042	0.226116	0.64262
PVP01_1117700			21.848	1.06197	0.878997	1.20816	0.226985	0.644169
PVP01_1314100			9.15036	-1.41111	1.1681	-1.20804	0.227033	0.644169
PVP01_0926700			216.806	-1.46342	1.21106	-1.20838	0.226902	0.644169
PVP01_0609500			16.8136	1.24224	1.02928	1.2069	0.227469	0.644703
PVP01_0610600			55.8604	1.0844	0.898279	1.2072	0.227356	0.644703
PVP01_0711900			11.3567	1.84663	1.53052	1.20654	0.22761	0.644751
PVP01_0831800			5.93995	1.50865	1.25202	1.20498	0.228213	0.645754
PVP01_1317800			66.9071	0.978499	0.811944	1.20513	0.228153	0.645754
PVP01_0730600			27.9413	1.41819	1.17748	1.20443	0.228423	0.645998
PVP01_0111300			19.9645	-1.08451	0.900838	-1.20389	0.228631	0.646235
PVP01_1114300			3.30558	1.8513	1.53886	1.20304	0.228962	0.646817
PVP01_1145000			18.4951	1.48902	1.23845	1.20232	0.22924	0.64725
PVP01_0513800			64.0441	-0.885314	0.737329	-1.2007	0.229866	0.647963
PVP01_0416100			24.9963	-0.966602	0.804942	-1.20083	0.229816	0.647963
PVP01_0922800			7.17721	-2.25901	1.88128	-1.20078	0.229835	0.647963
PVP01_0819800			116.333	1.60026	1.33451	1.19914	0.230473	0.648534
PVP01_1207900			12.7625	1.4817	1.2361	1.19869	0.230648	0.648534
PVP01_1418600			11.266	1.29984	1.08363	1.19952	0.230324	0.648534
PVP01_0315200			112.389	1.00557	0.83897	1.19858	0.230693	0.648534
PVP01_1451600			159.929	-1.08634	0.905487	-1.19973	0.230246	0.648534
PVP01_1419400			3.16079	1.89522	1.58541	1.19541	0.231926	0.649918
PVP01_0612000			14.7819	1.57378	1.31603	1.19585	0.231754	0.649918
PVP01_1218000			67.6761	1.40563	1.17806	1.19317	0.232802	0.649918
PVP01_0725600			165.522	1.04273	0.874634	1.19219	0.233185	0.649918
PVP01_0828100			267.23	0.722204	0.605657	1.19243	0.233092	0.649918
PVP01_1030600			108.265	-0.803408	0.671328	-1.19674	0.231407	0.649918
PVP01_1238000			91.6643	-0.807282	0.674796	-1.19634	0.231566	0.649918
PVP01_0940500			72.8335	-0.8659	0.725393	-1.1937	0.232596	0.649918
PVP01_0932100			46.2393	-1.03497	0.866986	-1.19375	0.232576	0.649918
PVP01_0808600			68.893	-1.15279	0.96648	-1.19278	0.232957	0.649918
PVP01_0614400			51.8719	-1.24704	1.04516	-1.19315	0.23281	0.649918
PVP01_1452700			33.6431	-1.30269	1.09181	-1.19314	0.232814	0.649918
PVP01_1020400			11.4804	-1.32544	1.11048	-1.19358	0.232642	0.649918
PVP01_1314800			17.2483	-1.3499	1.1281	-1.19661	0.231458	0.649918
PVP01_0616900			11.894	-1.39453	1.16664	-1.19533	0.231957	0.649918
PVP01_1334300			15.2094	-1.4024	1.17373	-1.19482	0.232157	0.649918
PVP01_0514800			21.3791	1.55784	1.30826	1.19077	0.233744	0.65012
PVP01_0913400			23.9969	1.17956	0.992196	1.18884	0.234503	0.65012
PVP01_0522700			784.675	1.17216	0.985978	1.18882	0.234509	0.65012
PVP01_0807500			47.6628	1.12151	0.942906	1.18941	0.234277	0.65012
PVP01_0936600			25.1764	1.07087	0.900081	1.18975	0.234145	0.65012
PVP01_1402800			445.134	-0.980072	0.823494	-1.19014	0.233992	0.65012
PVP01_0205200			42.9683	-1.08867	0.914703	-1.19019	0.233971	0.65012
PVP01_0906100			49.2037	-1.34517	1.12893	-1.19155	0.233439	0.65012
PVP01_1107100			11.6449	-1.51375	1.27195	-1.19009	0.234009	0.65012
PVP01_0417700			65.4797	-1.86845	1.5695	-1.19047	0.23386	0.65012
PVP01_1412400			22.5932	-1.57332	1.32453	-1.18783	0.234902	0.650863
PVP01_1142000			315.348	-1.09984	0.92729	-1.18608	0.23559	0.652423
PVP01_1326000			56.1685	-1.10973	0.935904	-1.18573	0.23573	0.652443
PVP01_0414300			11.9629	-2.49639	2.1059	-1.18543	0.235849	0.652443
PVP01_0010510			16.2635	5.01093	4.23272	1.18385	0.23647	0.653022
PVP01_0933600			41.7848	1.07598	0.909294	1.18331	0.236686	0.653022
PVP01_0717500			64.5519	-0.877808	0.741729	-1.18346	0.236626	0.653022
PVP01_0941400			576.833	-0.916015	0.773741	-1.18388	0.236461	0.653022
PVP01_1329200			103.113	-1.14923	0.971054	-1.18349	0.236616	0.653022
PVP01_0419800			58.3374	1.07555	0.911089	1.18051	0.237796	0.655711
PVP01_0530900			209.568	-1.23302	1.04474	-1.18022	0.237913	0.655711
PVP01_0931000			41.6976	-0.972566	0.824417	-1.1797	0.238119	0.655932
PVP01_0600700			7.04642	1.9968	1.69407	1.1787	0.238517	0.656333
PVP01_1471200			48.3382	1.12702	0.956006	1.17889	0.238443	0.656333
PVP01_0816200			14.5106	1.711	1.45271	1.1778	0.238876	0.656879
PVP01_1259500			2.58512	1.64436	1.39678	1.17725	0.239098	0.656879
PVP01_1024100			45.5354	-0.845631	0.718696	-1.17662	0.239348	0.656879
PVP01_0807800			552.642	-0.960288	0.816135	-1.17663	0.239343	0.656879
PVP01_1343500			50.7976	-0.970304	0.824345	-1.17706	0.239171	0.656879
PVP01_1403800			12.6574	-1.37982	1.17352	-1.17579	0.239679	0.657441
PVP01_API05500			2496.41	1.00953	0.859378	1.17472	0.240106	0.658265
PVP01_1345100			38.3864	1.50784	1.28451	1.17387	0.240449	0.658858
PVP01_1328100			44.3962	1.25206	1.06715	1.17328	0.240684	0.659155
PVP01_0603500			104.997	-0.936988	0.799136	-1.1725	0.240996	0.659314
PVP01_0949400			20.3179	-1.51947	1.29579	-1.17262	0.240949	0.659314
PVP01_0903800			311.88	1.88759	1.61167	1.1712	0.241519	0.659357
PVP01_0806600			28.1481	1.17683	1.00428	1.17182	0.24127	0.659357
PVP01_1231600			21.7489	1.10517	0.943074	1.17188	0.241246	0.659357
PVP01_0925200			132.489	-1.11967	0.955875	-1.17135	0.241457	0.659357
PVP01_0530400			55.0298	1.58851	1.35747	1.1702	0.24192	0.659549
PVP01_1249300			17.638	-1.40253	1.19866	-1.17008	0.24197	0.659549
PVP01_0932700			16.8301	-1.46026	1.2474	-1.17064	0.241745	0.659549
PVP01_0525400			8.72014	1.31422	1.12406	1.16918	0.242332	0.659559
PVP01_0615000			314.728	0.857816	0.734116	1.1685	0.242604	0.659559
PVP01_0531200			58.4258	-0.907618	0.776952	-1.16818	0.242735	0.659559
PVP01_1455200			178.659	-1.06945	0.914868	-1.16896	0.242419	0.659559
PVP01_0304100			18.5371	-1.231	1.05375	-1.16821	0.242723	0.659559
PVP01_0000200			71.1873	-1.2449	1.06441	-1.16958	0.242171	0.659559
PVP01_0009410			9.67825	1.92973	1.66441	1.1594	0.246291	0.65981
PVP01_0801500			304.502	1.8753	1.60907	1.16546	0.243833	0.65981
PVP01_1234300			16.7702	1.79172	1.54295	1.16123	0.245549	0.65981
PVP01_1252100			19.9344	1.63027	1.40657	1.15904	0.246441	0.65981
PVP01_1430500			19.1349	1.49156	1.28606	1.15978	0.246136	0.65981
PVP01_1425600			36.904	1.4073	1.21402	1.15921	0.246372	0.65981
PVP01_1419300			40.3741	1.34725	1.15782	1.16361	0.244583	0.65981
PVP01_0923600			862.383	1.22559	1.05193	1.16509	0.243983	0.65981
PVP01_0905800			2017.53	1.11835	0.961835	1.16272	0.244942	0.65981
PVP01_1259600			49.1969	0.948961	0.818129	1.15992	0.246083	0.65981
PVP01_1258700			187.699	0.898029	0.77348	1.16102	0.245632	0.65981
PVP01_0715400			117.313	0.873335	0.750187	1.16416	0.24436	0.65981
PVP01_0826600			497.702	0.831293	0.715357	1.16207	0.245208	0.65981
PVP01_1426100			403.906	-0.689745	0.59383	-1.16152	0.245431	0.65981
PVP01_1226200			118.139	-0.757181	0.650575	-1.16386	0.244479	0.65981
PVP01_0720700			462.129	-0.90729	0.782908	-1.15887	0.246508	0.65981
PVP01_0515600			120.346	-0.958443	0.821129	-1.16722	0.24312	0.65981
PVP01_0807400			165.708	-1.02647	0.883818	-1.1614	0.245478	0.65981
PVP01_1416500			35.7938	-1.06066	0.910475	-1.16495	0.244038	0.65981
PVP01_API04300			31.9066	-1.09081	0.935891	-1.16553	0.243806	0.65981
PVP01_1416300			86.0778	-1.1225	0.961993	-1.16685	0.243273	0.65981
PVP01_0926900			178.086	-1.14909	0.984969	-1.16662	0.243362	0.65981
PVP01_0210300			66.271	-1.17449	1.00898	-1.16405	0.244406	0.65981
PVP01_1457800			51.8717	-1.27476	1.09972	-1.15916	0.246389	0.65981
PVP01_1454100			18.9389	-1.37256	1.18336	-1.15988	0.246096	0.65981
PVP01_1229900			16.9491	-1.42286	1.22096	-1.16536	0.243873	0.65981
PVP01_1245600			19.6872	-1.45441	1.24804	-1.16536	0.243873	0.65981
PVP01_0712500			97.5392	-1.54603	1.33177	-1.16088	0.245692	0.65981
PVP01_1460500			23.0844	-1.86218	1.60647	-1.15917	0.246386	0.65981
PVP01_0800800			6.29219	1.67355	1.445	1.15817	0.246794	0.660234
PVP01_1322800			226.441	0.963284	0.832135	1.15761	0.247025	0.660512
PVP01_1223000			24.4094	-1.48651	1.28457	-1.1572	0.247189	0.660611
PVP01_1112600			39.8337	-0.919494	0.795277	-1.15619	0.247602	0.660696
PVP01_1013200			79.9192	-0.96106	0.831068	-1.15642	0.247511	0.660696
PVP01_1018000			34.8032	-1.41417	1.22261	-1.15668	0.247403	0.660696
PVP01_0010900			5.3729	4.9645	4.31071	1.15167	0.249458	0.660862
PVP01_0007610			5.3729	4.9645	4.31071	1.15167	0.249458	0.660862
PVP01_1119100			5.52654	1.67836	1.45287	1.1552	0.248009	0.660862
PVP01_1231700			173.177	1.22803	1.06474	1.15336	0.248761	0.660862
PVP01_1332100			39.3249	1.21581	1.05327	1.15432	0.248369	0.660862
PVP01_1302200			240.368	0.86863	0.754336	1.15152	0.24952	0.660862
PVP01_1010100			118.252	0.796655	0.691613	1.15188	0.249371	0.660862
PVP01_1314200			574.501	0.7899	0.68516	1.15287	0.248964	0.660862
PVP01_1134600			152.896	-0.900598	0.781338	-1.15264	0.24906	0.660862
PVP01_1415600			89.5248	-0.952183	0.824852	-1.15437	0.248349	0.660862
PVP01_0717700			2.67332	-1.46205	1.26981	-1.15139	0.249572	0.660862
PVP01_0925100			24.1794	-1.50376	1.30363	-1.15352	0.248698	0.660862
PVP01_0602000			41.2934	-1.54171	1.33895	-1.15143	0.249556	0.660862
PVP01_0714300			15.6546	-1.71193	1.48669	-1.15151	0.249523	0.660862
PVP01_0701200			63.1282	-1.90796	1.6559	-1.15222	0.249229	0.660862
PVP01_0214700			12.876	-1.27174	1.10587	-1.14999	0.25015	0.661917
PVP01_0514600			7.9471	-1.52398	1.32543	-1.1498	0.250225	0.661917
PVP01_1134900			48.7791	-0.807003	0.703195	-1.14762	0.251124	0.663881
PVP01_0412400			785.298	-1.22869	1.07086	-1.14739	0.251222	0.663881
PVP01_0407800			175.298	-1.08821	0.94948	-1.14611	0.25175	0.664938
PVP01_0927800			21.7374	1.18775	1.03665	1.14576	0.251895	0.664983
PVP01_1326600			973.933	-1.00651	0.879012	-1.14504	0.252191	0.665401
PVP01_1210500			131.114	-1.47532	1.28876	-1.14476	0.25231	0.665401
PVP01_0534000			7.52302	1.23785	1.0817	1.14436	0.252472	0.665493
PVP01_1467900			225.513	0.800356	0.69968	1.14389	0.25267	0.665677
PVP01_1422600			16.4276	1.51517	1.32645	1.14228	0.25334	0.665739
PVP01_1128400			90.5156	0.887026	0.776551	1.14226	0.253344	0.665739
PVP01_0512100			134.611	-0.918716	0.803755	-1.14303	0.253026	0.665739
PVP01_0410500			90.3086	-1.00117	0.876648	-1.14205	0.253435	0.665739
PVP01_0107700			29.5532	-1.35595	1.18737	-1.14198	0.253462	0.665739
PVP01_0527800			6.3643	-1.40874	1.23285	-1.14267	0.253175	0.665739
PVP01_0509800			12.0828	-1.27828	1.11992	-1.14141	0.2537	0.666027
PVP01_1465700			121.382	0.798984	0.700257	1.14099	0.253876	0.666152
PVP01_1229200			380.752	0.76222	0.668605	1.14002	0.25428	0.666539
PVP01_1329100			276.355	-0.900375	0.789671	-1.14019	0.254207	0.666539
PVP01_1267800			33.6639	1.06339	0.933272	1.13942	0.254529	0.666855
PVP01_1227300			138.731	1.25283	1.10013	1.1388	0.254787	0.667196
PVP01_0729000			218.102	-0.811789	0.713625	-1.13756	0.255306	0.668217
PVP01_0919900			43.9834	-0.937174	0.824393	-1.13681	0.25562	0.668702
PVP01_0105600			54.2933	1.28853	1.13443	1.13584	0.256022	0.66886
PVP01_1243400			20.174	1.20675	1.06281	1.13543	0.256193	0.66886
PVP01_1404900			20.4698	1.0345	0.91135	1.13512	0.256323	0.66886
PVP01_0508200			2628.96	-0.785724	0.691896	-1.13561	0.25612	0.66886
PVP01_1465200			24.5127	-1.08871	0.958885	-1.13539	0.256212	0.66886
PVP01_0830000			1227.98	1.18226	1.0423	1.13429	0.256675	0.669035
PVP01_0212600			80.3573	-0.896274	0.790293	-1.1341	0.256751	0.669035
PVP01_1130400			14.4365	-1.02729	0.90611	-1.13374	0.256905	0.669035
PVP01_1325700			41.0166	-1.18852	1.04826	-1.13381	0.256875	0.669035
PVP01_0939400			137.933	0.939259	0.828822	1.13324	0.257111	0.669236
PVP01_1032700			29.7626	1.61395	1.42494	1.13264	0.257364	0.66956
PVP01_0115800			919.479	1.21651	1.07435	1.13231	0.257503	0.669584
[truncated: 3,765 more rows]

## Sheet: 1vs3
Gene ID	Gene Name	Product Description	baseMean	log2FoldChange	lfcSE	stat	pvalue	padj
PVP01_1219200	MSP-7M	hypothetical protein	169.855	2.27281	0.735342	3.09082	0.00199602	0.0124796
PVP01_0000150	TRAG30	tryptophan-rich protein	228.319	-5.75541	0.605173	-9.51035	1.90026e-21	9.91175e-18
PVP01_0000170	TRAG32	tryptophan-rich protein	645.16	-4.98292	0.558225	-8.92637	4.40236e-19	7.65423e-16
PVP01_0423100		Plasmodium exported protein (PHISTc), unknown function	129.773	5.95734	0.66612	8.94335	3.77543e-19	7.65423e-16
PVP01_1244000	GAPDH	glyceraldehyde-3-phosphate dehydrogenase, putative	2658	-3.57089	0.410979	-8.68873	3.66509e-18	4.77928e-15
PVP01_1216400	EF-1gamma	elongation factor 1-gamma, putative	185.578	-4.59065	0.531597	-8.63559	5.84272e-18	6.09512e-15
PVP01_0404300		Plasmodium exported protein, unknown function	137.304	5.42275	0.638808	8.48887	2.08661e-17	1.81396e-14
PVP01_1147500		Plasmodium exported protein, unknown function	587.684	5.79071	0.688137	8.41505	3.92737e-17	2.92645e-14
PVP01_0610700		conserved Plasmodium protein, unknown function	727.105	2.92173	0.359256	8.13272	4.1978e-16	2.73697e-13
PVP01_0000160	TRAG31	tryptophan-rich protein	812.951	6.65774	0.849619	7.83614	4.64598e-15	2.6926e-12
PVP01_0948800	TRAG16	tryptophan-rich protein	479.54	5.23467	0.66927	7.82147	5.22084e-15	2.72319e-12
PVP01_0000120	TRAG27	tryptophan-rich protein	365.736	3.78026	0.485793	7.78162	7.16022e-15	3.39524e-12
PVP01_0507600	RACK1	receptor for activated c kinase, putative	313.598	-3.84644	0.514128	-7.48148	7.34909e-14	3.1944e-11
PVP01_1033600	SBP1	skeleton-binding protein 1, putative	1539.18	2.47197	0.331022	7.4677	8.16099e-14	3.27444e-11
PVP01_1402300		Plasmodium exported protein, unknown function	66.5868	7.10393	0.993098	7.1533	8.4716e-13	3.15628e-10
PVP01_1013900	RPS9	40S ribosomal protein S9, putative	337.235	-3.13521	0.439576	-7.13235	9.86662e-13	3.43095e-10
PVP01_1034000		Plasmodium exported protein (PHIST), unknown function	113.225	7.94547	1.11882	7.10163	1.23292e-12	4.01933e-10
PVP01_1215900		CPW-WPC family protein	244.906	5.79533	0.827266	7.0054	2.46286e-12	7.55664e-10
PVP01_1033900	TRAG18	tryptophan-rich protein	2272.95	3.29697	0.474725	6.94501	3.78429e-12	1.0966e-09
PVP01_1203800		phosphatidylinositol transfer protein, putative	774.173	3.12427	0.45602	6.85117	7.32468e-12	2.01082e-09
PVP01_0112200		plasmepsin X, putative	77.5967	5.24033	0.772459	6.78396	1.16926e-11	3.04943e-09
PVP01_1114900		elongation factor 1-alpha, putative	294.399	-3.18347	0.470349	-6.76831	1.30298e-11	3.23636e-09
PVP01_0820000		CPW-WPC family protein	67.2107	4.68858	0.699232	6.70533	2.00955e-11	4.76445e-09
PVP01_0929100	PFK11	ATP-dependent 6-phosphofructokinase, putative	182.015	4.67863	0.700675	6.67732	2.43359e-11	5.51896e-09
PVP01_1140100	OAT	ornithine aminotransferase, putative	207.797	-4.2149	0.63441	-6.64382	3.05659e-11	6.37726e-09
PVP01_0004260		hypothetical protein	151.332	7.02145	1.05683	6.64389	3.05511e-11	6.37726e-09
PVP01_0503800		Plasmodium exported protein (PHIST), unknown function	1489.64	3.65478	0.550941	6.6337	3.27376e-11	6.56767e-09
PVP01_1240900		40S ribosomal protein S3, putative	275.877	-3.53618	0.533943	-6.62276	3.52549e-11	6.81072e-09
PVP01_0814600		conserved Plasmodium protein, unknown function	191.132	4.55369	0.690696	6.5929	4.31328e-11	8.03502e-09
PVP01_1127700		nascent polypeptide-associated complex subunit alpha, putative	105.608	-3.39847	0.517758	-6.56382	5.24477e-11	9.43335e-09
PVP01_0601900		Plasmodium exported protein (PHIST), unknown function	203.657	5.33073	0.81626	6.53068	6.54725e-11	1.12738e-08
PVP01_0611800		conserved Plasmodium protein, unknown function	122.917	4.59922	0.704622	6.52722	6.7003e-11	1.12738e-08
PVP01_1467200	G377	osmiophilic body protein G377, putative	1829.97	6.5222	1.00119	6.51446	7.29502e-11	1.18909e-08
PVP01_0612900	RPL3	60S ribosomal protein L3, putative	413.52	-3.88074	0.596543	-6.50538	7.74972e-11	1.19663e-08
PVP01_0422800		Plasmodium exported protein (PHIST), unknown function	2825.04	5.2327	0.804486	6.50441	7.80015e-11	1.19663e-08
PVP01_0616300	MORN1	MORN repeat-containing protein 1, putative	71.197	5.54764	0.856442	6.47754	9.32284e-11	1.38937e-08
PVP01_0734300		conserved Plasmodium protein, unknown function	1387.67	3.40367	0.527176	6.45642	1.07208e-10	1.55333e-08
PVP01_0610200		EF-hand calcium-binding domain-containing protein, putative	349.43	4.20152	0.652939	6.43478	1.23649e-10	1.74312e-08
PVP01_1315200	HOP	Hsp70/Hsp90 organizing protein, putative	127.045	-3.24676	0.505035	-6.42877	1.28641e-10	1.76484e-08
PVP01_1402200		Plasmodium exported protein, unknown function	559.561	9.41104	1.46642	6.41771	1.38344e-10	1.76484e-08
PVP01_0405900		conserved Plasmodium protein, unknown function	318.615	5.06546	0.789345	6.41729	1.38724e-10	1.76484e-08
PVP01_1265800		60S ribosomal protein L1, putative	199.186	-2.8305	0.440707	-6.42263	1.33939e-10	1.76484e-08
PVP01_1470200		Plasmodium exported protein, unknown function	886.933	7.55873	1.17903	6.41097	1.44599e-10	1.79578e-08
PVP01_0623900		ring-exported protein 4, putative	76.84	6.66158	1.04607	6.36821	1.91242e-10	2.31981e-08
PVP01_1227100		conserved Plasmodium protein, unknown function	283.818	4.66063	0.734503	6.34529	2.22004e-10	2.61669e-08
PVP01_0114200		ferlin, putative	79.5759	3.5804	0.56449	6.34272	2.2575e-10	2.61669e-08
PVP01_1028300		conserved Plasmodium protein, unknown function	60.9215	5.28141	0.837452	6.30652	2.85382e-10	3.23598e-08
PVP01_1024300		conserved Plasmodium protein, unknown function	488.549	5.2736	0.836906	6.30131	2.9514e-10	3.27542e-08
PVP01_0519000		conserved Plasmodium protein, unknown function	176.776	3.77897	0.60011	6.29714	3.03194e-10	3.29471e-08
PVP01_1330100		signal recognition particle RNA	22205.5	3.75506	0.600887	6.24919	4.12593e-10	4.30418e-08
PVP01_0801500		Plasmodium exported protein, unknown function	160.256	2.8861	0.461662	6.25154	4.06428e-10	4.30418e-08
PVP01_0833200		40S ribosomal protein S23, putative	296.776	-2.71526	0.435165	-6.23962	4.38629e-10	4.48605e-08
PVP01_0512600		60S ribosomal protein L22, putative	96.6228	-3.55025	0.569902	-6.22958	4.67699e-10	4.69138e-08
PVP01_0734900		Plasmodium exported protein (PHIST), unknown function	77.8639	10.1279	1.65164	6.13203	8.67671e-10	8.53919e-08
PVP01_0614700	ADA	adenosine deaminase, putative	263.634	-4.32825	0.709522	-6.10024	1.05909e-09	1.023e-07
PVP01_0812500	HGPRT	hypoxanthine-guanine phosphoribosyltransferase, putative	201.63	-4.37056	0.716883	-6.09661	1.0834e-09	1.02746e-07
PVP01_0207800	CEN1	centrin-1, putative	111.473	3.35551	0.556648	6.02806	1.65942e-09	1.54563e-07
PVP01_0908700	MSCS	mechanosensitive ion channel protein, putative	174.667	4.75171	0.790447	6.01143	1.83899e-09	1.68284e-07
PVP01_0623100		Plasmodium exported protein, unknown function	642.409	-2.58711	0.430998	-6.00261	1.94176e-09	1.74624e-07
PVP01_1252300		6-phosphogluconate dehydrogenase, decarboxylating, putative	134.622	-3.47357	0.579246	-5.99671	2.01358e-09	1.78014e-07
PVP01_0004240	RBSA	reticulocyte binding surface protein RBSA	138.382	5.77262	0.965098	5.98138	2.21252e-09	1.92342e-07
PVP01_0102500		Plasmodium exported protein (PHIST), unknown function, pseudogene	218.065	2.93526	0.491928	5.96686	2.4187e-09	2.06819e-07
PVP01_0518500	DMC1	meiotic recombination protein DMC1, putative	287.639	4.84377	0.813288	5.95579	2.58822e-09	2.17744e-07
PVP01_1255900	eEF2	elongation factor 2, putative	534.225	-3.20721	0.539206	-5.94802	2.71413e-09	2.24713e-07
PVP01_0918300	RAN	GTP-binding nuclear protein RAN/TC4, putative	150.198	-2.76708	0.465961	-5.93843	2.87756e-09	2.34521e-07
PVP01_0601000		Plasmodium exported protein, unknown function	194.308	6.87504	1.16299	5.91153	3.38945e-09	2.71991e-07
PVP01_1437800	FRM2	formin 2, putative	107.678	3.32875	0.564115	5.90084	3.61657e-09	2.85819e-07
PVP01_1325600		conserved Plasmodium protein, unknown function	277.288	5.8625	0.994315	5.89602	3.72369e-09	2.89892e-07
PVP01_0202500		Plasmodium exported protein, unknown function	81.9805	4.7506	0.807535	5.88284	4.03285e-09	3.09343e-07
PVP01_0206000	CCp5	LCCL domain-containing protein, putative	1030.46	5.33654	0.910895	5.85857	4.66866e-09	3.52923e-07
PVP01_0930300		phosphatidylinositol-4-phosphate 5-kinase, putative	84.3552	4.1106	0.70688	5.81514	6.05832e-09	4.51432e-07
PVP01_0808600		Plasmodium exported protein (PHIST), unknown function	130.152	-2.98824	0.517465	-5.77477	7.70572e-09	5.66099e-07
PVP01_0108700	HSP90	heat shock protein 90, putative	2114.41	-2.19464	0.380335	-5.77026	7.9148e-09	5.73383e-07
PVP01_1313900		conserved Plasmodium protein, unknown function	196.428	4.73726	0.829361	5.71194	1.11697e-08	7.87314e-07
PVP01_1207200		conserved Plasmodium protein, unknown function	42.5823	4.57416	0.800564	5.71367	1.10562e-08	7.87314e-07
PVP01_1267100		triosephosphate isomerase, putative	220.319	-3.81964	0.669562	-5.70468	1.16563e-08	8.10655e-07
PVP01_0924400	SMC5	structural maintenance of chromosomes protein 5, putative	154.568	3.27785	0.575075	5.69986	1.19904e-08	8.22923e-07
PVP01_1452300		helicase, putative	137.608	2.89998	0.509156	5.69566	1.22898e-08	8.32516e-07
PVP01_0822500	RPS11	40S ribosomal protein S11, putative	227.459	-2.52012	0.443277	-5.6852	1.3066e-08	8.73749e-07
PVP01_1024500		ERCC4 domain-containing protein, putative	43.5843	4.3918	0.773693	5.67641	1.37552e-08	9.0819e-07
PVP01_0411300		conserved Plasmodium protein, unknown function	116.532	3.20893	0.565749	5.672	1.41137e-08	9.20212e-07
PVP01_0533000	TRAG12	tryptophan-rich protein	114.775	3.39501	0.598798	5.66972	1.43032e-08	9.21059e-07
PVP01_1201400		Plasmodium exported protein (PHIST), unknown function	916.288	5.8793	1.03766	5.6659	1.46257e-08	9.30339e-07
PVP01_0423300		hypothetical protein	166.886	4.47255	0.790632	5.65694	1.54099e-08	9.68409e-07
PVP01_1470100	TRAG24	tryptophan-rich protein	64.3101	4.45292	0.792	5.62238	1.88348e-08	1.16955e-06
PVP01_1470500		Plasmodium exported protein, unknown function	41.6611	5.73035	1.02324	5.60022	2.14075e-08	1.31367e-06
PVP01_1032600	MSP8	merozoite surface protein 8, putative	396.066	-2.81523	0.503254	-5.59404	2.2184e-08	1.31491e-06
PVP01_1448000	MyoJ	myosin J, putative	98.0517	3.58595	0.64091	5.59509	2.20507e-08	1.31491e-06
PVP01_1470300		Plasmodium exported protein (PHIST), unknown function	36.9241	9.05247	1.61728	5.59735	2.17656e-08	1.31491e-06
PVP01_0000100	TRAG25	tryptophan-rich protein	214.105	2.61912	0.469144	5.58276	2.36729e-08	1.38739e-06
PVP01_0601600		Plasmodium exported protein (PHIST), unknown function	155.25	3.01797	0.540931	5.57921	2.41614e-08	1.40029e-06
PVP01_0103700		erythrocyte membrane-associated antigen, putative	811.832	-2.70848	0.486391	-5.56853	2.56896e-08	1.4725e-06
PVP01_1252600	APP	aminopeptidase P, putative	217.876	-3.1521	0.566382	-5.56532	2.61678e-08	1.4836e-06
PVP01_0803400	IMC1c	inner membrane complex protein 1c, putative	54.6688	3.4759	0.624802	5.5632	2.64875e-08	1.48558e-06
PVP01_1305700	RPC2	DNA-directed RNA polymerase III subunit RPC2, putative	87.7026	-2.93029	0.527161	-5.55862	2.71913e-08	1.50883e-06
PVP01_0612400	nPrx	merozoite capping protein 1, putative	230.641	2.57861	0.464861	5.54706	2.90514e-08	1.59405e-06
PVP01_0318500		conserved Plasmodium protein, unknown function	192.245	5.14575	0.927941	5.54534	2.93383e-08	1.59405e-06
PVP01_0114300		C-mannosyltransferase, putative	55.1321	6.9753	1.2633	5.52147	3.36172e-08	1.8077e-06
PVP01_0115800		conserved Plasmodium protein, unknown function	385.798	3.82661	0.693998	5.51386	3.51045e-08	1.86842e-06
PVP01_1401000		Plasmodium exported protein, unknown function	52.5967	9.56538	1.73608	5.50975	3.59342e-08	1.89326e-06
PVP01_1452900	SF3B3	splicing factor 3B subunit 3, putative	125.528	-2.72917	0.497059	-5.49064	4.00478e-08	2.07062e-06
PVP01_0201100	TRAG1	tryptophan-rich protein	369.325	2.71919	0.49526	5.49044	4.00944e-08	2.07062e-06
PVP01_0902400		hypothetical protein	30.2501	8.75661	1.60362	5.46052	4.74753e-08	2.42776e-06
PVP01_1437400	RRS	arginine--tRNA ligase, putative	52.3223	-5.36736	0.98719	-5.437	5.41849e-08	2.74396e-06
PVP01_0504500		28S ribosomal RNA	184702	3.63906	0.671073	5.42274	5.86907e-08	2.94357e-06
PVP01_0833100	RPS12	40S ribosomal protein S12, putative	120.291	-3.02711	0.56001	-5.40545	6.46446e-08	3.2113e-06
PVP01_1205600		glutamate--tRNA ligase, putative	169.139	-2.3889	0.442731	-5.39584	6.8204e-08	3.35615e-06
PVP01_0826600		conserved Plasmodium protein, unknown function	212.644	2.45893	0.457391	5.37599	7.61636e-08	3.7128e-06
PVP01_0803300		40S ribosomal protein S20e, putative	106.531	-3.53009	0.657369	-5.37003	7.87234e-08	3.80205e-06
PVP01_1261900		histidine--tRNA ligase, putative	93.8249	-3.32817	0.62018	-5.36646	8.02973e-08	3.84248e-06
PVP01_1456700		sphingomyelin phosphodiesterase, putative	169.195	4.16476	0.778364	5.35066	8.76348e-08	4.14076e-06
PVP01_0707000		conserved Plasmodium protein, unknown function	51.5058	3.49788	0.653851	5.34966	8.81183e-08	4.14076e-06
PVP01_1126600	AP2Tel	AP2 domain transcription factor AP2Tel, putative	422.732	2.62716	0.492783	5.33127	9.75308e-08	4.54215e-06
PVP01_1213600		60S ribosomal protein L18a, putative	144.709	-3.82091	0.716962	-5.32931	9.85886e-08	4.55078e-06
PVP01_0838000		Plasmodium exported protein, unknown function	50.8918	9.5186	1.79057	5.31597	1.06089e-07	4.85405e-06
PVP01_0422100	ROPE	repetitive organellar protein, putative	162.389	2.21807	0.41773	5.30982	1.09734e-07	4.93423e-06
PVP01_1216500		60S ribosomal protein L6-2, putative	267.083	-3.05521	0.575238	-5.3112	1.08904e-07	4.93423e-06
PVP01_1020200	PSOP12	secreted ookinete protein, putative	474.007	6.40035	1.20645	5.30511	1.12605e-07	4.99082e-06
PVP01_0824400		conserved Plasmodium protein, unknown function	79.1458	4.10783	0.774387	5.30462	1.12906e-07	4.99082e-06
PVP01_0702600	PH	PH domain-containing protein, putative	128.912	4.85167	0.921123	5.26712	1.38582e-07	5.92963e-06
PVP01_1345600		conserved Plasmodium protein, unknown function	122.479	7.21055	1.36858	5.26864	1.37439e-07	5.92963e-06
PVP01_1406200		conserved Plasmodium protein, unknown function	237.152	-2.48083	0.470627	-5.27133	1.35437e-07	5.92963e-06
PVP01_1008300		WD repeat-containing protein, putative	93.8604	-3.71632	0.70559	-5.26697	1.38692e-07	5.92963e-06
PVP01_1439700	IMC1h	inner membrane complex protein 1h, putative	47.1997	5.92035	1.12463	5.26428	1.40739e-07	5.96825e-06
PVP01_0910700	RPL36	60S ribosomal protein L36, putative	135.583	-2.49701	0.474769	-5.25942	1.44508e-07	6.07868e-06
PVP01_0909900		conserved Plasmodium protein, unknown function	192.632	4.73858	0.903496	5.24471	1.56524e-07	6.53145e-06
PVP01_1309400		zinc finger protein, putative	188.345	4.73147	0.907963	5.21108	1.87741e-07	7.77187e-06
PVP01_1101700		conserved Plasmodium protein, unknown function	842.501	1.93933	0.37251	5.20611	1.92837e-07	7.91997e-06
PVP01_1146900		conserved Plasmodium protein, unknown function	271.412	3.07633	0.59185	5.19782	2.01643e-07	8.21694e-06
PVP01_0202300		Plasmodium exported protein, unknown function	745.751	10.0129	1.92759	5.19452	2.05252e-07	8.29917e-06
PVP01_1143200		conserved Plasmodium protein, unknown function	22.7255	8.34636	1.60768	5.19156	2.08538e-07	8.3672e-06
PVP01_0731500	CSE1	importin alpha re-exporter, putative	232.044	-2.12006	0.408733	-5.18692	2.13796e-07	8.45889e-06
PVP01_0115300	GAMER	gamete release protein, putative	63.9933	8.17122	1.57661	5.18279	2.18596e-07	8.45889e-06
PVP01_1019900		tubulin--tyrosine ligase, putative	50.6487	3.18457	0.614486	5.1825	2.18932e-07	8.45889e-06
PVP01_1225000		conserved Plasmodium protein, unknown function	1304.54	3.03872	0.586293	5.18294	2.18411e-07	8.45889e-06
PVP01_0414100		conserved Plasmodium protein, unknown function	33.3552	-8.23526	1.58777	-5.18666	2.14094e-07	8.45889e-06
PVP01_0905200		thioredoxin, putative	90.9756	-2.8447	0.550581	-5.16672	2.38235e-07	9.137e-06
PVP01_1445900		conserved Plasmodium protein, unknown function	152.023	3.34798	0.648329	5.16402	2.41706e-07	9.20248e-06
PVP01_0516100		Plasmodium exported protein (PHIST), unknown function	90.0039	7.93451	1.54413	5.13848	2.76965e-07	1.03931e-05
PVP01_1132400		ras GTPAse, putative	63.0651	2.88252	0.56082	5.13983	2.74993e-07	1.03931e-05
PVP01_0916100	VP3	vivapain-3	236.296	-2.81052	0.54726	-5.13563	2.81198e-07	1.04475e-05
PVP01_1114000		pyrroline-5-carboxylate reductase, putative	30.2076	-5.74785	1.11939	-5.13482	2.82419e-07	1.04475e-05
PVP01_1410100		60S ribosomal protein L24, putative	184.44	-2.60484	0.508104	-5.12659	2.95032e-07	1.08372e-05
PVP01_0000210		tryptophan-rich protein	38.9635	7.29051	1.42375	5.12064	3.04498e-07	1.11067e-05
PVP01_0507200		conserved Plasmodium protein, unknown function	228.03	4.65802	0.915187	5.08969	3.58644e-07	1.29909e-05
PVP01_0945000	RPL41	60S ribosomal protein L41, putative	152.383	-2.36454	0.465313	-5.08161	3.74255e-07	1.34629e-05
PVP01_1413700		conserved Plasmodium protein, unknown function	234.575	2.83833	0.559009	5.07744	3.82561e-07	1.36674e-05
PVP01_1258600	HRD3	ubiquitin-protein ligase, putative	69.8152	-2.96306	0.585203	-5.06331	4.12046e-07	1.46206e-05
PVP01_1260800	LAP	M17 leucyl aminopeptidase, putative	257.913	-2.37834	0.471172	-5.04772	4.47121e-07	1.56522e-05
PVP01_0000220		Plasmodium exported protein, unknown function	93.2942	10.3894	2.05775	5.04892	4.44323e-07	1.56522e-05
PVP01_0605400		conserved Plasmodium protein, unknown function	473.425	5.18659	1.02859	5.04244	4.59632e-07	1.59829e-05
PVP01_0838600		PIR protein	56.0616	9.6578	1.9161	5.04033	4.64718e-07	1.60528e-05
PVP01_0719200		inosine-5'-monophosphate dehydrogenase, putative	80.7724	-2.68658	0.5343	-5.02823	4.95032e-07	1.69874e-05
PVP01_1134600		60S ribosomal protein L19, putative	191.148	-2.17767	0.433516	-5.02327	5.07982e-07	1.73179e-05
PVP01_0905700		calcium/calmodulin-dependent protein kinase, putative	21.6216	4.06753	0.810238	5.02017	5.16265e-07	1.7486e-05
PVP01_1470400		Plasmodium exported protein, unknown function	36.5736	7.20388	1.43907	5.00594	5.55912e-07	1.87073e-05
PVP01_0730300		conserved protein, unknown function	39.7547	3.76399	0.752213	5.00389	5.61859e-07	1.87863e-05
PVP01_0205000		conserved Plasmodium protein, unknown function	53.3553	4.05766	0.811788	4.99842	5.7802e-07	1.92035e-05
PVP01_1133900		conserved Plasmodium protein, unknown function	45.8377	3.90155	0.782457	4.98628	6.15517e-07	2.03199e-05
PVP01_0202200	TRAG2	tryptophan-rich protein	388.247	2.22143	0.446049	4.98023	6.35081e-07	2.07428e-05
PVP01_0809400	ZNF2	zinc finger protein, putative	20.4414	-5.15829	1.03583	-4.97987	6.36284e-07	2.07428e-05
PVP01_0908200	RAD51	DNA repair protein RAD51, putative	32.6863	3.39519	0.682973	4.97119	6.65425e-07	2.1425e-05
PVP01_0202700		28S ribosomal RNA	160.204	-3.58068	0.720274	-4.97128	6.65122e-07	2.1425e-05
PVP01_0818200	CYP19A	peptidyl-prolyl cis-trans isomerase, putative	252.593	-2.59144	0.521861	-4.96577	6.84306e-07	2.17643e-05
PVP01_0731800		conserved Plasmodium protein, unknown function	79.9999	2.74294	0.552279	4.96659	6.81395e-07	2.17643e-05
PVP01_1264100	SEC7	protein transport protein SEC7, putative	161.504	-2.12946	0.430138	-4.95065	7.39673e-07	2.33826e-05
PVP01_1469300		conserved Plasmodium protein, unknown function	202.848	2.3702	0.479003	4.94821	7.49009e-07	2.35351e-05
PVP01_0516200		Plasmodium exported protein (PHIST), unknown function	35.3542	4.54699	0.920072	4.942	7.73271e-07	2.40082e-05
PVP01_0927300		steryl ester hydrolase, putative	171.963	2.68672	0.543646	4.94203	7.73117e-07	2.40082e-05
PVP01_1268100	TPx1	thioredoxin peroxidase 1, putative	108.526	-3.41727	0.691962	-4.93852	7.8718e-07	2.42954e-05
PVP01_0816000	ENO	enolase, putative	2045.91	-3.61725	0.733339	-4.93258	8.115e-07	2.48987e-05
PVP01_1403700		40S ribosomal protein S7, putative	159.602	-2.78568	0.565084	-4.92967	8.23674e-07	2.51245e-05
PVP01_0503600	TRAG38	tryptophan-rich protein	169.722	3.54012	0.718409	4.92772	8.31949e-07	2.52294e-05
PVP01_1229700	LDH	L-lactate dehydrogenase	813.992	-2.0485	0.416075	-4.9234	8.50535e-07	2.53508e-05
PVP01_1143100	RAD50	DNA repair protein RAD50, putative	28.7817	4.06153	0.824603	4.92543	8.4173e-07	2.53508e-05
PVP01_1027600		conserved Plasmodium protein, unknown function	109.699	6.11057	1.24103	4.9238	8.48798e-07	2.53508e-05
PVP01_1142900		conserved Plasmodium protein, unknown function	315.372	2.5958	0.527522	4.92075	8.62134e-07	2.55505e-05
PVP01_0801600		Plasmodium exported protein, unknown function	566.097	2.16361	0.439864	4.91883	8.70647e-07	2.5657e-05
PVP01_0515900		Plasmodium exported protein (PHIST), unknown function	52.152	4.28035	0.870631	4.91638	8.81606e-07	2.5834e-05
PVP01_0836300		phosphatidylethanolamine-binding protein, putative	81.4915	4.56441	0.929499	4.91061	9.07928e-07	2.64567e-05
PVP01_0945800	SEC21	coatomer subunit gamma, putative	54.7021	-2.97609	0.606279	-4.90878	9.1647e-07	2.65573e-05
PVP01_0813400		conserved Plasmodium protein, unknown function	40.8746	-4.03304	0.823534	-4.89723	9.71966e-07	2.80098e-05
PVP01_0201400		PIR protein	31.9746	7.00736	1.43508	4.8829	1.04537e-06	2.99595e-05
PVP01_1121200	CEPT	choline/ethanolaminephosphotransferase, putative	81.1016	-2.52698	0.517818	-4.88004	1.06062e-06	3.02305e-05
PVP01_1019200		MORN repeat protein, putative	108.752	2.27644	0.467145	4.87308	1.09873e-06	3.11466e-05
PVP01_1416800		exportin-T, putative	174.854	-2.1915	0.45013	-4.8686	1.12389e-06	3.16876e-05
PVP01_0532300	ETRAMP	early transcribed membrane protein	688.654	-1.89542	0.389504	-4.86625	1.13733e-06	3.17874e-05
PVP01_1402000		hypothetical protein	78.7261	2.81312	0.578134	4.86586	1.13962e-06	3.17874e-05
PVP01_1201500		Plasmodium exported protein (PHIST), unknown function	25.6612	5.80947	1.19504	4.86133	1.16602e-06	3.2351e-05
PVP01_0712300	RRSapi	arginine--tRNA ligase, putative	38.7477	-3.06251	0.631472	-4.8498	1.23585e-06	3.41068e-05
PVP01_0825200		conserved Plasmodium protein, unknown function	44.2232	5.07288	1.04648	4.84756	1.24991e-06	3.42329e-05
PVP01_0010570		Plasmodium exported protein, unknown function	25.3566	3.76142	0.776034	4.84698	1.25354e-06	3.42329e-05
PVP01_0815700	HSP60	heat shock protein 60, putative	144.375	-2.23358	0.46145	-4.84036	1.29607e-06	3.52099e-05
PVP01_1416500	PIS	phosphatidylinositol synthase, putative	58.6018	-2.75862	0.570206	-4.83794	1.31191e-06	3.54554e-05
PVP01_1409200	cpsSII	carbamoyl phosphate synthetase, putative	324.694	-3.11776	0.644966	-4.83399	1.33821e-06	3.598e-05
PVP01_0616000	P28	ookinete surface protein P28, putative	139.577	5.67272	1.17485	4.82846	1.37591e-06	3.68038e-05
PVP01_1030200	RPL31	60S ribosomal protein L31, putative	161.246	-2.27979	0.472878	-4.8211	1.42772e-06	3.78019e-05
PVP01_0716900	TR	telomerase RNA	1451.61	2.84879	0.590809	4.82185	1.4223e-06	3.78019e-05
PVP01_0516400		Plasmodium exported protein (PHIST), unknown function	16.404	7.86654	1.63293	4.81745	1.45408e-06	3.83054e-05
PVP01_0909200	CK2alpha	casein kinase 2, alpha subunit, putative	59.1845	-3.07639	0.638935	-4.81487	1.47294e-06	3.86074e-05
PVP01_0509300		conserved Plasmodium protein, unknown function	180.002	3.50885	0.729276	4.81141	1.49872e-06	3.90866e-05
PVP01_0209800		RNase MRP	240.108	3.09422	0.643502	4.8084	1.52143e-06	3.9443e-05
PVP01_0207300		serine/threonine protein kinase, putative	153.877	3.07197	0.638982	4.8076	1.52751e-06	3.9443e-05
PVP01_0947400		conserved Plasmodium protein, unknown function	111.814	4.93896	1.0321	4.78537	1.70674e-06	4.36658e-05
PVP01_0943200		60S ribosomal protein L28, putative	84.5733	-3.1114	0.650208	-4.78525	1.70779e-06	4.36658e-05
PVP01_0207500		conserved Apicomplexan protein, unknown function	29.3295	3.33547	0.697693	4.78072	1.74672e-06	4.42277e-05
PVP01_1414900		conserved Plasmodium protein, unknown function	20.7889	-4.67297	0.977428	-4.78088	1.74529e-06	4.42277e-05
PVP01_1009400		conserved Plasmodium protein, unknown function	16.9108	-4.87839	1.02071	-4.7794	1.75816e-06	4.43023e-05
PVP01_1321000		proliferation-associated protein 2g4, putative	143.891	-2.84212	0.595504	-4.77262	1.81844e-06	4.56009e-05
PVP01_1306900		conserved Plasmodium protein, unknown function	91.1743	3.84961	0.807045	4.77	1.84223e-06	4.59763e-05
PVP01_0832500		conserved Plasmodium protein, unknown function	111.776	2.48034	0.520606	4.76432	1.89487e-06	4.7065e-05
PVP01_1229500		phosphoribosylpyrophosphate synthetase	104.501	-3.13491	0.659719	-4.75189	2.01523e-06	4.98172e-05
PVP01_0404800		Plasmodium exported protein, unknown function	55.6033	3.41597	0.72107	4.73736	2.16519e-06	5.32719e-05
PVP01_0809900		kinesin-4, putative	46.5281	4.95922	1.04707	4.73628	2.1768e-06	5.3306e-05
PVP01_0945500		conserved Plasmodium protein, unknown function	39.5525	4.144	0.875231	4.73475	2.19323e-06	5.34574e-05
PVP01_0708000	SPM1	subpellicular microtubule protein 1, putative	63.9243	5.14875	1.08838	4.73064	2.2381e-06	5.42974e-05
PVP01_0420600	AspAT	aspartate aminotransferase, putative	25.6371	-4.61214	0.978415	-4.71389	2.43036e-06	5.86887e-05
PVP01_0214300		RING zinc finger protein, putative	109.967	2.09271	0.444287	4.71027	2.47388e-06	5.94643e-05
PVP01_0118100	ApiAP2	AP2 domain transcription factor, putative	167.873	2.196	0.466918	4.70318	2.5614e-06	6.12857e-05
PVP01_1222500		conserved Plasmodium protein, unknown function	25.3657	3.83799	0.816749	4.69911	2.61294e-06	6.20457e-05
PVP01_1461900		cytoplasmic translation machinery associated protein, putative	40.7292	-3.77121	0.802589	-4.6988	2.61696e-06	6.20457e-05
PVP01_0950000		PIR protein	14.1635	7.65685	1.63122	4.69394	2.67993e-06	6.32513e-05
PVP01_0903900		60S acidic ribosomal protein P1, putative	174.355	-2.28725	0.487448	-4.6923	2.70148e-06	6.34727e-05
PVP01_1136900	LRR6	leucine-rich repeat protein	125.216	4.16764	0.888542	4.69042	2.7264e-06	6.37709e-05
PVP01_0001500		PIR protein	25.1094	5.59718	1.19388	4.68822	2.75596e-06	6.41746e-05
PVP01_0828800		protein kinase, putative	464.844	4.33538	0.925547	4.68413	2.81148e-06	6.51764e-05
PVP01_0817300	RPS3A	40S ribosomal protein S3A, putative	351.816	-2.15746	0.461231	-4.67762	2.90224e-06	6.69827e-05
PVP01_0009870		PIR protein	47.049	-2.77246	0.593748	-4.66941	3.02061e-06	6.94075e-05
PVP01_0522700		Plasmodium exported protein (PHIST), unknown function	381.527	2.23003	0.478088	4.66448	3.09403e-06	7.07827e-05
PVP01_0723100		conserved Plasmodium protein, unknown function	330.406	3.95782	0.84868	4.6635	3.1088e-06	7.081e-05
PVP01_1031100	MSP3G	merozoite surface protein 3	17.0915	7.95467	1.71091	4.64938	3.32931e-06	7.55031e-05
PVP01_0827100	HRD3	ubiquitin-protein ligase, putative	75.2319	-2.7657	0.595304	-4.64586	3.38662e-06	7.64703e-05
PVP01_1128100	ALV7	inner membrane complex protein 1j, putative	87.5659	5.92254	1.27526	4.64419	3.41415e-06	7.67594e-05
PVP01_1449200		conserved Plasmodium protein, unknown function	55.8747	3.65194	0.787763	4.63584	3.55499e-06	7.9583e-05
PVP01_1104300	AlaRS	alanine--tRNA ligase, putative	187.47	-3.2523	0.701739	-4.63462	3.57589e-06	7.97088e-05
PVP01_0511700	SEC23	protein transport protein SEC23, putative	142.504	-2.23137	0.481558	-4.63364	3.59284e-06	7.97458e-05
PVP01_0823300		40S ribosomal protein S15A, putative	274.763	-2.50316	0.540412	-4.63195	3.62245e-06	8.00622e-05
PVP01_1422100		conserved Plasmodium protein, unknown function	71.0714	-2.41117	0.520822	-4.62954	3.66477e-06	8.06559e-05
PVP01_1132600	TLP	TRAP-like protein, putative	26.1806	3.91406	0.845688	4.62826	3.68754e-06	8.0816e-05
PVP01_1017800	RPS11	40S ribosomal protein S11, putative	159.443	-2.89436	0.626483	-4.62	3.83733e-06	8.3747e-05
PVP01_0601200		Plasmodium exported protein, unknown function	621.382	-2.19384	0.475051	-4.61811	3.87252e-06	8.41628e-05
PVP01_0320400		conserved Plasmodium protein, unknown function	107.687	-2.21921	0.48156	-4.60838	4.05822e-06	8.78327e-05
PVP01_1018500		conserved Plasmodium protein, unknown function	186.872	4.96961	1.08034	4.60005	4.22386e-06	9.10399e-05
PVP01_1125500		hexokinase, putative	172.78	-2.50839	0.545597	-4.59751	4.27571e-06	9.17782e-05
PVP01_1251100	CCp2	LCCL domain-containing protein	427.232	5.46424	1.19063	4.58938	4.44573e-06	9.43078e-05
PVP01_1226600		ribose-phosphate pyrophosphokinase, putative	34.1404	-3.61403	0.787371	-4.59	4.43248e-06	9.43078e-05
PVP01_0624300		PIR protein	54.8023	-4.7102	1.02635	-4.58928	4.4478e-06	9.43078e-05
PVP01_0106600	RPL37	60S ribosomal protein L37, putative	161.514	-3.23842	0.708879	-4.56836	4.91552e-06	0.000103591
PVP01_0943300		60S ribosomal protein L35ae, putative	115.974	-2.60177	0.56957	-4.56794	4.92532e-06	0.000103591
PVP01_1450300	CPN60	60 kDa chaperonin, putative	52.1515	-2.68312	0.587886	-4.56402	5.01831e-06	0.000105123
PVP01_0518800	HSP20	small heat shock protein HSP20, putative	20.7591	6.5172	1.42867	4.56174	5.07321e-06	0.000105848
PVP01_0938300		CLPTM1 domain-containing protein, putative	54.4462	-3.17931	0.697249	-4.5598	5.12026e-06	0.000106403
PVP01_0525100		Plasmodium exported protein (PHIST), unknown function	12.1738	7.44562	1.63428	4.55589	5.21633e-06	0.00010797
PVP01_1452800	ULG8	upregulated in late gametocytes ULG8, putative	147.929	3.67179	0.806481	4.55286	5.29227e-06	0.000109109
PVP01_0915800		conserved Plasmodium protein, unknown function	28.8883	7.0209	1.54254	4.55152	5.32598e-06	0.000109371
PVP01_0827400		60S ribosomal protein L26, putative	192.835	-2.17242	0.47818	-4.54309	5.54357e-06	0.000113393
PVP01_0422700		gamete antigen 27/25, putative	99.3493	2.71798	0.599179	4.53617	5.72844e-06	0.000116717
PVP01_1235700	EXP2	exported protein 2, putative	248.261	-2.31413	0.511368	-4.52538	6.02868e-06	0.000122356
PVP01_0102600	SEMP1	small exported membrane protein 1, putative	144.972	3.06688	0.678226	4.52192	6.12826e-06	0.000123895
PVP01_0423600		Plasmodium exported protein (PHIST), unknown function	26.0738	8.56174	1.89377	4.52102	6.15433e-06	0.000123942
PVP01_1221800		isoleucine--tRNA ligase, putative	197.653	-2.40852	0.533541	-4.51422	6.35513e-06	0.000127494
PVP01_1111100		RNA-binding protein, putative	85.3156	-2.47841	0.549781	-4.50801	6.54394e-06	0.000130779
PVP01_1016600	FACT-L	FACT complex subunit SPT16, putative	505.661	2.76263	0.61524	4.49034	7.11109e-06	0.00014157
PVP01_0523400		Plasmodium exported protein (PHIST), unknown function	211.352	3.01545	0.672859	4.48155	7.41035e-06	0.000146967
PVP01_0413100	AsnRS	asparagine--tRNA ligase, putative	100.142	-2.87214	0.64186	-4.47472	7.65116e-06	0.000151168
PVP01_1318200		OST-HTH associated domain protein, putative	62.4223	3.0982	0.694247	4.46267	8.09439e-06	0.000159322
PVP01_1216900	CDPK5	calcium-dependent protein kinase 5, putative	20.4318	4.92185	1.10487	4.45467	8.40219e-06	0.000164142
PVP01_1269700		proteasome subunit alpha type-1, putative	50.7058	-3.31548	0.744177	-4.45523	8.38036e-06	0.000164142
PVP01_0422900		Plasmodium exported protein, unknown function	24.6326	4.7747	1.0721	4.4536	8.44418e-06	0.000164346
PVP01_1400800		Plasmodium exported protein, unknown function	11.2204	7.31774	1.64448	4.44988	8.59164e-06	0.000165365
PVP01_0516500		Plasmodium exported protein (PHIST), unknown function	19.4784	4.84533	1.08869	4.4506	8.56326e-06	0.000165365
PVP01_0209100		conserved Plasmodium protein, unknown function	264.954	2.05309	0.461264	4.451	8.54698e-06	0.000165365
PVP01_1304700		tetratricopeptide repeat protein, putative	416.338	3.42803	0.771519	4.44323	8.86196e-06	0.000169319
PVP01_0521700		conserved Plasmodium protein, unknown function	104.612	3.28045	0.738178	4.44398	8.83082e-06	0.000169319
PVP01_1346200		ribosomal protein S27a, putative	261.213	-1.89389	0.427432	-4.43085	9.38616e-06	0.00017868
PVP01_0523800		Plasmodium exported protein (PHIST), unknown function	13.6398	-6.94812	1.56885	-4.42879	9.4765e-06	0.000179743
PVP01_1115900		conserved Plasmodium protein, unknown function	156.877	3.78548	0.855422	4.42528	9.63176e-06	0.000182026
PVP01_0940100	ApiAP2	AP2 domain transcription factor, putative	516.539	2.51419	0.568515	4.42238	9.76206e-06	0.000183672
PVP01_1410700	VPS18	vacuolar protein sorting-associated protein 18, putative	54.693	-2.71116	0.613191	-4.4214	9.80643e-06	0.000183672
PVP01_1140300		conserved Plasmodium protein, unknown function	179.672	4.15002	0.938705	4.421	9.82447e-06	0.000183672
PVP01_1114500		conserved Plasmodium protein, unknown function	111.885	2.71639	0.614727	4.41886	9.92233e-06	0.000184839
PVP01_0304800	PRPF8	pre-mRNA-processing-splicing factor 8, putative	265.761	-1.76113	0.398827	-4.41577	1.00651e-05	0.000186831
PVP01_1432500	RPB8	DNA-directed RNA polymerases I, II, and III subunit RPABC3, putative	10.6151	-5.00541	1.13383	-4.41461	1.01193e-05	0.000187171
PVP01_1325100		small nucleolar RNA snoR23	34.5446	-3.71142	0.841712	-4.40937	1.0367e-05	0.000191074
PVP01_1015000		conserved Plasmodium protein, unknown function	20.9063	7.2607	1.64946	4.40187	1.07324e-05	0.000197113
PVP01_0832800	ClpP	ATP-dependent Clp protease proteolytic subunit, putative	10.9152	-5.03562	1.14766	-4.38773	1.14542e-05	0.000208899
PVP01_1403800		conserved Plasmodium protein, unknown function	36.4223	-4.07694	0.929067	-4.38821	1.14286e-05	0.000208899
PVP01_0404500		hypothetical protein	405.288	8.72266	1.99335	4.37587	1.20949e-05	0.000219816
PVP01_0801900		18S ribosomal RNA	3657.31	3.46416	0.792001	4.37394	1.22023e-05	0.000220997
PVP01_0919100	NOP56	nucleolar protein 56, putative	45.9036	-2.8148	0.643684	-4.37296	1.22573e-05	0.000221226
PVP01_1341700	CCp3	LCCL domain-containing protein, putative	329.075	5.32691	1.21854	4.37154	1.23374e-05	0.000221904
PVP01_1213400		60S ribosomal protein L18-2, putative	174.178	-2.44696	0.560171	-4.36824	1.25255e-05	0.000224511
PVP01_1216000		conserved Plasmodium protein, unknown function	115.836	2.83951	0.650629	4.36426	1.27554e-05	0.00022785
PVP01_1344900	CPPED1	serine/threonine protein phosphatase CPPED1, putative	62.2658	-3.15286	0.722579	-4.36334	1.28092e-05	0.000228029
PVP01_0943600		conserved Plasmodium protein, unknown function	17.4954	4.37466	1.0028	4.36245	1.28613e-05	0.000228179
PVP01_1438000	ATPase2	aminophospholipid-transporting P-ATPase, putative	118.909	-2.88747	0.662786	-4.35657	1.32119e-05	0.000233604
PVP01_1334100	SMB1	small nuclear ribonucleoprotein-associated protein B, putative	27.109	-4.28036	0.982833	-4.35512	1.32993e-05	0.000234355
PVP01_1109100		conserved Plasmodium protein, unknown function	85.8528	3.54235	0.814909	4.34692	1.38062e-05	0.000242469
PVP01_1310500	MCM8	DNA helicase MCM8, putative	44.306	2.79436	0.643062	4.34539	1.39028e-05	0.000243345
PVP01_0948700	TRAG15	tryptophan-rich protein	1370.63	1.91442	0.440818	4.34288	1.40625e-05	0.000245079
PVP01_1269500		conserved Plasmodium protein, unknown function	77.3368	-4.42012	1.01791	-4.34236	1.40958e-05	0.000245079
PVP01_0937000		conserved Plasmodium protein, unknown function	75.8877	4.60473	1.06114	4.33943	1.42853e-05	0.000247549
PVP01_1118000	ROMO1	reactive oxygen species modulator 1, putative	15.107	-4.7236	1.08916	-4.33692	1.4449e-05	0.000249557
PVP01_1450500		cytochrome b5, putative	41.3213	3.14532	0.725455	4.33565	1.45328e-05	0.000250175
PVP01_1327000	COX14	cytochrome c oxidase assembly protein COX14, putative	14.9409	-4.6981	1.0841	-4.33365	1.46656e-05	0.00025163
PVP01_0734200		Plasmodium exported protein, unknown function	9.94956	7.14499	1.64934	4.33203	1.47743e-05	0.000252415
PVP01_0725700		zinc finger protein, putative	92.4133	4.7442	1.09538	4.33109	1.48375e-05	0.000252415
PVP01_1323000		dynein intermediate chain, putative	170.133	3.50681	0.809736	4.33081	1.48565e-05	0.000252415
PVP01_0820300		conserved Plasmodium protein, unknown function	35.6788	3.42216	0.79181	4.32194	1.54664e-05	0.000261925
PVP01_1332800	SEY1	protein SEY1, putative	82.4316	-2.72074	0.631173	-4.31061	1.62805e-05	0.000273932
PVP01_1419600		conserved Plasmodium protein, unknown function	33.1882	3.93026	0.911709	4.31087	1.62615e-05	0.000273932
PVP01_1314900	METAP2	methionine aminopeptidase 2, putative	57.876	-2.91841	0.678397	-4.30191	1.69329e-05	0.000283993
PVP01_1431600	EIF3A	eukaryotic translation initiation factor 3 subunit A, putative	358.357	-2.01929	0.469593	-4.30009	1.7073e-05	0.000285053
PVP01_0713800	PFK9	ATP-dependent 6-phosphofructokinase, putative	512.422	-2.43231	0.565698	-4.29967	1.71054e-05	0.000285053
PVP01_0700400		Plasmodium exported protein, unknown function	18.8653	8.10045	1.88477	4.29785	1.72467e-05	0.000286492
PVP01_1253500	NNT	NAD(P) transhydrogenase, putative	74.8246	4.64998	1.08304	4.29344	1.75922e-05	0.000291305
PVP01_0728500		procollagen lysine 5-dioxygenase, putative	87.7042	3.88164	0.904362	4.29213	1.76967e-05	0.000292107
PVP01_1429100	EMC1	ER membrane protein complex subunit 1, putative	105.174	-2.721	0.636684	-4.27371	1.9225e-05	0.000316333
PVP01_0216000	AP2-L	AP2 domain transcription factor AP2-L, putative	240.542	-2.08051	0.487362	-4.26891	1.9643e-05	0.000321283
PVP01_0712800		conserved Plasmodium protein, unknown function	56.6895	3.70793	0.868603	4.26884	1.9649e-05	0.000321283
PVP01_1409400		conserved Plasmodium protein, unknown function	115.592	-2.12705	0.498427	-4.26752	1.97655e-05	0.000322177
PVP01_1347000	CK	choline kinase, putative	38.3788	-3.11607	0.730791	-4.26397	2.0083e-05	0.000326333
PVP01_1272300		PIR protein	24.2219	-6.18157	1.45029	-4.26231	2.02322e-05	0.000327736
PVP01_1258800		condensin-2 complex subunit G2, putative	189.914	2.90328	0.681426	4.26059	2.0389e-05	0.000329254
PVP01_0530400		conserved Plasmodium protein, unknown function	23.1307	8.39099	1.97144	4.25628	2.07861e-05	0.00033463
PVP01_0949700		PIR protein	11.6545	7.35307	1.72803	4.25517	2.08892e-05	0.000335256
PVP01_1401200		Plasmodium exported protein, unknown function	24.9372	8.49817	2.00258	4.24361	2.19953e-05	0.000351925
PVP01_1467500		conserved Plasmodium protein, unknown function	145.624	4.70787	1.1105	4.23943	2.2409e-05	0.000357448
PVP01_0604500		zinc finger protein, putative	157.06	5.71157	1.34896	4.23406	2.29511e-05	0.000364979
PVP01_1470800		PIR protein	10.0601	-6.50976	1.53787	-4.23298	2.30613e-05	0.000365616
PVP01_1319500		ADP-dependent DNA helicase RecQ, putative	31.3274	3.68179	0.870108	4.23141	2.32227e-05	0.00036706
PVP01_0920700	PGM1	phosphoglycerate mutase, putative	434.158	-3.09303	0.731608	-4.22771	2.36077e-05	0.000372017
PVP01_1401100		Plasmodium exported protein, unknown function	29.353	8.73075	2.06793	4.22198	2.42163e-05	0.000380459
PVP01_1113400		zinc finger protein, putative	20.0251	-4.49693	1.06531	-4.22122	2.42981e-05	0.000380597
PVP01_1241500		tRNA 3'-trailer sequence RNase, putative	35.7287	-2.96179	0.702273	-4.21743	2.47101e-05	0.000385893
PVP01_0702300	RPL32	60S ribosomal protein L32, putative	142.16	-2.37446	0.564195	-4.20858	2.56986e-05	0.000400131
PVP01_0730400		PIH1 domain-containing protein, putative	45.2518	3.24035	0.771059	4.20247	2.64015e-05	0.000409853
PVP01_1327200		conserved Plasmodium protein, unknown function	39.519	4.0833	0.972249	4.19985	2.67092e-05	0.000413398
PVP01_0829000		valine--tRNA ligase, putative	52.4956	-2.76354	0.659218	-4.19214	2.7633e-05	0.000426431
PVP01_0304000		conserved Plasmodium protein, unknown function	55.4561	4.04545	0.966218	4.18689	2.82802e-05	0.000435131
PVP01_1141300		conserved Plasmodium protein, unknown function	345.097	3.706	0.886566	4.18018	2.91279e-05	0.000446857
PVP01_0517700		conserved Plasmodium protein, unknown function	66.1385	3.07404	0.735997	4.1767	2.95765e-05	0.000452407
PVP01_0716200		conserved Plasmodium protein, unknown function	29.4499	-2.66676	0.638719	-4.17517	2.9776e-05	0.000454128
PVP01_0009180		PIR protein	10.5342	7.20464	1.72821	4.16885	3.0614e-05	0.000464499
PVP01_1202400		conserved Plasmodium protein, unknown function	67.6651	-2.28484	0.548095	-4.1687	3.06341e-05	0.000464499
PVP01_0933000		T-complex protein 1 subunit alpha, putative	157.517	-2.02294	0.48588	-4.16347	3.13452e-05	0.000473902
PVP01_1015100	PSOP13	secreted ookinete protein, putative	51.7162	5.96436	1.43293	4.16236	3.14975e-05	0.00047483
PVP01_0418900	PAT	pantothenate transporter, putative	16.3875	3.26152	0.784681	4.15649	3.23168e-05	0.00048438
PVP01_1424400		calcium-dependent protein kinase 3, putative	13.7351	5.90623	1.42091	4.15665	3.22949e-05	0.00048438
PVP01_0942600	IMC1b	inner membrane complex protein 1b, putative	45.2144	5.59202	1.34659	4.15274	3.28513e-05	0.000490981
PVP01_1425200		importin beta, putative	167.115	-3.06419	0.73845	-4.14949	3.33213e-05	0.000496582
PVP01_0924200		RAP protein, putative	65.6661	-2.80484	0.676419	-4.1466	3.37448e-05	0.000501378
PVP01_1268400		conserved Plasmodium protein, unknown function	15.9257	-4.82579	1.16397	-4.14599	3.38353e-05	0.000501378
PVP01_0532900	TRAG11	tryptophan-rich protein	342.795	1.73148	0.418018	4.14211	3.44119e-05	0.000508477
PVP01_0315200		LEM3/CDC50 family protein, putative	46.2676	3.37878	0.81672	4.13702	3.5185e-05	0.000518431
PVP01_1255800		conserved Plasmodium protein, unknown function	290.517	2.19565	0.531319	4.13245	3.58923e-05	0.000527364
PVP01_1249800		conserved Plasmodium protein, unknown function	33.1996	5.29258	1.28127	4.13071	3.6164e-05	0.000528379
PVP01_0930800		60S ribosomal protein P0, putative	319.36	-2.80195	0.678262	-4.13108	3.6107e-05	0.000528379
PVP01_1255400	LAP5	LCCL domain-containing protein, putative	227.857	5.34855	1.29509	4.12988	3.62945e-05	0.000528805
PVP01_0921300		conserved Plasmodium protein, unknown function	593.8	5.25524	1.27292	4.12848	3.65164e-05	0.000530555
PVP01_0526400		conserved Plasmodium protein, unknown function	221.544	7.48757	1.81842	4.11763	3.82795e-05	0.000554628
PVP01_1409500		conserved Plasmodium protein, unknown function	53.8241	2.81948	0.68584	4.11098	3.93983e-05	0.000569256
PVP01_1008700	ACS10	acyl-CoA synthetase, putative	148.806	-3.34566	0.814034	-4.10998	3.95695e-05	0.000570151
PVP01_1206400		conserved Plasmodium protein, unknown function	353.586	4.13481	1.00687	4.10662	4.01493e-05	0.000576911
PVP01_1130200		conserved Plasmodium protein, unknown function	128.445	2.68269	0.654635	4.09799	4.16752e-05	0.000597192
PVP01_1017500	MFS1	major facilitator superfamily domain-containing protein, putative	75.1104	4.45794	1.08924	4.0927	4.26383e-05	0.000604351
PVP01_1412500	RPT1	26S protease regulatory subunit 7, putative	76.6795	-2.68253	0.655423	-4.09282	4.26155e-05	0.000604351
PVP01_0949800		Plasmodium exported protein, unknown function	8.12675	6.84317	1.6715	4.09403	4.23934e-05	0.000604351
PVP01_1320100		CPW-WPC family protein	86.2971	4.51416	1.10277	4.09347	4.24973e-05	0.000604351
PVP01_1327600		conserved Plasmodium protein, unknown function	42.0986	2.78666	0.682209	4.08476	4.41218e-05	0.000621998
PVP01_1334600		60S ribosomal protein L10, putative	218.381	-2.29706	0.562306	-4.08507	4.40636e-05	0.000621998
PVP01_1138600		peptidyl-tRNA hydrolase PTRHD1, putative	17.3546	-3.56093	0.87241	-4.08172	4.47041e-05	0.000628508
PVP01_1232500	SET2	histone-lysine N-methyltransferase SET2, putative	608.417	2.56113	0.627992	4.07829	4.5369e-05	0.000636142
PVP01_0508500		conserved Plasmodium protein, unknown function	198.857	5.73424	1.4071	4.07521	4.59731e-05	0.000642884
PVP01_0622100	ERH	enhancer of rudimentary homolog, putative	26.2815	-4.02014	0.986816	-4.07385	4.62432e-05	0.000643213
PVP01_0604600		60S ribosomal protein L30e, putative	153.136	-2.22372	0.54579	-4.07431	4.61507e-05	0.000643213
PVP01_1465700		conserved Plasmodium protein, unknown function	50.0356	2.67788	0.658037	4.0695	4.7115e-05	0.000653596
PVP01_1030600	SRSF12	serine/arginine-rich splicing factor 12, putative	114.178	-1.77219	0.43556	-4.06877	4.72628e-05	0.000653906
PVP01_0304400	DDX51	ATP-dependent RNA helicase DDX51, putative	33.8393	-2.77073	0.682843	-4.05764	4.95713e-05	0.000684032
PVP01_0707400		conserved Plasmodium protein, unknown function	41.8856	-2.64994	0.653734	-4.05354	5.04484e-05	0.000694298
PVP01_1235100		conserved Plasmodium protein, unknown function	88.7688	5.65349	1.39683	4.04738	5.17932e-05	0.000709869
PVP01_1223200		CPW-WPC family protein	87.8617	4.31225	1.06551	4.04712	5.1852e-05	0.000709869
PVP01_1400600		Plasmodium exported protein, unknown function, pseudogene	12.2798	5.72547	1.41578	4.04404	5.25387e-05	0.000714511
PVP01_1314300		conserved Plasmodium protein, unknown function	37.1243	3.89064	0.962077	4.044	5.25473e-05	0.000714511
PVP01_0211800		aspartate--tRNA ligase, putative	133.007	-3.67979	0.909992	-4.04375	5.26021e-05	0.000714511
PVP01_0931200	RPT5	26S protease regulatory subunit 6A, putative	99.6625	-2.41345	0.597481	-4.03938	5.35934e-05	0.000726087
PVP01_1003900		conserved Plasmodium protein, unknown function	52.9401	3.08404	0.764687	4.03308	5.50499e-05	0.000743887
PVP01_1448900	SEC13	protein transport protein SEC13, putative	62.4835	-2.55751	0.634756	-4.02912	5.59871e-05	0.000753058
PVP01_1336300		deoxyhypusine synthase, putative	18.3007	-4.30215	1.0678	-4.02899	5.60174e-05	0.000753058
PVP01_1322600	PEPC	phosphoenolpyruvate carboxylase, putative	35.8926	-4.33008	1.07532	-4.02677	5.65472e-05	0.000758227
PVP01_0833500		membrane magnesium transporter, putative	28.3666	-3.61438	0.897979	-4.02502	5.69706e-05	0.000761946
PVP01_1101200		PIR protein, pseudogene	14.4396	4.98041	1.24043	4.01508	5.94261e-05	0.000791517
PVP01_1459900		rab GDP dissociation inhibitor beta, putative	87.7802	-2.40102	0.598036	-4.01484	5.94852e-05	0.000791517
PVP01_0900600		PIR protein	26.7833	-5.33491	1.32976	-4.01194	6.02219e-05	0.00079928
PVP01_1340400		40S ribosomal protein S8e, putative	279.475	-2.42209	0.603824	-4.01125	6.03992e-05	0.0007996
PVP01_0527700		conserved Plasmodium protein, unknown function	523.999	2.52598	0.630676	4.0052	6.19645e-05	0.000818245
PVP01_0704300	SEC27	coatomer subunit beta, putative	83.4894	-4.16377	1.04063	-4.00119	6.30259e-05	0.000828068
PVP01_0202100		Plasmodium exported protein, unknown function	67.7	3.06545	0.766101	4.00137	6.29769e-05	0.000828068
PVP01_0004390		PIR protein	9.06953	-6.34911	1.58831	-3.99739	6.40441e-05	0.000839331
PVP01_0504200	TRAG7	tryptophan-rich protein	94.324	2.80368	0.7019	3.99442	6.48539e-05	0.000847814
PVP01_0941800		conserved Plasmodium protein, unknown function	109.798	4.34274	1.0877	3.99259	6.53552e-05	0.000852231
PVP01_1442400		BRO1 domain-containing protein, putative	181.554	3.49024	0.876661	3.98129	6.85418e-05	0.000891556
PVP01_0721000	PGK	phosphoglycerate kinase, putative	898.744	-2.53808	0.637748	-3.97975	6.89869e-05	0.000895114
PVP01_1112500	CELF1	CUGBP Elav-like family member 1, putative	150.168	-1.97829	0.498409	-3.96922	7.21094e-05	0.000933307
PVP01_0109700		cloroquine resistance asscociatd protein Cg7, putative	138.31	2.99548	0.754816	3.96849	7.2328e-05	0.000933819
PVP01_0004360		PIR protein	8.03637	-5.20227	1.31474	-3.95687	7.59373e-05	0.000977998
PVP01_1425600		conserved Plasmodium protein, unknown function	14.9068	6.06578	1.53352	3.95546	7.63887e-05	0.000981388
PVP01_0940200		AAA family ATPase, putative	16.3014	6.94076	1.75946	3.94481	7.9863e-05	0.0010235
PVP01_1324800		60S ribosomal protein L5, putative	407.209	-2.19082	0.55587	-3.94124	8.10609e-05	0.00103631
PVP01_1409300	RPS27	40S ribosomal protein S27, putative	57.5525	-3.10701	0.788633	-3.93974	8.1569e-05	0.00104025
PVP01_0934800	HSP70-3	heat shock protein 70, putative	246.388	-1.90787	0.484892	-3.93462	8.33279e-05	0.00106009
PVP01_0300900		Plasmodium exported protein, unknown function	11.9046	3.47666	0.884058	3.93261	8.40292e-05	0.0010652
PVP01_1324700		60S ribosomal protein L7-3, putative	455.715	-1.86019	0.473055	-3.9323	8.41374e-05	0.0010652
PVP01_1336100	NMT	glycylpeptide N-tetradecanoyltransferase, putative	28.4766	-4.06931	1.03563	-3.9293	8.51952e-05	0.00107598
PVP01_0318600		conserved Plasmodium protein, unknown function	37.0362	2.71666	0.692036	3.9256	8.65142e-05	0.00109
PVP01_0503400	TRAG4	tryptophan-rich protein	6.78943	6.62001	1.69081	3.9153	9.02937e-05	0.0011328
PVP01_1305600		Tat binding protein 1(TBP-1)-interacting protein, putative	15.2645	4.50046	1.1495	3.91515	9.03464e-05	0.0011328
PVP01_0914200	DSK2	ubiquitin domain-containing protein DSK2, putative	61.1896	-2.63175	0.673982	-3.90477	9.43141e-05	0.00117972
PVP01_1323300	RPL21	60S ribosomal protein L21, putative	181.369	-3.28215	0.841492	-3.9004	9.6034e-05	0.00119598
PVP01_1417600		conserved Plasmodium protein, unknown function	16.5904	2.94701	0.755585	3.9003	9.6073e-05	0.00119598
PVP01_0910200	ENP1	essential nuclear protein 1, putative	96.4814	-2.06231	0.528927	-3.89906	9.65681e-05	0.00119849
PVP01_0932300		conserved Plasmodium protein, unknown function	38.453	5.15091	1.32121	3.89864	9.67343e-05	0.00119849
PVP01_1450100		conserved Plasmodium protein, unknown function	60.5181	-2.63104	0.675196	-3.8967	9.75133e-05	0.00120528
PVP01_0524600		Plasmodium exported protein (PHIST), unknown function	19.331	4.39954	1.12981	3.89406	9.85783e-05	0.0012127
PVP01_1002000		PIR protein	10.7672	-6.5638	1.6855	-3.89428	9.84906e-05	0.0012127
PVP01_1240600		conserved Plasmodium protein, unknown function	114.266	4.21689	1.08327	3.89274	9.91192e-05	0.00121648
PVP01_1456100		COPI associated protein, putative	15.7741	3.65091	0.938139	3.89165	9.95657e-05	0.0012191
PVP01_0001440		Plasmodium exported protein (PHIST), unknown function	766.217	1.96208	0.504674	3.88781	0.000101151	0.00123561
PVP01_1447900		conserved Plasmodium protein, unknown function	100.041	2.52632	0.649928	3.88707	0.00010146	0.00123649
PVP01_0611300		conserved Plasmodium protein, unknown function	49.9617	4.04189	1.04046	3.8847	0.000102455	0.0012457
PVP01_1253200	GluPho	glucose-6-phosphate dehydrogenase-6-phosphogluconolactonase, putative	74.6921	-2.0491	0.527581	-3.88395	0.000102774	0.00124667
PVP01_1026700	PIMMS2	PIMMS2 protein, putative	14.0203	4.10682	1.05922	3.87722	0.000105658	0.00127613
PVP01_1340000		WD repeat-containing protein, putative	19.0923	-4.03873	1.04168	-3.87714	0.000105692	0.00127613
PVP01_0726500	COX6B	cytochrome c oxidase subunit 6B, putative	16.4889	3.3528	0.865237	3.875	0.000106623	0.0012844
PVP01_0005740		PIR protein	6.6552	6.54806	1.69051	3.87343	0.000107314	0.00128974
PVP01_1210100		conserved Plasmodium protein, unknown function	48.9984	-2.50235	0.64641	-3.87115	0.000108322	0.00129887
PVP01_0948100		protein farnesyltransferase subunit beta, putative	29.6634	-4.46854	1.15459	-3.87024	0.000108727	0.00130074
PVP01_0000060		Plasmodium exported protein, unknown function	10.9927	5.59092	1.4454	3.86806	0.000109702	0.0013094
PVP01_0520400	USP13	ubiquitin carboxyl-terminal hydrolase 13, putative	97.2028	-3.02323	0.781842	-3.8668	0.000110272	0.00131319
PVP01_0703000		ubiquitin specific protease, putative	61.4289	-2.37826	0.615237	-3.86561	0.000110814	0.00131664
PVP01_1240500	RPN2	26S proteasome regulatory subunit RPN2, putative	290.531	-1.80233	0.466405	-3.86431	0.000111405	0.00131766
PVP01_0902700		hypothetical protein	7.23002	-6.06607	1.56961	-3.8647	0.000111224	0.00131766
PVP01_0734400		Plasmodium exported protein, unknown function	75.46	2.50922	0.649624	3.86257	0.000112201	0.00132407
PVP01_0005750		PIR protein, pseudogene	13.4617	5.71195	1.47962	3.86042	0.000113192	0.00133276
PVP01_1339300		conserved Plasmodium protein, unknown function	463.632	2.1317	0.552506	3.85823	0.00011421	0.00134171
PVP01_1302800	SUA5	threonylcarbamoyl-AMP synthase, putative	57.4948	-2.21974	0.575917	-3.85427	0.000116073	0.00136054
PVP01_1111000	PRMT5	protein arginine N-methyltransferase 5, putative	25.6578	-3.45547	0.8972	-3.8514	0.000117446	0.00137107
PVP01_1448300	TLAP1	thioredoxin-like associated protein 1, putative	65.2219	4.86414	1.26299	3.85129	0.000117498	0.00137107
PVP01_1263700	LSM5	U6 snRNA-associated Sm-like protein LSm5, putative	8.97404	-6.32289	1.64247	-3.84962	0.0001183	0.00137735
PVP01_0304500	SEC24B	protein transport protein Sec24B, putative	84.9175	-2.31694	0.602507	-3.8455	0.000120309	0.00139762
PVP01_0617100	RimM	ribosome maturation factor RimM, putative	36.7336	-2.48709	0.646992	-3.84409	0.000121003	0.00140256
PVP01_1228200		conserved Plasmodium protein, unknown function	31.2557	5.60605	1.45955	3.84095	0.000122558	0.00141429
PVP01_1235200		conserved Plasmodium protein, unknown function	119.484	4.39763	1.14491	3.84101	0.00012253	0.00141429
PVP01_0623200		Plasmodium exported protein, unknown function	28.5311	6.50586	1.69535	3.83748	0.000124302	0.00143126
PVP01_1332200		conserved Plasmodium protein, unknown function	17.9359	5.31534	1.38538	3.83673	0.000124685	0.00143251
PVP01_1469600		PIR protein	19.819	4.50271	1.17602	3.82876	0.00012879	0.00147641
PVP01_0611900	RPS2	40S ribosomal protein S2, putative	281.701	-2.44643	0.639512	-3.82547	0.000130524	0.00149301
PVP01_1266800	PBGS	porphobilinogen synthase, putative	9.97661	-4.90263	1.28231	-3.82328	0.00013169	0.001501
PVP01_0828000		tetratricopeptide repeat protein, putative	91.3457	3.67139	0.960325	3.82307	0.000131798	0.001501
PVP01_1245400		phosphatidylinositol-4-phosphate 5-kinase, putative	39.6775	3.36826	0.882655	3.81605	0.000135602	0.00154096
PVP01_1271500		lysophospholipase, putative	76.5208	1.9665	0.515963	3.81133	0.000138221	0.00156731
PVP01_0935700		conserved Plasmodium protein, unknown function	54.7852	3.08609	0.810984	3.80537	0.000141595	0.00160208
PVP01_1117300	ADSS	adenylosuccinate synthetase, putative	95.5402	-2.44626	0.643586	-3.80098	0.000144126	0.0016245
PVP01_0836100	IMC1e	inner membrane complex protein 1e, putative	60.7082	3.75584	0.988157	3.80085	0.0001442	0.0016245
PVP01_1324500		small nucleolar RNA snoR28	21.6963	-3.96752	1.04468	-3.79785	0.000145958	0.00164036
PVP01_1034800		PIR protein	7.61282	-6.08087	1.60133	-3.79738	0.000146236	0.00164036
PVP01_1017700		tRNA pseudouridine synthase, putative	40.475	-3.84387	1.01314	-3.79403	0.000148223	0.00165908
PVP01_1445700	SOC2	protein SOC2, putative	243.5	2.61199	0.6895	3.78823	0.000151725	0.00169464
PVP01_0604100		conserved Plasmodium protein, unknown function	46.5418	3.24166	0.855911	3.78739	0.000152241	0.00169677
PVP01_0421300		conserved Plasmodium protein, unknown function	125.903	3.06125	0.808675	3.78551	0.000153396	0.001706
PVP01_1139200	DHHC2	palmitoyltransferase DHHC2, putative	28.6212	4.80517	1.26996	3.78372	0.0001545	0.00171463
PVP01_0315000	ARP6	actin-related protein, putative	59.8019	-2.16173	0.571519	-3.78243	0.000155306	0.00171991
PVP01_0413900		conserved Plasmodium protein, unknown function	38.5158	-3.88039	1.02673	-3.77935	0.000157236	0.00173759
PVP01_1319600		coatomer subunit beta, putative	167.251	-2.27423	0.602184	-3.77663	0.000158963	0.0017501
PVP01_1102400		conserved Plasmodium protein, unknown function	32.9245	-4.12767	1.09299	-3.77651	0.000159039	0.0017501
PVP01_0003320		PIR protein	13.3104	-6.85676	1.81866	-3.77023	0.000163099	0.00179099
PVP01_1016500		UTP--glucose-1-phosphate uridylyltransferase, putative	58.7614	6.21904	1.65068	3.76756	0.000164852	0.00180645
PVP01_1117900		proteasome subunit alpha type-4, putative	54.1664	-2.55538	0.678653	-3.76537	0.000166304	0.00181853
PVP01_0310300		conserved Plasmodium protein, unknown function	373.367	4.49055	1.19359	3.76221	0.00016842	0.00183782
PVP01_0202000		hypothetical protein	301.264	7.9759	2.1218	3.75903	0.000170572	0.00185742
PVP01_0927500		RNA-binding protein, putative	89.6512	4.1684	1.11012	3.7549	0.000173414	0.00188443
PVP01_1208000	P47	6-cysteine protein	138.3	4.77107	1.27297	3.74798	0.000178266	0.00193313
PVP01_1407800	SNRPA	U1 small nuclear ribonucleoprotein A, putative	25.942	-2.37811	0.635116	-3.74437	0.00018085	0.00195303
PVP01_0000130	TRAG28	tryptophan-rich protein	1126.11	1.86382	0.497707	3.74482	0.000180526	0.00195303
PVP01_0409200	ORC5	origin recognition complex subunit 5, putative	44.0964	2.48849	0.664786	3.7433	0.000181617	0.00195322
PVP01_0522900		Plasmodium exported protein (PHIST), unknown function, pseudogene	9.53746	5.35802	1.43123	3.74366	0.000181362	0.00195322
PVP01_1019800	UvrD	ATP-dependent DNA helicase UvrD, putative	46.0172	2.24933	0.601128	3.74185	0.000182668	0.00196049
PVP01_1317200		conserved Plasmodium protein, unknown function	109.635	1.79084	0.479134	3.73766	0.000185741	0.0019842
PVP01_0803800		60S ribosomal protein L13, putative	178.299	-2.23202	0.59723	-3.73728	0.000186019	0.0019842
PVP01_0832400		conserved Plasmodium protein, unknown function	22.4969	-3.91021	1.04626	-3.73733	0.000185984	0.0019842
PVP01_0623300		Plasmodium exported protein, unknown function	61.4905	-3.92224	1.04975	-3.73635	0.000186713	0.00198754
PVP01_0107400		conserved Plasmodium protein, unknown function	70.8938	-2.18276	0.584552	-3.73408	0.000188404	0.00200145
PVP01_0706200		proteasome activator 28 subunit beta, putative	47.2259	-3.89738	1.04445	-3.7315	0.000190346	0.00201798
PVP01_0831600	PRPF19	pre-mRNA-processing factor 19, putative	52.1837	-2.64503	0.709148	-3.72987	0.000191582	0.00202696
PVP01_0202800		5.8S ribosomal RNA	74.8685	-4.25227	1.14062	-3.72804	0.000192973	0.00203754
PVP01_0946100	DYN1	dynamin-like protein, putative	86.2926	-1.90508	0.511372	-3.72542	0.00019499	0.00204641
PVP01_1233400		conserved Plasmodium protein, unknown function	9.38249	7.11137	1.90874	3.72568	0.000194787	0.00204641
PVP01_1029500		MOLO1 domain-containing protein, putative	94.8336	6.98443	1.87472	3.72559	0.00019486	0.00204641
PVP01_1147800		Plasmodium exported protein, unknown function	188.264	6.11039	1.64078	3.72408	0.000196028	0.00205046
PVP01_0404400		Plasmodium exported protein, unknown function	11.4532	4.05714	1.08963	3.7234	0.000196555	0.00205046
PVP01_1030800		hypothetical protein	64.6136	2.78758	0.748648	3.72349	0.000196488	0.00205046
PVP01_0839100		PIR protein	10.4363	7.262	1.95108	3.72204	0.000197617	0.00205742
PVP01_0700300		Plasmodium exported protein, unknown function	11.3897	7.38551	1.98568	3.71939	0.000199701	0.00207498
PVP01_0320100	PAM18	mitochondrial import inner membrane translocase subunit TIM14, putative	8.51449	-5.29693	1.42494	-3.71731	0.000201356	0.00208388
PVP01_0524900		Plasmodium exported protein (PHIST), unknown function	39.1607	6.90298	1.85674	3.71779	0.000200974	0.00208388
PVP01_0105000	PPM12	protein phosphatase PPM12, putative	18.1021	2.72169	0.735381	3.70107	0.000214696	0.00221753
PVP01_1110900	SEC24A	protein transport protein Sec24A, putative	91.6628	-2.56109	0.692338	-3.69919	0.000216291	0.00222959
PVP01_0949600		PIR protein	39.714	-2.4099	0.651713	-3.69779	0.000217483	0.00223746
PVP01_1113100	RPS15	40S ribosomal protein S15, putative	97.7706	-2.43321	0.658363	-3.69584	0.000219158	0.00224375
PVP01_1013000	SAHH	adenosylhomocysteinase, putative	192.011	-2.87875	0.778971	-3.69558	0.000219385	0.00224375
PVP01_1426400		40S ribosomal protein S16, putative	170.474	-2.43899	0.659861	-3.69622	0.000218836	0.00224375
PVP01_1412800	M1AAP	M1-family alanyl aminopeptidase, putative	906.034	-1.73796	0.470589	-3.69316	0.000221484	0.00225637
PVP01_0610600		conserved Plasmodium protein, unknown function	21.5806	4.46121	1.20789	3.69339	0.00022128	0.00225637
PVP01_0203000	MRP1	multidrug resistance-associated protein 1, putative	48.9733	-2.42482	0.656724	-3.6923	0.000222238	0.00225964
PVP01_1415000		conserved Plasmodium protein, unknown function	39.6606	-2.60265	0.70689	-3.68184	0.00023156	0.00234534
PVP01_0523300		Plasmodium exported protein (PHIST), unknown function	89.0537	-3.37392	0.916371	-3.68183	0.000231567	0.00234534
PVP01_0210000	MFR2	major facilitator superfamily-related transporter, putative	34.4031	4.19889	1.14173	3.67767	0.000235378	0.00237933
PVP01_0602600	PMM	phosphomannomutase, putative	29.5784	3.92457	1.06778	3.67543	0.000237445	0.00239096
PVP01_1127400		conserved Plasmodium protein, unknown function	11.4394	5.50892	1.49877	3.67562	0.000237275	0.00239096
PVP01_1446900		conserved Plasmodium protein, unknown function	39.2828	2.58552	0.703576	3.67483	0.000238006	0.00239198
PVP01_1270400	CCp1	LCCL domain-containing protein	440.153	5.74481	1.56425	3.67257	0.000240121	0.0024086
PVP01_1259400		conserved Plasmodium protein, unknown function	45.07	5.64346	1.53758	3.67036	0.000242211	0.0024249
PVP01_0407200	RPS26	40S ribosomal protein S26, putative	123.656	-2.30733	0.628843	-3.66916	0.000243347	0.0024316
PVP01_0718700		conserved Plasmodium protein, unknown function	33.9797	3.84847	1.04961	3.66657	0.000245827	0.00245087
PVP01_0202900		18S ribosomal RNA	41756.9	2.79509	0.7624	3.66617	0.000246214	0.00245087
PVP01_0819900	CCT5	T-complex protein 1 subunit epsilon, putative	105.371	-2.23609	0.610741	-3.66127	0.000250965	0.00248966
PVP01_1020000		conserved Plasmodium protein, unknown function	45.6498	2.00489	0.54761	3.66117	0.000251066	0.00248966
PVP01_0937100		conserved Plasmodium protein, unknown function	11.7158	3.87986	1.06013	3.65981	0.000252403	0.00249813
PVP01_1131200		60S ribosomal protein L27a, putative	271.856	-2.05938	0.562776	-3.65933	0.000252878	0.00249813
PVP01_1145500	TEX1	trophozoite exported protein 1, putative	97.23	-1.82297	0.498408	-3.65759	0.000254602	0.00251041
PVP01_1337100		conserved Plasmodium protein, unknown function	25.5961	-3.50797	0.960693	-3.6515	0.000260716	0.00256584
PVP01_0816300		Rab3 GTPase-activating protein non-catalytic subunit, putative	51.4243	-2.06695	0.56651	-3.64857	0.000263703	0.00259035
PVP01_0919500		conserved Plasmodium protein, unknown function	41.8557	3.34623	0.917268	3.64804	0.00026425	0.00259084
PVP01_0000180		Plasmodium exported protein, unknown function	13.9795	3.7794	1.03733	3.64339	0.000269068	0.00263313
PVP01_1433600		conserved Plasmodium protein, unknown function	47.3545	6.32211	1.73604	3.64168	0.000270861	0.00264571
PVP01_0119300		Plasmodium exported protein, unknown function	6.67152	6.52215	1.79208	3.63942	0.000273253	0.00266409
PVP01_1132100	TOM40	mitochondrial import receptor subunit TOM40, putative	62.9239	-1.81697	0.499391	-3.63838	0.000274362	0.00266991
PVP01_0828100		E3 ubiquitin-protein ligase, putative	131.863	1.51391	0.416264	3.63689	0.000275946	0.00268032
PVP01_1017200	AP2-O2	AP2 domain transcription factor AP2-O2, putative	403.751	3.73518	1.0281	3.63311	0.000280027	0.0027149
PVP01_0610300	GFPT	glutamine--fructose-6-phosphate aminotransferase [isomerizing], putative	119.656	2.45725	0.677506	3.62691	0.000286837	0.00277283
PVP01_1121400		HECT-domain (ubiquitin-transferase), putative	474.811	3.45028	0.951354	3.6267	0.000287065	0.00277283
PVP01_0835800	RPL44	60S ribosomal protein L44, putative	108.12	-2.39684	0.661307	-3.6244	0.000289636	0.00279249
PVP01_1115100	ARK3	serine/threonine protein kinase, putative	116.267	3.37679	0.932165	3.62252	0.000291746	0.00279285
PVP01_0119200	CVC-81-95	Plasmodium exported protein (PHISTc), unknown function	5680.82	1.25782	0.347223	3.62253	0.000291739	0.00279285
PVP01_0317400	PSOP1	secreted ookinete protein, putative	94.3459	4.42225	1.22036	3.62371	0.000290405	0.00279285
PVP01_1346100	SR140	U2 snRNP-associated SURP motif-containing protein, putative	85.1921	-1.95327	0.539211	-3.62246	0.000291815	0.00279285
PVP01_0706100		translation initiation factor SUI1, putative	49.2663	-2.25241	0.621925	-3.62167	0.000292709	0.00279629
PVP01_1003500		conserved Plasmodium protein, unknown function	18.5037	-4.35269	1.20208	-3.62096	0.000293512	0.00279883
PVP01_0830600		60S acidic ribosomal protein P2, putative	238.12	-2.05568	0.568547	-3.61566	0.000299578	0.00285146
PVP01_1114800		elongation factor 1-alpha, putative	90.5407	-2.72021	0.752539	-3.6147	0.000300691	0.00285684
PVP01_1241100	PM8	plasmepsin VIII, putative	19.8534	6.31894	1.74852	3.61388	0.000301649	0.00286073
PVP01_1448500	SPM2	subpellicular microtubule protein 2, putative	17.5098	4.92975	1.36628	3.60815	0.000308391	0.00291936
PVP01_1420800	PRP2	golgi protein 1, putative	99.5441	-2.23587	0.620075	-3.6058	0.000311192	0.00294054
PVP01_0319000		conserved Plasmodium protein, unknown function	68.3703	4.56422	1.26628	3.60444	0.000312826	0.00294635
PVP01_1462700		kinesin, putative	107.871	2.26372	0.628051	3.60435	0.000312937	0.00294635
PVP01_0813200	UTP13	U3 small nucleolar RNA-associated protein 13, putative	53.8896	-2.53703	0.70422	-3.60261	0.000315038	0.00296079
PVP01_0828400		conserved Plasmodium protein, unknown function	40.9107	2.34243	0.650385	3.60161	0.000316256	0.00296689
PVP01_0531200	EIF4A3	eukaryotic initiation factor 4A-III, putative	67.8454	-2.10173	0.584152	-3.59792	0.000320768	0.00300381
PVP01_0824500		zinc finger protein, putative	90.215	2.83769	0.788939	3.59684	0.000322105	0.00301093
PVP01_1303600		conserved Plasmodium protein, unknown function	51.8237	5.10731	1.42249	3.5904	0.000330172	0.00307833
PVP01_0408000		conserved Plasmodium protein, unknown function	64.1343	3.00702	0.837576	3.59014	0.000330495	0.00307833
PVP01_1456600		conserved Plasmodium protein, unknown function	176.374	3.47138	0.967065	3.5896	0.000331188	0.00307928
PVP01_1120600		RAP protein, putative	31.789	-3.77734	1.05262	-3.58852	0.000332561	0.00308655
PVP01_1240300		conserved Plasmodium protein, unknown function	41.4762	3.40131	0.949079	3.5838	0.000338636	0.00313735
PVP01_0828500	PM6	plasmepsin VI, putative	56.5964	5.09685	1.42256	3.58289	0.000339817	0.0031427
PVP01_1005600	EIF3E	eukaryotic translation initiation factor 3 subunit E, putative	67.3749	-3.74004	1.04503	-3.57888	0.000345072	0.00317442
PVP01_0906200	RPS4	40S ribosomal protein S4, putative	141.759	-2.65165	0.74076	-3.57963	0.000344077	0.00317442
PVP01_1006200		conserved Plasmodium protein, unknown function	15.3236	4.33564	1.21138	3.57909	0.000344788	0.00317442
PVP01_1308100		conserved Plasmodium protein, unknown function	15.778	-3.93353	1.09957	-3.57734	0.000347114	0.00318759
PVP01_0409000		DEAD/DEAH box helicase, putative	81.5206	3.61642	1.01122	3.5763	0.000348488	0.00319457
PVP01_1270900		hypothetical protein	14.7499	4.6716	1.30833	3.57066	0.000356083	0.00325847
PVP01_0115400		conserved Plasmodium protein, unknown function	48.7994	5.37787	1.50923	3.56333	0.000366186	0.00333688
PVP01_0832300		conserved Plasmodium protein, unknown function	376.003	2.81002	0.788608	3.56327	0.000366269	0.00333688
PVP01_1412200		alternative splicing regulator, putative	9.31108	-3.72978	1.04679	-3.56305	0.000366571	0.00333688
PVP01_1218000		conserved Plasmodium protein, unknown function	35.5179	2.27585	0.638868	3.56231	0.000367604	0.00334046
PVP01_0811700		conserved Plasmodium protein, unknown function	11.6555	-5.12871	1.44042	-3.56057	0.000370046	0.0033568
PVP01_1253300	P23	co-chaperone p23, putative	188.681	-1.4596	0.410941	-3.55184	0.000382545	0.00346416
PVP01_0203800	GEXP19	conserved Plasmodium protein, unknown function	28.0707	3.7915	1.06782	3.55069	0.000384217	0.00347327
PVP01_0520100	RPT3	26S protease regulatory subunit 6B, putative	60.2748	-3.67623	1.03608	-3.54823	0.000387834	0.0034999
PVP01_0706600		apicoplast integral membrane protein, putative	13.27	3.62768	1.02254	3.54771	0.000388596	0.00350072
PVP01_0813300		conserved Plasmodium protein, unknown function	101.515	2.00881	0.567114	3.54217	0.000396852	0.00356893
PVP01_1447500	MIF	macrophage migration inhibitory factor, putative	80.4749	-2.72979	0.771669	-3.53752	0.000403904	0.00362609
PVP01_1214400		conserved Plasmodium protein, unknown function	14.0759	5.72274	1.61852	3.53579	0.000406561	0.00364368
PVP01_1268900		translocation protein sec62, putative	87.9704	-1.79782	0.509453	-3.52891	0.000417274	0.00373328
PVP01_0502800		PIR protein	11.7796	3.93807	1.11629	3.52782	0.000419001	0.00374231
PVP01_1121300	PK4	eukaryotic translation initiation factor 2-alpha kinase, putative	145.213	-1.58549	0.449621	-3.52629	0.000421427	0.00375113
PVP01_1033000	VPS11	vacuolar protein sorting-associated protein 11, putative	26.058	-2.50666	0.710804	-3.5265	0.000421084	0.00375113
PVP01_1423000		conserved Plasmodium protein, unknown function	608.959	-1.39958	0.397251	-3.52318	0.000426403	0.00378482
PVP01_1009800		conserved Plasmodium protein, unknown function	21.3913	-3.0852	0.875727	-3.52302	0.000426663	0.00378482
PVP01_0909000	DTD	D-tyrosyl-tRNA(Tyr) deacylase, putative	11.8202	-4.36486	1.24015	-3.51962	0.00043216	0.00382708
PVP01_0620000	MRScyt	methionine--tRNA ligase, putative	156.054	-2.4181	0.687578	-3.51684	0.000436718	0.00385435
PVP01_0410800	SEC31	protein transport protein SEC31, putative	143.865	-1.91481	0.544468	-3.51686	0.00043669	0.00385435
PVP01_0410300		serine/threonine protein kinase, putative	36.8036	2.70568	0.769713	3.51518	0.00043945	0.00387191
PVP01_0215900		AP-4 complex subunit beta, putative	34.2643	-3.18851	0.90746	-3.51367	0.000441963	0.00388748
PVP01_0213700		eukaryotic translation initiation factor 2 subunit alpha, putative	83.0487	-2.74111	0.780355	-3.51265	0.000443668	0.00389591
PVP01_0618200	AdoMetDC/ODC	S-adenosylmethionine decarboxylase/ornithine decarboxylase, putative	916.952	-1.66897	0.475242	-3.51184	0.000445013	0.00390116
PVP01_0920300		conserved Plasmodium protein, unknown function	24.9802	2.32547	0.662763	3.50875	0.000450214	0.00394013
PVP01_0217100		Plasmodium exported protein, unknown function	68.8841	2.0746	0.591611	3.50669	0.000453714	0.00396411
PVP01_0603400	PPP8	serine/threonine protein phosphatase 8, putative	183.155	2.65202	0.757962	3.49888	0.000467213	0.00407523
PVP01_1135200	myoE	myosin E, putative	59.7227	4.04298	1.15767	3.49233	0.000478825	0.00415269
PVP01_0802200	TRA2B	transformer-2 protein homolog beta, putative	54.8189	-1.8453	0.528385	-3.49233	0.000478827	0.00415269
PVP01_1206800		conserved Plasmodium protein, unknown function	26.2731	4.00523	1.14662	3.49306	0.000477511	0.00415269
PVP01_0003060		PIR protein	7.23724	-6.00259	1.71892	-3.49208	0.000479279	0.00415269
PVP01_1469800	TRAG22	tryptophan-rich protein	122.695	1.82211	0.521885	3.49141	0.000480485	0.00415589
PVP01_0528200		MOLO1 domain-containing protein, putative	31.0658	4.59168	1.3153	3.49099	0.000481242	0.00415589
PVP01_1263500	PARN	poly(A)-specific ribonuclease PARN, putative	38.1588	-2.76135	0.791762	-3.4876	0.000487373	0.00420188
PVP01_0922800		cupin-like protein, putative	12.829	-3.59424	1.03087	-3.48659	0.00048922	0.00421084
PVP01_0422000		protein kinase, putative	35.9132	4.09061	1.1734	3.48613	0.000490066	0.00421118
PVP01_0735100		Plasmodium exported protein, unknown function	19.1012	8.11571	2.32863	3.48518	0.000491804	0.00421916
PVP01_1017600	PhLP3	phosducin-like protein, putative	114.949	1.57453	0.452708	3.47802	0.000505131	0.00432637
PVP01_0937700		DnaJ protein, putative	23.2073	-3.34878	0.963517	-3.47558	0.000509743	0.00435872
PVP01_0418100	IscA1	iron-sulfur assembly protein, putative	7.13682	-3.9825	1.14649	-3.47363	0.000513462	0.00438334
PVP01_0719700		conserved Plasmodium protein, unknown function	135.86	-1.51836	0.437318	-3.47197	0.000516647	0.00440332
PVP01_1132500		conserved protein, unknown function	83.7091	3.63744	1.04819	3.47021	0.000520048	0.00442507
PVP01_1130000	ACS12	acyl-CoA synthetase, putative	158.417	-2.64258	0.76196	-3.46814	0.000524074	0.00445207
PVP01_1230100		DEAD box helicase, putative	24.8573	2.21093	0.638727	3.46146	0.000537246	0.00454973
PVP01_1460300		conserved Plasmodium protein, unknown function	6.40896	-4.24274	1.22572	-3.46143	0.000537315	0.00454973
PVP01_0608300		dynein heavy chain, putative	1046.22	1.90706	0.551075	3.46062	0.000538932	0.00455603
PVP01_0708400		helicase SKI2W, putative	39.8663	-2.27442	0.657571	-3.45882	0.00054254	0.0045791
PVP01_0923400	CDPK6	calcium-dependent protein kinase 6, putative	36.7058	3.03039	0.877767	3.45238	0.000555663	0.00467507
PVP01_1020600	PNP	purine nucleoside phosphorylase, putative	356.028	-2.74633	0.795492	-3.45236	0.000555702	0.00467507
PVP01_0623600		PIR protein	32.4273	5.78134	1.67546	3.4506	0.000559341	0.0046981
PVP01_1410400		HORMA domain protein, putative	90.4821	2.97524	0.862685	3.44881	0.00056306	0.00472174
PVP01_0715100	HoMu	RNA-binding protein musashi, putative	116.171	2.03467	0.590361	3.44648	0.000567944	0.00475505
PVP01_1007700		conserved Plasmodium protein, unknown function	11.3571	-3.58698	1.04095	-3.44588	0.00056921	0.00475801
PVP01_0942300	DPM1	dolichol-phosphate mannosyltransferase, putative	13.1283	3.29265	0.956213	3.44343	0.000574386	0.0047936
PVP01_0404900		Plasmodium exported protein, unknown function	47.4291	3.49307	1.01471	3.44242	0.000576528	0.00479874
PVP01_0822100		conserved Plasmodium protein, unknown function	36.5015	3.37007	0.979024	3.44228	0.000576843	0.00479874
PVP01_0926200	SNRPD1	small nuclear ribonucleoprotein Sm D1, putative	30.1336	-4.149	1.20623	-3.43963	0.000582506	0.00483044
PVP01_0949100		Plasmodium exported protein, unknown function	15.4409	-3.91104	1.13692	-3.44002	0.000581673	0.00483044
PVP01_0710900		SAP domain-containing protein, putative	96.7801	1.8407	0.535713	3.43599	0.000590396	0.00488811
PVP01_1227800		conserved Plasmodium protein, unknown function	538.162	1.55934	0.454159	3.43346	0.000595928	0.00491829
PVP01_1029200		conserved Plasmodium protein, unknown function	177.959	1.53311	0.446515	3.43351	0.00059583	0.00491829
PVP01_1324600		small nucleolar RNA snoR27	41.0599	-2.13956	0.623776	-3.43001	0.000603569	0.00497348
PVP01_0722100	LplA2	lipoate-protein ligase 2, putative	26.9519	2.19503	0.641105	3.42382	0.000617485	0.00507086
PVP01_0523600		Plasmodium exported protein (PHIST), unknown function, pseudogene	10.7337	7.2249	2.11041	3.42346	0.000618302	0.00507086
PVP01_1303900		conserved Plasmodium protein, unknown function	8.32921	3.80445	1.11116	3.42385	0.000617417	0.00507086
PVP01_1139500	CLS	cardiolipin synthetase, putative	28.8463	2.96108	0.865505	3.42122	0.000623418	0.00510478
PVP01_1429700	DBP1	ATP-dependent RNA helicase DBP1, putative	310.463	-1.71714	0.50206	-3.42018	0.000625791	0.00511618
PVP01_0205800		fatty acid elongation protein, GNS1/SUR4 family, putative	56.0231	2.18385	0.638988	3.41768	0.000631578	0.00514736
PVP01_0402200		PIR protein	4.77985	-5.45076	1.59485	-3.41773	0.000631467	0.00514736
PVP01_1437600	PSOP17	secreted ookinete protein, putative	9.76762	7.16848	2.09813	3.41661	0.000634054	0.00515948
PVP01_0004350		PIR protein	9.5669	7.13933	2.09052	3.41509	0.000637604	0.00518029
PVP01_0415600		3'exoribonuclease, putative	35.5652	-1.98768	0.582349	-3.41321	0.000642029	0.00520812
PVP01_0514400	LSM3	U6 snRNA-associated Sm-like protein LSm3, putative	31.4389	-3.46561	1.01668	-3.40874	0.000652642	0.00526963
PVP01_0622000	XPB	TFIIH basal transcription factor complex helicase XPB subunit, putative	37.2779	-2.20818	0.647735	-3.40908	0.000651833	0.00526963
PVP01_1459100		conserved Plasmodium protein, unknown function	65.1132	1.68428	0.494074	3.40896	0.000652101	0.00526963
PVP01_0831000	ARK2	serine/threonine protein kinase, putative	148.706	1.95808	0.574798	3.40655	0.000657892	0.00530381
PVP01_1020700		conserved Plasmodium protein, unknown function	159.444	-1.45368	0.426901	-3.4052	0.000661166	0.0053159
PVP01_1205400		cytidine and deoxycytidylate deaminase, putative	24.649	-2.80098	0.822586	-3.40509	0.00066143	0.0053159
PVP01_1111400	GCbeta	guanylyl cyclase beta, putative	73.2716	4.89687	1.43916	3.40258	0.00066752	0.00535659
PVP01_0835100		conserved Plasmodium protein, unknown function	340.274	1.68764	0.496635	3.39816	0.000678413	0.00543564
PVP01_0614100		conserved Plasmodium protein, unknown function	27.2311	3.21508	0.947083	3.39471	0.000687007	0.00549606
PVP01_1264700	tRIP	tRNA import protein tRIP, putative	81.3077	-3.84181	1.13197	-3.39391	0.000689016	0.00550369
PVP01_0818900		conserved Plasmodium protein, unknown function	35.4713	3.23659	0.953852	3.39317	0.000690878	0.00551012
PVP01_0203900		P-loop containing nucleoside triphosphate hydrolase, putative	128.744	3.15054	0.928612	3.39275	0.000691959	0.00551032
PVP01_1214100	RAB11b	ras-related protein Rab-11B, putative	12.7115	5.67534	1.67467	3.38894	0.000701635	0.00557885
PVP01_1223500	POLQ	DNA polymerase theta, putative	20.6172	2.61444	0.772157	3.38589	0.000709473	0.00563259
PVP01_1148700		PIR protein	6.30518	6.55374	1.93602	3.38516	0.000711376	0.00563911
PVP01_0618000		RNA polymerase II-associated protein 1, putative	111.788	-1.83997	0.543763	-3.38378	0.000714958	0.00565891
PVP01_1011100	BUD31	pre-mRNA-splicing factor BUD31, putative	18.0568	-3.99482	1.18108	-3.38236	0.000718671	0.00567117
PVP01_0318900		conserved Plasmodium protein, unknown function	56.985	6.23715	1.84403	3.38235	0.000718681	0.00567117
PVP01_1145200		phenylalanine--tRNA ligase, putative	6.23665	-5.75901	1.70393	-3.37984	0.000725287	0.00571465
PVP01_0612500	RPB7	DNA-directed RNA polymerase II subunit RPB7, putative	33.9557	-4.23548	1.25339	-3.37923	0.000726904	0.00571875
PVP01_0525000		Plasmodium exported protein (PHIST), unknown function	11.9975	5.78318	1.71193	3.37816	0.000729739	0.00573241
PVP01_0113100	RAB18	ras-related protein Rab-18, putative	33.4961	-2.68436	0.795604	-3.37399	0.000740859	0.00581101
PVP01_0005820		PIR protein	7.29767	-4.40834	1.30684	-3.37328	0.000742778	0.00581731
PVP01_1007300		conserved Plasmodium protein, unknown function	53.092	-2.08446	0.618668	-3.36928	0.000753653	0.00589364
PVP01_1109600		calpain, putative	331.383	-1.21893	0.362097	-3.36631	0.000761799	0.00594842
PVP01_0213500		cation transporting ATPase, putative	80.6639	-2.08161	0.618804	-3.36393	0.000768401	0.00598688
PVP01_1347800		PIR protein	4.94951	-5.4565	1.62217	-3.36371	0.00076902	0.00598688
PVP01_1321500	RRP41	exosome complex exonuclease RRP41, putative	21.0691	-2.31149	0.687567	-3.36184	0.000774239	0.00601852
PVP01_0908900		conserved Plasmodium protein, unknown function	52.3916	2.81112	0.83772	3.35568	0.000791715	0.00614521
PVP01_0942000		conserved Plasmodium protein, unknown function	36.8735	4.00216	1.19284	3.35514	0.000793239	0.00614789
PVP01_1339000	CDS	cytidine diphosphate-diacylglycerol synthase, putative	95.9742	-1.55931	0.465002	-3.35334	0.000798421	0.0061729
PVP01_1305300	EIF3C	eukaryotic translation initiation factor 3 subunit C, putative	232.943	-2.12829	0.634861	-3.35238	0.000801199	0.0061729
PVP01_1006700	UBC13	ubiquitin-conjugating enzyme E2 N, putative	13.8894	-4.3449	1.29591	-3.35277	0.000800071	0.0061729
PVP01_0904300		CPW-WPC family protein	25.7705	4.85612	1.44839	3.35276	0.00080009	0.0061729
PVP01_1343400	MutS	DNA mismatch repair protein, putative	49.5782	-1.90945	0.571214	-3.34278	0.000829425	0.00638095
PVP01_1448200		TBC domain-containing protein, putative	145.039	1.44607	0.432858	3.34076	0.000835508	0.00641828
PVP01_1440200		conserved Plasmodium protein, unknown function	74.6901	2.09264	0.627023	3.33742	0.000845603	0.00648627
PVP01_1017900		RAP protein, putative	28.2099	-3.50189	1.04978	-3.33584	0.000850428	0.00651371
PVP01_1446300	LRR13	leucine-rich repeat protein	43.1196	2.08752	0.626313	3.33303	0.000859042	0.00657003
PVP01_0525700	MCM9	DNA helicase MCM9, putative	25.4036	-2.47492	0.743732	-3.32771	0.000875644	0.00666068
PVP01_1265700		serine/threonine protein kinase, putative	74.5022	3.27775	0.985078	3.3274	0.000876608	0.00666068
PVP01_0104000		conserved Plasmodium protein, unknown function	111.723	2.58515	0.776984	3.32716	0.000877346	0.00666068
PVP01_1462300		conserved Plasmodium protein, unknown function	24.0584	-2.49742	0.750381	-3.3282	0.000874093	0.00666068
PVP01_0908300		prefoldin, putative	31.8424	-3.26848	0.982467	-3.32681	0.000878473	0.00666068
PVP01_1111200		falcilysin, putative	402.942	-3.28434	0.987243	-3.32678	0.000878556	0.00666068
PVP01_0925600	RPL35	60S ribosomal protein L35, putative	126.838	-1.60537	0.482892	-3.32449	0.000885797	0.00670583
PVP01_0313600		conserved Plasmodium protein, unknown function	6.26859	4.07398	1.227	3.32027	0.000899297	0.00679816
PVP01_0945900		serine/threonine protein kinase, putative	143.075	3.9082	1.17817	3.31718	0.00090931	0.00686391
PVP01_0418500	ADSL	adenylosuccinate lyase	49.4487	-2.00278	0.604562	-3.31277	0.000923761	0.0069229
PVP01_0720500		dynein intermediate chain, putative	172.487	3.79902	1.14651	3.31355	0.000921191	0.0069229
PVP01_1209200		inner membrane complex protein, putative	10.3758	3.79887	1.14666	3.31299	0.000923057	0.0069229
PVP01_0808800		Plasmodium exported protein (PHIST), unknown function	49.1443	3.10125	0.935945	3.3135	0.000921364	0.0069229
PVP01_0726600		conserved Plasmodium protein, unknown function	24.1362	2.37	0.715288	3.31335	0.00092186	0.0069229
PVP01_1238100	eIF4A	eukaryotic initiation factor 4a, putative	507.193	-2.712	0.819119	-3.31087	0.00093007	0.00694705
PVP01_0839400		PIR protein	6.78228	5.67431	1.71399	3.31059	0.00093098	0.00694705
PVP01_1414200		peptidyl-prolyl cis-trans isomerase, putative	6.28949	-3.79972	1.14773	-3.31065	0.000930794	0.00694705
PVP01_0406200		ribonuclease P	2359.27	2.47745	0.748846	3.30836	0.000938457	0.00699284
PVP01_0924800		conserved Plasmodium protein, unknown function	77.6645	3.16606	0.95834	3.3037	0.000954192	0.00708984
PVP01_1329000		YTH domain-containing protein, putative	54.0127	-2.36154	0.714751	-3.30401	0.00095314	0.00708984
PVP01_0929300		conserved protein, unknown function	31.2742	-3.36121	1.01758	-3.30315	0.00095604	0.00709346
PVP01_0314900		serine/threonine-protein kinase NEK4, putative	102.379	5.02692	1.52205	3.30273	0.000957473	0.007094
PVP01_0903400		hypothetical protein	3.91283	5.76247	1.74609	3.30022	0.000966094	0.00714773
PVP01_0904200	SufD	FeS cluster assembly protein SufD, putative	20.6458	-2.67037	0.809428	-3.29908	0.000970021	0.00716661
PVP01_0725900		conserved Plasmodium protein, unknown function	22.7481	3.31564	1.00533	3.29808	0.00097348	0.007182
PVP01_1459800		40S ribosomal protein S17, putative	200.643	-2.25734	0.685147	-3.29468	0.000985347	0.00725928
PVP01_0006750		PIR protein	5.96899	6.34589	1.92784	3.29171	0.00099582	0.00732609
PVP01_1209300	UBC	ubiquitin-conjugating enzyme E2, putative	9.67384	-3.79431	1.15331	-3.28992	0.00100216	0.0073607
PVP01_1117800		proteasome subunit alpha type-7, putative	60.0772	-2.36589	0.719206	-3.28959	0.00100335	0.0073607
PVP01_0423000		Plasmodium exported protein, unknown function	389.072	1.66227	0.505415	3.28891	0.00100576	0.00736807
PVP01_1323100	PRMT1	protein arginine N-methyltransferase 1, putative	88.9308	-2.63929	0.802724	-3.28791	0.00100933	0.00738379
PVP01_0604900		conserved Plasmodium protein, unknown function	58.8697	1.8989	0.577763	3.28665	0.00101388	0.00740672
PVP01_1453200		conserved Plasmodium protein, unknown function	40.2885	2.78623	0.848332	3.28436	0.00102215	0.00745668
PVP01_1262200		fructose 1,6-bisphosphate aldolase, putative	658.918	-1.77855	0.541724	-3.28313	0.00102662	0.00747885
PVP01_0820600	EF-1delta	elongation factor 1-delta, putative	48.0574	-2.68879	0.81924	-3.28205	0.00103055	0.00749696
PVP01_1230000		conserved Plasmodium protein, unknown function	26.0407	2.23645	0.682462	3.27703	0.00104906	0.00762104
PVP01_0805800	NOT5	CCR4-NOT transcription complex subunit 5, putative	14.3506	4.02668	1.22953	3.27498	0.00105669	0.00765515
PVP01_1314700		mitochondrial acidic protein MAM33, putative	85.9415	-2.84151	0.867615	-3.27508	0.00105634	0.00765515
PVP01_0813000	ATG18	autophagy-related protein 18, putative	37.6486	-2.35292	0.718551	-3.27453	0.00105836	0.0076566
PVP01_1104700		conserved Plasmodium protein, unknown function	43.8876	3.07229	0.939125	3.27144	0.00107002	0.00771955
PVP01_0605300		flagellar outer arm dynein-associated protein, putative	30.7202	2.93305	0.896548	3.2715	0.0010698	0.00771955
PVP01_1140200	CCT6	T-complex protein 1 subunit zeta, putative	255.029	-1.7137	0.524071	-3.26997	0.00107559	0.00774902
PVP01_1306800		41K blood stage antigen precursor 41-3, putative	48.3971	3.74854	1.14693	3.26832	0.00108186	0.00778344
PVP01_1267700		Sad1/UNC domain-containing protein, putative	57.3916	-1.82655	0.559149	-3.26666	0.00108823	0.00781848
PVP01_0604300		conserved Plasmodium protein, unknown function	245.168	5.14619	1.57586	3.26564	0.00109215	0.00783587
PVP01_1246500		60S ribosomal protein L29, putative	66.7719	-2.42778	0.743592	-3.26493	0.0010949	0.00784474
PVP01_0934500		FHA domain-containing protein, putative	43.9064	-2.12724	0.651628	-3.2645	0.00109658	0.00784602
PVP01_1115500		phosphatase 2A regulatory subunit-related protein, putative	10.6952	3.05473	0.936163	3.26304	0.00110225	0.00787583
PVP01_0119400		Plasmodium exported protein, unknown function	196.24	-1.40993	0.432586	-3.2593	0.00111687	0.00796934
PVP01_1113300		zinc finger protein, putative	184.828	5.13286	1.57605	3.25679	0.0011268	0.00802919
PVP01_1009500	RBG1	ribosome-interacting GTPase 1, putative	30.5951	-2.78077	0.854264	-3.25517	0.00113326	0.00806424
PVP01_0944100		translation initiation factor eIF-1A, putative	53.5937	-1.89069	0.581004	-3.25418	0.0011372	0.00808127
PVP01_1231700		conserved Plasmodium protein, unknown function	69.4836	4.75795	1.46402	3.24993	0.00115434	0.00819188
PVP01_0949400		PIR protein	55.5045	-3.74694	1.15335	-3.24876	0.00115911	0.00821454
PVP01_1027500		conserved Plasmodium protein, unknown function	172.874	2.29429	0.706317	3.24824	0.0011612	0.00821819
PVP01_0307500		conserved Plasmodium protein, unknown function	111.634	2.67027	0.822645	3.24596	0.00117057	0.00827331
PVP01_0912400		endonuclease/exonuclease/phosphatase family protein, putative	101.184	5.48038	1.68986	3.24309	0.0011824	0.00833435
PVP01_0406400		conserved Plasmodium protein, unknown function	145.112	1.49318	0.460378	3.24337	0.00118123	0.00833435
PVP01_0927400	ATG23	autophagy-related protein 23, putative	35.0653	1.85797	0.572993	3.24258	0.00118453	0.00833703
PVP01_0720100		tetratricopeptide repeat protein, putative	85.0767	-2.08807	0.644022	-3.24223	0.00118598	0.00833703
PVP01_0114100		glycosyltransferase family 28 protein, putative	19.5554	3.1357	0.967439	3.24124	0.00119011	0.00835478
PVP01_0414700		conserved Plasmodium protein, unknown function	299.304	2.18285	0.674477	3.23637	0.00121062	0.00848737
PVP01_0925500		conserved Plasmodium protein, unknown function	131.959	1.3471	0.417053	3.23004	0.00123772	0.00866569
PVP01_1346500	RPN6	26S proteasome regulatory subunit RPN6, putative	53.9724	-2.53803	0.786119	-3.22856	0.00124416	0.00869915
PVP01_1458300		conserved Plasmodium protein, unknown function	323.905	1.68143	0.521249	3.22578	0.0012563	0.00877226
PVP01_0410900	CCT8	T-complex protein 1 subunit theta, putative	153.662	-1.88256	0.583827	-3.22451	0.00126187	0.00879935
PVP01_1203900	AP2-O4	AP2 domain transcription factor AP2-O4, putative	7.5931	4.89917	1.52062	3.22182	0.00127377	0.00885868
PVP01_1465800		conserved Plasmodium protein, unknown function	533.784	2.7365	0.849299	3.22207	0.00127267	0.00885868
PVP01_0209600		RAP protein, putative	39.4207	-3.35196	1.04128	-3.21909	0.001286	0.00893181
PVP01_1224700		conserved Plasmodium protein, unknown function	119.722	3.36355	1.04532	3.21772	0.00129214	0.00896252
PVP01_1217500	DXS	1-deoxy-D-xylulose 5-phosphate synthase, putative	83.0359	-2.53585	0.789054	-3.21379	0.00130996	0.00907405
PVP01_1444300	HAD3	haloacid dehalogenase-like hydrolase, putative	292.792	-1.9736	0.614398	-3.21225	0.00131702	0.00911082
PVP01_1112900		conserved Plasmodium protein, unknown function	176.501	-1.63149	0.508046	-3.2113	0.00132136	0.00912876
PVP01_0943800	AP2-O	AP2 domain transcription factor AP2-O, putative	120.743	2.93781	0.915117	3.21031	0.00132593	0.0091482
PVP01_1129000		cleavage stimulation factor subunit 1, putative	46.1089	-2.08715	0.650748	-3.20732	0.0013398	0.00923169
PVP01_0411100		conserved Plasmodium protein, unknown function	51.8227	2.70237	0.842962	3.2058	0.00134685	0.00926805
PVP01_1101400	TRAG19	tryptophan-rich protein	305.037	2.15154	0.672123	3.20111	0.00136901	0.00939576
PVP01_0533700		Plasmodium exported protein (PHIST), unknown function	401.263	7.71901	2.41125	3.20125	0.00136834	0.00939576
PVP01_0824800		conserved Plasmodium protein, unknown function	140.952	2.09125	0.653379	3.20067	0.00137108	0.00939756
PVP01_1233300		conserved Plasmodium protein, unknown function	17.6362	-3.36292	1.0515	-3.19821	0.00138284	0.00946577
PVP01_1007500		WD repeat-containing protein, putative	25.308	-3.38449	1.0588	-3.19654	0.00139087	0.00950825
PVP01_1464600		serine/threonine protein kinase, putative	78.6367	2.20702	0.690805	3.19485	0.00139905	0.00955162
PVP01_0930900		small nucleolar RNA snoR13	49.2209	-3.44278	1.07787	-3.19407	0.00140284	0.00956502
PVP01_1227300		conserved Plasmodium protein, unknown function	58.627	4.29299	1.34442	3.1932	0.00140705	0.00958115
PVP01_0829600	EIF3K	eukaryotic translation initiation factor 3 subunit K, putative	34.1825	-2.60606	0.81676	-3.19073	0.00141914	0.00963103
PVP01_1303300		conserved Plasmodium protein, unknown function	22.0422	3.25989	1.02173	3.19057	0.00141991	0.00963103
PVP01_0515000		conserved Plasmodium protein, unknown function	17.5043	-3.44659	1.08008	-3.19103	0.00141764	0.00963103
PVP01_1228800		conserved Plasmodium protein, unknown function	39.032	2.44168	0.765574	3.18934	0.00142597	0.00965954
PVP01_0908600	ApiAP2	AP2 domain transcription factor, putative	444.71	1.33596	0.419134	3.18742	0.0014355	0.0097115
PVP01_0903800		conserved Plasmodium protein, unknown function	140.826	5.88324	1.84674	3.18574	0.00144387	0.0097463
PVP01_1461100		glucose inhibited division protein a homologue, putative	28.38	-3.38248	1.06179	-3.18563	0.00144438	0.0097463
PVP01_1114700		glutamate--tRNA ligase, putative	27.9341	-3.48063	1.09288	-3.18482	0.00144842	0.00976092
PVP01_0320600		kinesin-19, putative	84.6508	4.62299	1.452	3.18387	0.00145319	0.00978041
PVP01_MIT00500		unspecified product	291.97	2.39817	0.753575	3.18239	0.00146066	0.00981807
PVP01_1302500	SRP14	signal recognition particle subunit SRP14, putative	27.1698	-3.49769	1.09928	-3.1818	0.00146362	0.00982525
PVP01_0608600		HORMA domain protein, putative	60.6254	2.76896	0.870557	3.18068	0.00146932	0.00985086
PVP01_0919200	MYST	histone acetyltransferase, putative	23.281	-3.22952	1.01577	-3.17939	0.00147587	0.00988209
PVP01_1452200		bromodomain protein, putative	310.567	1.73402	0.545472	3.17894	0.00147816	0.0098847
PVP01_0506600	SET3	SET domain protein, putative	233.024	1.83699	0.578048	3.17793	0.00148333	0.00990656
PVP01_0320900		mago nashi protein homologue, putative	18.3477	-3.4163	1.07545	-3.17663	0.00148996	0.00993812
PVP01_1108200	GEX1	nuclear fusion protein, putative	26.6604	2.76628	0.871107	3.1756	0.00149528	0.00996093
PVP01_1114600		dynein light chain, putative	11.4884	2.73494	0.861915	3.1731	0.00150822	0.0100343
PVP01_1203200	GK	glycerol kinase, putative	58.0032	5.75939	1.81734	3.16913	0.00152898	0.0101465
PVP01_0616100	P25	ookinete surface protein P25	331.676	4.72596	1.49123	3.16916	0.00152878	0.0101465
PVP01_0508600		conserved Plasmodium protein, unknown function	38.2048	4.33355	1.36773	3.16841	0.00153273	0.0101585
PVP01_1421500		conserved Plasmodium protein, unknown function	9.37111	3.43938	1.08681	3.16466	0.00155264	0.0102774
PVP01_1421800		conserved Plasmodium protein, unknown function	25.3728	3.7976	1.20051	3.16331	0.00155984	0.010312
PVP01_0714400	MFS2	major facilitator superfamily domain-containing protein, putative	39.3435	3.3864	1.07145	3.16056	0.00157465	0.0103967
PVP01_1433100		geranylgeranyl transferase type-2 subunit beta, putative	80.6904	-1.95854	0.620444	-3.15668	0.00159574	0.0105226
PVP01_0206500		conserved Plasmodium protein, unknown function	131.564	2.01595	0.63871	3.15629	0.00159792	0.0105237
PVP01_0311000		conserved Plasmodium protein, unknown function	35.3256	3.58388	1.1357	3.15566	0.00160138	0.0105331
PVP01_0805900	ALBA3	DNA/RNA-binding protein Alba 3, putative	64.3839	-1.59402	0.505221	-3.1551	0.00160442	0.0105398
PVP01_0611100		conserved Plasmodium protein, unknown function	51.0279	3.65001	1.15713	3.15437	0.00160847	0.0105532
PVP01_0810400	SDH4	succinate dehydrogenase subunit 4, putative	43.2115	1.95869	0.621449	3.15182	0.00162259	0.0106324
PVP01_1115800		conserved Plasmodium protein, unknown function	33.6718	-2.04414	0.648648	-3.15138	0.00162503	0.0106351
PVP01_1245000		conserved Plasmodium protein, unknown function	73.3184	3.56563	1.13171	3.15066	0.00162902	0.0106478
PVP01_0511400		conserved Plasmodium protein, unknown function	15.5741	2.80735	0.891208	3.15005	0.00163245	0.0106569
PVP01_0825500		conserved Plasmodium protein, unknown function	25.5906	2.24792	0.713786	3.14929	0.00163668	0.0106711
PVP01_0818300	CARL	cyclic amine resistance locus protein, putative	52.719	-2.01845	0.6413	-3.14743	0.00164715	0.010726
PVP01_0522100	GAK	GTP:AMP phosphotransferase, putative	18.0321	-3.6132	1.14854	-3.14591	0.00165569	0.0107682
PVP01_0922300	GCN20	protein GCN20, putative	46.7915	-2.21263	0.703522	-3.14508	0.00166044	0.0107856
PVP01_0302100		Plasmodium exported protein (PHIST), unknown function	11.98	2.78182	0.884728	3.14427	0.00166504	0.0108021
PVP01_0906500	RTCB	tRNA-splicing ligase RtcB, putative	53.95	-3.48066	1.10802	-3.14132	0.00168187	0.0108977
PVP01_0702200	CCp4	LCCL domain-containing protein	56.5715	3.05092	0.971873	3.13921	0.00169403	0.0109493
PVP01_1031300	MSP3.8	merozoite surface protein 3	7.31497	-5.948	1.89474	-3.13921	0.00169402	0.0109493
PVP01_1129800		conserved Plasmodium protein, unknown function	44.9275	1.74836	0.557322	3.13708	0.00170641	0.0110157
PVP01_1337200		methyltransferase, putative	22.5531	-2.05751	0.656183	-3.13558	0.00171518	0.0110585
PVP01_0841000		PIR protein	7.30466	-3.63447	1.16043	-3.13199	0.00173625	0.0111806
PVP01_0507500		conserved Plasmodium protein, unknown function	16.2393	2.55327	0.815441	3.13115	0.00174122	0.0111939
PVP01_0708600		exportin-7, putative	147.498	-2.23956	0.715303	-3.13092	0.0017426	0.0111939
PVP01_0206100	PHIL1	photosensitized INA-labeled protein PHIL1, putative	36.1375	3.4443	1.10073	3.12911	0.00175337	0.0112215
PVP01_1444000		ubiquitin-activating enzyme E1, putative	185.18	-1.68647	0.538924	-3.12933	0.00175204	0.0112215
PVP01_0931100		small nucleolar RNA snoR13	26.7214	-3.70046	1.18249	-3.12939	0.00175168	0.0112215
PVP01_0104400		tRNA m5C-methyltransferase, putative	37.6326	-2.21307	0.70767	-3.12725	0.00176447	0.0112788
PVP01_1252100		conserved Plasmodium protein, unknown function	9.02136	4.31281	1.37956	3.12623	0.00177062	0.0113042
PVP01_0916500	DHHC9	palmitoyltransferase DHHC9, putative	4.85788	5.0028	1.60284	3.12122	0.00180106	0.0114845
PVP01_1030000	ATPase3	cation transporting P-ATPase, putative	117.48	-2.40319	0.770341	-3.11965	0.00181066	0.0115316
PVP01_1228600		conserved Plasmodium protein, unknown function	36.0415	4.53643	1.45635	3.11492	0.00183994	0.0117038
PVP01_1271600		Plasmodium exported protein, unknown function	365.013	2.08137	0.668736	3.1124	0.00185573	0.0117899
PVP01_1328800		conserved Plasmodium protein, unknown function	36.8978	5.59037	1.79788	3.10942	0.00187456	0.011895
PVP01_1437000		conserved Plasmodium protein, unknown function	87.5423	-1.52811	0.491807	-3.10713	0.00188914	0.011973
PVP01_0116900		mitogen-activated protein kinase organizer 1, putative	31.8231	-1.98846	0.640461	-3.10473	0.00190451	0.0120411
PVP01_0718100		pyridoxal 5'-phosphate dependent enzyme class III, putative	10.7898	-4.59464	1.4798	-3.10491	0.00190339	0.0120411
PVP01_1217900	NUDC	nuclear movement protein, putative	60.8637	-1.8562	0.598053	-3.10374	0.00191091	0.012067
PVP01_1311300	PPP1	peripheral plastid protein 1, putative	55.4807	-1.97516	0.636934	-3.10104	0.0019284	0.0121627
PVP01_0118300		lysine-specific histone demethylase, putative	254.677	1.5467	0.498972	3.09978	0.00193666	0.0122
PVP01_0607000	SEA1	schizont egress antigen-1, putative	67.4672	3.00767	0.971162	3.09698	0.00195504	0.012301
PVP01_1411800		conserved Plasmodium protein, unknown function	50.8164	-2.59771	0.839066	-3.09595	0.00196184	0.0123289
PVP01_0217200		Plasmodium exported protein, unknown function	82.2661	-2.13795	0.691306	-3.09262	0.00198398	0.0124425
PVP01_1018100		BolA-like protein, putative	12.7842	-3.63884	1.17674	-3.0923	0.0019861	0.0124425
PVP01_1032200		DnaJ protein, putative	3.7757	-5.12182	1.65639	-3.09216	0.00198707	0.0124425
PVP01_0913500		conserved Plasmodium protein, unknown function	92.7139	2.75684	0.892021	3.09056	0.0019978	0.0124796
PVP01_0916800	PDX2	pyridoxine biosynthesis protein PDX2, putative	37.9873	-4.62512	1.49769	-3.08818	0.00201389	0.0125652
PVP01_1122700		pyruvate kinase, putative	627.064	-3.2633	1.05735	-3.08629	0.00202669	0.0126299
PVP01_1463300		conserved Plasmodium protein, unknown function	65.5859	4.38828	1.42219	3.08558	0.00203155	0.012645
PVP01_0716300	HSP70-2	heat shock protein 70, putative	562.74	-2.05368	0.665813	-3.08447	0.00203916	0.0126773
PVP01_API02200	RPS5	apicoplast ribosomal protein S5, putative	3.04345	5.44359	1.7663	3.08192	0.00205672	0.0127608
PVP01_1451300		conserved Plasmodium protein, unknown function	28.4468	-1.98152	0.642975	-3.08181	0.00205748	0.0127608
PVP01_1408800		conserved Plasmodium protein, unknown function	13.2212	-3.23143	1.05028	-3.07672	0.00209289	0.012965
PVP01_0408600	VPS45	vacuolar protein sorting-associated protein 45, putative	47.4832	-1.75647	0.571113	-3.07552	0.00210133	0.0130018
PVP01_1026300	NPL4	nuclear protein localization protein 4, putative	93.6503	-1.89435	0.616296	-3.07377	0.00211372	0.013063
PVP01_1224800	ACBP1	apicoplast calcium binding protein 1, putative	30.6662	3.08554	1.00424	3.07252	0.00212258	0.0131022
PVP01_1406400	MKP1	mitogen-activated protein kinase phosphatase 1, putative	24.7972	-4.04748	1.31811	-3.07067	0.0021358	0.0131682
PVP01_0319200		dynactin subunit 5, putative	9.8464	3.5917	1.17188	3.06491	0.00217734	0.0134085
PVP01_0936800		3-oxo-5-alpha-steroid 4-dehydrogenase, putative	19.6874	-3.11499	1.01831	-3.05897	0.00222096	0.013661
PVP01_0311700	PPCS	phosphopantothenate--cysteine ligase, putative	27.8389	-2.99173	0.978394	-3.0578	0.00222971	0.0136986
PVP01_1132700		conserved Plasmodium protein, unknown function	77.0314	-1.46032	0.478037	-3.05484	0.00225183	0.0138183
PVP01_1416600	GCD14	tRNA (adenine(58)-N(1))-methyltransferase catalytic subunit TRM61, putative	17.1545	-2.71654	0.889922	-3.05257	0.00226894	0.0138743
PVP01_0902300		hypothetical protein	27.6021	5.76197	1.88754	3.05263	0.00226844	0.0138743
PVP01_API05500		small subunit ribosomal RNA	1126.21	2.38373	0.780869	3.05266	0.00226819	0.0138743
PVP01_1440000		FbpA domain protein, putative	43.7195	-1.9257	0.631574	-3.04905	0.00229569	0.0140215
PVP01_1308600		3',5'-cyclic nucleotide phosphodiesterase, putative	23.0574	3.19005	1.04659	3.04804	0.00230338	0.014052
PVP01_1123500		conserved Plasmodium protein, unknown function	302.276	-2.20723	0.725817	-3.04103	0.00235768	0.0143664
PVP01_1471800		Plasmodium exported protein, unknown function	22.5275	2.89925	0.953514	3.04059	0.00236112	0.0143706
PVP01_0934900	PDI-11	protein disulfide isomerase, putative	29.3104	-2.13309	0.701885	-3.03908	0.00237301	0.0143926
PVP01_0807500		conserved Plasmodium protein, unknown function	19.0437	3.88311	1.27766	3.03924	0.00237174	0.0143926
PVP01_1271400		Plasmodium exported protein, unknown function	260.409	-1.56684	0.515483	-3.03955	0.00236933	0.0143926
PVP01_1004900		conserved Plasmodium protein, unknown function	16.5311	3.60018	1.18515	3.03773	0.00238364	0.0144403
PVP01_1311700	TRAPPC5	trafficking protein particle complex subunit 5, putative	5.12828	-3.88589	1.27936	-3.03737	0.00238649	0.0144407
PVP01_1134400		conserved Plasmodium protein, unknown function	26.2223	3.52936	1.16252	3.03595	0.00239779	0.0144923
PVP01_0319600		RNA-binding protein, putative	133.402	-1.43695	0.473435	-3.03516	0.00240405	0.0145133
PVP01_1305100	SHLP2	shewanella-like protein phosphatase 2, putative	24.7994	-2.78128	0.916511	-3.03464	0.00240825	0.0145219
PVP01_1334800		conserved Plasmodium protein, unknown function	14.7367	-3.29041	1.08491	-3.03289	0.00242221	0.0145892
PVP01_0907000		conserved Plasmodium protein, unknown function	104.931	-1.96203	0.647228	-3.03143	0.00243399	0.0146432
PVP01_1421700		RNA-binding protein, putative	17.4328	-3.8557	1.2724	-3.03024	0.00244357	0.0146839
PVP01_1230900	GAPM1	glideosome associated protein with multiple membrane spans 1, putative	113.464	4.00476	1.32261	3.02791	0.00246248	0.0147805
PVP01_1417200		conserved Plasmodium protein, unknown function	33.8661	4.29012	1.41771	3.02609	0.00247741	0.0148531
PVP01_1310200		kinesin-7, putative	104.216	4.45301	1.47375	3.02154	0.00251492	0.0150606
PVP01_1472100		PIR protein	4.69082	-5.33517	1.76705	-3.01925	0.002534	0.0151575
PVP01_0606700	ROK1	ATP-dependent RNA helicase ROK1, putative	85.464	1.96721	0.652298	3.01581	0.00256293	0.015278
PVP01_0109600		Cg2 protein, putative	79.2372	-1.77895	0.589867	-3.01585	0.00256257	0.015278
PVP01_1272200		PIR protein	3.19563	-4.85701	1.61038	-3.01607	0.00256078	0.015278
PVP01_0420200	COQ5	2-methoxy-6-polyprenyl-1,4-benzoquinol methylase, mitochondrial, putative	41.4361	2.4913	0.826216	3.01531	0.00256713	0.0152855
PVP01_0819800	Cap380	oocyst capsule protein Cap380, putative	49.8475	5.73382	1.90387	3.01166	0.00259827	0.0154533
PVP01_0810500		conserved Plasmodium protein, unknown function	35.5573	2.71555	0.902037	3.01046	0.00260849	0.0154964
PVP01_1222100	APN1	apurinic/apyrimidinic endonuclease Apn1, putative	27.9842	-2.64905	0.880346	-3.0091	0.00262024	0.0155485
PVP01_1205500	TKL3	tyrosine kinase-like protein, putative	88.0559	3.22275	1.07123	3.00846	0.00262572	0.0155634
PVP01_0515500	IMP4	U3 small nucleolar ribonucleoprotein protein IMP4, putative	31.549	-2.45688	0.817215	-3.00641	0.00264356	0.0156344
PVP01_0406500	SNRPD2	small nuclear ribonucleoprotein Sm D2, putative	8.78576	-3.2092	1.06746	-3.00639	0.0026437	0.0156344
PVP01_1204900		conserved Plasmodium protein, unknown function	10.855	3.11232	1.03562	3.00528	0.00265338	0.0156739
PVP01_1434800		serine--tRNA ligase, putative	18.1613	-3.05964	1.01956	-3.00093	0.0026916	0.0158817
PVP01_1116600	SET6	histone-lysine N-methyltransferase, putative	10.3895	-3.30752	1.1032	-2.9981	0.00271664	0.0160113
PVP01_1338300	eIF2gamma	eukaryotic translation initiation factor 2 subunit gamma, putative	62.5326	-3.40436	1.13613	-2.99646	0.00273133	0.0160435
PVP01_1328500	GlyRS	glycine--tRNA ligase, putative	122.786	-2.4806	0.827684	-2.99704	0.00272612	0.0160435
PVP01_1246100	RPL27	60S ribosomal protein L27, putative	120.906	-2.30002	0.767521	-2.99669	0.00272929	0.0160435
PVP01_0423800		PIR protein	8.4928	-4.62235	1.54331	-2.99508	0.00274371	0.0160981
PVP01_1317300		conserved Plasmodium protein, unknown function	45.2598	1.7446	0.583317	2.99083	0.0027822	0.0163056
PVP01_0731000	M18AAP	M18 aspartyl aminopeptidase, putative	55.6752	-2.82591	0.946069	-2.987	0.00281731	0.0164928
PVP01_1018300		conserved Plasmodium protein, unknown function	231.756	4.94237	1.65489	2.98653	0.00282163	0.0164996
PVP01_0909800		small nucleolar RNA snoR07	3.4629	-4.91289	1.64637	-2.98408	0.00284431	0.0166136
PVP01_1227900		conserved Plasmodium protein, unknown function	87.7938	3.27638	1.09917	2.98078	0.00287511	0.0167559
PVP01_1320000		rRNA (adenosine-2'-O-)-methyltransferase, putative	87.4177	1.4557	0.48832	2.98105	0.00287264	0.0167559
PVP01_1015200	PUF1	mRNA-binding protein PUF1, putative	106.099	3.41255	1.14511	2.9801	0.00288157	0.0167749
PVP01_0618900		aspartyl protease, putative	54.8871	4.60322	1.5449	2.97962	0.00288605	0.0167822
PVP01_1125200		CPW-WPC family protein	29.8429	3.17582	1.0661	2.97892	0.00289264	0.0168018
PVP01_0511300	VPS15	serine/threonine protein kinase VPS15, putative	46.2016	1.49847	0.5031	2.97847	0.00289688	0.0168077
PVP01_0914500	GloI	glyoxalase I, putative	22.9999	-3.57281	1.2	-2.97734	0.00290762	0.0168294
PVP01_0705700		GTPase-activating protein, putative	66.6684	2.17033	0.729019	2.97706	0.0029103	0.0168294
PVP01_0305400		conserved Plasmodium protein, unknown function	175.367	1.93152	0.648775	2.97719	0.00290905	0.0168294
PVP01_0829500	TRAPPC4	trafficking protein particle complex subunit 4, putative	23.2166	-3.0689	1.03122	-2.976	0.00292037	0.016869
PVP01_1209600	ROM6	rhomboid protease ROM6, putative	12.7686	-3.17752	1.06792	-2.97543	0.00292582	0.0168818
PVP01_0514200		RNA-binding protein, putative	8.32241	-3.84271	1.29185	-2.97457	0.00293396	0.01691
PVP01_1009900		karyopherin beta, putative	523.354	-3.57794	1.20405	-2.9716	0.00296256	0.017056
PVP01_0902800		hypothetical protein	3.53485	-5.0141	1.69041	-2.9662	0.00301505	0.017339
PVP01_1009100	UFD1	ubiquitin fusion degradation protein 1, putative	40.1314	-1.85889	0.627739	-2.96125	0.00306394	0.0176008
PVP01_0618500	HAD1	haloacid dehalogenase-like hydrolase, putative	69.4888	-1.95289	0.660519	-2.95659	0.00311061	0.0178492
PVP01_1422900	NELFA	negative elongation factor A, putative	11.2396	2.30936	0.781656	2.95445	0.0031323	0.0179342
PVP01_0210200		conserved protein, unknown function	19.9511	-3.52672	1.1936	-2.9547	0.00312975	0.0179342
PVP01_0302600		conserved Plasmodium protein, unknown function	59.0106	-1.65204	0.559335	-2.95357	0.00314117	0.0179653
PVP01_0941700		conserved Plasmodium protein, unknown function	53.145	4.24179	1.43655	2.95275	0.00314952	0.0179781
PVP01_1410000		conserved Plasmodium protein, unknown function	26.6404	-2.62666	0.889587	-2.95268	0.00315031	0.0179781
PVP01_0106200		importin-7, putative	211.89	-1.75763	0.595464	-2.9517	0.00316029	0.0180154
PVP01_0817600		conserved Plasmodium protein, unknown function	93.3771	2.5043	0.849309	2.94863	0.00319184	0.0181753
PVP01_1226300		proteasome subunit beta type-7, putative	34.6588	-2.24434	0.761768	-2.94622	0.00321684	0.0182977
PVP01_1441000		conserved Plasmodium protein, unknown function	17.3725	5.22415	1.77387	2.94506	0.00322895	0.0183467
PVP01_0600600		PIR protein	5.41701	6.1985	2.10606	2.94317	0.0032487	0.0184388
PVP01_0404700		Plasmodium exported protein, unknown function	20.7234	2.65828	0.903566	2.94199	0.00326108	0.0184889
PVP01_1435700		DNA-binding chaperone, putative	91.1347	-1.62911	0.553925	-2.94103	0.0032712	0.0185262
PVP01_0102700		conserved Plasmodium protein, unknown function	158.897	1.85913	0.632211	2.94068	0.00327494	0.0185272
PVP01_0614500		LEM3/CDC50 family protein, putative	80.6778	-1.58641	0.539596	-2.94	0.00328212	0.0185477
PVP01_0201300		lysophospholipase, putative, pseudogene	3.97933	5.72745	1.95023	2.93681	0.00331604	0.0187191
PVP01_0421000		conserved Plasmodium protein, unknown function	270.037	3.21614	1.09697	2.93184	0.00336965	0.0189809
PVP01_0606400		conserved Plasmodium protein, unknown function	73.4028	2.76525	0.94318	2.93183	0.00336969	0.0189809
PVP01_0931000		small nucleolar RNA snoR13	50.7636	-2.20099	0.751049	-2.93055	0.00338364	0.0190389
PVP01_1426300		60S ribosomal protein L13, putative	206.256	-2.27455	0.777138	-2.92683	0.00342437	0.0192473
PVP01_1016100	AP2-Q	AP2 domain transcription factor AP2-Q, putative	170.936	3.33456	1.14022	2.92449	0.00345021	0.01933
PVP01_1006300	HIP	Hsc70-interacting protein, putative	109.155	-1.76747	0.604351	-2.92458	0.00344924	0.01933
PVP01_0521900		coatomer subunit zeta, putative	16.4307	-2.97864	1.01847	-2.92464	0.00344857	0.01933
PVP01_1120200	PL	phosphatidylcholine-sterol acyltransferase, putative	141.265	1.78303	0.610178	2.92214	0.00347632	0.0194554
PVP01_1238000	U2AF2	splicing factor U2AF large subunit, putative	78.3297	-1.44869	0.495884	-2.92143	0.0034843	0.0194777
PVP01_1243900		conserved Plasmodium protein, unknown function	18.6399	-2.43457	0.833439	-2.92112	0.00348776	0.0194777
PVP01_1026500	SUB1	subtilisin-like protease 1	46.7083	3.08755	1.05746	2.91977	0.00350285	0.019541
PVP01_0530000		conserved Plasmodium protein, unknown function	17.5169	2.8088	0.962283	2.91889	0.0035128	0.0195547
PVP01_0115500		alpha/beta hydrolase, putative	32.0868	-3.23463	1.10815	-2.91894	0.00351226	0.0195547
PVP01_1320900		protein kinase, putative	70.1907	2.11658	0.725259	2.91838	0.00351851	0.0195656
PVP01_1462200		kinesin-13, putative	92.3299	3.43544	1.17887	2.91419	0.00356618	0.0198096
PVP01_0403900		PIR protein	39.8197	-2.15864	0.740948	-2.91335	0.00357571	0.0198414
PVP01_1309200		conserved Plasmodium protein, unknown function	68.792	2.38188	0.818199	2.91112	0.00360131	0.0199622
PVP01_1103800	ABCE1	ABC transporter E family member 1, putative	39.265	-2.03278	0.698462	-2.91037	0.00361001	0.0199892
PVP01_0806000		conserved Plasmodium protein, unknown function	39.5806	3.90687	1.3432	2.90862	0.00363028	0.0200801
PVP01_0514000		conserved Plasmodium protein, unknown function	199.505	1.73865	0.597906	2.9079	0.00363861	0.0201049
PVP01_1021700	MAT1	CDK-activating kinase assembly factor MAT1, putative	21.8478	-1.8988	0.65309	-2.9074	0.00364444	0.0201158
PVP01_1230300		conserved Plasmodium protein, unknown function	207.114	2.08142	0.716575	2.90468	0.0036763	0.0202702
PVP01_1112600	DIS3	exosome complex exonuclease RRP44, putative	43.3027	-1.9048	0.656071	-2.90335	0.0036919	0.0203347
PVP01_0113700	PTP2	protein tyrosine phosphatase, putative	23.7953	3.11479	1.07363	2.90119	0.00371752	0.0204542
PVP01_1431700		iron-sulfur subunit of succinate dehydrogenase, putative	19.2171	2.28549	0.787974	2.90046	0.00372611	0.0204798
PVP01_0832000	CCT7	T-complex protein 1 subunit eta, putative	115.919	-2.06089	0.710718	-2.89973	0.00373487	0.0205064
PVP01_0931300	COG2	conserved oligomeric Golgi complex subunit 2, putative	46.3422	-2.06917	0.713691	-2.89926	0.00374048	0.0205156
PVP01_1465500		conserved Plasmodium protein, unknown function	73.7099	5.05709	1.74643	2.89567	0.00378353	0.0207299
PVP01_1244900		valine--tRNA ligase, putative	94.5918	-3.46833	1.19884	-2.89306	0.00381507	0.0208808
PVP01_1460400		conserved Plasmodium protein, unknown function	5.79471	3.49681	1.20901	2.8923	0.00382436	0.0209097
PVP01_0111000	RPL34	60S ribosomal protein L34, putative	110.505	-2.01985	0.699994	-2.88552	0.0039077	0.0213403
PVP01_1238900		rab GTPase activator, putative	217.084	1.25365	0.434507	2.88523	0.0039113	0.0213403
PVP01_0215600		dynein heavy chain, putative	240.997	3.47847	1.20595	2.88441	0.00392143	0.0213732
PVP01_0010870		helicase, putative	3.28687	-4.82754	1.67408	-2.8837	0.00393031	0.0213992
PVP01_0108500		conserved Plasmodium protein, unknown function	73.5606	2.43512	0.844545	2.88335	0.00393472	0.021401
PVP01_1147600		Plasmodium exported protein, unknown function	678.565	-1.87307	0.649782	-2.88261	0.00394397	0.0214289
PVP01_1402500		conserved Plasmodium protein, unknown function	60.1672	2.5354	0.880794	2.87854	0.00399514	0.0216844
PVP01_0316800		conserved Plasmodium protein, unknown function	72.0542	-2.12879	0.739678	-2.87799	0.00400217	0.0216999
PVP01_1118100	ERD2	ER lumen protein retaining receptor, putative	31.2624	-1.9731	0.686074	-2.87593	0.00402841	0.0217684
PVP01_1466400	PPM4	protein phosphatase PPM4, putative	94.7355	1.37322	0.477484	2.87595	0.00402816	0.0217684
PVP01_1461300	TFB2	RNA polymerase II transcription factor B subunit 2, putative	48.8903	-3.0946	1.07596	-2.87613	0.00402579	0.0217684
PVP01_0924000		translation elongation factor EF-1, subunit alpha, putative	70.5084	-1.42373	0.495091	-2.87569	0.0040315	0.0217684
PVP01_0510800	IMC1i	inner membrane complex protein 1i, putative	54.1544	4.01172	1.39595	2.87382	0.00405543	0.021875
PVP01_0834400		P-loop containing nucleoside triphosphate hydrolase, putative	47.8277	3.00243	1.04533	2.87222	0.00407604	0.0219634
PVP01_1337800		conserved Plasmodium protein, unknown function	17.8259	-2.96443	1.03265	-2.87069	0.00409574	0.0220468
PVP01_0713500	UBC9	SUMO-conjugating enzyme UBC9, putative	31.5905	-1.99046	0.693829	-2.8688	0.0041203	0.0221561
PVP01_1470900		PIR protein, pseudogene	10.5082	4.14532	1.44607	2.86661	0.004149	0.0222875
PVP01_1428200		conserved protein, unknown function	173.47	-2.84884	0.994076	-2.86581	0.00415938	0.0223203
PVP01_1005400	DHHC7	palmitoyltransferase DHHC7, putative	28.8304	3.93612	1.37448	2.86372	0.00418693	0.0224123
PVP01_0921500	HSBP	heat shock factor-binding protein 1, putative	11.429	2.42697	0.847572	2.86344	0.00419068	0.0224123
PVP01_1335700		conserved Plasmodium protein, unknown function	122.729	4.56532	1.59428	2.86356	0.00418909	0.0224123
PVP01_1123100		Sec14 domain containing protein	29.6324	3.58199	1.25118	2.86289	0.00419801	0.0224123
PVP01_0731400		conserved Plasmodium protein, unknown function	29.1828	-2.63613	0.920748	-2.86303	0.00419615	0.0224123
PVP01_0313400		conserved Plasmodium protein, unknown function	97.1499	4.45973	1.5588	2.86101	0.00422292	0.0225222
PVP01_0204400		chromatin assembly factor 1 protein WD40 domain, putative	296.942	1.70639	0.596498	2.86067	0.00422742	0.0225232
PVP01_1426100	ALBA1	DNA/RNA-binding protein Alba 1, putative	329.856	-1.20414	0.42116	-2.85911	0.00424826	0.0226111
PVP01_1148100		PIR protein	2.59183	5.15093	1.80246	2.85773	0.00426685	0.0226869
PVP01_1418300		zinc finger protein, putative	18.3919	-3.01678	1.05584	-2.85724	0.00427338	0.0226985
PVP01_1218900		conserved Plasmodium protein, unknown function	41.5369	-1.98053	0.69325	-2.85688	0.00427826	0.0227013
PVP01_1250100	VP1	V-type H(+)-translocating pyrophosphatase, putative	201.874	-2.45489	0.859544	-2.85603	0.00428969	0.0227254
PVP01_0531500		conserved Plasmodium protein, unknown function	23.343	2.6942	0.943381	2.8559	0.00429151	0.0227254
PVP01_1109400		conserved Plasmodium protein, unknown function	40.912	5.79889	2.03468	2.85002	0.0043716	0.023126
PVP01_0730500		proteasome subunit beta type-6, putative	35.6278	-1.9017	0.667844	-2.84752	0.00440606	0.0232847
PVP01_0408400		MtN3-like protein	81.2735	1.32304	0.464772	2.84664	0.00441838	0.0233262
PVP01_1454600		conserved Plasmodium protein, unknown function	9.98045	3.90843	1.37346	2.84569	0.00443151	0.0233719
PVP01_1317900	MAPK1	mitogen-activated protein kinase 1, putative	48.9278	2.30094	0.808733	2.84511	0.00443959	0.0233908
PVP01_0807600	EIF3D	eukaryotic translation initiation factor 3 subunit D, putative	88.9889	-3.43764	1.20909	-2.84316	0.00446685	0.0235107
PVP01_1311100	ATP4	non-SERCA-type Ca2+ -transporting P-ATPase, putative	381.75	-1.12282	0.395278	-2.84059	0.004503	0.023677
PVP01_0006650		PIR protein, pseudogene	3.48634	-4.96575	1.74989	-2.83774	0.00454336	0.0238652
PVP01_0822300		26S proteasome non-ATPase regulatory subunit 9, putative	27.4773	-1.95477	0.688993	-2.83714	0.00455196	0.0238864
PVP01_0725000		conserved Plasmodium protein, unknown function	173.114	1.38015	0.486819	2.83503	0.00458215	0.0240206
PVP01_0414400		conserved Plasmodium protein, unknown function	36.8019	-2.28316	0.805496	-2.83448	0.0045901	0.0240381
PVP01_1005800	UMP1	proteasome maturation factor UMP1, putative	22.2458	-2.25944	0.797518	-2.83309	0.00461004	0.0241183
PVP01_0515100	PLP5	perforin-like protein 5	12.0631	2.29583	0.811019	2.83079	0.00464327	0.0242678
PVP01_0419900		conserved Plasmodium protein, unknown function	31.4656	4.38603	1.55041	2.82895	0.00467016	0.0243839
PVP01_1245300	MND1	meiotic nuclear division protein 1, putative	18.6421	3.20319	1.13256	2.82827	0.00468004	0.0244111
PVP01_0611500		conserved Plasmodium protein, unknown function	25.1408	2.33753	0.826597	2.82789	0.0046856	0.0244157
PVP01_1235000		conserved Plasmodium protein, unknown function	34.5104	4.82333	1.70707	2.8255	0.00472076	0.0245414
PVP01_1139600		conserved Plasmodium protein, unknown function	71.6111	1.27693	0.451886	2.82578	0.00471653	0.0245414
PVP01_0941500		conserved Plasmodium protein, unknown function	58.0051	-1.54728	0.547716	-2.82497	0.00472854	0.0245414
PVP01_0614300		WD repeat-containing protein, putative	35.5384	-1.71617	0.607485	-2.82504	0.00472752	0.0245414
PVP01_0814000		translation initiation factor eIF-2B subunit delta, putative	35.3468	-3.06468	1.08605	-2.82187	0.0047745	0.0247553
PVP01_1207600	NT1	nucleoside transporter 1	286.911	-2.16357	0.766947	-2.82102	0.00478719	0.0247964
PVP01_1437900		clathrin heavy chain, putative	164.874	-2.16976	0.770864	-2.81472	0.00488203	0.0252626
PVP01_0830800		small nucleolar RNA Me18S-Um1356	4.07638	-3.56018	1.26531	-2.81369	0.00489768	0.0253185
PVP01_0616200		conserved Plasmodium protein, unknown function	8.95275	-3.08484	1.09685	-2.81246	0.00491644	0.0253902
PVP01_1204700	KRS1	lysine--tRNA ligase, putative	71.4427	-1.84224	0.655512	-2.81039	0.00494813	0.0255127
PVP01_1147300		conserved Plasmodium protein, unknown function	135.644	1.60752	0.572014	2.81027	0.00494992	0.0255127
PVP01_0919900	U2AF1	splicing factor U2AF small subunit, putative	41.5957	-1.6722	0.595309	-2.80896	0.00497025	0.0255921
PVP01_1302300	ORC1	origin recognition complex subunit 1, putative	136.505	3.38763	1.2088	2.80247	0.00507131	0.0260868
PVP01_1331400	CBF5	H/ACA ribonucleoprotein complex subunit 4, putative	34.0849	-1.98796	0.709996	-2.79995	0.00511101	0.0262282
PVP01_1110700		conserved Plasmodium protein, unknown function	24.3081	4.58599	1.63797	2.79979	0.00511354	0.0262282
PVP01_1461400		ACEA small nucleolar RNA U3	48.8511	2.79108	0.996896	2.79977	0.00511389	0.0262282
PVP01_1222800		60S ribosomal protein L23, putative	216.264	-2.26803	0.810486	-2.79836	0.00513626	0.026317
PVP01_1447700		conserved Plasmodium protein, unknown function	135.754	1.55211	0.554739	2.79792	0.00514328	0.0263271
PVP01_0911800		tRNA m5C-methyltransferase, putative	34.2383	-1.57544	0.563418	-2.79622	0.00517045	0.0264403
PVP01_1467900		DNA repair protein rhp16, putative	124.597	1.20618	0.431419	2.79584	0.00517648	0.0264452
PVP01_1448700		WD repeat-containing protein, putative	21.2132	-2.93681	1.05063	-2.79528	0.00518554	0.0264655
PVP01_0105900		40S ribosomal protein S29, putative	53.6614	-1.97043	0.705665	-2.7923	0.00523347	0.0266841
PVP01_1219000		conserved Plasmodium protein, unknown function	13.2042	-2.92067	1.04627	-2.7915	0.00524647	0.0267242
PVP01_0907800		U6 snRNA-associated Sm-like protein LSm4, putative	21.6586	-2.36912	0.848942	-2.79068	0.00525977	0.0267658
PVP01_0937200	TSN	tudor staphylococcal nuclease, putative	255.089	-1.4646	0.525074	-2.78932	0.00528181	0.0268518
PVP01_0609600		conserved Plasmodium protein, unknown function	33.5066	3.80548	1.3647	2.78851	0.00529517	0.0268935
PVP01_0812900		conserved Plasmodium protein, unknown function	35.2583	-1.9103	0.685612	-2.78627	0.00533181	0.0270532
PVP01_0211000	PSTK	L-seryl-tRNA(Sec) kinase, putative	41.343	2.13648	0.76695	2.78569	0.00534139	0.0270755
PVP01_1311400		conserved Plasmodium protein, unknown function	18.3076	-3.29457	1.1831	-2.78469	0.00535791	0.0271329
PVP01_1306300		conserved Plasmodium protein, unknown function	19.7859	2.8428	1.0221	2.78133	0.00541359	0.0273617
PVP01_1346000		conserved Plasmodium protein, unknown function	79.105	-1.81717	0.653301	-2.78152	0.00541042	0.0273617
PVP01_1249600		conserved Plasmodium protein, unknown function	262.933	-1.39559	0.5022	-2.77895	0.00545346	0.0275365
PVP01_1447100		conserved Plasmodium protein, unknown function	86.0057	2.02044	0.7273	2.77801	0.00546933	0.02759
PVP01_1211800	PMT	phosphoethanolamine N-methyltransferase	152.659	-2.10778	0.759038	-2.77692	0.00548773	0.027634
PVP01_0809200		small subunit rRNA synthesis-associated protein, putative	18.2363	-3.03081	1.09145	-2.77686	0.00548865	0.027634
PVP01_0716100		GPN-loop GTPase, putative	15.8339	-2.99377	1.0785	-2.77586	0.00550565	0.0276928
PVP01_1146400		geranylgeranyltransferase, putative	40.8143	-1.96135	0.707441	-2.77246	0.00556342	0.0279564
PVP01_0106700		conserved Plasmodium protein, unknown function	729.799	1.52128	0.548978	2.77111	0.0055866	0.0280459
PVP01_1149100		PIR protein	14.4396	4.87105	1.75828	2.77035	0.00559966	0.0280575
PVP01_1455600		conserved Plasmodium protein, unknown function	128.049	-1.31722	0.475422	-2.77064	0.00559457	0.0280575
PVP01_0923700	CDPK7	calcium-dependent protein kinase 7, putative	411.916	1.45073	0.5243	2.76699	0.00565763	0.0283207
PVP01_1016300	EIF3B	eukaryotic translation initiation factor 3 subunit B, putative	234.795	-1.93566	0.700336	-2.7639	0.00571157	0.0285633
PVP01_1457500		conserved Plasmodium protein, unknown function	17.3112	3.58621	1.29768	2.76355	0.00571757	0.0285659
PVP01_1267200		vesicle-associated membrane protein, putative	26.7997	-2.8724	1.03978	-2.7625	0.005736	0.0286306
PVP01_1213500		small nucleolar RNA snoR20	2.38245	-4.46676	1.61712	-2.76216	0.00574195	0.0286329
PVP01_0909400	ERC	endoplasmic reticulum-resident calcium binding protein, putative	184.669	-2.02046	0.732151	-2.75962	0.00578692	0.0287198
PVP01_0106900	MSH2-2	DNA mismatch repair protein MSH2, putative	23.7515	2.73979	0.992774	2.75973	0.0057849	0.0287198
PVP01_1401800	TRAG21	tryptophan-rich protein	133.231	2.94812	1.06829	2.75965	0.00578632	0.0287198
PVP01_0004990		PIR protein	2.77624	5.41138	1.9608	2.75978	0.00578405	0.0287198
PVP01_0818000		conserved Plasmodium protein, unknown function	25.1036	2.60425	0.943511	2.76017	0.00577707	0.0287198
PVP01_1146700		MYND-type zinc finger protein, putative	21.7148	-2.03006	0.735739	-2.75922	0.005794	0.0287277
PVP01_0720800		conserved Plasmodium protein, unknown function	49.6992	3.51082	1.27293	2.75807	0.00581435	0.0287739
PVP01_0724400		conserved Plasmodium protein, unknown function	437.597	1.22354	0.443616	2.7581	0.00581388	0.0287739
PVP01_1245100		conserved Plasmodium protein, unknown function	23.8974	3.09506	1.12247	2.75737	0.00582692	0.0288087
PVP01_1413600	BCKDHA	2-oxoisovalerate dehydrogenase subunit alpha, mitochondrial, putative	12.9049	2.84999	1.03387	2.75664	0.00583993	0.0288457
PVP01_0943400		methyltransferase, putative	34.4145	-2.04975	0.743652	-2.75633	0.00584547	0.0288458
PVP01_1337900		conserved Plasmodium protein, unknown function	46.8611	2.55628	0.927868	2.755	0.00586917	0.0289354
PVP01_0713600		ribonuclease H2 subunit C, putative	77.4694	1.82614	0.663257	2.75329	0.00589989	0.0290593
PVP01_1119000	YTM1	ribosome biogenesis protein YTM1, putative	16.5941	-2.6983	0.980491	-2.75199	0.00592337	0.0291475
PVP01_1024000		conserved Plasmodium protein, unknown function	84.0517	2.23836	0.814124	2.74941	0.00597026	0.0293505
PVP01_0319500		conserved Plasmodium protein, unknown function	112.431	1.88742	0.687506	2.74532	0.00604522	0.029691
PVP01_0908500	PES	pescadillo homolog, putative	52.3884	-1.65579	0.603217	-2.74493	0.00605244	0.0296985
PVP01_1212700	IRP	iron regulatory protein, putative	40.8586	2.05892	0.750625	2.74294	0.00608917	0.0298507
PVP01_0944700	RPS21	40S ribosomal protein S21, putative	144.982	-1.36854	0.499128	-2.74187	0.00610901	0.0299198
PVP01_0410000	RON6	rhoptry neck protein 6, putative	28.1282	3.59665	1.31249	2.74033	0.00613767	0.0300071
PVP01_1002400		conserved Plasmodium protein, unknown function	21.4639	-2.84859	1.03952	-2.7403	0.00613833	0.0300071
PVP01_0416200	RRF1	ribosome-recycling factor, putative	18.573	-2.70931	0.98926	-2.73872	0.00616784	0.0300668
PVP01_0507100		conserved Plasmodium protein, unknown function	78.9077	1.98113	0.723343	2.73886	0.00616531	0.0300668
PVP01_0704400		endonuclease/exonuclease/phosphatase domain containing protein	129.09	1.23001	0.44904	2.7392	0.0061589	0.0300668
PVP01_1230200	PRELID	PRELI domain-containing protein, putative	63.6798	2.25148	0.822583	2.73709	0.0061985	0.030188
PVP01_1032300		conserved Plasmodium protein, unknown function	9.1078	-3.71301	1.35686	-2.73647	0.00621026	0.0302171
PVP01_1420200	TRM1	tRNA (guanine(26)-N(2))-dimethyltransferase, putative	61.2817	-1.97136	0.720575	-2.73581	0.00622274	0.0302496
PVP01_0510100		conserved Plasmodium protein, unknown function	69.344	1.44793	0.529593	2.73405	0.00625605	0.0303832
PVP01_1267300		leucine carboxyl methyltransferase, putative	21.1385	-3.13843	1.14883	-2.73186	0.00629775	0.0305573
PVP01_1313200	PTEX150	translocon component PTEX150, putative	342.224	-1.01494	0.371737	-2.73026	0.00632849	0.0306198
PVP01_1402800		Plasmodium exported protein, unknown function	447.749	-1.81035	0.663098	-2.73013	0.00633087	0.0306198
PVP01_1123300		conserved Plasmodium protein, unknown function	21.4858	-3.09411	1.13307	-2.73073	0.00631945	0.0306198
PVP01_0007220		PIR protein	2.65396	-4.58929	1.68108	-2.72996	0.00633411	0.0306198
PVP01_0716700	EIF3F	eukaryotic translation initiation factor 3 subunit F, putative	60.1396	-2.23199	0.817787	-2.72931	0.00634673	0.0306524
PVP01_1340800	AP2-G2	AP2 domain transcription factor AP2-G2, putative	121.665	1.46617	0.538229	2.72405	0.00644859	0.0311155
PVP01_1429800	PPM7	protein phosphatase PPM7, putative	11.6308	-3.22273	1.1851	-2.71938	0.00654051	0.0315299
PVP01_0839900		PIR protein, pseudogene	3.92105	-5.1104	1.88263	-2.7145	0.00663754	0.0319681
PVP01_1424300		conserved Plasmodium protein, unknown function	104.508	4.38183	1.61446	2.71412	0.0066453	0.0319759
PVP01_0820500	ABCI3	ABC transporter I family member 1, putative	121.298	-2.10711	0.776846	-2.71239	0.00668002	0.0321134
PVP01_0420400	HT	hexose transporter	178.406	-2.81935	1.03998	-2.71097	0.00670869	0.0322215
PVP01_1209400		conserved Plasmodium protein, unknown function	83.0194	2.01155	0.742627	2.70869	0.00675498	0.0323842
PVP01_0533300		STP1 protein	3.07372	-4.81116	1.77605	-2.7089	0.00675066	0.0323842
PVP01_1142200		coatomer alpha subunit, putative	166.848	-1.90205	0.702478	-2.70763	0.00677655	0.0324577
PVP01_0820900		ubiquitin-conjugating enzyme E2, putative	4.49113	-3.69433	1.36481	-2.70684	0.00679272	0.0325053
PVP01_0212400		conserved Plasmodium protein, unknown function	18.2271	-3.29312	1.21803	-2.70364	0.00685845	0.0327898
PVP01_0004670		PIR protein	5.41126	-3.94604	1.46126	-2.70043	0.0069249	0.0330772
PVP01_0005900		PIR protein	3.10014	-4.77772	1.7701	-2.69913	0.00695203	0.0331764
PVP01_0926900	RPS18	40S ribosomal protein S18, putative	213.288	-2.35674	0.874524	-2.69488	0.00704143	0.0335416
PVP01_0420100		conserved Plasmodium protein, unknown function	51.2619	4.08285	1.51489	2.69514	0.00703584	0.0335416
PVP01_1241700	COG6	conserved oligomeric Golgi complex subunit 6, putative	23.6281	-3.08384	1.14606	-2.69081	0.00712783	0.0338605
PVP01_1256400		S-adenosylmethionine-dependent methyltransferase, putative	25.663	-2.80593	1.04273	-2.69096	0.00712468	0.0338605
PVP01_0008650		PIR protein	4.43426	-5.21675	1.9386	-2.69099	0.00712403	0.0338605
PVP01_1249500		conserved Plasmodium protein, unknown function	100.886	-1.38304	0.514454	-2.68836	0.0071805	0.0340796
PVP01_1458500		RNA-binding protein, putative	294.588	1.61311	0.600491	2.68632	0.00722429	0.0342563
PVP01_0604400		conserved Plasmodium protein, unknown function	21.6096	5.22253	1.94455	2.68573	0.0072371	0.0342858
PVP01_1307600		conserved Plasmodium protein, unknown function	8.01917	3.86844	1.44143	2.68374	0.00728027	0.0344591
PVP01_1027100	ROM4	rhomboid protease ROM4, putative	65.6105	2.38297	0.888565	2.68182	0.00732239	0.034627
PVP01_0815300	CysRS	cysteine--tRNA ligase, putative	107.523	-1.78722	0.667087	-2.67914	0.00738105	0.0347783
PVP01_1464900	DPAP2	dipeptidyl aminopeptidase 2, putative	78.6379	4.45888	1.66429	2.67915	0.00738096	0.0347783
PVP01_0613900		conserved Plasmodium protein, unknown function	7.52381	2.79142	1.04182	2.67937	0.00737607	0.0347783
PVP01_1124300		conserved Plasmodium protein, unknown function	26.9712	2.52976	0.943974	2.6799	0.00736439	0.0347783
PVP01_1108400		conserved Plasmodium protein, unknown function	15.9456	-2.87465	1.07357	-2.67765	0.00741403	0.0349022
PVP01_0108200		cytoskeleton associated protein, putative	14.3034	2.53705	0.947987	2.67625	0.00744504	0.0350165
PVP01_0707100		ribosomal RNA methyltransferase, putative	15.5163	-3.12764	1.1692	-2.67503	0.00747217	0.0351125
PVP01_1012500		conserved Plasmodium protein, unknown function	18.9081	-3.0369	1.13558	-2.67432	0.00748817	0.035156
PVP01_1237500	PNO1	pre-rRNA-processing protein PNO1, putative	25.0614	-2.1961	0.821671	-2.67272	0.00752383	0.0352916
PVP01_1315400		queuine tRNA-ribosyltransferase, putative	12.0042	-3.01446	1.12807	-2.67223	0.00753485	0.0353116
PVP01_0314500		conserved Plasmodium protein, unknown function	9.27525	3.04523	1.14013	2.67096	0.00756357	0.0354143
PVP01_1125700	TKL4	tyrosine kinase-like protein, putative	514.807	1.7778	0.665766	2.67031	0.00757813	0.0354189
PVP01_0923600		conserved Plasmodium protein, unknown function	424.42	2.15574	0.807279	2.67038	0.00757652	0.0354189
PVP01_0003330		PIR protein	2.84358	-4.6508	1.74282	-2.66854	0.00761809	0.0355738
PVP01_1453000		conserved Plasmodium protein, unknown function	38.4482	2.39061	0.896273	2.66728	0.00764684	0.0356762
PVP01_0417500		serine-repeat antigen (SERA), truncated	7.8329	3.23434	1.21376	2.66472	0.00770531	0.0359168
PVP01_1425500	FeSOD	superoxide dismutase [Fe], putative	39.8259	-1.66825	0.626338	-2.6635	0.00773324	0.0360148
PVP01_0613000	DHHC10	palmitoyltransferase DHHC10, putative	34.7033	4.06364	1.52656	2.66197	0.00776853	0.0361469
PVP01_0620300		conserved Plasmodium protein, unknown function	9.79897	3.00705	1.13012	2.66082	0.00779508	0.0362381
PVP01_0623000		Plasmodium exported protein (PHIST), unknown function	16.148	2.8469	1.07006	2.66051	0.00780229	0.0362393
PVP01_1446100		RNA pseudouridylate synthase, putative	11.3146	-2.78119	1.04689	-2.65663	0.00789257	0.036626
PVP01_0003290		PIR protein	4.34691	5.86467	2.20918	2.65468	0.00793842	0.036806
PVP01_1131000		malate dehydrogenase, putative	45.1375	2.78508	1.0495	2.65371	0.00796112	0.0368785
PVP01_0702900		prefoldin subunit 4, putative	13.0766	-3.16656	1.19379	-2.65252	0.00798931	0.0369763
PVP01_1005700		AP-1 complex subunit beta, putative	56.672	-1.52704	0.576148	-2.65043	0.00803905	0.0371735
PVP01_0311200		conserved Plasmodium protein, unknown function	94.769	1.35773	0.512331	2.65011	0.00804655	0.0371752
PVP01_1446500	NEK1	NIMA related kinase 1, putative	76.9858	2.84159	1.07252	2.64945	0.00806235	0.0372152
PVP01_0822000		stomatin-like protein	16.8313	-2.37871	0.898085	-2.64865	0.00808149	0.0372706
PVP01_0724600		protein kinase, putative	1162.36	1.60058	0.604813	2.64641	0.00813516	0.037485
PVP01_0532500		Plasmodium exported protein (PHIST), unknown function	42.9754	5.43886	2.05601	2.64535	0.00816069	0.0375694
PVP01_0418800	AROM	pentafunctional AROM polypeptide, putative	141.91	-2.05119	0.775732	-2.6442	0.00818845	0.0376439
PVP01_0622500		GDP dissociation inhibitor, putative	17.8514	-2.71407	1.02647	-2.64408	0.0081913	0.0376439
PVP01_0919400	ARC40	actin-related protein 2/3 complex subunit 1, putative	14.009	5.24304	1.98555	2.6406	0.00827586	0.037765
PVP01_0105500	ORC2	origin recognition complex subunit 2, putative	58.1344	2.61723	0.991256	2.64032	0.00828281	0.037765
PVP01_0721500	RPB3	DNA-directed RNA polymerase II subunit RPB3, putative	29.7684	-2.30262	0.872013	-2.64058	0.00827642	0.037765
PVP01_0900700		PIR protein	64.2927	5.71917	2.16598	2.64045	0.00827964	0.037765
PVP01_0826300		conserved Plasmodium protein, unknown function	76.0033	2.68541	1.01646	2.64192	0.00824375	0.037765
PVP01_0203400		eukaryotic translation initiation factor 4E, putative	92.0584	-1.54901	0.586622	-2.64055	0.00827707	0.037765
PVP01_0622400		antigen UB05, putative	40.4208	-2.38029	0.901268	-2.64104	0.00826516	0.037765
PVP01_1013600		U6 snRNA-associated Sm-like protein LSm2, putative	14.5128	-2.57967	0.976316	-2.64225	0.00823583	0.037765
PVP01_0940000		VPS9 domain-containing protein, putative	15.5219	-2.75263	1.04203	-2.64159	0.0082517	0.037765
PVP01_0821600		conserved Plasmodium protein, unknown function	87.7026	2.24662	0.851155	2.63949	0.00830301	0.037824
PVP01_1457200		50S ribosomal protein L23, putative	15.7105	-3.34146	1.26709	-2.6371	0.00836172	0.0380582
PVP01_1012200	DDX1	ATP-dependent RNA helicase DDX1, putative	54.225	-2.99914	1.13759	-2.6364	0.00837909	0.038104
PVP01_0104900	PPAT	phosphopantetheine adenylyltransferase, putative	16.367	-2.13315	0.809279	-2.63586	0.00839239	0.0381108
PVP01_0529400		zinc finger protein, putative	381.43	2.04559	0.776094	2.63575	0.00839519	0.0381108
PVP01_1008000	IMC1g	inner membrane complex protein 1g, putative	9.27305	3.68334	1.3978	2.6351	0.00841116	0.0381227
PVP01_1225300		conserved Plasmodium protein, unknown function	14.0133	3.89766	1.47916	2.63505	0.00841244	0.0381227
PVP01_0830700	AS	asparagine synthetase [glutamine-hydrolyzing], putative	83.2967	-2.55158	0.968543	-2.63445	0.00842742	0.0381244
PVP01_0700200		PIR protein	14.605	-3.01447	1.14416	-2.63467	0.00842194	0.0381244
PVP01_0947800		tubulin--tyrosine ligase, putative	156.164	3.50815	1.33272	2.63231	0.00848052	0.0383294
PVP01_1246000		snRNA-activating protein complex subunit 3, putative	7.19612	-3.17213	1.2052	-2.63204	0.00848744	0.0383294
PVP01_1205000		conserved Plasmodium protein, unknown function	12.482	-2.93816	1.11742	-2.62942	0.00855297	0.038592
PVP01_0007340		PIR protein, pseudogene	14.3306	-4.2515	1.61898	-2.62604	0.00863847	0.0389441
PVP01_0112900		proteasome subunit alpha type-6, putative	42.3261	-1.933	0.736254	-2.62545	0.00865338	0.038974
PVP01_1014000		conserved Plasmodium protein, unknown function	32.2991	-2.01668	0.768205	-2.62519	0.00866005	0.038974
PVP01_0911000	PRPF6	pre-mRNA-processing factor 6, putative	78.2442	-1.27379	0.485379	-2.62433	0.00868206	0.0390393
PVP01_0302400		pre-mRNA splicing factor, putative	36.3983	2.08627	0.795076	2.624	0.0086905	0.0390436
PVP01_0601700		Plasmodium exported protein (PHIST), unknown function	22.7454	4.91224	1.87285	2.62287	0.00871927	0.0391391
PVP01_0943900		DnaJ protein, putative	46.5537	-2.94958	1.12659	-2.61814	0.00884109	0.0396519
PVP01_0307100		conserved Plasmodium protein, unknown function	146.777	3.35873	1.28545	2.61289	0.00897808	0.0401971
PVP01_1021500		conserved Plasmodium protein, unknown function	21.6639	1.98933	0.761286	2.61311	0.00897213	0.0401971
PVP01_0905500	RPC25	DNA-directed RNA polymerase III subunit RPC8, putative	14.8398	-2.68162	1.02671	-2.61185	0.00900547	0.0402162
PVP01_0727500	TAF7	transcription initiation factor TFIID subunit 7, putative	16.8296	-2.04542	0.783056	-2.6121	0.00899875	0.0402162
PVP01_1444200		conserved Plasmodium protein, unknown function	18.4887	-2.93035	1.1219	-2.61196	0.00900253	0.0402162
PVP01_0116400		proteasome subunit beta type-4, putative	45.217	-2.04409	0.782784	-2.61131	0.00901963	0.040245
PVP01_0809100		conserved Plasmodium protein, unknown function	12.0872	4.92362	1.88591	2.61073	0.00903481	0.0402782
PVP01_0928400		conserved Plasmodium protein, unknown function	24.449	3.33676	1.27832	2.61027	0.00904707	0.0402985
PVP01_1217000		conserved Plasmodium protein, unknown function	8.82143	3.60469	1.38227	2.6078	0.00911251	0.0405553
PVP01_0710500		conserved Plasmodium protein, unknown function	18.2795	3.08673	1.18429	2.60639	0.00915031	0.0406889
PVP01_1137300		conserved Plasmodium protein, unknown function	14.1264	3.83776	1.47452	2.60272	0.00924871	0.0410914
PVP01_1256900	SRP54	signal recognition particle subunit SRP54, putative	44.2994	-1.51571	0.582934	-2.60014	0.00931853	0.0413312
PVP01_1101500		Plasmodium exported protein, unknown function	110.915	-1.39419	0.536146	-2.6004	0.0093115	0.0413312
PVP01_0701800	DDX60	ATP-dependent RNA helicase DDX60, putative	293.748	-1.90091	0.731757	-2.59773	0.00938418	0.0415109
PVP01_0710400	ICP	inhibitor of cysteine proteases, putative	126.757	-1.56489	0.602386	-2.59782	0.00938184	0.0415109
PVP01_1327500	RPC34	DNA-directed RNA polymerase III subunit RPC6, putative	17.6109	-1.93555	0.745161	-2.59749	0.00939088	0.0415109
PVP01_1320300		50S ribosomal protein L15, putative	22.9362	-1.71616	0.660562	-2.59804	0.00937587	0.0415109
PVP01_0318100	OLA1	Obg-like ATPase 1, putative	82.8769	-1.52812	0.588835	-2.59516	0.00945477	0.0417579
PVP01_0517400	HMGB2	high mobility group protein B2, putative	38.0725	3.09617	1.19333	2.59457	0.00947106	0.0417806
PVP01_0723600		conserved Plasmodium protein, unknown function	25.0083	3.7129	1.43113	2.59439	0.00947594	0.0417806
PVP01_1427800		karyopherin alpha, putative	80.2829	-1.82064	0.701927	-2.59377	0.00949287	0.0418199
PVP01_0941000		P-loop containing nucleoside triphosphate hydrolase, putative	38.2644	3.112	1.20057	2.59211	0.00953884	0.041987
PVP01_1319000	ATG5	autophagy protein 5, putative	14.0583	-2.45317	0.94663	-2.59148	0.00955641	0.0420289
PVP01_0602900		conserved Plasmodium protein, unknown function	19.4362	2.83795	1.09571	2.59007	0.00959573	0.0421662
PVP01_0836700		spindle pole body protein, putative	39.547	1.96678	0.759881	2.58828	0.00964569	0.0423501
PVP01_1128000	RPP1	ribonuclease P/MRP protein subunit RPP1, putative	33.8823	-1.84718	0.713769	-2.58792	0.00965582	0.0423589
PVP01_0711600	EF-1beta	elongation factor 1-beta, putative	66.4476	-1.48282	0.573478	-2.58565	0.00971944	0.0426022
PVP01_0829400		conserved Plasmodium protein, unknown function	8.51668	-3.02015	1.1685	-2.58464	0.00974811	0.042692
PVP01_0820400		conserved Plasmodium protein, unknown function	17.1472	2.34167	0.906167	2.58415	0.00976184	0.0427163
PVP01_0610000	EXP3	exported protein 3, putative	1902.19	1.32298	0.512502	2.58142	0.0098395	0.0429121
PVP01_0823900		conserved Plasmodium protein, unknown function	78.7831	1.92694	0.7464	2.58164	0.0098331	0.0429121
PVP01_1454300		conserved Plasmodium protein, unknown function	20.299	1.64457	0.636906	2.58212	0.00981942	0.0429121
PVP01_1424700		GTP-binding translation elongation factor tu family protein, putative	25.2875	-2.66991	1.03417	-2.58169	0.00983174	0.0429121
PVP01_1470000		Plasmodium exported protein, unknown function	372.113	-1.54578	0.598977	-2.58069	0.00986021	0.0429665
PVP01_1113200	YOP1L	YOP1-like protein, putative	12.034	-2.78644	1.08024	-2.57946	0.00989542	0.0430839
PVP01_0507700	VAMP7	SNARE protein, putative	32.7466	-2.76378	1.07183	-2.57855	0.00992165	0.0431621
PVP01_0514700		conserved Plasmodium protein, unknown function	28.2778	3.899	1.5127	2.57751	0.00995138	0.0432553
PVP01_1307000		conserved Plasmodium protein, unknown function	8.55562	-3.20318	1.24369	-2.57553	0.0100085	0.0434676
PVP01_0612700		topoisomerase, putative	91.2564	1.24519	0.483674	2.57443	0.0100405	0.0434975
PVP01_1244500		GTP-binding protein, putative	92.9194	-1.34659	0.522978	-2.57485	0.0100283	0.0434975
PVP01_1439800		conserved Plasmodium protein, unknown function	24.0078	-2.75845	1.07147	-2.57445	0.01004	0.0434975
PVP01_1439400		conserved Plasmodium protein, unknown function	13.465	4.74526	1.84395	2.57342	0.01007	0.0435893
PVP01_1316300		conserved Plasmodium protein, unknown function	29.3467	2.59678	1.00939	2.57262	0.0100931	0.0436532
PVP01_0002420		PIR protein	2.17363	-4.29426	1.67013	-2.57122	0.0101341	0.0437943
PVP01_1421000		TBC domain protein, putative	29.2991	2.30773	0.897778	2.57049	0.0101555	0.0438503
PVP01_0533100	TRAG13	tryptophan-rich protein	117.058	2.76642	1.07687	2.56894	0.0102009	0.0440097
PVP01_1107600		conserved Plasmodium protein, unknown function	667.096	1.87224	0.728951	2.56841	0.0102166	0.0440228
PVP01_0408500		conserved Plasmodium protein, unknown function	31.5503	-2.80065	1.09048	-2.56827	0.0102208	0.0440228
PVP01_0708800		conserved Plasmodium protein, unknown function	14.9327	-2.862	1.11521	-2.56633	0.0102782	0.0442336
PVP01_0832100		zinc finger protein, putative	48.6405	1.28354	0.500395	2.56505	0.0103162	0.0443559
PVP01_0010990		Plasmodium exported protein, unknown function	113.774	-2.12544	0.828697	-2.5648	0.0103236	0.0443559
PVP01_0414800		60S ribosomal protein L37ae, putative	141.041	-2.04625	0.798147	-2.56375	0.0103548	0.0444531
PVP01_1320200	AP2-O3	AP2 domain transcription factor AP2-O3, putative	32.7539	3.55251	1.38587	2.56338	0.0103659	0.0444644
PVP01_1122000	DJ1	protein DJ-1, putative	119.036	-1.40711	0.549253	-2.56186	0.0104114	0.0446227
PVP01_0530800		alpha tubulin 2, putative	718.945	2.88767	1.12976	2.55599	0.0105885	0.0453444
PVP01_1024800	LRR2	leucine-rich repeat protein	32.4224	2.80253	1.09804	2.5523	0.0107015	0.0457909
PVP01_0527400		conserved Plasmodium protein, unknown function	309.357	1.72122	0.674718	2.55101	0.010741	0.0459222
PVP01_0708300	SNRPD3	small nuclear ribonucleoprotein Sm D3, putative	18.6307	-3.51352	1.37833	-2.54911	0.0107997	0.0461111
PVP01_1252200		conserved Plasmodium protein, unknown function	6.86725	3.92727	1.5407	2.54901	0.0108029	0.0461111
PVP01_1457800	FTSH1	ATP-dependent zinc metalloprotease FTSH 1, putative	59.3567	-2.43395	0.956265	-2.54527	0.0109193	0.0464938
PVP01_1205300		conserved Plasmodium protein, unknown function	176.347	-1.62401	0.638039	-2.54531	0.010918	0.0464938
PVP01_0932200		conserved Plasmodium protein, unknown function	41.9743	-1.73588	0.681935	-2.54552	0.0109115	0.0464938
PVP01_1436400	APC10	anaphase-promoting complex subunit 10, putative	9.69036	3.1645	1.2437	2.54441	0.0109461	0.0465699
PVP01_1016200	DCX	apicortin, putative	13.4971	2.25534	0.886585	2.54385	0.0109639	0.0465699
PVP01_0713300		BSD-domain protein, putative	73.0977	1.5703	0.617282	2.54389	0.0109627	0.0465699
PVP01_1014500	RPS24	40S ribosomal protein S24, putative	161.278	-2.25319	0.885848	-2.54354	0.0109736	0.0465729
PVP01_1029600		ATP-dependent helicase, putative	32.7813	-2.70003	1.0624	-2.54144	0.0110396	0.046815
PVP01_0709800	CRMP1	cysteine repeat modular protein 1, putative	19.7574	2.44537	0.962381	2.54096	0.011055	0.0468422
PVP01_1335100	DPH1	diphthamide biosynthesis protein 1, putative	25.6657	-3.21002	1.26361	-2.54036	0.0110739	0.0468843
PVP01_0713700		conserved Plasmodium protein, unknown function	73.9823	1.60236	0.630949	2.5396	0.011098	0.0469482
PVP01_1031900	IspE	4-diphosphocytidyl-2-C-methyl-D-erythritol kinase, putative	24.6093	2.10887	0.831024	2.53768	0.011159	0.0471681
PVP01_0424000		PIR protein	6.4454	2.94754	1.1617	2.53727	0.0111719	0.0471844
PVP01_1018400		amino acid transporter, putative	27.2876	3.30446	1.30264	2.53674	0.0111888	0.0472177
PVP01_0923500		dynein heavy chain, putative	677.224	3.26524	1.28757	2.53597	0.0112136	0.0472359
PVP01_1031800		conserved Plasmodium protein, unknown function	61.8889	2.82447	1.11377	2.53597	0.0112137	0.0472359
PVP01_1212500		tetratricopeptide repeat protein, putative	37.9154	-1.81421	0.715449	-2.53576	0.0112203	0.0472359
PVP01_1145300		conserved Plasmodium protein, unknown function	265.062	1.12013	0.442343	2.53227	0.0113326	0.04767
PVP01_1265900		KS1 protein precursor, putative	295.899	2.60253	1.0281	2.5314	0.0113609	0.0477506
PVP01_0811200		conserved Plasmodium protein, unknown function	22.2528	-1.73883	0.687009	-2.53101	0.0113734	0.0477644
PVP01_1402700		Plasmodium exported protein, unknown function	428.641	1.2351	0.488158	2.53013	0.011402	0.0478463
PVP01_0308200	KAE1	tRNA N6-adenosine threonylcarbamoyltransferase, putative	31.9706	1.4561	0.576002	2.52794	0.0114734	0.0480386
PVP01_0616500	OTU	OTU-like cysteine protease, putative	30.4527	2.03919	0.806528	2.52835	0.01146	0.0480386
PVP01_1222900		glutamine--tRNA ligase, putative	372.483	-1.49302	0.590621	-2.52788	0.0114755	0.0480386
PVP01_0615800		RNA methyltransferase, putative	14.4857	-2.65126	1.04907	-2.52724	0.0114962	0.0480866
PVP01_1302100		conserved Plasmodium protein, unknown function	15.9635	1.96809	0.779507	2.52479	0.0115767	0.0483847
PVP01_1215100		conserved Plasmodium protein, unknown function	52.7802	2.22152	0.880406	2.52329	0.0116264	0.0485534
PVP01_1252400		ribosomal protein S11, putative	9.34671	-3.34947	1.32792	-2.52234	0.0116578	0.0486456
PVP01_0110600		conserved Plasmodium protein, unknown function	65.5845	3.66815	1.45452	2.52189	0.0116727	0.0486687
PVP01_MIT01200		unspecified product	642.98	2.02469	0.803762	2.51902	0.0117683	0.0489893
PVP01_0735000		Plasmodium exported protein, unknown function	684.015	-2.04428	0.811451	-2.5193	0.011759	0.0489893
PVP01_0717900	MFS3	major facilitator superfamily domain-containing protein, putative	42.7488	-1.36101	0.5406	-2.5176	0.0118157	0.0491474
PVP01_0530900	RPS19	40S ribosomal protein S19, putative	233.947	-2.31619	0.920294	-2.51679	0.011843	0.0492214
PVP01_0807400	AP2-I	AP2 domain transcription factor AP2-I, putative	114.493	-1.24682	0.495555	-2.51602	0.011869	0.0492903
PVP01_0906400	PTEX88	translocon component PTEX88, putative	156.629	-1.87986	0.747889	-2.51356	0.011952	0.0495956
PVP01_1129700		conserved Plasmodium protein, unknown function	85.1721	-1.83497	0.730843	-2.51075	0.0120474	0.0499519
PVP01_1217200		conserved Plasmodium protein, unknown function	160.097	3.28953	1.31043	2.51026	0.0120641	0.0499813
PVP01_1312100	PANK2	pantothenate kinase 2, putative	33.9685	-2.97834	1.18661	-2.50996	0.0120744	0.0499841
PVP01_1232200			16.3548	3.14518	1.2533	2.50952	0.0120894	0.0500064
PVP01_1433300			32.225	3.62238	1.44446	2.50777	0.0121496	0.0502156
PVP01_0532700			140.528	1.31046	0.523131	2.50503	0.0122439	0.0505657
PVP01_0941400			389.567	-1.05599	0.422185	-2.50124	0.0123759	0.0510704
PVP01_1101300			857.119	1.66925	0.66771	2.49997	0.0124205	0.0512138
PVP01_1448800			14.4569	-3.14004	1.25694	-2.49817	0.0124837	0.0514338
PVP01_0800900			18.8941	3.57244	1.43213	2.4945	0.0126136	0.0519279
PVP01_1425800			5.13278	3.01577	1.20962	2.49316	0.0126613	0.0520462
PVP01_0807800			369.812	-1.13291	0.454415	-2.49313	0.0126623	0.0520462
PVP01_1471300			11.4254	2.83496	1.13783	2.49156	0.0127184	0.0522358
PVP01_0313800			277.532	2.30168	0.924808	2.48882	0.0128167	0.0525605
PVP01_1241600			14.3602	-3.10246	1.24657	-2.4888	0.0128177	0.0525605
PVP01_0527500			117.284	1.62303	0.652413	2.48773	0.0128561	0.0526767
PVP01_1451400			77.8475	2.75233	1.10803	2.48399	0.0129921	0.053192
PVP01_1012000			56.5479	2.63322	1.06063	2.48268	0.0130397	0.0533452
PVP01_0410400			6.44017	-3.52374	1.41954	-2.48232	0.0130531	0.0533583
PVP01_0905800			940.327	2.6861	1.08289	2.48049	0.0131201	0.0535386
PVP01_1208500			87.2933	1.67159	0.67401	2.48007	0.0131358	0.0535386
PVP01_1239600			51.6211	-2.06408	0.832288	-2.48001	0.0131378	0.0535386
PVP01_1262700			21.5233	-2.89245	1.16631	-2.48	0.0131383	0.0535386
PVP01_1322400			13.9519	1.95241	0.787429	2.47947	0.0131578	0.0535761
PVP01_0824200			15.9401	3.89217	1.57	2.47909	0.0131716	0.0535907
PVP01_0306200			16.4119	2.10626	0.84978	2.47859	0.0131903	0.0536248
PVP01_0811500			47.5386	-1.64965	0.666161	-2.47635	0.0132735	0.0539209
PVP01_0838800			2.14021	4.78058	1.93239	2.47392	0.0133639	0.0541615
PVP01_0827800			59.4869	2.21659	0.895906	2.47414	0.0133558	0.0541615
PVP01_1140400			49.3152	-1.29249	0.522379	-2.47424	0.0133518	0.0541615
PVP01_1332500			55.8634	3.51082	1.42015	2.47215	0.0134304	0.0543466
PVP01_0117500			16.2575	2.20294	0.89106	2.47227	0.0134259	0.0543466
PVP01_0714500			19.0153	1.94985	0.788816	2.47187	0.0134408	0.0543466
PVP01_1307400			7.56194	-2.65504	1.075	-2.4698	0.013519	0.0546203
PVP01_0717500			54.7367	-1.48628	0.601942	-2.46914	0.0135438	0.0546783
PVP01_0829300			21.3575	2.32307	0.941826	2.46656	0.0136416	0.0550308
PVP01_1425700			17.1429	3.86213	1.56599	2.46626	0.0136532	0.055035
PVP01_0207700			45.4716	2.50298	1.01625	2.46294	0.0137802	0.0555037
PVP01_0725600			83.6233	1.96739	0.799078	2.46207	0.0138137	0.055553
PVP01_0112500			69.7816	-1.61829	0.657242	-2.46224	0.0138072	0.055553
PVP01_1341100			28.9318	3.26876	1.32858	2.46035	0.0138803	0.0557349
PVP01_0915400			81.3413	-1.40273	0.570087	-2.46055	0.0138725	0.0557349
PVP01_1208800			12.901	2.8979	1.17851	2.45895	0.0139343	0.0559085
PVP01_0618300			340.262	3.46246	1.41228	2.45168	0.0142191	0.0570074
PVP01_0914600			22.0009	-2.52481	1.03062	-2.4498	0.0142934	0.0572616
PVP01_1304200			40.522	-2.1876	0.893376	-2.44869	0.0143378	0.0573954
PVP01_1329600			10.2465	-3.21963	1.31568	-2.44712	0.0144002	0.0576008
PVP01_1445800			53.176	2.25605	0.92211	2.44661	0.0144206	0.057638
PVP01_0721900			120.853	1.39506	0.570525	2.44522	0.0144762	0.057816
PVP01_1207700			13.333	3.17007	1.29704	2.44408	0.014522	0.0579548
PVP01_1119300			35.1551	3.92024	1.60417	2.44379	0.014534	0.0579582
PVP01_1400100			2.75869	5.15053	2.10793	2.4434	0.0145495	0.0579758
PVP01_1228700			57.9359	2.38494	0.976928	2.44127	0.0146359	0.058231
PVP01_1137400			435.332	0.913374	0.374122	2.44138	0.0146313	0.058231
PVP01_0801100			274.071	-1.42683	0.585543	-2.43675	0.0148197	0.0589174
PVP01_1239800			25.4789	1.85837	0.76298	2.43567	0.0148641	0.058973
PVP01_1102500			60.5868	-1.50715	0.618799	-2.4356	0.014867	0.058973
PVP01_1137000			144.312	-1.72557	0.708482	-2.43559	0.0148676	0.058973
PVP01_1343500			46.7741	-1.61939	0.665234	-2.43432	0.0149196	0.059103
PVP01_0317300			192.099	-1.76091	0.723391	-2.43424	0.0149231	0.059103
PVP01_1411700			7.97245	4.28589	1.76157	2.433	0.0149744	0.0592207
PVP01_1470700			239.233	1.5147	0.622573	2.43297	0.0149755	0.0592207
PVP01_1004700			7.09701	-2.7348	1.12425	-2.43256	0.0149924	0.0592425
PVP01_0835000			70.9395	1.55094	0.638095	2.43057	0.0150749	0.0595238
PVP01_1342000			15.7034	2.10167	0.86488	2.43001	0.0150983	0.0595711
PVP01_0718600			94.2924	1.88236	0.77502	2.42879	0.0151491	0.0597262
PVP01_0715900			51.9994	2.31264	0.952474	2.42804	0.0151808	0.0598061
PVP01_1105200			40.9126	-2.22254	0.915711	-2.42712	0.0152194	0.0599128
PVP01_1471900			120.028	-1.21349	0.500086	-2.42657	0.0152423	0.0599578
PVP01_1019400			28.5291	3.77325	1.55539	2.42592	0.0152696	0.0600197
PVP01_1147000			5.63535	-3.58265	1.47723	-2.42524	0.0152981	0.0600867
PVP01_1131700			807.251	3.00142	1.23792	2.42455	0.0153272	0.0601438
PVP01_0936500			126.979	2.85686	1.1784	2.42435	0.0153357	0.0601438
PVP01_0621600			18.523	5.40501	2.23027	2.42347	0.0153728	0.0602263
PVP01_0813800			11.3026	-3.06896	1.26643	-2.42331	0.0153799	0.0602263
PVP01_0813700			35.2463	2.25527	0.930992	2.42244	0.0154167	0.0603252
PVP01_0823200			38.4501	-2.04507	0.844333	-2.42212	0.0154303	0.0603332
PVP01_0117000			25.0213	3.05487	1.26147	2.42168	0.0154489	0.0603605
PVP01_1425400			17.1454	-2.62879	1.0859	-2.42085	0.0154844	0.060454
PVP01_0834300			18.7804	3.39873	1.40461	2.41969	0.0155337	0.060601
PVP01_1210300			6.3403	-2.95535	1.22199	-2.41847	0.0155859	0.0607595
PVP01_0609100			1672.57	1.5775	0.652601	2.41725	0.0156385	0.0609188
PVP01_1463500			40.148	3.13602	1.29788	2.41626	0.0156807	0.0610377
PVP01_1267900			120.377	-1.51047	0.625566	-2.41456	0.0157543	0.0612365
PVP01_1263100			53.5597	-2.88418	1.19451	-2.41454	0.0157552	0.0612365
PVP01_0915900			140.259	3.94223	1.63298	2.41414	0.0157726	0.0612582
PVP01_0415100			52.7652	1.37387	0.569372	2.41296	0.0158234	0.0614098
PVP01_1142500			34.3717	2.70842	1.12335	2.41102	0.0159081	0.0616468
PVP01_0615600			55.2914	-1.55616	0.645415	-2.4111	0.0159045	0.0616468
PVP01_1449700			6.18081	-3.39721	1.4094	-2.41039	0.0159354	0.0617068
PVP01_0617200			153.186	1.14743	0.476177	2.40966	0.0159672	0.061784
PVP01_0931500			128.911	3.17187	1.31655	2.40924	0.0159859	0.0618107
PVP01_1431500			6.58995	-2.8364	1.17776	-2.40831	0.0160267	0.0619224
PVP01_0707500			49.4659	3.40382	1.41418	2.40693	0.0160873	0.0621105
PVP01_0518400			22.02	3.88144	1.61389	2.40502	0.0161717	0.0623463
PVP01_1449800			123.842	1.58176	0.657694	2.405	0.0161723	0.0623463
PVP01_0918500			38.5814	2.45151	1.01974	2.40406	0.0162142	0.0624617
PVP01_1268000			9.77599	-2.55343	1.06246	-2.40332	0.016247	0.0625419
PVP01_1269400			22.1534	-2.64575	1.10131	-2.40237	0.0162894	0.062659
PVP01_1208400			477.216	1.00675	0.419697	2.39876	0.0164507	0.0632326
PVP01_0722700			30.6392	-2.10422	0.877403	-2.39824	0.016474	0.0632757
PVP01_0917800			71.1351	1.39573	0.582559	2.39586	0.0165812	0.0636081
PVP01_0619500			70.6897	1.20648	0.503693	2.39526	0.0166084	0.0636081
PVP01_0918800			148.626	-1.13476	0.473746	-2.39528	0.0166076	0.0636081
PVP01_1414300			46.0397	-1.5363	0.641397	-2.39524	0.0166093	0.0636081
PVP01_1429000			179.005	-1.32724	0.554195	-2.39489	0.0166254	0.0636175
PVP01_1220800			43.1782	-1.52572	0.637139	-2.39465	0.0166362	0.0636175
PVP01_0716400			108.357	3.48764	1.45815	2.39183	0.0167646	0.063921
PVP01_1032500			11.0394	2.58596	1.08094	2.39233	0.0167417	0.063921
PVP01_1311600			196.238	-1.1023	0.460832	-2.39198	0.0167577	0.063921
PVP01_0720900			43.2715	-1.35338	0.565832	-2.39184	0.0167641	0.063921
PVP01_0947200			46.4528	1.97062	0.824118	2.39119	0.0167939	0.0639859
PVP01_1242200			112.283	-1.30436	0.546086	-2.38856	0.0169144	0.0643981
PVP01_0814900			33.7541	2.87497	1.20389	2.38807	0.0169371	0.0644376
PVP01_0610400			27.3833	1.70186	0.713231	2.38613	0.0170266	0.064731
PVP01_1240000			104.353	0.971138	0.40731	2.38427	0.0171129	0.0650115
PVP01_0517500			10.4345	4.04261	1.69621	2.38332	0.0171571	0.0650845
PVP01_0305700			33.4281	-1.71287	0.718622	-2.38355	0.0171465	0.0650845
PVP01_1005000			34.8723	-1.51033	0.634376	-2.38081	0.0172746	0.0654827
PVP01_1136600			23.5374	3.42782	1.44075	2.37919	0.0173507	0.0657234
PVP01_1224600			33.7807	1.41812	0.596336	2.37805	0.0174044	0.0657835
PVP01_0303000			43.0056	-1.90059	0.799044	-2.37857	0.0173798	0.0657835
PVP01_0110700			16.1504	-1.95779	0.823225	-2.37819	0.0173978	0.0657835
PVP01_0421100			30.2057	3.07636	1.29469	2.37613	0.0174953	0.0660791
PVP01_1120800			9.63881	-2.68321	1.12959	-2.37538	0.0175311	0.0661666
PVP01_0208300			6.84433	2.3601	0.994205	2.37386	0.0176033	0.0663911
PVP01_0624000			188.791	1.28256	0.540431	2.37322	0.0176336	0.0664573
PVP01_API02800			172.668	1.99371	0.840538	2.37194	0.0176948	0.0666399
PVP01_0524000			157.908	-1.49077	0.629049	-2.36988	0.017794	0.0669648
PVP01_1025600			57.1739	2.52669	1.06634	2.36949	0.0178126	0.0669867
PVP01_1120100			108.046	-1.2163	0.513634	-2.36802	0.0178835	0.0672048
PVP01_0834000			53.8884	-2.30183	0.972939	-2.36585	0.0179887	0.0675514
PVP01_0823500			44.7281	-1.89656	0.801794	-2.3654	0.0180107	0.0675853
PVP01_0424500			2.12833	-3.29035	1.39181	-2.36408	0.018075	0.0677781
PVP01_0605800			315.378	1.15859	0.490281	2.36312	0.0181218	0.0679046
PVP01_0936700			4.01992	-2.7635	1.16959	-2.36278	0.0181382	0.0679174
PVP01_1435000			47.6529	-2.73003	1.15692	-2.35973	0.0182885	0.0684309
PVP01_1144500			19.839	1.95507	0.828852	2.35877	0.0183357	0.0685585
PVP01_0611000			8.74744	2.14104	0.908171	2.35752	0.0183973	0.0687393
PVP01_0826000			14.0094	2.21613	0.940484	2.35637	0.0184547	0.0689045
PVP01_1468800			14.2577	-2.42849	1.03108	-2.35529	0.0185081	0.0690547
PVP01_0527100			12.7008	1.76133	0.748275	2.35386	0.0185797	0.0692721
PVP01_0928600			25.9774	1.4947	0.635371	2.35248	0.0186487	0.0694797
PVP01_1143300			137.157	3.11102	1.3237	2.35024	0.0187611	0.0697489
PVP01_1225400			112.624	1.78554	0.759695	2.35034	0.0187565	0.0697489
PVP01_1466100			14.6757	-1.97058	0.838301	-2.35068	0.0187392	0.0697489
PVP01_0515300			50.0085	-1.20594	0.513261	-2.34957	0.0187953	0.0698265
PVP01_1231200			300.723	-1.8051	0.768698	-2.34826	0.0188613	0.0700219
PVP01_1415100			72.5405	1.84165	0.784518	2.34749	0.0189005	0.0701175
PVP01_1237800			6.6339	-3.06214	1.30525	-2.34602	0.0189749	0.0703434
PVP01_0117400			54.7857	3.48483	1.48642	2.34445	0.0190553	0.0705914
PVP01_0708700			473.098	0.833059	0.355401	2.344	0.0190783	0.0706263
PVP01_1022100			30.4071	-2.58687	1.10454	-2.34204	0.0191789	0.0709483
PVP01_1332600			13.9276	1.86279	0.795783	2.34082	0.0192413	0.0711182
PVP01_0311600			10.8851	-2.43147	1.03882	-2.34061	0.0192521	0.0711182
PVP01_1320700			54.2272	1.73785	0.742703	2.3399	0.0192889	0.0712039
PVP01_1400900			27.1326	2.29674	0.982049	2.33872	0.01935	0.0713787
PVP01_0926300			17.7325	2.64582	1.13172	2.33787	0.0193942	0.0714409
PVP01_0305500			110.518	-1.78505	0.76348	-2.33805	0.0193846	0.0714409
PVP01_1259200			31.7932	1.63066	0.697716	2.33713	0.0194322	0.0715301
PVP01_1137200			30.5877	-1.61609	0.691744	-2.33625	0.0194784	0.0716496
PVP01_0204000			15.8409	2.32481	0.996539	2.33289	0.0196541	0.072245
PVP01_0812700			72.8927	-2.89756	1.24441	-2.32847	0.0198874	0.0730511
PVP01_1323800			19.3898	2.86073	1.22983	2.32612	0.0200122	0.0734579
PVP01_1457400			6.89471	-3.14137	1.35291	-2.32192	0.020237	0.0742307
PVP01_1257000			37.6946	-2.67624	1.15305	-2.32101	0.0202861	0.0743587
PVP01_0709200			31.7989	2.16946	0.935119	2.31998	0.0203417	0.0744905
PVP01_0213100			71.7648	-1.88959	0.814543	-2.31982	0.0203506	0.0744905
PVP01_0941900			5.08731	3.11306	1.34246	2.31892	0.0203995	0.0746169
PVP01_1132000			42.6783	-1.41237	0.609354	-2.31782	0.0204593	0.0747831
PVP01_0605500			78.0308	2.7943	1.20632	2.31638	0.0205377	0.0749868
PVP01_1023900			188.487	2.50578	1.08182	2.31627	0.0205437	0.0749868
PVP01_0921200			549.163	2.24175	0.969473	2.31234	0.0207591	0.0757199
PVP01_0007730			14.8381	-6.80704	2.94669	-2.31006	0.0208846	0.0761244
PVP01_0922000			12.9025	2.41959	1.04788	2.30903	0.0209422	0.0762809
PVP01_1322200			125.409	1.71325	0.742132	2.30855	0.0209683	0.0763228
PVP01_0815100			2.94819	-3.15491	1.36795	-2.3063	0.0210937	0.0767258
PVP01_0524300			10.2008	2.11612	0.917702	2.30589	0.0211167	0.076756
PVP01_0300600			50.5742	2.34555	1.01736	2.30552	0.0211373	0.0767772
PVP01_1131800			16.9467	3.41301	1.48092	2.30466	0.0211857	0.0768495
PVP01_0806500			577.043	-1.37504	0.596638	-2.30464	0.0211866	0.0768495
PVP01_0211200			18.2941	1.54588	0.670933	2.30407	0.0212187	0.076886
PVP01_1209000			101.521	-1.27898	0.55513	-2.30394	0.0212262	0.076886
PVP01_1133300			84.7576	1.32543	0.575601	2.30269	0.0212966	0.0770873
PVP01_0502400			10.7942	2.34505	1.01889	2.30159	0.0213585	0.077258
PVP01_1315800			72.0324	-1.5327	0.666149	-2.30084	0.0214006	0.0773566
PVP01_0406100			5.94823	-2.89529	1.26007	-2.29771	0.0215781	0.077944
PVP01_0933600			22.0517	1.83513	0.799073	2.29657	0.0216432	0.0780712
PVP01_1403200			13.0686	1.81942	0.792221	2.29661	0.0216411	0.0780712
PVP01_1418700			175.206	-2.133	0.929209	-2.2955	0.0217043	0.0782374
PVP01_0704900			41.3955	3.78461	1.64927	2.29472	0.0217492	0.0783453
PVP01_1135400			59.8416	-1.17562	0.512408	-2.29431	0.0217728	0.078376
PVP01_0948400			15.1355	2.53739	1.10674	2.29267	0.0218672	0.0786075
PVP01_1107500			23.3496	-2.40544	1.04919	-2.29267	0.0218672	0.0786075
PVP01_1210900			34.8012	-1.77374	0.774025	-2.29158	0.0219299	0.0787785
PVP01_0727600			11.5262	-2.63657	1.15104	-2.2906	0.0219867	0.0789282
PVP01_1239500			7.10551	-2.79182	1.2199	-2.28856	0.0221048	0.0792976
PVP01_1411000			16.7894	2.0225	0.884601	2.28634	0.0222344	0.0796119
PVP01_1452400			59.9367	1.60042	0.700157	2.28581	0.0222655	0.0796119
PVP01_1114200			86.6955	-1.10311	0.482602	-2.28575	0.0222688	0.0796119
PVP01_1236200			12.9086	-2.12606	0.930076	-2.2859	0.0222599	0.0796119
PVP01_1428800			19.998	-2.54159	1.11168	-2.28626	0.0222391	0.0796119
PVP01_1009600			23.5462	-1.6432	0.71897	-2.28549	0.0222842	0.0796127
PVP01_1431800			265.512	1.38861	0.607938	2.28413	0.022364	0.079843
PVP01_0803500			188.176	1.35018	0.591583	2.28232	0.0224705	0.0801682
PVP01_0901800			45.533	-1.80299	0.790573	-2.28062	0.0225711	0.0804722
PVP01_1229400			176.099	2.43318	1.06714	2.28009	0.0226022	0.0805236
PVP01_1416300			86.5278	-1.89765	0.832358	-2.27985	0.0226164	0.0805236
PVP01_1266700			31.947	-1.79588	0.787934	-2.27923	0.0226537	0.0806013
PVP01_0613800			13.0533	4.88678	2.14575	2.27742	0.0227612	0.0809141
PVP01_1262500			55.84	2.21442	0.972419	2.27723	0.0227726	0.0809141
PVP01_0719500			5.91505	3.8105	1.67459	2.27549	0.0228767	0.0812285
PVP01_0507000			11.9771	4.57703	2.01353	2.27314	0.0230179	0.0816745
PVP01_1026600			7.94515	3.91506	1.72318	2.272	0.0230866	0.0818626
PVP01_0612600			22.815	3.33167	1.46718	2.2708	0.023159	0.0820636
PVP01_0528700			27.7116	1.89774	0.837004	2.2673	0.0233719	0.0827617
PVP01_0523900			2.69163	-3.01932	1.33238	-2.26611	0.0234444	0.0829618
PVP01_1029300			80.8202	-1.24428	0.54951	-2.26435	0.0235524	0.0832878
PVP01_0920600			166.76	1.26929	0.560675	2.26386	0.0235828	0.0833388
PVP01_1033300			5.5597	2.82755	1.25002	2.26201	0.0236968	0.0836487
PVP01_0833800			143.632	1.89388	0.837555	2.2612	0.0237468	0.0836487
PVP01_0833600			18.7183	1.77197	0.783585	2.26137	0.0237365	0.0836487
PVP01_1034400			885.138	-1.72977	0.765002	-2.26114	0.0237507	0.0836487
PVP01_0817800			39.7373	-2.37001	1.04793	-2.26162	0.0237211	0.0836487
PVP01_1344100			2.60814	5.06469	2.24177	2.25924	0.0238685	0.0839092
PVP01_0706900			16.3693	3.14255	1.39102	2.25917	0.0238729	0.0839092
PVP01_0521400			11.5537	2.27972	1.00901	2.25936	0.0238608	0.0839092
PVP01_1343300			13.0799	-2.61028	1.15555	-2.25891	0.0238891	0.0839093
PVP01_0119100			76.718	-2.10402	0.931899	-2.25778	0.0239595	0.0840436
PVP01_1136400			4.64348	-3.00061	1.32888	-2.25799	0.0239463	0.0840436
PVP01_1414500			23.6118	3.09564	1.37146	2.25718	0.0239966	0.0840854
PVP01_0211500			40.1163	-1.78107	0.789108	-2.25707	0.0240037	0.0840854
PVP01_1416900			40.845	3.23022	1.43161	2.25635	0.0240486	0.0840954
PVP01_0001090			10.0011	-2.6301	1.16569	-2.25627	0.0240539	0.0840954
PVP01_1235900			19.9881	-2.70238	1.19773	-2.25625	0.0240549	0.0840954
PVP01_0504700			35.9164	3.54733	1.57256	2.25577	0.0240852	0.0841449
PVP01_0527900			30.1296	-2.17748	0.965633	-2.25498	0.0241347	0.0842616
PVP01_0808100			82.5286	-2.07795	0.921656	-2.25458	0.0241598	0.0842926
PVP01_0929600			16.2863	2.78252	1.23526	2.25257	0.024286	0.0845972
PVP01_1433200			12.6921	-2.39434	1.06282	-2.25282	0.0242704	0.0845972
PVP01_1245600			25.379	-2.53535	1.12561	-2.25242	0.0242957	0.0845972
PVP01_1331500			31.6572	2.56627	1.13965	2.2518	0.0243349	0.0846771
PVP01_0306800			14.7269	-2.64944	1.1772	-2.25063	0.0244089	0.0848778
PVP01_1342200			132.116	1.15332	0.512646	2.24974	0.0244658	0.0850189
PVP01_0940900			56.6073	1.27307	0.566357	2.24782	0.0245879	0.0853866
PVP01_0311300			176.816	1.70521	0.758842	2.24713	0.0246319	0.0854824
PVP01_1002600			4.78694	-3.74889	1.66932	-2.24576	0.0247197	0.0857299
PVP01_1207100			188.924	-1.02737	0.457907	-2.24362	0.0248572	0.0861495
PVP01_1215200			7.58145	-2.54083	1.13296	-2.24266	0.0249189	0.0863061
PVP01_0416100			22.424	-1.59058	0.709336	-2.24235	0.0249387	0.0863174
PVP01_0009860			10.7649	-3.19601	1.42628	-2.2408	0.0250389	0.0866066
PVP01_1272500			34.7268	-2.56778	1.14624	-2.24018	0.0250792	0.0866886
PVP01_0726200			21.9866	-2.56752	1.14672	-2.23901	0.0251556	0.086895
PVP01_0508100			18.131	2.50566	1.11967	2.23786	0.0252303	0.0870947
PVP01_1408000			24.4004	-2.21264	0.988842	-2.23761	0.0252468	0.0870947
PVP01_1203300			363.311	-1.53551	0.686313	-2.23734	0.0252642	0.0870973
PVP01_1212200			251.195	1.99054	0.889812	2.23704	0.025284	0.0871079
PVP01_0716000			57.1847	-1.28371	0.574082	-2.2361	0.0253451	0.0872609
PVP01_0104300			159.41	3.03806	1.35961	2.23452	0.0254491	0.087561
PVP01_0836200			2.89857	3.48515	1.56039	2.23351	0.025515	0.0877299
PVP01_0005160			3.2768	5.43953	2.43714	2.23193	0.0256195	0.0877762
PVP01_0121700			3.2768	5.43953	2.43714	2.23193	0.0256195	0.0877762
PVP01_1303000			126.861	-1.08715	0.487123	-2.23178	0.0256294	0.0877762
PVP01_1108300			14.8823	-1.83687	0.822612	-2.23298	0.0255505	0.0877762
PVP01_1462900			21.6454	-2.54435	1.13993	-2.23202	0.0256138	0.0877762
PVP01_0933700			11.1071	-2.834	1.26928	-2.23276	0.0255647	0.0877762
PVP01_1220400			189.316	-1.03205	0.462534	-2.23129	0.0256617	0.0877946
PVP01_1127600			93.6853	-1.81572	0.813836	-2.23106	0.025677	0.0877946
PVP01_1103300			5.21179	-2.94321	1.31927	-2.23094	0.0256853	0.0877946
PVP01_0721700			32.9447	-1.70602	0.764831	-2.23059	0.0257082	0.0878153
PVP01_0010970			19.9473	3.818	1.71211	2.22999	0.0257479	0.0878358
PVP01_1213900			260.394	-0.938848	0.420974	-2.23018	0.0257356	0.0878358
PVP01_1219900			169.177	2.21928	0.995367	2.22961	0.0257735	0.0878526
PVP01_1208700			144.422	-1.47994	0.663824	-2.22941	0.0257865	0.0878526
PVP01_0906000			30.942	3.28084	1.47258	2.22795	0.0258839	0.0880121
PVP01_1033200			27.1932	2.43579	1.09309	2.22835	0.0258571	0.0880121
PVP01_1233900			23.1699	-1.88152	0.84445	-2.2281	0.0258735	0.0880121
PVP01_0733300			7.7651	2.31041	1.03821	2.22538	0.0260554	0.0884223
PVP01_API04800			1162.64	2.17293	0.976428	2.22539	0.0260549	0.0884223
PVP01_1105700			205.923	-1.13325	0.509212	-2.2255	0.0260478	0.0884223
PVP01_1130900			21.6643	-2.35982	1.06128	-2.22355	0.0261787	0.0887831
PVP01_1401900			44.0088	1.43782	0.647131	2.22183	0.0262947	0.0890028
PVP01_0409300			114.398	-1.12615	0.506839	-2.22191	0.0262897	0.0890028
PVP01_1261800			26.1314	-1.35582	0.610113	-2.22224	0.0262673	0.0890028
PVP01_0718300			74.2365	2.46299	1.10986	2.21919	0.0264739	0.089493
PVP01_0717400			235.186	1.57558	0.709976	2.21919	0.0264735	0.089493
PVP01_0731600			8.54287	2.18064	0.983661	2.21687	0.0266323	0.0898538
PVP01_1458700			32.3942	-1.79623	0.810158	-2.21713	0.0266139	0.0898538
PVP01_0008520			1.74105	-3.92117	1.76863	-2.21706	0.0266187	0.0898538
PVP01_1139100			134.101	1.10282	0.498226	2.21349	0.0268636	0.0905758
PVP01_0918100			41.6737	-1.72202	0.778718	-2.21135	0.0270116	0.0910159
PVP01_1105100			99.8105	-1.02431	0.463541	-2.20976	0.0271221	0.0912849
PVP01_1256600			102.555	-1.08529	0.491149	-2.20969	0.0271265	0.0912849
PVP01_1214700			12.4271	-2.72341	1.23344	-2.20799	0.0272453	0.0916257
PVP01_0308600			43.633	-1.74197	0.789355	-2.20683	0.0273262	0.0917952
PVP01_1457700			21.9777	-2.30855	1.04613	-2.20676	0.0273309	0.0917952
PVP01_0924900			132.456	1.12729	0.511232	2.20505	0.0274503	0.0921369
PVP01_1260000			414.985	-1.47355	0.668587	-2.20397	0.0275264	0.0923328
PVP01_0810300			132.5	-2.17222	0.98594	-2.20319	0.0275811	0.0924571
PVP01_1407600			68.7331	1.8439	0.837119	2.20268	0.0276176	0.0925199
PVP01_1456400			127.812	1.29058	0.586089	2.20202	0.0276638	0.0926153
PVP01_0715200			5.37273	-2.51015	1.14094	-2.20007	0.0278018	0.0930173
PVP01_1137500			60.3119	-1.9499	0.886662	-2.19914	0.0278678	0.0931784
PVP01_1427700			111.823	-1.10543	0.503479	-2.19559	0.0281216	0.0939068
PVP01_0717300			130.242	-1.11879	0.50953	-2.19572	0.0281118	0.0939068
PVP01_0906800			34.6281	-2.59991	1.1845	-2.19495	0.0281671	0.0939985
PVP01_1109000			27.4927	-2.34526	1.06944	-2.19299	0.0283084	0.0944097
PVP01_0724800			72.5155	1.75726	0.802019	2.19105	0.0284483	0.0948156
PVP01_0910800			5.9226	2.27166	1.03725	2.19008	0.0285182	0.0949273
PVP01_0105200			64.9163	1.08161	0.49386	2.19012	0.0285157	0.0949273
PVP01_0722500			81.9239	1.38316	0.631831	2.18913	0.0285876	0.0950974
PVP01_1231900			18.8759	2.02103	0.923361	2.18878	0.0286131	0.0951056
PVP01_1031600			3.37301	-4.80086	2.19358	-2.18859	0.0286265	0.0951056
PVP01_1122400			137.79	-2.27909	1.04245	-2.18628	0.0287951	0.0956049
PVP01_0711000			44.8244	2.10316	0.96236	2.18542	0.028858	0.095692
PVP01_0603600			29.0107	1.83178	0.838093	2.18565	0.0288411	0.095692
PVP01_1106500			10.8768	-2.37975	1.08924	-2.18478	0.0289047	0.095786
PVP01_1306000			52.9065	2.51034	1.14942	2.18401	0.0289615	0.0958169
PVP01_0513600			54.3234	1.93857	0.887661	2.18391	0.0289692	0.0958169
PVP01_1004200			12.1728	-2.49185	1.1409	-2.18411	0.0289544	0.0958169
PVP01_1256000			29.0503	1.87359	0.858198	2.18317	0.0290233	0.0959351
PVP01_1120400			53.5359	-2.61766	1.19984	-2.18167	0.0291341	0.0962404
PVP01_0510600			3.01332	-2.72188	1.24816	-2.18072	0.0292044	0.0964115
PVP01_1142400			157.04	-1.22295	0.56115	-2.17935	0.0293054	0.0966837
PVP01_0532600			232.667	1.43326	0.658103	2.17786	0.0294161	0.0969878
PVP01_0936100			19.6502	-2.41299	1.10834	-2.17713	0.0294711	0.0971076
PVP01_1208300			34.3733	-1.99258	0.915422	-2.17668	0.0295047	0.0971568
PVP01_1208200			5.93594	-3.10843	1.42894	-2.17533	0.0296053	0.0974266
PVP01_0717600			13.8999	4.1668	1.91966	2.1706	0.0299615	0.0985366
PVP01_1112200			59.6846	2.56015	1.18065	2.16843	0.030126	0.0989531
PVP01_0201200			392.069	-0.938563	0.432793	-2.16862	0.0301114	0.0989531
PVP01_1316100			794.885	0.901888	0.415992	2.16804	0.0301555	0.0989874
PVP01_0505900			7.55186	-2.39881	1.10755	-2.16588	0.0303206	0.0994667
PVP01_0831800			2.79821	3.4086	1.57431	2.16514	0.0303767	0.0995465
PVP01_1246400			27.037	-1.70956	0.789611	-2.16506	0.0303831	0.0995465
PVP01_0526800			294.419	1.09071	0.504003	2.1641	0.0304569	0.0996632
PVP01_1268500			20.7951	-2.2536	1.04125	-2.16433	0.0304392	0.0996632
PVP01_1018200			61.756	4.05645	1.87517	2.16325	0.0305222	0.0998143
PVP01_0510200			13.9319	-2.29338	1.06031	-2.16294	0.0305458	0.0998208
PVP01_1261300			34.0191	-2.56632	1.18675	-2.16247	0.0305816	0.0998208
PVP01_0523000			16.9209	-2.79603	1.29286	-2.16267	0.0305668	0.0998208
PVP01_0000090			35.0946	1.78323	0.824906	2.16174	0.030638	0.0999422
PVP01_1317800			37.6276	1.38994	0.64317	2.16108	0.0306889	0.0999822
PVP01_1434700			45.2346	-1.48785	0.68855	-2.16084	0.0307077	0.0999822
PVP01_0509900			54.5648	-1.52824	0.707189	-2.16101	0.0306949	0.0999822
PVP01_1332300			15.6838	3.28911	1.52354	2.15887	0.0308604	0.100417
PVP01_1110800			98.5537	-1.33969	0.620788	-2.15805	0.0309237	0.10056
PVP01_1201300			4.51946	4.30429	1.99554	2.15695	0.0310095	0.100713
PVP01_1227600			29.1202	-2.58918	1.20028	-2.15716	0.0309934	0.100713
PVP01_1119500			38.5281	4.29701	1.99251	2.15658	0.0310381	0.100743
PVP01_1419800			8.45717	2.28681	1.06115	2.15502	0.0311602	0.101077
PVP01_1131300			27.1667	-2.64727	1.2288	-2.15436	0.0312121	0.101182
PVP01_0208100			104.119	2.01524	0.935686	2.15375	0.0312594	0.101273
PVP01_1316600			6.08809	2.37183	1.1016	2.15308	0.0313128	0.101383
PVP01_0935600			39.7231	-2.49982	1.16149	-2.15225	0.0313774	0.101529
PVP01_0002140			1.56502	-3.7608	1.74764	-2.15193	0.0314026	0.101547
PVP01_0915600			28.5167	2.54651	1.18397	2.15081	0.0314909	0.101737
PVP01_0414900			34.0715	1.5726	0.731204	2.15069	0.0315003	0.101737
PVP01_0415000			209.939	-1.30185	0.605605	-2.14967	0.0315815	0.101936
PVP01_0534200			13.3801	3.15333	1.46762	2.1486	0.0316658	0.102019
PVP01_0920100			20.8289	-2.30767	1.07399	-2.14868	0.0316598	0.102019
PVP01_1454500			16.3417	-2.69687	1.25494	-2.14901	0.0316337	0.102019
PVP01_0938200			16.5487	1.55014	0.721722	2.14784	0.0317264	0.102151
PVP01_0811800			28.0905	-1.41876	0.660836	-2.14692	0.0317997	0.102324
PVP01_1249900			60.7829	-1.54713	0.721346	-2.14478	0.0319706	0.10281
PVP01_1030100			33.2297	-2.44502	1.14131	-2.14228	0.0321706	0.10339
PVP01_1467700			16.2896	-2.53773	1.1867	-2.13849	0.0324772	0.104311
PVP01_0529500			87.2662	1.76358	0.825137	2.13732	0.0325718	0.10455
PVP01_0935000			80.5643	-1.2777	0.598379	-2.13526	0.0327396	0.105025
PVP01_0007310			2.31899	-4.31276	2.02136	-2.1336	0.0328759	0.105397
PVP01_1023600			15.7369	-1.63246	0.765686	-2.13202	0.0330054	0.105747
PVP01_0205500			10.4461	-2.38696	1.11976	-2.13167	0.0330342	0.105774
PVP01_1438800			37.1597	2.13042	0.999529	2.13142	0.0330545	0.105774
PVP01_1258700			103.324	1.28543	0.603603	2.1296	0.033205	0.106191
PVP01_1343100			70.2699	1.28058	0.601532	2.12887	0.0332652	0.106318
PVP01_0734100			7.67265	2.43358	1.14342	2.12834	0.033309	0.106393
PVP01_0201500			180.376	0.941533	0.442598	2.12729	0.0333962	0.106534
PVP01_1134900			40.58	-1.36012	0.639434	-2.12707	0.0334144	0.106534
PVP01_1250700			23.3835	-1.90201	0.894103	-2.12728	0.0333965	0.106534
PVP01_1452600			47.6245	-2.56648	1.20855	-2.1236	0.0337034	0.10739
PVP01_1269900			7.96575	-2.96718	1.39964	-2.11997	0.0340089	0.108297
PVP01_1028800			13.0487	1.94694	0.919021	2.1185	0.0341329	0.108625
PVP01_0917700			48.7414	-1.63745	0.773191	-2.11778	0.0341934	0.108752
PVP01_1007800			36.3984	-1.3602	0.643049	-2.11524	0.0344093	0.109372
PVP01_1025100			84.7202	1.49874	0.708795	2.11449	0.0344738	0.10951
PVP01_0726100			42.4659	2.76854	1.31021	2.11305	0.0345964	0.109833
PVP01_1017100			358.64	-1.54074	0.729689	-2.11149	0.0347298	0.110122
PVP01_1030400			21.7328	-1.90863	0.903858	-2.11165	0.0347163	0.110122
PVP01_1103900			39.9356	-1.19107	0.564432	-2.11021	0.0348403	0.110405
PVP01_0407500			28.3497	1.93977	0.920106	2.1082	0.0350137	0.110753
PVP01_1322800			118.536	1.70767	0.809908	2.10848	0.0349896	0.110753
PVP01_1145400			29.0639	-1.38497	0.656926	-2.10826	0.0350082	0.110753
PVP01_0832600			19.6865	4.26132	2.02168	2.10781	0.0350477	0.110793
PVP01_1318800			56.3924	1.62019	0.769342	2.10594	0.0352097	0.111238
PVP01_0811100			5.59794	5.40249	2.56623	2.10522	0.0352718	0.111299
PVP01_0710700			30.5656	3.30607	1.57041	2.10523	0.0352712	0.111299
PVP01_0931400			59.0476	1.13372	0.538603	2.10492	0.0352982	0.111304
PVP01_0109100			499.625	-1.69046	0.803177	-2.10472	0.0353158	0.111304
PVP01_1145900			9.56301	-2.24898	1.06902	-2.10377	0.0353983	0.111496
PVP01_0215200			15.9526	-2.36222	1.12307	-2.10336	0.0354343	0.111542
PVP01_1322900			28.9616	2.86183	1.36107	2.10264	0.0354975	0.111674
PVP01_0005910			3.83052	-3.4088	1.62188	-2.10176	0.0355745	0.111848
PVP01_1028900			91.8542	-1.47166	0.701006	-2.09935	0.0357856	0.112445
PVP01_0115200			18.5675	6.19523	2.95358	2.09753	0.0359467	0.112882
PVP01_1147100			53.0405	1.51215	0.721761	2.09508	0.0361638	0.113496
PVP01_1261700			24.5216	-1.42124	0.6797	-2.09098	0.0365295	0.114575
PVP01_0010230			1.83912	4.4967	2.15322	2.08836	0.0367657	0.115112
PVP01_1319200			20.2104	2.04501	0.979363	2.0881	0.0367889	0.115112
PVP01_1214900			30.8961	1.47551	0.70657	2.08827	0.0367735	0.115112
PVP01_1458100			26.2486	-1.53199	0.733648	-2.08818	0.0367813	0.115112
PVP01_0831500			33.3888	2.58109	1.23719	2.08626	0.0369555	0.115494
PVP01_0104100			339.574	-1.66064	0.795916	-2.08645	0.0369375	0.115494
PVP01_1469900			91.7809	-1.06013	0.50828	-2.08572	0.0370036	0.115575
PVP01_1029700			5.40154	3.42085	1.64048	2.08528	0.037044	0.115632
PVP01_0907100			24.9212	-1.46645	0.703352	-2.08494	0.0370747	0.115659
PVP01_0514800			11.6664	2.40216	1.15273	2.08388	0.0371707	0.115889
PVP01_0307000			31.1035	3.11459	1.49565	2.08243	0.0373033	0.116233
PVP01_1323500			68.5686	1.47221	0.707804	2.07997	0.0375281	0.116864
PVP01_0213300			49.5957	-1.74666	0.839861	-2.0797	0.0375529	0.116871
PVP01_1260300			23.4645	3.16302	1.52128	2.07918	0.0376011	0.116902
PVP01_1401700			181.996	0.903136	0.434437	2.07887	0.0376297	0.116902
PVP01_0838300			109.244	-2.94619	1.41721	-2.07886	0.0376299	0.116902
PVP01_0929700			137.594	-1.37568	0.662048	-2.07791	0.0377174	0.117104
PVP01_0821500			40.0234	-1.07617	0.518054	-2.07733	0.0377709	0.1172
PVP01_0810700			56.3088	-1.51646	0.730211	-2.07674	0.0378259	0.117301
PVP01_1021800			44.409	-2.28295	1.09943	-2.07648	0.0378493	0.117304
PVP01_0612000			6.65251	4.25809	2.05208	2.07501	0.0379852	0.117528
PVP01_0607400			39.1607	-1.66247	0.801142	-2.07513	0.0379747	0.117528
PVP01_0616600			31.5703	-1.76277	0.84954	-2.07497	0.0379892	0.117528
PVP01_0000960			4.66431	6.00668	2.89626	2.07394	0.0380849	0.117754
PVP01_1408300			37.848	3.22238	1.55394	2.07368	0.0381089	0.117758
PVP01_0723000			27.4402	1.72406	0.831585	2.07322	0.0381519	0.117821
PVP01_1303800			12.4664	-2.15422	1.03959	-2.07218	0.038249	0.118051
PVP01_0118000			23.0302	-1.78737	0.862765	-2.07167	0.0382958	0.118126
PVP01_1264400			12.6598	1.4575	0.703639	2.07137	0.0383244	0.118144
PVP01_1121700			54.0482	-2.53333	1.22336	-2.0708	0.0383777	0.118239
PVP01_0529900			4.45982	3.32921	1.60983	2.06805	0.0386353	0.118855
PVP01_0909300			102.493	1.52853	0.739011	2.06834	0.0386078	0.118855
PVP01_1464300			20.5537	-2.21974	1.07341	-2.06793	0.0386462	0.118855
PVP01_0714200			10.8446	5.69043	2.7541	2.06616	0.038813	0.119298
PVP01_1231500			189.392	-1.49986	0.726132	-2.06555	0.0388714	0.119407
PVP01_0923900			54.5147	1.06675	0.516915	2.06369	0.0390468	0.119875
PVP01_0614200			38.6379	-1.70719	0.827452	-2.06319	0.0390944	0.11988
PVP01_1140600			20.6791	-2.35123	1.13956	-2.06328	0.0390863	0.11988
PVP01_1334400			80.4356	2.71669	1.31725	2.0624	0.0391697	0.120041
PVP01_1344300			76.0038	2.05935	0.999111	2.06119	0.0392851	0.120324
PVP01_0530100			16.1306	2.53392	1.22953	2.06088	0.0393149	0.120344
PVP01_0310200			116.692	1.23911	0.601504	2.06002	0.0393964	0.120452
PVP01_0711500			15.1979	-1.8967	0.920712	-2.06003	0.0393955	0.120452
PVP01_0424300			8.37264	-2.05328	0.99698	-2.0595	0.0394463	0.120534
PVP01_1143700			26.1649	1.20305	0.58426	2.05911	0.0394838	0.120578
PVP01_1013300			26.6567	-1.44222	0.700979	-2.05744	0.0396438	0.120996
PVP01_0112600			59.9164	-1.75894	0.855186	-2.05679	0.0397068	0.121117
PVP01_0530200			49.2768	2.21121	1.07527	2.05642	0.0397422	0.121154
PVP01_1419700			92.6802	-1.97901	0.963195	-2.05463	0.0399147	0.121609
PVP01_1334300			16.9899	-2.28528	1.11288	-2.05348	0.0400258	0.121876
PVP01_0419800			36.2657	1.09677	0.534467	2.05209	0.0401611	0.122217
PVP01_0814500			5.37304	-2.31648	1.12926	-2.05133	0.0402346	0.122369
PVP01_0830000			648.702	1.72601	0.841864	2.05023	0.0403424	0.122626
PVP01_0003380			4.48404	-5.16173	2.518	-2.04994	0.0403707	0.12264
PVP01_0931600			13.7798	2.91418	1.42205	2.04928	0.0404349	0.122764
PVP01_1248400			30.6948	1.93296	0.943475	2.04876	0.0404854	0.122846
PVP01_0732400			18.4962	1.86562	0.911148	2.04755	0.0406041	0.122974
PVP01_1221100			94.9112	-1.40317	0.685137	-2.04801	0.040559	0.122974
PVP01_0520600			22.0063	-1.4209	0.693969	-2.04749	0.0406099	0.122974
PVP01_1411600			10.226	-2.57605	1.25822	-2.04737	0.0406221	0.122974
PVP01_1250400			126.621	2.60342	1.27175	2.04712	0.0406467	0.122978
PVP01_0204100			138.013	2.38876	1.16752	2.04601	0.040755	0.123234
PVP01_0408100			65.2278	3.16062	1.54627	2.04402	0.0409512	0.123409
PVP01_0725500			54.0298	2.08242	1.01824	2.04512	0.0408431	0.123409
PVP01_0702100			87.37	1.90346	0.931353	2.04376	0.040977	0.123409
PVP01_0004280			302.797	1.09265	0.534526	2.04415	0.040939	0.123409
PVP01_1108100			88.197	-1.40938	0.689254	-2.04479	0.0408752	0.123409
PVP01_0702800			10.3959	-1.92986	0.944009	-2.04432	0.0409222	0.123409
PVP01_1462500			10.9536	-2.50701	1.22667	-2.04375	0.0409786	0.123409
PVP01_1253400			51.4889	-1.38449	0.678432	-2.04073	0.041278	0.124068
PVP01_1121800			186.711	-1.73785	0.851451	-2.04105	0.0412463	0.124068
PVP01_1231000			39.069	-2.37885	1.16548	-2.04109	0.0412417	0.124068
PVP01_0910600			3.23755	-3.26593	1.60049	-2.04058	0.0412925	0.124068
PVP01_0719400			24.7871	-1.50409	0.737586	-2.03921	0.0414287	0.124405
PVP01_0709000			74.319	1.43992	0.706924	2.03689	0.0416615	0.125032
PVP01_0809800			36.4238	-1.89254	0.929637	-2.03578	0.0417725	0.125293
PVP01_0419200			241.446	-1.26213	0.620063	-2.03549	0.0418019	0.12531
PVP01_0833300			26.5354	2.22905	1.09564	2.03447	0.0419046	0.125473
PVP01_1202700			20.258	-1.67548	0.8235	-2.03458	0.0418931	0.125473
PVP01_0416700			26.8795	1.8349	0.902247	2.0337	0.0419822	0.125558
PVP01_1224100			58.7608	-1.1523	0.566577	-2.0338	0.0419719	0.125558
PVP01_1241900			60.9593	-1.7884	0.879482	-2.03347	0.0420053	0.125558
PVP01_0623500			724.004	1.07598	0.52922	2.03314	0.0420384	0.125586
PVP01_1342300			32.4398	-2.44817	1.20445	-2.0326	0.0420933	0.125678
PVP01_0823600			58.5611	2.26079	1.11341	2.03051	0.0423043	0.126235
PVP01_1146600			3.82469	-2.67432	1.31782	-2.02936	0.0424221	0.126514
PVP01_0108100			46.6163	-1.6807	0.828384	-2.02889	0.04247	0.126585
PVP01_0511900			57.4869	1.85225	0.914426	2.02559	0.0428065	0.127376
PVP01_0204700			81.2402	1.66036	0.819652	2.02569	0.0427967	0.127376
PVP01_1336600			65.5581	-1.82514	0.901048	-2.02557	0.0428087	0.127376
PVP01_0302900			39.6488	2.60314	1.28636	2.02365	0.043006	0.127885
PVP01_0110200			25.1815	2.08456	1.0303	2.02326	0.0430468	0.127885
PVP01_0110400			83.0613	1.40933	0.696588	2.02319	0.0430534	0.127885
PVP01_0929400			16.6097	3.29686	1.63067	2.02179	0.0431983	0.12817
PVP01_0802700			20.6406	-1.69651	0.839068	-2.0219	0.0431871	0.12817
PVP01_0812200			13.0427	-2.32019	1.14789	-2.02127	0.0432519	0.128256
PVP01_1449600			55.9384	1.83869	0.91022	2.02005	0.0433781	0.128557
PVP01_0304100			3.3008	2.47325	1.22473	2.01942	0.0434439	0.128679
PVP01_1266300			23.1251	-2.34427	1.1614	-2.01849	0.0435405	0.128892
PVP01_1412400			24.4683	-2.37565	1.17761	-2.01734	0.0436595	0.129171
PVP01_0914700			104.64	2.07365	1.02856	2.01608	0.0437919	0.129342
PVP01_1450700			42.9683	1.84169	0.913408	2.01628	0.0437709	0.129342
PVP01_1462600			31.0949	-1.34526	0.667203	-2.01626	0.0437725	0.129342
PVP01_0804900			8.174	3.38456	1.67985	2.0148	0.0439256	0.129664
PVP01_0108600			32.7827	-1.95856	0.972491	-2.01396	0.0440136	0.129777
PVP01_1012400			15.7478	-2.71674	1.34881	-2.01417	0.0439917	0.129777
PVP01_1247300			73.4611	-1.10729	0.550184	-2.01258	0.0441585	0.130057
PVP01_1023000			45.6315	-1.66153	0.825548	-2.01264	0.0441527	0.130057
PVP01_0934200			1.78894	4.44963	2.21315	2.01054	0.0443737	0.130617
PVP01_0733100			29.6436	1.46224	0.728161	2.00814	0.0446289	0.131279
PVP01_0907200			4.63787	-2.99004	1.4891	-2.00795	0.0446489	0.131279
PVP01_0117100			129.436	1.77726	0.885372	2.00736	0.0447119	0.131316
PVP01_0925400			17.5535	-1.94684	0.969757	-2.00755	0.0446908	0.131316
PVP01_0904700			12.1553	-2.21743	1.10486	-2.00699	0.0447507	0.131356
PVP01_0214800			88.1592	1.85738	0.927395	2.00279	0.0451993	0.132598
PVP01_1328400			136.299	0.850877	0.424938	2.00236	0.0452464	0.132662
PVP01_0415800			816.617	2.53216	1.26509	2.00156	0.0453324	0.132839
PVP01_1008500			8.98794	5.41644	2.70673	2.0011	0.0453817	0.132909
PVP01_0931800			13.6112	-1.63243	0.817217	-1.99755	0.0457654	0.133958
PVP01_1131100			15.8579	-1.6038	0.803458	-1.99612	0.045921	0.134338
PVP01_1453300			47.4749	1.63653	0.820601	1.99431	0.0461187	0.13484
PVP01_0805700			6.88116	3.93062	1.97142	1.9938	0.0461741	0.134927
PVP01_1443600			12.7469	2.29365	1.15069	1.99329	0.0462299	0.134938
PVP01_1130700			36.0002	-1.22805	0.616092	-1.9933	0.0462291	0.134938
PVP01_1021400			27.5283	1.41882	0.712631	1.99096	0.0464857	0.135609
PVP01_1407200			17.0322	-2.39607	1.20368	-1.99062	0.0465231	0.135643
PVP01_0525300			11.1514	-2.19952	1.1056	-1.98944	0.0466532	0.13587
PVP01_0105400			29.9625	-2.22947	1.12053	-1.98966	0.0466284	0.13587
PVP01_0808500			74.9569	-1.32508	0.666752	-1.98736	0.0468824	0.136461
PVP01_0508200			1703.03	-0.8913	0.44856	-1.98702	0.0469198	0.136494
PVP01_1229200			182.081	1.74444	0.87819	1.98641	0.046988	0.136602
PVP01_0204200			7.83226	-2.33273	1.17446	-1.98622	0.0470091	0.136602
PVP01_0010030			11.2279	1.94053	0.97752	1.98515	0.0471274	0.136869
PVP01_0530500			4.54738	3.80762	1.91852	1.98466	0.0471819	0.136951
PVP01_1249300			18.5275	-2.15405	1.08571	-1.984	0.0472562	0.13709
PVP01_1420500			108.139	2.68241	1.35227	1.98364	0.0472964	0.137131
PVP01_1317400			33.9366	-1.17464	0.592297	-1.9832	0.047345	0.137195
PVP01_1269200			16.1032	-2.07806	1.04837	-1.98217	0.0474599	0.137452
PVP01_0005450			5.26726	4.20007	2.11988	1.98128	0.0475598	0.137529
PVP01_0212000			65.1347	1.10653	0.558506	1.98123	0.0475658	0.137529
PVP01_0945600			20.42	-2.09666	1.05816	-1.98142	0.0475442	0.137529
PVP01_0723500			7.92463	2.60598	1.31621	1.97992	0.0477129	0.137878
PVP01_1323900			12.7482	2.88061	1.45529	1.97941	0.0477704	0.137968
PVP01_0703700			613.008	2.81687	1.42384	1.97837	0.0478874	0.138229
PVP01_1460000			15.8233	-2.43398	1.23072	-1.97768	0.0479649	0.138377
PVP01_0831700			46.1568	-1.05381	0.533104	-1.97675	0.0480702	0.138604
PVP01_0728800			75.0204	2.68397	1.35899	1.97498	0.048271	0.139106
PVP01_0901200			8.3356	5.30647	2.68739	1.97458	0.0483158	0.139158
PVP01_1448400			58.3205	1.10311	0.55964	1.9711	0.0487122	0.140222
PVP01_0619400			4.88478	3.68142	1.8697	1.96899	0.0489546	0.140842
PVP01_0506500			225.717	-1.43508	0.728969	-1.96864	0.0489941	0.140878
PVP01_0313100			37.0558	-1.37101	0.696624	-1.96808	0.0490588	0.140987
PVP01_0518700			167.325	-1.60018	0.813566	-1.96688	0.0491974	0.141307
PVP01_0910400			2.80451	-2.59245	1.31836	-1.96641	0.049251	0.141383
PVP01_1004800			42.9828	-2.40702	1.22425	-1.96611	0.0492858	0.141405
PVP01_0521500			46.6606	-1.72436	0.877337	-1.96545	0.0493624	0.141547
PVP01_1017000			209.968	-1.73435	0.883074	-1.96399	0.0495312	0.141953
PVP01_1032700			13.604	4.12701	2.10226	1.96313	0.0496316	0.142163
PVP01_1238500			21.6709	1.34899	0.687491	1.96219	0.0497404	0.142396
PVP01_1245700			14.7216	1.8519	0.945606	1.95843	0.0501797	0.143575
PVP01_0905300			42.0908	3.3816	1.72829	1.95662	0.0503926	0.143947
PVP01_0931900			26.9482	2.02684	1.03564	1.95708	0.0503382	0.143947
PVP01_1339200			26.8158	-2.18958	1.11894	-1.95684	0.0503667	0.143947
PVP01_1445300			34.8213	-1.20593	0.61678	-1.9552	0.0505596	0.144345
PVP01_1323200			189.011	-1.16706	0.597082	-1.9546	0.0506305	0.144469
PVP01_1459700			17.2676	-2.23895	1.14574	-1.95416	0.050682	0.144537
PVP01_0109900			39.4208	-1.5449	0.790736	-1.95375	0.0507313	0.144598
PVP01_0801700			222.959	1.06074	0.543307	1.95237	0.0508939	0.144982
PVP01_0523500			9.18385	2.03185	1.04096	1.95189	0.0509511	0.145066
PVP01_0419400			19.6037	-2.27357	1.16502	-1.95153	0.0509945	0.14511
PVP01_1420700			4.86859	5.11431	2.62159	1.95085	0.0510754	0.145182
PVP01_0722200			13.1994	4.04688	2.07431	1.95095	0.0510629	0.145182
PVP01_0310100			42.2537	1.92858	0.988739	1.95055	0.051111	0.145204
PVP01_0202600			80.738	2.02839	1.0402	1.95001	0.0511746	0.145306
PVP01_1139300			62.4256	1.53236	0.786021	1.94951	0.0512341	0.145395
PVP01_1432900			78.3678	-1.85029	0.949239	-1.94924	0.0512671	0.14541
PVP01_0516900			13.7868	-1.59316	0.817661	-1.94844	0.0513626	0.145602
PVP01_1237600			12.5996	2.84571	1.46143	1.9472	0.0515103	0.145849
PVP01_0611200			177.482	1.65983	0.852604	1.94677	0.0515618	0.145849
PVP01_1254000			36.6469	-1.68394	0.864966	-1.94683	0.0515555	0.145849
PVP01_0512800			8.31747	-2.20802	1.13383	-1.9474	0.0514871	0.145849
PVP01_0703500			137.985	-2.10991	1.08414	-1.94616	0.0516358	0.14598
PVP01_1341900			76.8814	3.54409	1.82229	1.94485	0.0517932	0.146345
PVP01_1228300			51.152	3.27317	1.68418	1.94347	0.0519589	0.146713
PVP01_1410200			54.1785	1.29616	0.666988	1.9433	0.0519794	0.146713
PVP01_1128400			36.8931	3.04727	1.56847	1.94283	0.0520368	0.146757
PVP01_1207300			425.674	-1.14357	0.588646	-1.94271	0.0520515	0.146757
PVP01_0621400			31.1684	1.68555	0.868006	1.94187	0.0521528	0.146884
PVP01_1115700			17.8977	-2.20351	1.13464	-1.94203	0.052134	0.146884
PVP01_1011900			3.07891	-2.77116	1.42922	-1.93893	0.0525095	0.147809
PVP01_0118800			2.06777	3.54745	1.83006	1.93843	0.0525711	0.147902
PVP01_0907700			16.0554	3.18555	1.64452	1.93707	0.0527367	0.147969
PVP01_1457900			313.293	2.34113	1.20827	1.9376	0.0526723	0.147969
PVP01_0945100			79.1754	1.09511	0.565269	1.93733	0.0527052	0.147969
PVP01_1005900			16.9459	-2.13786	1.10358	-1.9372	0.0527209	0.147969
PVP01_1018000			40.4858	-2.40482	1.24092	-1.93794	0.0526311	0.147969
PVP01_1204800			7.43235	5.13905	2.65694	1.9342	0.0530889	0.148877
PVP01_1203100			9.02329	2.55746	1.3226	1.93366	0.0531545	0.148981
PVP01_0317200			78.6822	1.89655	0.981559	1.93218	0.0533374	0.149405
PVP01_0308800			13.5547	-1.90984	0.988548	-1.93197	0.0533632	0.149405
PVP01_1117000			6.02809	3.73147	1.93248	1.93092	0.0534929	0.149688
PVP01_1315900			5.8246	-2.63481	1.36515	-1.93005	0.0536003	0.149908
PVP01_1419200			41.2875	3.10142	1.60919	1.92732	0.0539395	0.150776
PVP01_0419700			48.2882	-1.27805	0.663345	-1.92667	0.0540208	0.150785
PVP01_0701900			48.1817	-1.41206	0.732927	-1.9266	0.0540295	0.150785
PVP01_1440300			3.63751	-2.31477	1.20126	-1.92694	0.0539868	0.150785
PVP01_1266000			26.5194	1.75961	0.913917	1.92534	0.0541864	0.150922
PVP01_1116700			21.8298	1.38278	0.718241	1.92523	0.0542003	0.150922
PVP01_0819200			61.0982	-1.14665	0.59565	-1.92505	0.0542233	0.150922
PVP01_0837800			27.8522	-2.30692	1.19823	-1.92528	0.0541943	0.150922
PVP01_0009050			4.818	-2.52005	1.30885	-1.92539	0.0541801	0.150922
PVP01_1132900			46.3434	1.13144	0.587893	1.92457	0.0542831	0.151008
PVP01_1266200			36.8607	-1.4518	0.75507	-1.92273	0.0545135	0.151568
PVP01_0730800			73.0457	1.07428	0.558826	1.92238	0.0545578	0.151611
PVP01_1417300			11.191	5.45673	2.84	1.92138	0.0546839	0.151799
PVP01_1212800			413.313	-1.63307	0.849846	-1.9216	0.0546557	0.151799
PVP01_1126700			252.516	-1.0723	0.558203	-1.92099	0.0547335	0.151856
PVP01_1420600			12.1158	2.31008	1.20321	1.91994	0.0548653	0.151922
PVP01_0206400			54.1709	1.40512	0.731883	1.91988	0.0548736	0.151922
PVP01_0927600			24.2413	-1.17875	0.613942	-1.91997	0.0548612	0.151922
PVP01_1253600			91.8401	-1.88553	0.98196	-1.92017	0.0548366	0.151922
PVP01_0809700			4.40131	2.66327	1.38744	1.91955	0.0549143	0.151954
PVP01_1460600			6.04247	2.30736	1.20223	1.91923	0.0549557	0.151987
PVP01_1441300			58.8828	2.17124	1.13144	1.919	0.0549846	0.151987
PVP01_1339400			53.1861	-1.37342	0.715854	-1.91857	0.0550383	0.152055
PVP01_1309800			21.0332	-2.12913	1.11089	-1.91661	0.0552879	0.152664
PVP01_0732000			22.7008	2.17426	1.13544	1.9149	0.0555048	0.153181
PVP01_1441500			47.1623	1.2089	0.631645	1.91389	0.0556336	0.153456
PVP01_0111600			46.1258	1.56687	0.818791	1.91364	0.0556668	0.153466
PVP01_0007660			3.12626	5.39539	2.82194	1.91195	0.0558831	0.153952
PVP01_1106100			116.465	-0.950137	0.496986	-1.9118	0.0559019	0.153952
PVP01_0534400			3.53834	-4.82077	2.52483	-1.90935	0.0562173	0.154739
PVP01_0110300			52.8489	1.7598	0.922566	1.9075	0.0564556	0.155231
PVP01_0519700			109.8	-1.47426	0.772783	-1.90773	0.0564267	0.155231
PVP01_1212900			23.7947	-1.40291	0.736176	-1.90567	0.0566935	0.15572
PVP01_0005840			2.85208	-4.55182	2.38838	-1.90582	0.0566737	0.15572
PVP01_0800400			32.3115	1.55021	0.813941	1.90458	0.0568351	0.155913
PVP01_0208400			15.8352	-1.59351	0.836735	-1.90444	0.0568534	0.155913
PVP01_0727900			79.4941	-2.67766	1.40585	-1.90465	0.0568261	0.155913
PVP01_1138400			90.3416	-1.57347	0.826314	-1.9042	0.0568841	0.155916
PVP01_1464200			16.0956	-1.50113	0.788938	-1.90272	0.0570766	0.156361
PVP01_0405500			15.2956	-1.75331	0.921686	-1.90228	0.0571346	0.156438
PVP01_1126200			23.9471	1.36761	0.719811	1.89996	0.0574389	0.157189
PVP01_0936900			149.115	1.79435	0.944697	1.89939	0.0575136	0.15731
PVP01_1447000			199.275	0.97598	0.514087	1.89847	0.057634	0.157474
PVP01_1256800			8.88949	-2.484	1.30829	-1.89865	0.0576099	0.157474
PVP01_0941200			62.6314	2.46989	1.30114	1.89824	0.0576642	0.157475
PVP01_1026100			17.0899	1.31844	0.694669	1.89793	0.0577047	0.157503
PVP01_0528000			10.4249	1.73993	0.917484	1.89642	0.0579048	0.157966
PVP01_0510900			44.2191	3.55948	1.87719	1.89617	0.057937	0.157971
PVP01_0421500			18.9576	1.78041	0.939404	1.89525	0.058059	0.158221
PVP01_1255500			7.16837	-2.36541	1.24981	-1.89262	0.0584086	0.159091
PVP01_0527000			55.7156	3.00004	1.58575	1.89188	0.0585069	0.159192
PVP01_0835500			3.62043	-2.30173	1.21656	-1.89199	0.058492	0.159192
PVP01_1230600			79.3586	-1.0781	0.569931	-1.89162	0.058541	0.159202
PVP01_1120900			10.6996	-2.3245	1.22938	-1.89079	0.058652	0.159421
PVP01_0823100			66.9041	-1.35941	0.719142	-1.89033	0.0587143	0.159425
PVP01_0924500			29.9444	-1.6748	0.885988	-1.89032	0.0587147	0.159425
PVP01_1345700			56.7099	3.06492	1.62177	1.88987	0.0587757	0.159477
PVP01_0531600			4.8143	-2.15284	1.13923	-1.88972	0.0587949	0.159477
PVP01_0834800			14.5487	-2.06952	1.09709	-1.88637	0.0592448	0.160614
PVP01_1203000			95.5222	-1.53894	0.815964	-1.88604	0.0592898	0.160652
PVP01_1423500			10.2641	2.63286	1.39644	1.88541	0.0593748	0.160799
PVP01_0505400			42.7656	-0.99589	0.528346	-1.88492	0.0594406	0.160894
PVP01_0806600			14.7893	1.99626	1.05995	1.88335	0.0596524	0.161235
PVP01_1231300			50.6727	-1.1107	0.589833	-1.88308	0.0596901	0.161235
PVP01_1326000			36.2045	-1.20508	0.639952	-1.88307	0.0596903	0.161235
PVP01_1414100			16.5572	-1.37939	0.732447	-1.88327	0.0596641	0.161235
PVP01_0946800			23.5374	2.19385	1.16534	1.88258	0.0597568	0.161331
PVP01_0800800			15.6274	-1.7275	0.918393	-1.881	0.0599714	0.161827
PVP01_1444400			170.501	-1.02731	0.546563	-1.87958	0.0601658	0.162267
PVP01_0710800			51.9011	-1.17436	0.624976	-1.87904	0.060239	0.162381
PVP01_0313500			82.7469	-1.69421	0.902085	-1.87811	0.0603662	0.16264
PVP01_0937900			3760.42	1.23415	0.657761	1.87629	0.0606152	0.163226
PVP01_1345200			9.39583	3.85232	2.05375	1.87575	0.0606902	0.16326
PVP01_0717200			25.2152	-1.60179	0.853916	-1.87581	0.0606808	0.16326
PVP01_1447200			190.621	1.03797	0.553668	1.87471	0.0608319	0.163556
PVP01_1450900			25.278	-2.0645	1.10153	-1.87421	0.0609022	0.163661
PVP01_0315300			282.968	-1.48391	0.792042	-1.87352	0.0609967	0.163759
PVP01_0804500			3.41005	-4.76427	2.543	-1.87348	0.0610015	0.163759
PVP01_1239900			77.263	1.10976	0.592507	1.873	0.0610691	0.163772
PVP01_1122800			38.0245	-1.32651	0.708187	-1.8731	0.0610544	0.163772
PVP01_1317600			42.3532	2.98311	1.59365	1.87187	0.0612246	0.164105
PVP01_1335200			9.73495	1.38729	0.741284	1.87148	0.0612792	0.164166
PVP01_0004250			30.5275	1.99134	1.06475	1.87024	0.061451	0.164374
PVP01_0911400			8.29553	1.52532	0.815473	1.87047	0.0614181	0.164374
PVP01_1206900			52.0329	-1.93545	1.03476	-1.87043	0.0614239	0.164374
PVP01_1460500			2.69298	3.1119	1.6642	1.86991	0.0614964	0.164411
PVP01_1005300			11.7822	3.98774	2.13321	1.86936	0.0615729	0.164531
PVP01_0519500			104.466	1.23575	0.661552	1.86795	0.0617691	0.164886
PVP01_0720300			15.6331	-2.14516	1.1484	-1.86795	0.061769	0.164886
PVP01_1141700			9.89496	3.09905	1.66005	1.86685	0.0619226	0.165211
PVP01_1124400			16.6712	5.47512	2.93399	1.8661	0.0620278	0.165405
PVP01_1029400			9.58524	5.2301	2.80302	1.86588	0.0620585	0.165405
PVP01_1223800			22.1827	1.67815	0.89964	1.86536	0.0621309	0.165482
PVP01_1264500			40.9024	-2.53492	1.35905	-1.86522	0.0621509	0.165482
PVP01_1340100			7.11882	-2.19707	1.17812	-1.8649	0.0621957	0.165517
PVP01_1254500			12.0037	-1.9847	1.06559	-1.86254	0.0625272	0.166314
PVP01_1234500			25.5306	-2.06108	1.10713	-1.86165	0.0626528	0.166563
PVP01_0801000			410.726	1.02434	0.550538	1.86061	0.0627997	0.166784
PVP01_1136200			96.6219	-1.2919	0.694298	-1.86073	0.0627818	0.166784
PVP01_0320200			45.0082	1.7295	0.929882	1.85991	0.062898	0.166942
PVP01_0001180			2.48462	-3.44554	1.85287	-1.85957	0.062947	0.166942
PVP01_0523200			3.7373	-4.86516	2.61637	-1.85951	0.0629554	0.166942
PVP01_1309500			24.5694	-2.04093	1.09798	-1.8588	0.0630552	0.167122
PVP01_0827300			5.6473	-2.07039	1.1142	-1.85819	0.0631424	0.167268
PVP01_0413800			8.4902	-2.4423	1.31455	-1.8579	0.0631835	0.167292
PVP01_1020900			40.0041	2.82442	1.52097	1.85698	0.0633143	0.167326
PVP01_1258500			127.953	0.929179	0.500387	1.85692	0.0633224	0.167326
PVP01_0312600			211.498	-1.20604	0.649491	-1.8569	0.0633248	0.167326
PVP01_1108500			29.1356	-1.27103	0.684433	-1.85705	0.0633034	0.167326
PVP01_0617900			35.486	-1.34848	0.726572	-1.85595	0.0634602	0.167599
PVP01_1433800			9.30938	1.86249	1.00385	1.85535	0.0635466	0.167742
PVP01_0110100			86.8507	1.00576	0.542403	1.85427	0.0637009	0.168065
PVP01_0912200			10.7407	-1.99722	1.07786	-1.85294	0.0638908	0.16848
PVP01_1205800			6.65471	3.13984	1.69476	1.85267	0.0639294	0.168497
PVP01_0609300			17.8806	2.48473	1.34219	1.85125	0.0641333	0.168779
PVP01_1463700			38.9088	2.11173	1.14069	1.85127	0.0641312	0.168779
PVP01_0212600			59.0616	-1.26384	0.682596	-1.85153	0.0640939	0.168779
PVP01_1344600			17.6892	2.59445	1.40178	1.85082	0.064195	0.168856
PVP01_1206000			189.827	2.37118	1.2815	1.85031	0.064269	0.168965
PVP01_1405700			29.5905	2.84082	1.5357	1.84985	0.0643351	0.169054
PVP01_0712400			25.7123	-2.30136	1.24441	-1.84936	0.0644062	0.169156
PVP01_0730900			57.6257	1.41345	0.764649	1.8485	0.0645307	0.169397
PVP01_1233100			45.1034	2.79536	1.51248	1.8482	0.0645739	0.169425
PVP01_0909600			9.42969	1.66033	0.899291	1.84626	0.0648541	0.170075
PVP01_0939900			174.598	1.02568	0.555667	1.84585	0.0649137	0.170146
PVP01_0929800			1098.19	0.670779	0.363496	1.84535	0.0649859	0.170249
PVP01_1214300			25.7171	3.42333	1.85635	1.84411	0.0651666	0.170637
PVP01_1343600			9.49717	-2.18232	1.18361	-1.84378	0.0652145	0.170677
PVP01_0409100			6.57363	6.58104	3.57027	1.84329	0.0652872	0.170781
PVP01_1208100			53.1135	1.79994	0.976955	1.8424	0.0654163	0.170948
PVP01_0411400			30.6624	1.38277	0.750513	1.84243	0.0654122	0.170948
PVP01_0514500			128.593	3.35182	1.81992	1.84174	0.0655128	0.171028
PVP01_0319800			108.067	1.30906	0.710741	1.84182	0.0655011	0.171028
PVP01_0212100			231.647	-0.884794	0.480503	-1.84139	0.0655644	0.171077
[truncated: 3,770 more rows]

## Sheet: 1vs4
Gene ID	Gene Name	Product Description	baseMean	log2FoldChange	lfcSE	stat	pvalue	padj
PVP01_1220200	MSP-7C	MSP7-like protein	15.3383	-6.33406	1.76676	-3.58513	0.000336906	0.010973
PVP01_1219700	MSP-7H	MSP7-like protein	157.378	-5.31189	1.67585	-3.16967	0.00152611	0.0321647
PVP01_1033900	TRAG18	tryptophan-rich protein	2472.31	7.47418	1.16202	6.43208	1.25868e-10	2.9258e-07
PVP01_1201400		Plasmodium exported protein (PHIST), unknown function	1092.23	13.4653	2.07714	6.4826	9.01562e-11	2.9258e-07
PVP01_1470200		Plasmodium exported protein, unknown function	1154.76	11.6495	1.9976	5.83172	5.48588e-09	8.50129e-06
PVP01_0533700		Plasmodium exported protein (PHIST), unknown function	481.395	12.2636	2.17723	5.63267	1.77443e-08	2.06233e-05
PVP01_1147800		Plasmodium exported protein, unknown function	228.848	11.2246	2.01277	5.57667	2.45173e-08	2.0749e-05
PVP01_0001440		Plasmodium exported protein (PHIST), unknown function	695.217	6.79265	1.22142	5.56129	2.67786e-08	2.0749e-05
PVP01_0004240	RBSA	reticulocyte binding surface protein RBSA	166.643	9.24897	1.70435	5.42669	5.74078e-08	2.96543e-05
PVP01_0004260		hypothetical protein	189.143	10.9475	2.01507	5.43283	5.54671e-08	2.96543e-05
PVP01_0422800		Plasmodium exported protein (PHIST), unknown function	3537.41	7.87524	1.44178	5.46218	4.70323e-08	2.96543e-05
PVP01_0620400		hypothetical protein	300.23	-8.96197	1.65944	-5.40059	6.64239e-08	3.08804e-05
PVP01_0000120	TRAG27	tryptophan-rich protein	415.027	8.85273	1.64558	5.37971	7.46059e-08	3.15312e-05
PVP01_0102600	SEMP1	small exported membrane protein 1, putative	156.465	9.15315	1.71149	5.34805	8.89052e-08	3.44434e-05
PVP01_0624000		Plasmodium exported protein, unknown function	144.545	9.04399	1.69638	5.33135	9.74849e-08	3.48621e-05
PVP01_0503800		Plasmodium exported protein (PHIST), unknown function	1702.58	9.02264	1.69916	5.31005	1.09597e-07	3.63941e-05
PVP01_1034000		Plasmodium exported protein (PHIST), unknown function	139.311	8.99064	1.7065	5.26845	1.37578e-07	4.08942e-05
PVP01_0202000		hypothetical protein	372.446	7.3036	1.38739	5.26428	1.40742e-07	4.08942e-05
PVP01_0119200	CVC-81-95	Plasmodium exported protein (PHISTc), unknown function	4472.9	5.96965	1.14215	5.22666	1.726e-07	4.72012e-05
PVP01_0948800	TRAG16	tryptophan-rich protein	588.591	8.57931	1.64993	5.19981	1.99496e-07	4.90441e-05
PVP01_0623500		Plasmodium exported protein, unknown function	530.677	6.3985	1.23073	5.19893	2.00438e-07	4.90441e-05
PVP01_0004280		Plasmodium exported protein, unknown function	222.025	8.52829	1.64879	5.17245	2.3105e-07	5.37077e-05
PVP01_1147500		Plasmodium exported protein, unknown function	709.434	8.41284	1.6324	5.15366	2.55449e-07	5.65515e-05
PVP01_0516100		Plasmodium exported protein (PHIST), unknown function	113.893	8.69307	1.71729	5.0621	4.14662e-07	8.61101e-05
PVP01_0734300		conserved Plasmodium protein, unknown function	1564.93	6.68488	1.32192	5.05695	4.26012e-07	8.61101e-05
PVP01_0000130	TRAG28	tryptophan-rich protein	1005.95	6.01275	1.19486	5.03219	4.84913e-07	9.01744e-05
PVP01_0801000		hypothetical protein	294.132	6.81328	1.35259	5.03722	4.72334e-07	9.01744e-05
PVP01_0814200	MSA180	merozoite surface protein MSA180	887.394	-7.25431	1.44637	-5.01551	5.28927e-07	9.45762e-05
PVP01_0734900		Plasmodium exported protein (PHIST), unknown function	96.6177	8.46304	1.69984	4.97872	6.40073e-07	0.000110211
PVP01_0601000		Plasmodium exported protein, unknown function	239.173	8.17855	1.64929	4.95882	7.09211e-07	0.000113694
PVP01_0417600		serine-repeat antigen 5 (SERA)	462.623	-7.4143	1.4941	-4.96237	6.96382e-07	0.000113694
PVP01_0404300		Plasmodium exported protein, unknown function	165.942	8.10782	1.65033	4.91284	8.97683e-07	0.000139111
PVP01_1402000		hypothetical protein	81.3086	8.21155	1.68693	4.86775	1.12875e-06	0.000169276
PVP01_1402300		Plasmodium exported protein, unknown function	82.824	9.7571	2.01151	4.85063	1.23071e-06	0.0001788
PVP01_0948700	TRAG15	tryptophan-rich protein	1268.7	5.67432	1.17147	4.84374	1.27415e-06	0.000179501
PVP01_0000160	TRAG31	tryptophan-rich protein	1008.02	5.7512	1.19054	4.83074	1.36026e-06	0.000185996
PVP01_1402700		Plasmodium exported protein, unknown function	327.439	6.50279	1.3483	4.82295	1.41451e-06	0.000187887
PVP01_0623900		ring-exported protein 4, putative	92.6364	9.91191	2.06968	4.78909	1.67538e-06	0.000216357
PVP01_0423300		hypothetical protein	192.777	8.00865	1.681	4.7642	1.89603e-06	0.000238233
PVP01_0102700		conserved Plasmodium protein, unknown function	142.455	7.88621	1.65856	4.75486	1.98585e-06	0.000242953
PVP01_0601900		Plasmodium exported protein (PHIST), unknown function	253.85	8.41945	1.77279	4.74927	2.0415e-06	0.000243358
PVP01_1470100	TRAG24	tryptophan-rich protein	74.0761	9.59483	2.04364	4.69496	2.6666e-06	0.000304055
PVP01_1101700		conserved Plasmodium protein, unknown function	766.808	6.03525	1.28579	4.69382	2.6815e-06	0.000304055
PVP01_1033600	SBP1	skeleton-binding protein 1, putative	1555.35	5.64994	1.20694	4.6812	2.85198e-06	0.000315687
PVP01_0503600	TRAG38	tryptophan-rich protein	184.827	7.95271	1.70379	4.66765	3.04659e-06	0.000329387
PVP01_0000220		Plasmodium exported protein, unknown function	112.565	10.1678	2.19587	4.63043	3.64911e-06	0.000375584
PVP01_0900700		PIR protein	76.4698	9.63427	2.0808	4.63008	3.65516e-06	0.000375584
PVP01_0404800		Plasmodium exported protein, unknown function	60.7873	9.31317	2.01294	4.62665	3.71626e-06	0.000375584
PVP01_1401000		Plasmodium exported protein, unknown function	64.7046	9.39937	2.05014	4.58475	4.5454e-06	0.000449608
PVP01_0523400		Plasmodium exported protein (PHIST), unknown function	219.373	7.72675	1.6878	4.57801	4.6942e-06	0.000454653
PVP01_1402500		conserved Plasmodium protein, unknown function	59.0704	9.27116	2.02948	4.56824	4.91848e-06	0.000466653
PVP01_0727900	RhopH2	high molecular weight rhoptry protein 2	535.863	-5.81124	1.27382	-4.56205	5.06572e-06	0.000471011
PVP01_0829800	PIESP1	parasite-infected erythrocyte surface protein, putative	262.075	-5.97426	1.31752	-4.53448	5.77452e-06	0.000526387
PVP01_0724400		conserved Plasmodium protein, unknown function	338.34	5.43679	1.20203	4.52303	6.09615e-06	0.000545019
PVP01_0838000		Plasmodium exported protein, unknown function	62.3554	9.34294	2.07086	4.51162	6.43348e-06	0.000564325
PVP01_0532900	TRAG11	tryptophan-rich protein	301.506	5.40871	1.20201	4.49971	6.80476e-06	0.00058584
PVP01_0000210		tryptophan-rich protein	48.5849	8.98609	2.01589	4.45763	8.28703e-06	0.00070048
PVP01_0838600		PIR protein	68.1466	9.4608	2.12487	4.45242	8.49095e-06	0.0007049
PVP01_0202200	TRAG2	tryptophan-rich protein	378.502	5.28646	1.19149	4.43685	9.12836e-06	0.000731685
PVP01_1470500		Plasmodium exported protein, unknown function	51.471	7.54599	1.69978	4.43938	9.02165e-06	0.000731685
PVP01_1470300		Plasmodium exported protein (PHIST), unknown function	46.0361	8.91238	2.01612	4.42056	9.84475e-06	0.000775733
PVP01_1470400		Plasmodium exported protein, unknown function	45.2042	8.88585	2.01538	4.40902	1.0384e-05	0.000804585
PVP01_0423500	KAHRP	knob-associated histidine-rich protein, putative	85.8228	-9.72429	2.20936	-4.40141	1.07547e-05	0.000819652
PVP01_1271500		lysophospholipase, putative	69.2333	7.28478	1.65929	4.3903	1.13192e-05	0.000848758
PVP01_0417200		serine-repeat antigen 5 (SERA)	286.354	-7.31454	1.66978	-4.38055	1.18381e-05	0.000873573
PVP01_0422700		gamete antigen 27/25, putative	101.521	7.22418	1.65088	4.37595	1.20904e-05	0.000878257
PVP01_1107900	P92	6-cysteine protein	45.6654	-8.85555	2.02897	-4.36455	1.27383e-05	0.000911081
PVP01_0504200	TRAG7	tryptophan-rich protein	95.6072	7.31913	1.6902	4.33032	1.4889e-05	0.00103312
PVP01_1101300		Plasmodium exported protein, unknown function	765.909	5.56203	1.28356	4.33327	1.46908e-05	0.00103312
PVP01_1402200		Plasmodium exported protein, unknown function	686.688	7.62833	1.77531	4.29689	1.7321e-05	0.0011842
PVP01_0902400		hypothetical protein	38.1332	8.63433	2.02085	4.27263	1.93181e-05	0.00124736
PVP01_0515900		Plasmodium exported protein (PHIST), unknown function	62.0087	7.41739	1.73406	4.27747	1.89033e-05	0.00124736
PVP01_1271600		Plasmodium exported protein, unknown function	353.721	5.52586	1.29324	4.27287	1.92969e-05	0.00124736
PVP01_1215900		CPW-WPC family protein	299.279	5.47442	1.27981	4.27752	1.88985e-05	0.00124736
PVP01_0623600		PIR protein	39.139	8.67869	2.0362	4.2622	2.0242e-05	0.00128911
PVP01_0300600		Plasmodium exported protein, unknown function	47.4259	8.94355	2.1118	4.23504	2.28514e-05	0.00139981
PVP01_1401900		lysophospholipase, putative	35.6651	8.54158	2.01684	4.23513	2.28417e-05	0.00139981
PVP01_0201400		PIR protein	39.6589	7.1746	1.69423	4.23472	2.28835e-05	0.00139981
PVP01_0623200		Plasmodium exported protein, unknown function	34.9415	8.51321	2.01714	4.22044	2.43826e-05	0.00147214
PVP01_0524900		Plasmodium exported protein (PHIST), unknown function	49.8415	8.98822	2.13957	4.20096	2.6579e-05	0.00158418
PVP01_1201900		Plasmodium exported protein, unknown function	40.4483	7.2089	1.72064	4.18966	2.79373e-05	0.00164406
PVP01_1401600		Plasmodium exported protein, unknown function	125.904	6.80973	1.63924	4.15419	3.2644e-05	0.00189702
PVP01_1253500	NNT	NAD(P) transhydrogenase, putative	85.6796	7.61235	1.83676	4.14446	3.40621e-05	0.001955
PVP01_0803400	IMC1c	inner membrane complex protein 1c, putative	60.4571	6.84667	1.65654	4.13311	3.5788e-05	0.002029
PVP01_0104700		serine/threonine protein kinase, putative	151.377	-5.63722	1.36651	-4.12526	3.7032e-05	0.00207424
PVP01_1470700		hypothetical protein	201.865	5.22193	1.26768	4.11927	3.80079e-05	0.00210356
PVP01_0001500		PIR protein	30.1453	8.30284	2.02623	4.09767	4.17324e-05	0.00228252
PVP01_1101400	TRAG19	tryptophan-rich protein	286.144	5.55951	1.35818	4.09336	4.25172e-05	0.0022984
PVP01_0422900		Plasmodium exported protein, unknown function	29.7125	8.27036	2.02874	4.0766	4.56995e-05	0.00244203
PVP01_0623400		Plasmodium exported protein, unknown function	29.6593	8.28	2.03331	4.07218	4.65758e-05	0.00246058
PVP01_0010570		Plasmodium exported protein, unknown function	28.541	8.22306	2.02283	4.06512	4.80083e-05	0.00250776
PVP01_1201500		Plasmodium exported protein (PHIST), unknown function	30.7671	8.33068	2.06711	4.03011	5.57514e-05	0.00287987
PVP01_0533200		lysophospholipase, putative	33.1077	6.92108	1.72746	4.0065	6.16252e-05	0.0031483
PVP01_0801600		Plasmodium exported protein, unknown function	550.44	4.76553	1.19648	3.98297	6.80581e-05	0.00343915
PVP01_0417300		serine-repeat antigen 4 (SERA)	188.832	-5.30899	1.33991	-3.96219	7.42653e-05	0.00371247
PVP01_0423600		Plasmodium exported protein (PHIST), unknown function	31.7559	8.36904	2.11781	3.95174	7.75852e-05	0.00383716
PVP01_0423100		Plasmodium exported protein (PHISTc), unknown function	159.09	8.54936	2.1651	3.94871	7.85729e-05	0.00384511
PVP01_1255800		conserved Plasmodium protein, unknown function	283.682	4.71654	1.19947	3.9322	8.41727e-05	0.00407624
PVP01_0107500	RAMA	rhoptry-associated membrane antigen, putative	523.582	-5.06016	1.28809	-3.92843	8.55008e-05	0.00409787
PVP01_1400900		Plasmodium exported protein, unknown function	25.5275	8.06421	2.05627	3.92176	8.79044e-05	0.00417008
PVP01_1255400	LAP5	LCCL domain-containing protein, putative	273.064	5.41613	1.38554	3.90904	9.2662e-05	0.00435137
PVP01_0000140	TRAG36	tryptophan-rich protein	29.4685	8.22638	2.12767	3.86637	0.000110466	0.00508623
PVP01_0801500		Plasmodium exported protein, unknown function	170.218	6.29438	1.62801	3.8663	0.000110499	0.00508623
PVP01_1401100		Plasmodium exported protein, unknown function	35.4187	8.50991	2.20372	3.86161	0.000112642	0.00513403
PVP01_1471600		Plasmodium exported protein, unknown function	36.2145	7.05073	1.83003	3.85281	0.000116772	0.0052706
PVP01_0004290		Plasmodium exported protein, unknown function	30.9028	8.32063	2.17522	3.82519	0.00013067	0.00573101
PVP01_0723600		conserved Plasmodium protein, unknown function	27.3386	7.20617	1.88315	3.82666	0.000129894	0.00573101
PVP01_0423000		Plasmodium exported protein, unknown function	334.572	5.81337	1.51859	3.82813	0.000129123	0.00573101
PVP01_1401200		Plasmodium exported protein, unknown function	30.1898	8.28821	2.17042	3.81871	0.000134153	0.00582877
PVP01_0533000	TRAG12	tryptophan-rich protein	126.49	6.16031	1.61467	3.81522	0.00013606	0.0058569
PVP01_0703800	RhopH3	high molecular weight rhoptry protein 3, putative	335.855	-6.37688	1.6729	-3.81187	0.000137921	0.00588252
PVP01_0516400		Plasmodium exported protein (PHIST), unknown function	20.7463	7.74797	2.03628	3.80496	0.000141825	0.005887
PVP01_1417200		conserved Plasmodium protein, unknown function	38.2241	7.12635	1.87249	3.80582	0.000141334	0.005887
PVP01_0202300		Plasmodium exported protein, unknown function	969.844	6.34626	1.66612	3.80901	0.000139526	0.005887
PVP01_0921300		conserved Plasmodium protein, unknown function	749.064	4.28766	1.1317	3.78871	0.000151433	0.00623021
PVP01_0404700		Plasmodium exported protein, unknown function	20.6348	6.81013	1.80144	3.78039	0.000156585	0.00638566
PVP01_0417000		serine-repeat antigen 3 (SERA)	166.381	-5.65758	1.50089	-3.76949	0.000163583	0.00661301
PVP01_1471800		Plasmodium exported protein, unknown function	23.5198	6.42394	1.71193	3.75246	0.000175106	0.00701781
PVP01_0701000		Plasmodium exported protein, unknown function	23.5941	7.94508	2.12099	3.74592	0.000179731	0.0071416
PVP01_0700400		Plasmodium exported protein, unknown function	22.9999	7.90943	2.11614	3.73766	0.000185741	0.00731789
PVP01_0000190		lysophospholipase, putative	33.46	6.2288	1.66848	3.73323	0.00018904	0.00734811
PVP01_0417700		serine-repeat antigen (SERA)	230.279	-4.86295	1.3029	-3.73239	0.000189669	0.00734811
PVP01_0115400		conserved Plasmodium protein, unknown function	59.2703	5.67902	1.52285	3.7292	0.000192088	0.00738032
PVP01_1271100		erythrocyte membrane protein 3, putative	17.6268	-6.54052	1.7604	-3.71537	0.000202909	0.00773215
PVP01_0532500		Plasmodium exported protein (PHIST), unknown function	53.7692	6.47678	1.74441	3.71287	0.000204924	0.00774547
PVP01_0950000		PIR protein	17.8729	7.53443	2.03526	3.70195	0.00021395	0.00802141
PVP01_1471500		Plasmodium exported protein, unknown function	20.2666	7.73184	2.09321	3.69377	0.000220953	0.00821768
PVP01_1136400	P12	6-cysteine protein	32.2379	-6.16385	1.67284	-3.68466	0.000229004	0.00844952
PVP01_1469600		PIR protein	23.142	6.40741	1.74263	3.67686	0.000236125	0.00864366
PVP01_0601600		Plasmodium exported protein (PHIST), unknown function	169.678	4.68061	1.27571	3.66903	0.000243476	0.00877459
PVP01_1469300		conserved Plasmodium protein, unknown function	205.107	4.34351	1.18379	3.66916	0.000243352	0.00877459
PVP01_1004900		conserved Plasmodium protein, unknown function	18.1869	7.57854	2.07556	3.65133	0.00026089	0.0092988
PVP01_1147100		conserved Plasmodium protein, unknown function	44.9982	6.21284	1.70205	3.65021	0.000262022	0.0092988
PVP01_1016500		UTP--glucose-1-phosphate uridylyltransferase, putative	69.4927	7.08816	1.9446	3.64506	0.000267332	0.00941536
PVP01_0702600	PH	PH domain-containing protein, putative	154.374	5.94898	1.63477	3.63904	0.000273655	0.00956558
PVP01_0115300	GAMER	gamete release protein, putative	78.6211	6.25074	1.72201	3.62991	0.000283517	0.0097635
PVP01_0524200		Plasmodium exported protein (PHIST), unknown function	34.4745	6.2632	1.72515	3.63052	0.000282851	0.0097635
PVP01_0005750		PIR protein, pseudogene	16.6251	7.42128	2.04771	3.62418	0.000289877	0.00990912
PVP01_1147400		Plasmodium exported protein, unknown function	94.8745	5.861	1.61989	3.61815	0.000296721	0.010069
PVP01_0623000		Plasmodium exported protein (PHIST), unknown function	16.5231	7.44131	2.06179	3.60915	0.000307207	0.0103493
PVP01_0201100	TRAG1	tryptophan-rich protein	381.024	6.21842	1.72425	3.60645	0.000310412	0.0103821
PVP01_0710700		conserved Plasmodium protein, unknown function	32.142	6.8771	1.91122	3.59828	0.000320333	0.0106373
PVP01_0525100		Plasmodium exported protein (PHIST), unknown function	15.2966	7.31455	2.03469	3.59491	0.000324503	0.0106994
PVP01_1400600		Plasmodium exported protein, unknown function, pseudogene	15.1183	7.29651	2.03548	3.58466	0.000337521	0.010973
PVP01_1029500		MOLO1 domain-containing protein, putative	115.934	6.05745	1.69281	3.57833	0.000345792	0.0111638
PVP01_1115900		conserved Plasmodium protein, unknown function	184.891	4.42773	1.23977	3.57141	0.000355062	0.011384
PVP01_1400800		Plasmodium exported protein, unknown function	14.1676	7.19551	2.04229	3.52327	0.000426263	0.0135733
PVP01_0808800		Plasmodium exported protein (PHIST), unknown function	53.8878	5.89325	1.67375	3.52099	0.000429931	0.0135969
PVP01_0624100		PIR protein	13.7898	7.17703	2.04447	3.51045	0.000447341	0.0140519
PVP01_1309400		zinc finger protein, putative	232.396	4.34703	1.24367	3.49533	0.00047348	0.0147732
PVP01_0000060		Plasmodium exported protein, unknown function	13.3739	7.13134	2.04295	3.49071	0.000481735	0.0149306
PVP01_0502800		PIR protein	13.6922	7.14166	2.04771	3.48764	0.000487306	0.0150032
PVP01_0949700		PIR protein	14.9019	7.2454	2.08149	3.48087	0.000499783	0.0152861
PVP01_0533800		PIR protein	13.0768	7.09762	2.04215	3.47556	0.000509789	0.0154903
PVP01_0300900		Plasmodium exported protein, unknown function	13.0174	7.09076	2.04203	3.47242	0.000515798	0.0155711
PVP01_1031300	MSP3.8	merozoite surface protein 3	13.2321	-7.0523	2.03368	-3.46775	0.000524828	0.0157415
PVP01_1425600		conserved Plasmodium protein, unknown function	18.1295	6.05846	1.75663	3.44892	0.000562842	0.0167734
PVP01_0000180		Plasmodium exported protein, unknown function	15.2541	7.32522	2.12521	3.44682	0.000567234	0.0167966
PVP01_0932300		conserved Plasmodium protein, unknown function	45.1421	6.2576	1.81722	3.4435	0.000574227	0.0168961
PVP01_0404400		Plasmodium exported protein, unknown function	12.8285	7.07774	2.05969	3.43632	0.000589674	0.0172358
PVP01_0318900		conserved Plasmodium protein, unknown function	71.2686	4.98116	1.45024	3.43471	0.000593187	0.0172358
PVP01_0422600	ETRAMP11.2	early transcribed membrane protein	1203.81	3.8783	1.13108	3.42884	0.000606164	0.0175035
PVP01_0302100		Plasmodium exported protein (PHIST), unknown function	12.1261	6.98291	2.04176	3.42004	0.000626108	0.0179678
PVP01_0524000		Plasmodium exported protein (PHIST), unknown function	37.4644	5.91533	1.73318	3.41299	0.000642542	0.0183263
PVP01_0935500	RPA2	DNA-directed RNA polymerase I subunit RPA2, putative	119.159	4.467	1.30993	3.41009	0.000649411	0.0184092
PVP01_0009180		PIR protein	13.4652	7.097	2.08235	3.40817	0.000654011	0.0184273
PVP01_0510800	IMC1i	inner membrane complex protein 1i, putative	62.7537	5.53568	1.62734	3.40168	0.000669728	0.0187564
PVP01_0318500		conserved Plasmodium protein, unknown function	237.378	4.43325	1.30503	3.39706	0.000681145	0.0189619
PVP01_0515100	PLP5	perforin-like protein 5	11.6507	6.92116	2.04319	3.38743	0.000705496	0.0190689
PVP01_0522900		Plasmodium exported protein (PHIST), unknown function, pseudogene	11.6507	6.92116	2.04319	3.38743	0.000705496	0.0190689
PVP01_0800400		Plasmodium exported protein, unknown function	28.2035	5.9668	1.76013	3.38999	0.000698962	0.0190689
PVP01_1033700		Plasmodium exported protein, unknown function	15.9034	5.83302	1.72187	3.38761	0.000705036	0.0190689
PVP01_0119100		28S ribosomal RNA	334.849	-4.71073	1.38965	-3.38987	0.000699255	0.0190689
PVP01_1469200	RON3	rhoptry neck protein 3, putative	308.225	-4.33802	1.28295	-3.38128	0.000721483	0.0193844
PVP01_0822100		conserved Plasmodium protein, unknown function	39.4007	5.876	1.7394	3.37818	0.000729678	0.0193844
PVP01_0532700		tryptophan-rich protein	114.398	4.23104	1.25227	3.3787	0.000728307	0.0193844
PVP01_0310300		conserved Plasmodium protein, unknown function	459.246	4.1116	1.21829	3.37488	0.000738481	0.0195068
PVP01_1251100	CCp2	LCCL domain-containing protein	509.187	5.18997	1.54877	3.35102	0.000805149	0.0211477
PVP01_0735100		Plasmodium exported protein, unknown function	22.8386	7.85815	2.35276	3.33997	0.00083786	0.021761
PVP01_1440200		conserved Plasmodium protein, unknown function	74.16	4.51209	1.35042	3.34125	0.000834016	0.021761
PVP01_0948900		tryptophan-rich protein	16.1222	7.32431	2.19933	3.33025	0.00086768	0.0224102
PVP01_0525000		Plasmodium exported protein (PHIST), unknown function	14.2333	7.2218	2.17358	3.32254	0.000892012	0.022661
PVP01_0524600		Plasmodium exported protein (PHIST), unknown function	23.4562	5.69785	1.71486	3.32264	0.000891708	0.022661
PVP01_1427000		conserved Plasmodium protein, unknown function	150.307	4.71087	1.41662	3.32543	0.00088283	0.022661
PVP01_0734700		hypothetical protein	169.801	-3.99245	1.20289	-3.31905	0.000903252	0.0228218
PVP01_1216400	EF-1gamma	elongation factor 1-gamma, putative	131.076	-4.36561	1.31829	-3.31156	0.000927765	0.0231891
PVP01_0700300		Plasmodium exported protein, unknown function	13.8173	7.18072	2.16797	3.31219	0.000925701	0.0231891
PVP01_0423400		Plasmodium exported protein, unknown function	127.748	-4.42862	1.3384	-3.3089	0.000936623	0.0232853
PVP01_0801700		STP1 protein	174.343	3.88739	1.17767	3.30092	0.000963689	0.0238308
PVP01_1341700	CCp3	LCCL domain-containing protein, putative	402.574	4.62254	1.40388	3.2927	0.0009923	0.02428
PVP01_1469800	TRAG22	tryptophan-rich protein	113.151	4.18581	1.27084	3.29372	0.000988699	0.02428
PVP01_0839100		PIR protein	12.6884	7.0623	2.15255	3.2809	0.00103478	0.0251869
PVP01_0616100	P25	ookinete surface protein P25	386.943	5.15562	1.57395	3.27559	0.0010544	0.0253985
PVP01_1425700		conserved Plasmodium protein, unknown function	18.6792	7.58123	2.31381	3.27651	0.00105098	0.0253985
PVP01_0518500	DMC1	meiotic recombination protein DMC1, putative	353.22	4.13	1.26259	3.27105	0.0010715	0.0256419
PVP01_0949800		Plasmodium exported protein, unknown function	10.284	6.72344	2.05696	3.26863	0.00108068	0.0256419
PVP01_0718700		conserved Plasmodium protein, unknown function	38.8945	5.41737	1.65743	3.26854	0.00108105	0.0256419
PVP01_0801400		Plasmodium exported protein, unknown function	27.9954	5.51598	1.69037	3.26318	0.00110168	0.0259986
PVP01_0202500		Plasmodium exported protein, unknown function	104.008	4.00749	1.23022	3.25754	0.00112382	0.026387
PVP01_0902300		hypothetical protein	31.9786	8.29928	2.55146	3.25275	0.00114293	0.0264544
PVP01_0524100		Plasmodium exported protein (PHIST), unknown function	17.3125	7.47681	2.29908	3.25208	0.00114563	0.0264544
PVP01_1302100		conserved Plasmodium protein, unknown function	14.1971	5.70577	1.75307	3.25474	0.00113496	0.0264544
PVP01_0927700		protein phosphatase, putative	69.982	4.18597	1.28754	3.25114	0.00114945	0.0264544
PVP01_0526400		conserved Plasmodium protein, unknown function	266.646	5.67607	1.74852	3.24621	0.00116951	0.0267836
PVP01_0217000		heat shock protein, putative	46.7379	5.99569	1.84861	3.24336	0.00118129	0.0267894
PVP01_0801200		Plasmodium exported protein, unknown function	140.107	4.25008	1.30994	3.2445	0.00117659	0.0267894
PVP01_1471300		Plasmodium exported protein, unknown function	11.3811	6.9104	2.1339	3.23839	0.00120205	0.0270598
PVP01_0516500		Plasmodium exported protein (PHIST), unknown function	23.334	5.47666	1.69151	3.23773	0.00120486	0.0270598
PVP01_1439700	IMC1h	inner membrane complex protein 1h, putative	59.2837	4.64993	1.43838	3.23276	0.001226	0.0274024
PVP01_0728900	MSP1	merozoite surface protein 1	544.177	-4.10634	1.27352	-3.22441	0.00126234	0.0280796
PVP01_0301500		Plasmodium exported protein, unknown function	9.43089	6.63275	2.0622	3.21635	0.00129834	0.0287428
PVP01_0836300		phosphatidylethanolamine-binding protein, putative	96.0425	4.7831	1.48821	3.21399	0.00130906	0.0288428
PVP01_0508600		conserved Plasmodium protein, unknown function	44.0385	5.63653	1.75935	3.20376	0.00135647	0.0297463
PVP01_1231100	PMV	plasmepsin V	148.37	-3.82166	1.19675	-3.19337	0.00140624	0.0306929
PVP01_1007800		RAP protein, putative	8.95553	6.55445	2.05981	3.18207	0.00146228	0.031767
PVP01_1149100		PIR protein	17.9367	7.45143	2.34483	3.17781	0.00148389	0.0318792
PVP01_0534200		Plasmodium exported protein, unknown function	13.8067	7.16631	2.25559	3.17713	0.00148739	0.0318792
PVP01_1207200		conserved Plasmodium protein, unknown function	52.4737	4.36504	1.37395	3.17701	0.00148801	0.0318792
PVP01_1257600	MUS81	crossover junction endonuclease MUS81, putative	18.9497	-6.1053	1.92359	-3.17391	0.00150398	0.0320735
PVP01_0507000		conserved Plasmodium protein, unknown function	13.569	7.14249	2.2523	3.17121	0.00151808	0.0321647
PVP01_1470900		PIR protein, pseudogene	12.5251	6.95226	2.19375	3.16912	0.00152902	0.0321647
PVP01_0518800	HSP20	small heat shock protein HSP20, putative	26.6297	5.16956	1.64264	3.14711	0.00164892	0.034376
PVP01_0600900		Plasmodium exported protein, unknown function	74.4539	4.40265	1.3987	3.14767	0.00164576	0.034376
PVP01_0838200		Plasmodium exported protein (PHIST), unknown function	78.4764	5.16048	1.64064	3.14541	0.00165853	0.0344219
PVP01_1318200		OST-HTH associated domain protein, putative	71.7893	4.25037	1.35203	3.1437	0.00166828	0.0344704
PVP01_0522700		Plasmodium exported protein (PHIST), unknown function	396.264	3.69075	1.17502	3.14101	0.00168366	0.0346343
PVP01_1310200		kinesin-7, putative	129.525	3.97787	1.27168	3.12804	0.00175979	0.0360408
PVP01_0523600		Plasmodium exported protein (PHIST), unknown function, pseudogene	14.0319	7.10206	2.27368	3.1236	0.00178652	0.0364278
PVP01_0005740		PIR protein	8.43138	6.42928	2.06751	3.10968	0.00187289	0.0380222
PVP01_0616300	MORN1	MORN repeat-containing protein 1, putative	91.3535	3.92578	1.26319	3.10783	0.00188468	0.0380951
PVP01_1208500	ALBA2	DNA/RNA-binding protein Alba 2, putative	78.1435	5.25926	1.69787	3.09757	0.00195114	0.0392677
PVP01_1341600	NOP1	rRNA 2'-O-methyltransferase fibrillarin, putative	30.01	4.67403	1.51105	3.09324	0.00197983	0.0393937
PVP01_1223200		CPW-WPC family protein	110.563	3.80771	1.23075	3.09381	0.00197605	0.0393937
PVP01_1227100		conserved Plasmodium protein, unknown function	361.034	3.64248	1.17773	3.09279	0.00198282	0.0393937
PVP01_0800100		PIR protein	7.88508	-6.32039	2.0495	-3.08387	0.0020433	0.0404225
PVP01_1252100		conserved Plasmodium protein, unknown function	10.1821	6.74807	2.19955	3.06793	0.00215545	0.0424606
PVP01_1446800	MSP9	merozoite surface protein 9	5174.23	-5.08982	1.66366	-3.0594	0.00221779	0.0435043
PVP01_0502400		PIR protein	9.82557	6.69882	2.19374	3.05361	0.00226105	0.0441664
PVP01_0119600		Plasmodium exported protein, unknown function	7.58887	6.29518	2.06269	3.05193	0.00227377	0.0442291
PVP01_1225000		conserved Plasmodium protein, unknown function	1523.18	3.67408	1.20605	3.04637	0.0023162	0.0448667
PVP01_0010030		Plasmodium exported protein, unknown function	9.46905	6.64784	2.1871	3.03957	0.00236917	0.0457025
PVP01_0119300		Plasmodium exported protein, unknown function	8.56085	6.41636	2.11567	3.03277	0.00242316	0.0465508
PVP01_0620600		conserved Plasmodium protein, unknown function	121.354	-3.63084	1.19795	-3.03088	0.00243838	0.0466504
PVP01_0424200		Plasmodium exported protein, unknown function	7.39998	6.28878	2.0799	3.02359	0.00249793	0.0473996
PVP01_0906100		conserved Plasmodium protein, unknown function	113.981	-3.73571	1.23531	-3.02411	0.00249368	0.0473996
PVP01_0417100		serine-repeat antigen 1 (SERA)	161.048	-5.36854	1.77899	-3.01774	0.00254663	0.0481272
PVP01_1235100		conserved Plasmodium protein, unknown function	109.671	4.46394	1.4812	3.01372	0.00258062	0.0485721
PVP01_0838100		Plasmodium exported protein, unknown function	42.8308	5.38829	1.79145	3.00779	0.00263156	0.0493311
PVP01_1026000	P38	6-cysteine protein	86.1873	-3.83233	1.27596	-3.0035	0.00266896	0.0494343
PVP01_1026800	SUB3	subtilisin-like protease 3, putative	41.6671	-5.34855	1.78009	-3.00465	0.00265888	0.0494343
PVP01_0102500		Plasmodium exported protein (PHIST), unknown function, pseudogene	251.504	3.55331	1.18266	3.0045	0.00266018	0.0494343
PVP01_1219600			61.8738	-4.85942	1.62707	-2.9866	0.00282098	0.0520426
PVP01_0832800			10.3607	-5.23597	1.75482	-2.98377	0.00284723	0.0523193
PVP01_1145200			8.68635	-6.47695	2.17403	-2.97924	0.00288969	0.0528904
PVP01_0839400			8.04297	6.42102	2.16053	2.97197	0.00295897	0.0537354
PVP01_0532600			197.599	3.65506	1.2296	2.97255	0.00295333	0.0537354
PVP01_0424000			6.93525	6.14738	2.07346	2.96479	0.00302889	0.0546909
PVP01_1109100			100.158	3.79999	1.28198	2.96416	0.00303512	0.0546909
PVP01_0523500			7.86471	6.38963	2.15711	2.96212	0.00305528	0.0548417
PVP01_1271300			19.9268	5.04978	1.70763	2.95718	0.00310463	0.0555133
PVP01_1148700			7.68645	6.35746	2.15369	2.95189	0.00315836	0.0562575
PVP01_1241100			24.0055	5.3467	1.81416	2.9472	0.00320663	0.0563145
PVP01_1204900			11.9508	5.02775	1.70499	2.94885	0.00318964	0.0563145
PVP01_0916600			96.5557	-4.42778	1.50238	-2.94719	0.00320681	0.0563145
PVP01_1406900			6.7369	-6.06865	2.05935	-2.94688	0.00321001	0.0563145
PVP01_1144800			963.249	-3.98075	1.3534	-2.9413	0.00326839	0.0571231
PVP01_0809100			14.0464	5.70123	1.94152	2.93649	0.00331954	0.0577998
PVP01_0312000			15.4407	5.07611	1.73037	2.93353	0.00335128	0.0581348
PVP01_0810400			39.4639	4.78123	1.63629	2.92198	0.0034781	0.0601103
PVP01_0102400			14.3774	5.02571	1.72643	2.91105	0.00360222	0.0620248
PVP01_0616000			171.105	4.42165	1.52368	2.90196	0.00370837	0.063617
PVP01_1031000			45.4192	-4.80072	1.66187	-2.88873	0.00386796	0.0661108
PVP01_0715100			110.699	4.85338	1.68561	2.87931	0.00398548	0.0676223
PVP01_1212200			234.803	3.99674	1.38801	2.87948	0.00398328	0.0676223
PVP01_0508500			245.546	5.16564	1.79683	2.87486	0.00404208	0.0683332
PVP01_0004320			10.3497	6.74658	2.34876	2.87241	0.0040736	0.0686166
PVP01_0515700			40.6876	4.17566	1.4547	2.87046	0.00409876	0.0687912
PVP01_1437600			11.9073	5.46902	1.9099	2.86352	0.00418969	0.0700642
PVP01_1219200			171.488	3.59357	1.2567	2.85954	0.00424261	0.070695
PVP01_0006750			7.72897	6.23568	2.18194	2.85785	0.00426517	0.0708171
PVP01_0417400			15.1327	-5.10614	1.78915	-2.85396	0.00431786	0.0714367
PVP01_0949600			6.28163	5.9782	2.09647	2.85156	0.00435055	0.0717223
PVP01_0503400			8.60103	4.95692	1.74195	2.84562	0.00443253	0.0728156
PVP01_1401800			137.11	6.47171	2.27673	2.84254	0.0044755	0.0732626
PVP01_0838700			18.7304	7.46992	2.63173	2.83841	0.00453392	0.0737
PVP01_0404500			529.286	4.519	1.59171	2.83909	0.00452424	0.0737
PVP01_0205200			110.192	-3.71526	1.30997	-2.83613	0.00456635	0.0739684
PVP01_0819300			480.92	-3.31025	1.16879	-2.8322	0.00462292	0.0746248
PVP01_0534900			7.61013	6.20767	2.19544	2.82753	0.00469089	0.0752365
PVP01_0605400			610.627	3.7159	1.31426	2.82737	0.00469318	0.0752365
PVP01_0414100			6.01173	-5.87588	2.08186	-2.82242	0.0047662	0.0761446
PVP01_1327600			45.0811	4.58531	1.62702	2.81824	0.00482883	0.0768809
PVP01_0622400			73.0748	-3.6165	1.28466	-2.81514	0.00487565	0.0773615
PVP01_1401300			350.82	3.33241	1.18678	2.80795	0.0049858	0.0788401
PVP01_1471400			5.72559	5.93462	2.11721	2.80304	0.00506235	0.0795635
PVP01_1314300			43.1502	4.45705	1.5902	2.80282	0.00506578	0.0795635
PVP01_0217100			65.6092	4.5746	1.63745	2.79373	0.00521033	0.0815583
PVP01_1008000			10.1841	5.24828	1.88123	2.78981	0.00527395	0.0822771
PVP01_0530400			28.6549	5.0235	1.80374	2.78504	0.00535207	0.0832166
PVP01_1030800			72.0914	3.46025	1.24434	2.78079	0.00542263	0.0840328
PVP01_1331400			5.48791	5.87166	2.11356	2.77809	0.00546792	0.0844466
PVP01_0611300			61.3558	3.57602	1.28771	2.77704	0.00548567	0.0844466
PVP01_0010670			8.31391	-4.92457	1.77609	-2.7727	0.00555929	0.0852975
PVP01_1147300			123.588	3.31658	1.19934	2.76533	0.00568647	0.0869618
PVP01_1433600			56.5194	5.39777	1.95628	2.7592	0.00579431	0.0880319
PVP01_1109400			51.4227	4.05012	1.46752	2.75984	0.00578296	0.0880319
PVP01_0927300			185.15	3.83457	1.39637	2.74611	0.00603071	0.091325
PVP01_1241400			5.19081	5.78789	2.10956	2.74365	0.00607608	0.0917133
PVP01_1249800			41.85	4.01044	1.46388	2.73959	0.00615151	0.0919561
PVP01_1235200			146.058	3.99832	1.4585	2.74139	0.00611795	0.0919561
PVP01_0201500			135.612	3.694	1.34808	2.74018	0.00614047	0.0919561
PVP01_1259400			54.9937	4.65249	1.69962	2.73737	0.00619324	0.0922832
PVP01_1416900			47.2778	3.56595	1.30485	2.73284	0.00627902	0.0932626
PVP01_0103900			8.81745	5.04306	1.85646	2.71649	0.00659782	0.0970672
PVP01_0701200			7.59089	4.75185	1.74808	2.71832	0.00656146	0.0970672
PVP01_0942600			56.9981	4.26468	1.56963	2.717	0.00658774	0.0970672
PVP01_0941800			128.574	4.84529	1.78634	2.71241	0.00667966	0.0979613
PVP01_0700500			8.63919	5.01378	1.85312	2.70559	0.00681828	0.0995857
PVP01_0300800			50.315	4.62751	1.71116	2.70431	0.00684456	0.0995857
PVP01_0734400			82.5562	3.59778	1.33063	2.70382	0.00685468	0.0995857
PVP01_0518000			53.8782	-4.59444	1.70746	-2.69081	0.00712793	0.103233
PVP01_0903400			4.96376	5.64158	2.10043	2.68592	0.00723313	0.103786
PVP01_1470000			87.8697	4.53958	1.68969	2.68664	0.00721755	0.103786
PVP01_1025900			75.1798	-3.48381	1.29667	-2.68674	0.00721526	0.103786
PVP01_1246800			12.4282	4.53704	1.69149	2.68227	0.00731248	0.104602
PVP01_0917300			116.951	3.70203	1.38384	2.67518	0.00746896	0.106436
PVP01_0704900			49.6353	3.58439	1.34026	2.67439	0.00748649	0.106436
PVP01_0000100			243.139	3.13018	1.17185	2.67115	0.00755913	0.107142
PVP01_0600600			7.07535	6.07375	2.27741	2.66696	0.00765407	0.108157
PVP01_1034300			4.59661	5.59964	2.10462	2.66064	0.00779916	0.109679
PVP01_0601700			28.0818	4.34603	1.63371	2.66022	0.00780894	0.109679
PVP01_1456700			210.852	3.43731	1.29495	2.65439	0.00794517	0.111256
PVP01_0523300			5.65554	5.92712	2.24789	2.63675	0.00837053	0.116861
PVP01_0712800			67.5175	3.57753	1.35892	2.63262	0.00847288	0.117935
PVP01_1401700			139.293	3.28836	1.25359	2.62315	0.00871219	0.120904
PVP01_0000110			7.33195	4.77596	1.82817	2.61243	0.00899011	0.124021
PVP01_0202600			82.2843	4.01756	1.53732	2.61335	0.00896588	0.124021
PVP01_1235000			40.9873	4.61586	1.77445	2.60129	0.00928729	0.127697
PVP01_0949000			45.7184	4.48996	1.72704	2.5998	0.00932775	0.127697
PVP01_1424400			17.3854	4.35779	1.67647	2.59939	0.00933902	0.127697
PVP01_1213700			5.27149	5.65946	2.18189	2.59383	0.00949141	0.12924
PVP01_0418300			52.3	-3.32401	1.28179	-2.59325	0.00950743	0.12924
PVP01_0507200			294.167	3.252	1.25882	2.58337	0.00978413	0.132614
PVP01_0913800			79.0345	-3.45579	1.34134	-2.57638	0.00998399	0.134929
PVP01_0602300			41.2487	-4.41944	1.72085	-2.56818	0.0102235	0.137766
PVP01_1248500			4.06183	5.39856	2.10657	2.56273	0.0103853	0.139542
PVP01_0620500			8.65198	-4.4967	1.75806	-2.55776	0.0105349	0.141143
PVP01_0201300			5.15265	5.61622	2.19964	2.55324	0.0106725	0.141367
PVP01_1410500			5.15265	5.61622	2.19964	2.55324	0.0106725	0.141367
PVP01_1272400			11.1591	4.40991	1.72621	2.55468	0.0106287	0.141367
PVP01_1034200			70.6215	3.37397	1.32146	2.55322	0.0106732	0.141367
PVP01_0822900			242.891	-3.20844	1.26153	-2.5433	0.0109811	0.144909
PVP01_0010220			4.3275	-5.37179	2.11271	-2.5426	0.011003	0.144909
PVP01_1009400			13.6197	-4.86963	1.91927	-2.53723	0.0111734	0.146737
PVP01_0306600			56.1559	3.60735	1.42462	2.53215	0.0113366	0.148445
PVP01_1403000			57.8717	3.5454	1.40068	2.5312	0.0113673	0.148445
PVP01_0828500			70.5324	3.88329	1.53521	2.52949	0.0114228	0.148753
PVP01_0115200			21.5695	7.66063	3.03248	2.52619	0.0115307	0.149
PVP01_1119300			40.7786	4.39354	1.73935	2.52597	0.011538	0.149
PVP01_0915800			36.5657	4.24693	1.68114	2.52622	0.0115297	0.149
PVP01_1025500			218.895	-3.34009	1.32379	-2.52313	0.0116317	0.149794
PVP01_1110600			8.95957	4.31137	1.71471	2.51435	0.0119253	0.153151
PVP01_0618900			67.016	3.72535	1.49186	2.49712	0.0125207	0.160355
PVP01_0944500			132.277	3.41629	1.36908	2.49533	0.0125841	0.160724
PVP01_1312200			5.89668	-4.3835	1.75747	-2.49421	0.0126238	0.160789
PVP01_0202100			78.5701	3.48157	1.39921	2.48824	0.0128378	0.163026
PVP01_0206000			1321.61	3.45598	1.38942	2.48736	0.0128695	0.163026
PVP01_1463500			47.3248	3.15509	1.27056	2.48323	0.0130197	0.164479
PVP01_0624700			3.70531	5.24112	2.11428	2.47891	0.0131783	0.166033
PVP01_0944000			27.6118	4.24358	1.71537	2.47386	0.0133662	0.167944
PVP01_1270400			528.192	4.75588	1.92585	2.4695	0.0135303	0.16825
PVP01_1461400			54.4515	4.56695	1.84877	2.47027	0.0135012	0.16825
PVP01_0946800			22.0391	4.53868	1.83799	2.46937	0.0135353	0.16825
PVP01_0210000			41.2757	3.83428	1.55123	2.47177	0.0134447	0.16825
PVP01_0904300			30.4213	4.63274	1.87933	2.46511	0.0136973	0.168968
PVP01_1125700			499.563	3.47176	1.41001	2.46223	0.0138076	0.168968
PVP01_0937000			95.1288	3.46221	1.40451	2.46507	0.0136986	0.168968
PVP01_1430400			48.4219	3.20015	1.29892	2.4637	0.0137513	0.168968
PVP01_0525700			52.2388	-3.82207	1.55226	-2.46226	0.0138064	0.168968
PVP01_0304200			5.71539	-4.33085	1.75898	-2.46214	0.0138111	0.168968
PVP01_1243800			33.6698	3.2783	1.3334	2.45861	0.0139476	0.170029
PVP01_0408500			65.0516	-4.37668	1.78058	-2.45801	0.013971	0.170029
PVP01_0809000			6.22423	4.40378	1.79315	2.45589	0.0140535	0.170587
PVP01_1034600			9.23776	4.95112	2.01838	2.45302	0.0141662	0.170592
PVP01_1403200			11.3978	4.23542	1.72585	2.4541	0.0141237	0.170592
PVP01_1467200			2428.21	3.23105	1.31764	2.45215	0.0142007	0.170592
PVP01_1255000			103.74	-4.31023	1.75762	-2.45231	0.0141943	0.170592
PVP01_0003290			5.69806	5.72812	2.3387	2.44927	0.0143146	0.171517
PVP01_0000090			33.9317	3.17255	1.29733	2.44544	0.0144674	0.172902
PVP01_1143200			31.8703	3.17236	1.30163	2.43723	0.0148004	0.175997
PVP01_0517600			104.678	-3.19657	1.31158	-2.43719	0.014802	0.175997
PVP01_0702200			64.3338	3.33643	1.37467	2.42707	0.0152211	0.180518
PVP01_1418600			5.54935	4.3553	1.79728	2.42328	0.0153811	0.181951
PVP01_0009410			5.48993	4.33841	1.79649	2.41493	0.0157381	0.185701
PVP01_1020200			605.052	3.59718	1.4921	2.41081	0.015917	0.187337
PVP01_1467500			179.993	3.61759	1.50184	2.40877	0.0160062	0.187912
PVP01_1147200			13.59	4.36252	1.81511	2.40345	0.016241	0.190188
PVP01_0005450			6.48115	5.90605	2.46218	2.39871	0.0164531	0.191705
PVP01_0523700			6.48115	5.90605	2.46218	2.39871	0.0164531	0.191705
PVP01_0734200			13.0361	4.05242	1.69074	2.39683	0.0165374	0.192206
PVP01_1119500			42.6687	6.42891	2.68582	2.39365	0.0166817	0.192656
PVP01_1208000			168.137	3.79986	1.58818	2.39258	0.0167302	0.192656
PVP01_0927000			26.6358	3.69395	1.54467	2.39142	0.0167833	0.192656
PVP01_1252800			66.4372	3.55428	1.48464	2.39403	0.0166644	0.192656
PVP01_0941700			66.8525	3.20308	1.33904	2.39207	0.0167534	0.192656
PVP01_1465500			88.4608	4.49934	1.88248	2.39012	0.0168429	0.192863
PVP01_1344000			130.751	3.00702	1.25964	2.38721	0.0169767	0.193918
PVP01_0010020			4.34931	4.62228	1.93716	2.38611	0.0170277	0.194023
PVP01_1316200			10.228	-4.04073	1.69591	-2.38264	0.0171891	0.195384
PVP01_1214400			16.9757	4.39435	1.85048	2.3747	0.017563	0.198663
PVP01_0216900			32.9702	-3.87548	1.63158	-2.37529	0.017535	0.198663
PVP01_1306800			54.109	4.50923	1.90428	2.36795	0.0178869	0.201025
PVP01_0319200			11.4201	4.0128	1.69484	2.36765	0.0179016	0.201025
PVP01_0612700			80.8973	2.84781	1.20245	2.36833	0.0178684	0.201025
PVP01_1305900			26.1274	-3.90988	1.65338	-2.36478	0.018041	0.202102
PVP01_1244300			38.6312	3.14255	1.33031	2.36226	0.0181639	0.202991
PVP01_1135800			123.657	-3.07266	1.30307	-2.35801	0.0183733	0.204838
PVP01_1135300			3042.11	-2.77365	1.17888	-2.35278	0.0186339	0.207246
PVP01_1422300			35.3057	-4.00839	1.70507	-2.35086	0.0187301	0.207819
PVP01_0602500			52.8186	-3.01526	1.28334	-2.34954	0.0187965	0.208059
PVP01_1128100			111.667	4.00016	1.70504	2.34608	0.0189723	0.20939
PVP01_1227300			70.0019	3.90256	1.66436	2.34479	0.0190379	0.20939
PVP01_1201700			162.774	2.73715	1.16747	2.34451	0.0190519	0.20939
PVP01_1125200			32.6725	4.03926	1.72472	2.34198	0.0191817	0.209825
PVP01_0712600			12.9279	4.02782	1.71922	2.34282	0.0191385	0.209825
PVP01_1135700			10.6151	-4.37071	1.86727	-2.3407	0.0192476	0.210052
PVP01_1424500			11.884	6.83173	2.92656	2.33439	0.0195756	0.212948
PVP01_1203800			961.744	2.7623	1.18359	2.33383	0.0196046	0.212948
PVP01_1313200			118.981	2.931	1.26109	2.32417	0.0201165	0.217999
PVP01_1204600			8.04701	4.2122	1.81448	2.32144	0.020263	0.218568
PVP01_0820000			88.9038	3.08381	1.32832	2.32158	0.0202557	0.218568
PVP01_0004270			8.28501	6.2515	2.69476	2.31988	0.0203476	0.218596
PVP01_0622700			13.7777	4.05535	1.74854	2.31928	0.0203798	0.218596
PVP01_1452800			179.185	3.51776	1.51707	2.31879	0.0204067	0.218596
PVP01_1433800			7.98759	4.2011	1.81331	2.31681	0.0205142	0.219242
PVP01_1431300			10.0524	3.98327	1.72047	2.31521	0.0206012	0.219668
PVP01_0601100			11.7331	4.32477	1.87232	2.30985	0.0208966	0.220455
PVP01_0723700			13.2356	4.06002	1.75709	2.31066	0.0208519	0.220455
PVP01_0836100			73.9033	3.41376	1.47615	2.31261	0.0207442	0.220455
PVP01_1018500			242.257	3.25595	1.40921	2.31047	0.0208622	0.220455
PVP01_0405900			429.414	3.02871	1.31149	2.30937	0.0209231	0.220455
PVP01_1449200			70.5485	2.87275	1.24431	2.30871	0.0209596	0.220455
PVP01_0814600			260.189	2.91949	1.26603	2.30603	0.0211089	0.221524
PVP01_1031100			23.4004	3.60047	1.56217	2.30478	0.0211788	0.221757
PVP01_0404900			53.5078	5.10202	2.22802	2.28993	0.0220252	0.230101
PVP01_0004300			5.0252	4.09684	1.79092	2.28756	0.0221632	0.230795
PVP01_1415000			4.71747	4.09316	1.79009	2.28656	0.0222214	0.230795
PVP01_0912400			138.705	2.74603	1.20112	2.28624	0.0222405	0.230795
PVP01_0512400			8.18812	3.91269	1.71247	2.28482	0.0223231	0.231137
PVP01_0716500			24.0167	3.88491	1.70343	2.28064	0.0225699	0.232734
PVP01_1120100			33.5182	3.79592	1.6645	2.28051	0.0225775	0.232734
PVP01_1338500			46.5917	-3.07316	1.34906	-2.278	0.0227267	0.233753
PVP01_0403900			5.9663	4.06339	1.78454	2.27699	0.0227867	0.233853
PVP01_0725100			13.5845	-3.84451	1.69056	-2.2741	0.0229599	0.235111
PVP01_1221400			16.2716	-4.00147	1.76114	-2.27209	0.0230812	0.235834
PVP01_0004250			30.3515	4.27997	1.88458	2.27104	0.0231443	0.23596
PVP01_0412000			53.9562	-2.97084	1.31035	-2.26721	0.0233776	0.237817
PVP01_0901200			9.56663	6.53375	2.88685	2.26328	0.0236185	0.239221
PVP01_1416600			24.9314	-3.32662	1.46957	-2.26367	0.0235944	0.239221
PVP01_0805500			6.97458	-3.89831	1.72439	-2.26069	0.0237783	0.240316
PVP01_1024300			642.545	3.26673	1.44587	2.25936	0.023861	0.240628
PVP01_0701500			16.5851	3.86609	1.71854	2.24963	0.0244724	0.243624
PVP01_0205000			64.431	3.85776	1.71242	2.25281	0.0242712	0.243624
PVP01_1328800			51.0753	2.79597	1.24248	2.25032	0.024429	0.243624
PVP01_1256500			100.259	-2.79696	1.24224	-2.25154	0.0243512	0.243624
PVP01_0208300			55.7297	-2.88476	1.28225	-2.24977	0.0244636	0.243624
PVP01_0414500			6.91415	-3.88333	1.72575	-2.25022	0.0244348	0.243624
PVP01_0820300			40.8316	3.76827	1.67692	2.24713	0.0246315	0.244683
PVP01_0106000			8.97243	6.44614	2.87504	2.2421	0.0249549	0.246841
PVP01_0612400			1569.85	-2.52322	1.12508	-2.2427	0.0249159	0.246841
PVP01_1409400			140.76	-2.66948	1.19112	-2.24114	0.0250168	0.246928
PVP01_1439400			16.2763	3.9612	1.76865	2.23968	0.0251118	0.247341
PVP01_0000200			12.7898	3.76837	1.6867	2.23416	0.0254723	0.250361
PVP01_0835700			11.9718	4.18017	1.87345	2.23128	0.0256629	0.251702
PVP01_0524300			10.1723	3.82229	1.71745	2.22556	0.0260439	0.254901
PVP01_0705400			4.42037	3.98291	1.79064	2.2243	0.0261285	0.255192
PVP01_1417300			12.9556	5.54759	2.49748	2.22128	0.0263321	0.25557
PVP01_0921000			54.6126	-2.87901	1.29578	-2.22183	0.0262949	0.25557
PVP01_1322600			16.9636	-3.68177	1.65659	-2.2225	0.0262494	0.25557
PVP01_0623100			618.5	-2.72174	1.22704	-2.21813	0.026546	0.25689
PVP01_1110900			87.0754	-2.82234	1.27267	-2.21765	0.0265786	0.25689
PVP01_0728100			22.5837	5.72232	2.58255	2.21576	0.0267078	0.257603
PVP01_0921900			175.962	-2.99296	1.35183	-2.214	0.0268288	0.258234
PVP01_0801300			4.36095	3.95952	1.79106	2.21071	0.0270557	0.25988
PVP01_0111500			12.9468	3.83109	1.73736	2.20512	0.0274454	0.262538
PVP01_1437400			12.8594	-3.75657	1.7032	-2.2056	0.0274123	0.262538
PVP01_1031200			4.27289	-3.92459	1.78752	-2.19555	0.0281243	0.268481
PVP01_0907700			17.9825	3.75771	1.71651	2.18916	0.0285851	0.271763
PVP01_0812300			18.2607	-3.69287	1.68662	-2.18951	0.0285597	0.271763
PVP01_0320600			109.695	3.09927	1.41699	2.18723	0.0287261	0.272546
PVP01_0314900			138.53	2.70416	1.23693	2.18619	0.0288018	0.272708
PVP01_0711600			108.368	-2.54641	1.16542	-2.18497	0.0288909	0.272873
PVP01_1204300			85.6465	-2.77726	1.27144	-2.18435	0.0289366	0.272873
PVP01_1337900			53.6054	2.6556	1.21743	2.18131	0.0291604	0.274427
PVP01_0947400			153.959	2.57397	1.18184	2.17793	0.0294113	0.276228
PVP01_0600300			20.4154	7.50239	3.45404	2.17206	0.0298512	0.279795
PVP01_1246000			8.18117	-3.70555	1.70756	-2.17008	0.0300004	0.280628
PVP01_0522800			37.1127	3.63992	1.67865	2.16837	0.0301308	0.280718
PVP01_1436700			26.0344	2.90723	1.34073	2.16839	0.0301292	0.280718
PVP01_0304100			26.8061	-2.85382	1.31869	-2.16414	0.0304539	0.28316
PVP01_0734500			118.164	-3.79604	1.75527	-2.16265	0.0305682	0.283656
PVP01_0216700			1022.21	2.42965	1.12572	2.1583	0.0309045	0.286143
PVP01_1025100			446.188	-2.43878	1.13032	-2.1576	0.0309593	0.286143
PVP01_0801800			19.9728	3.53553	1.63955	2.15641	0.0310517	0.286428
PVP01_0114800			773.117	-2.82865	1.31408	-2.15257	0.0313524	0.288628
PVP01_0839000			6.83331	6.0768	2.82481	2.15123	0.0314581	0.289029
PVP01_0711000			48.8649	2.62317	1.22033	2.14956	0.0315901	0.289099
PVP01_0104500			124.956	-2.67185	1.24281	-2.14984	0.031568	0.289099
PVP01_1403300			14.9175	5.39521	2.51327	2.14669	0.0318179	0.289474
PVP01_1218000			35.9591	3.56682	1.66143	2.14684	0.0318059	0.289474
PVP01_1456200			28.2668	3.08344	1.43596	2.1473	0.0317691	0.289474
PVP01_0720800			58.9816	3.19252	1.48934	2.14358	0.0320664	0.291166
PVP01_1010900			242.693	2.66774	1.24554	2.14184	0.0322067	0.291301
PVP01_1330800			5.04282	-4.01806	1.87556	-2.14233	0.0321671	0.291301
PVP01_0810500			38.3496	3.56583	1.66665	2.13952	0.0323939	0.291983
PVP01_0730800			360.224	-2.49972	1.16845	-2.13935	0.0324077	0.291983
PVP01_0706400			15.2716	3.68169	1.72687	2.132	0.0330069	0.295663
PVP01_0417900			137.183	-2.67209	1.25328	-2.13208	0.0330003	0.295663
PVP01_1030900			7.00996	-6.04324	2.83376	-2.13259	0.0329583	0.295663
PVP01_0004110			4.32077	5.27309	2.47922	2.12691	0.0334274	0.29714
PVP01_0005160			4.32077	5.27309	2.47922	2.12691	0.0334274	0.29714
PVP01_0121700			4.32077	5.27309	2.47922	2.12691	0.0334274	0.29714
PVP01_1433300			37.0114	3.7753	1.77376	2.12842	0.0333026	0.29714
PVP01_1329900			52.9807	-3.05434	1.44185	-2.11835	0.0341454	0.302942
PVP01_1332200			23.3599	3.43418	1.62416	2.11443	0.0344784	0.305315
PVP01_1206400			465.491	2.59943	1.2312	2.1113	0.0347465	0.307104
PVP01_1240000			87.8069	2.48123	1.17719	2.10775	0.0350526	0.309072
PVP01_0832100			233.535	-2.39115	1.13476	-2.10718	0.0351022	0.309072
PVP01_0313000			36.4631	-2.9207	1.38832	-2.10376	0.0353995	0.3111
PVP01_0619400			5.69046	3.83286	1.82554	2.09958	0.0357656	0.313134
PVP01_0216800			88.7359	3.74301	1.78235	2.10005	0.0357247	0.313134
PVP01_1335600			5.84847	3.72043	1.77386	2.09736	0.0359614	0.314256
PVP01_0000960			6.18405	5.80197	2.77166	2.09332	0.0363208	0.316802
PVP01_1457500			19.1092	4.0509	1.93854	2.08967	0.0366478	0.319056
PVP01_1435900			5.64491	5.82075	2.78983	2.08642	0.0369406	0.321003
PVP01_0415100			49.9811	2.58522	1.24131	2.08265	0.0372832	0.323376
PVP01_1137700			5.52606	5.7924	2.78596	2.07914	0.0376046	0.324864
PVP01_0533100			131.213	3.94222	1.89641	2.07878	0.0376372	0.324864
PVP01_0414200			44.8695	2.79805	1.34619	2.07849	0.0376643	0.324864
PVP01_1419800			7.98961	3.74619	1.80443	2.0761	0.0378844	0.326004
PVP01_1442700			125.535	-2.82109	1.35971	-2.07478	0.038007	0.326004
PVP01_1027300			59.9005	-2.92598	1.40985	-2.07538	0.0379514	0.326004
PVP01_1339300			503.03	2.4937	1.2032	2.07257	0.0382128	0.326565
PVP01_1315100			22.6474	-3.43815	1.65863	-2.07288	0.038183	0.326565
PVP01_0709600			29.349	2.74761	1.32697	2.07058	0.0383979	0.327545
PVP01_1203200			75.0367	3.21156	1.55193	2.0694	0.0385087	0.327888
PVP01_1029700			5.5865	4.91497	2.37635	2.06829	0.038613	0.328175
PVP01_1005000			9.69792	3.58318	1.73445	2.06589	0.0388388	0.329492
PVP01_0943400			5.61079	3.65363	1.77048	2.06364	0.0390518	0.329495
PVP01_0516200			44.8	3.55302	1.72062	2.06496	0.0389267	0.329495
PVP01_1134800			65.5161	2.65801	1.28767	2.06421	0.0389976	0.329495
PVP01_0728500			111.309	2.81867	1.36662	2.06252	0.0391586	0.329797
PVP01_0110000			53.2757	2.68507	1.30387	2.0593	0.039465	0.331777
PVP01_0940200			20.8003	3.67146	1.78354	2.05853	0.0395392	0.331801
PVP01_0319000			96.3614	2.40048	1.16748	2.05613	0.0397702	0.333138
PVP01_0622600			5.55137	3.63634	1.7697	2.05477	0.0399008	0.333631
PVP01_1023300			5.11012	5.68847	2.77184	2.05223	0.0401469	0.334311
PVP01_1307200			85.9571	2.76596	1.34802	2.05186	0.0401831	0.334311
PVP01_1031400			11.4361	-4.53517	2.21043	-2.05171	0.0401978	0.334311
PVP01_0705000			12.2361	3.95095	1.92701	2.0503	0.0403348	0.334851
PVP01_1269000			3.76675	3.69439	1.80427	2.04758	0.0406013	0.336463
PVP01_1219100			17.196	3.40352	1.66884	2.03945	0.0414048	0.34251
PVP01_1109900			4.87244	5.62545	2.76332	2.03576	0.0417746	0.344344
PVP01_0116200			50.0703	3.75224	1.84296	2.03598	0.0417525	0.344344
PVP01_0314500			9.83366	3.72741	1.83427	2.0321	0.0421439	0.346161
PVP01_1201800			12.2179	3.55387	1.74867	2.03232	0.0421213	0.346161
PVP01_1422600			8.08315	4.89083	2.4108	2.02871	0.0424875	0.348277
PVP01_1121100			24.0535	3.44344	1.69788	2.02809	0.0425514	0.348277
PVP01_0120400			4.7536	5.59286	2.75893	2.02718	0.0426435	0.348418
PVP01_1033500			7.90489	4.86005	2.40672	2.01936	0.0434495	0.35376
PVP01_0311400			90.195	-2.73658	1.35504	-2.01956	0.0434288	0.35376
PVP01_0805800			18.3831	2.88642	1.43274	2.01462	0.043945	0.357168
PVP01_1325400			17.4941	3.36278	1.67009	2.01353	0.0440586	0.357467
PVP01_1306400			4.51592	5.52531	2.74987	2.0093	0.0445052	0.359834
PVP01_1203500			21.1377	3.37687	1.6806	2.00933	0.0445023	0.359834
PVP01_0502900			3.64791	3.63301	1.80978	2.00743	0.0447039	0.360814
PVP01_1239500			10.2024	-3.65543	1.82282	-2.00537	0.0449234	0.361957
PVP01_0010510			12.2493	6.76216	3.39037	1.99452	0.046095	0.363684
PVP01_0403500			12.2493	6.76216	3.39037	1.99452	0.046095	0.363684
PVP01_0805700			7.54837	4.79644	2.39829	1.99994	0.0455065	0.363684
PVP01_1454600			11.6183	3.71679	1.8615	1.99667	0.0458616	0.363684
PVP01_0321000			8.2104	3.64528	1.82742	1.99476	0.0460688	0.363684
PVP01_0607300			14.9171	3.45595	1.7329	1.99432	0.0461175	0.363684
PVP01_0919400			17.9282	3.31302	1.6584	1.99771	0.0457476	0.363684
PVP01_0919500			50.6239	2.88167	1.44284	1.99722	0.0458011	0.363684
PVP01_1107700			43.6709	2.69427	1.34968	1.99623	0.0459088	0.363684
PVP01_1107600			708.634	2.65736	1.3313	1.99606	0.0459273	0.363684
PVP01_1120200			148.032	2.48656	1.24257	2.00115	0.0453761	0.363684
PVP01_0207300			194.18	2.40008	1.19864	2.00233	0.0452492	0.363684
PVP01_1251300			32.0668	-3.59084	1.80085	-1.99398	0.0461547	0.363684
PVP01_1032700			15.96	3.77504	1.90128	1.98552	0.0470863	0.369147
PVP01_1023900			1191.1	-2.42869	1.22276	-1.98624	0.0470064	0.369147
PVP01_1108100			139	-2.46163	1.2397	-1.98566	0.047071	0.369147
PVP01_1101200			19.5717	2.92583	1.47446	1.98434	0.0472175	0.369552
PVP01_0516700			81.4986	2.67182	1.3493	1.98016	0.0476858	0.370729
PVP01_0504300			56.1815	2.61413	1.32017	1.98015	0.0476868	0.370729
PVP01_1207100			67.8298	2.51961	1.27128	1.98195	0.0474851	0.370729
PVP01_0417500			56.7368	-2.53097	1.27747	-1.98124	0.0475649	0.370729
PVP01_0714200			12.7794	4.90516	2.47946	1.97831	0.0478932	0.371712
PVP01_1017500			96.2322	2.88504	1.45891	1.97753	0.0479817	0.371779
PVP01_1442400			224.096	2.67707	1.35631	1.97378	0.0484067	0.374447
PVP01_0604400			26.8098	3.6203	1.83642	1.9714	0.0486787	0.375926
PVP01_0528200			39.8775	3.28413	1.66836	1.96848	0.0490124	0.37725
PVP01_0830000			668.896	2.69295	1.36762	1.96908	0.0489443	0.37725
PVP01_1251800			3.98114	5.36029	2.72802	1.9649	0.0494254	0.378548
PVP01_1327200			51.8794	2.77742	1.41259	1.96619	0.0492762	0.378548
PVP01_0519800			67.9117	-2.58085	1.31339	-1.96503	0.0494112	0.378548
PVP01_0717900			66.9704	-2.38096	1.21424	-1.96087	0.0498937	0.380317
PVP01_1268900			113.582	-2.41808	1.23321	-1.96081	0.0499018	0.380317
PVP01_1261900			49.8862	-2.42793	1.23755	-1.96188	0.0497759	0.380317
PVP01_0800900			24.2419	2.63546	1.3462	1.95771	0.0502644	0.381206
PVP01_1330100			30721.4	2.20067	1.12388	1.9581	0.0502177	0.381206
PVP01_1307500			29.911	-3.66552	1.87226	-1.9578	0.0502532	0.381206
PVP01_0905600			11.7233	3.28266	1.67963	1.9544	0.0506544	0.383538
PVP01_1427200			6.78128	4.08284	2.0901	1.95342	0.0507702	0.38379
PVP01_1251600			10.6081	3.57662	1.84429	1.9393	0.0524654	0.39596
PVP01_1003500			7.2737	-3.32268	1.7153	-1.93708	0.0527356	0.397355
PVP01_0115800			520.177	2.3338	1.20629	1.93469	0.0530279	0.398768
PVP01_0532800			11.9612	-4.79164	2.47739	-1.93415	0.0530948	0.398768
PVP01_0729500			3.62462	5.23841	2.71208	1.93151	0.0534199	0.400452
PVP01_0833500			20.474	-2.98542	1.54666	-1.93024	0.0535773	0.400452
PVP01_0710100			22.3961	-3.26177	1.68967	-1.93042	0.0535547	0.400452
PVP01_0524700			14.78	3.20183	1.65978	1.92907	0.0537228	0.400894
PVP01_1412500			52.4166	-2.38818	1.24097	-1.92444	0.0542992	0.404546
PVP01_1413700			280.601	2.59297	1.34931	1.9217	0.0546439	0.406463
PVP01_1246700			6.00668	-3.38167	1.76315	-1.91797	0.055115	0.409313
PVP01_1253400			90.7213	-2.44839	1.2781	-1.91564	0.0554109	0.410853
PVP01_1214900			28.4825	2.54968	1.33166	1.91466	0.0555353	0.41112
PVP01_0821000			26.5027	2.45335	1.28269	1.91265	0.0557923	0.412366
PVP01_1205300			235.29	-2.39075	1.25283	-1.90828	0.0563552	0.415866
PVP01_0007660			4.14251	5.18742	2.72405	1.9043	0.0568706	0.418341
PVP01_1441000			22.2691	3.32534	1.7459	1.90466	0.0568245	0.418341
PVP01_1252200			9.03392	4.2124	2.21737	1.89973	0.0574685	0.420661
PVP01_1257700			84.979	2.23013	1.17361	1.90024	0.0574016	0.420661
PVP01_0734800			115.029	-2.94247	1.54771	-1.90117	0.0572797	0.420661
PVP01_0514600			11.602	-3.1802	1.67517	-1.89844	0.0576384	0.420661
PVP01_0606000			14.5355	-3.18042	1.67504	-1.89871	0.0576024	0.420661
PVP01_0304300			15.2217	-3.14696	1.66149	-1.89406	0.0582175	0.424221
PVP01_0119900			5.88461	4.45548	2.35328	1.89331	0.0583165	0.424278
PVP01_1233000			62.3177	2.83218	1.49673	1.89224	0.0584592	0.424651
PVP01_0818800			15.9219	-3.60239	1.90577	-1.89026	0.0587236	0.425907
PVP01_1450100			43.841	-2.37516	1.25894	-1.88664	0.0592087	0.428089
PVP01_1319700			36.9736	-2.41772	1.2814	-1.88678	0.0591903	0.428089
PVP01_1323900			85.0675	-2.43334	1.29211	-1.88323	0.0596692	0.430206
PVP01_1333300			44.9614	-2.43772	1.29452	-1.8831	0.0596865	0.430206
PVP01_0106800			6.14759	3.33249	1.77042	1.88231	0.0597933	0.430308
PVP01_0109300			50.7519	2.84526	1.51719	1.87535	0.0607441	0.436475
PVP01_1142900			391.396	2.16362	1.15453	1.87402	0.0609277	0.437118
PVP01_1017700			18.7351	-3.14021	1.67785	-1.87157	0.0612659	0.438868
PVP01_1307700			3.8866	3.3345	1.78378	1.86934	0.061575	0.440403
PVP01_1003900			68.3402	2.37501	1.27305	1.86561	0.0620956	0.443445
PVP01_0917400			119.811	2.18997	1.17449	1.8646	0.0622371	0.443774
PVP01_0525800			96.5383	-2.29292	1.23215	-1.86091	0.0627569	0.446795
PVP01_1437500			5.96933	3.28438	1.76767	1.85803	0.0631648	0.449011
PVP01_1114600			13.5066	2.60295	1.40253	1.8559	0.0634677	0.449104
PVP01_0604800			161.248	-2.33764	1.25929	-1.85632	0.0634082	0.449104
PVP01_1401400			110.972	-3.4728	1.87017	-1.85694	0.0633192	0.449104
PVP01_1124400			19.6771	4.7034	2.54615	1.84726	0.0647101	0.451708
PVP01_0410500			19.8229	3.11661	1.68444	1.85024	0.0642792	0.451708
PVP01_0715300			11.2489	3.1125	1.68112	1.85144	0.0641067	0.451708
PVP01_1313900			272.329	2.6606	1.43813	1.85003	0.0643085	0.451708
PVP01_1266900			153.296	-2.34992	1.26954	-1.85099	0.0641707	0.451708
PVP01_0914100			102.158	-2.4573	1.32996	-1.84766	0.0646521	0.451708
PVP01_0110700			20.0868	-2.46911	1.33597	-1.84818	0.064577	0.451708
PVP01_1015600			104.463	-2.52373	1.36477	-1.84921	0.0644281	0.451708
PVP01_1327000			6.59632	-3.73863	2.0229	-1.84816	0.0645793	0.451708
PVP01_1232000			28.5358	-3.06943	1.66686	-1.84144	0.0655567	0.456931
PVP01_0909100			9.284	3.23685	1.75866	1.84052	0.0656926	0.456961
PVP01_0909900			274.513	2.31925	1.26041	1.84007	0.0657576	0.456961
PVP01_1244200			7.39743	3.28289	1.78809	1.83598	0.0663611	0.460467
PVP01_1201300			5.11215	4.26451	2.32865	1.83132	0.0670528	0.461187
PVP01_1469400			17.2382	3.18437	1.74267	1.8273	0.0676553	0.461187
PVP01_1332600			12.835	3.1152	1.6986	1.83399	0.0666559	0.461187
PVP01_0808500			24.1856	2.95615	1.61761	1.82748	0.0676269	0.461187
PVP01_0421300			156.858	2.39817	1.31051	1.82995	0.0672577	0.461187
PVP01_0207200			115.414	-2.32095	1.26944	-1.82833	0.0675008	0.461187
PVP01_1115800			34.4808	-2.43791	1.33289	-1.82903	0.0673949	0.461187
PVP01_1219300			27.7815	-3.03682	1.66099	-1.82832	0.0675021	0.461187
PVP01_1129100			17.7149	-3.06715	1.67523	-1.83089	0.0671173	0.461187
PVP01_0306900			4.68605	-3.25186	1.77367	-1.83341	0.0667421	0.461187
PVP01_0623800			5.22209	-3.37588	1.84231	-1.83242	0.0668892	0.461187
PVP01_0934100			5.31588	-4.28759	2.34388	-1.82927	0.0673598	0.461187
PVP01_1414100			4.36297	3.22506	1.76608	1.82611	0.0678341	0.461729
PVP01_0113700			138.596	-2.16782	1.18758	-1.82541	0.067939	0.461767
PVP01_1008700			69.5739	-2.49958	1.37264	-1.821	0.0686071	0.465481
PVP01_1235900			18.6425	-2.99796	1.6468	-1.82048	0.0686857	0.465481
PVP01_1214800			5.16848	-3.1776	1.74672	-1.81918	0.0688847	0.46615
PVP01_1305200			12.6625	4.48555	2.47093	1.81533	0.0694737	0.468144
PVP01_1430300			24.0491	3.29913	1.81743	1.81528	0.0694815	0.468144
PVP01_1242200			36.1139	2.59154	1.42685	1.81626	0.0693306	0.468144
PVP01_0517400			43.8459	2.89676	1.59677	1.81414	0.0696567	0.468646
PVP01_1337400			11.3688	3.03578	1.67479	1.81264	0.069888	0.469522
PVP01_0807500			25.8202	2.34182	1.2928	1.81143	0.0700741	0.470093
PVP01_0820600			47.7978	-2.71785	1.50207	-1.80939	0.0703897	0.47153
PVP01_0949200			4.81505	4.1836	2.31844	1.80449	0.0711548	0.473246
PVP01_0922400			41.396	2.91056	1.61169	1.80591	0.070933	0.473246
PVP01_0603600			29.1141	2.5317	1.40297	1.80453	0.071149	0.473246
PVP01_1407600			74.0966	2.32738	1.28901	1.80555	0.0709882	0.473246
PVP01_0604900			274.806	-2.06844	1.14531	-1.80601	0.0709176	0.473246
PVP01_0909600			9.04632	3.19349	1.77328	1.8009	0.0717188	0.475636
PVP01_1006900			23.8907	-3.0715	1.70518	-1.80128	0.0716586	0.475636
PVP01_1229200			793.924	-2.01864	1.1214	-1.8001	0.0718449	0.475793
PVP01_0941200			75.7071	2.10931	1.17398	1.79671	0.072381	0.478662
PVP01_0908300			3.77738	3.52461	1.96683	1.79202	0.073129	0.479425
PVP01_1209700			41.9752	3.13202	1.74518	1.79468	0.0727054	0.479425
PVP01_0518400			28.5646	2.6143	1.45983	1.79082	0.0733214	0.479425
PVP01_1206800			33.939	2.57646	1.43775	1.79201	0.0731316	0.479425
PVP01_0527600			54.008	2.29461	1.27949	1.79338	0.0729128	0.479425
PVP01_0409900			120.854	2.25696	1.25858	1.79326	0.0729306	0.479425
PVP01_1323700			21.3587	-3.15809	1.76346	-1.79085	0.0733181	0.479425
PVP01_1414400			43.8417	-3.20252	1.78467	-1.79446	0.0727394	0.479425
PVP01_0818500			382.594	-2.04314	1.1422	-1.78878	0.0736502	0.480899
PVP01_0942200			15.9186	2.58863	1.44843	1.7872	0.0739052	0.481212
PVP01_1312900			116.837	-2.36332	1.32219	-1.78743	0.0738678	0.481212
PVP01_1319600			138.61	-2.25761	1.26369	-1.78653	0.0740139	0.481246
PVP01_0203500			7.06218	3.09475	1.73443	1.78431	0.0743737	0.482236
PVP01_1469500			1136.78	2.4564	1.37663	1.78436	0.0743645	0.482236
PVP01_1421800			29.4127	4.16636	2.34199	1.77898	0.0752423	0.487189
PVP01_1269100			33.8194	2.50349	1.4104	1.77502	0.0758944	0.490728
PVP01_1259600			25.8435	2.26991	1.28001	1.77336	0.0761696	0.491823
PVP01_0114900			33.8197	2.50738	1.41788	1.7684	0.0769938	0.496455
PVP01_1345600			173.512	2.49308	1.4117	1.76601	0.0773936	0.498342
PVP01_0718300			367.733	-2.02554	1.14777	-1.76476	0.0776043	0.499008
PVP01_0806100			6.02976	3.11392	1.76632	1.76295	0.0779098	0.499376
PVP01_0614100			33.3936	2.62182	1.48681	1.76338	0.0778358	0.499376
PVP01_1318500			37.8328	-2.29568	1.30297	-1.76188	0.0780896	0.499376
PVP01_1308200			30.1917	-2.96221	1.68129	-1.76187	0.0780913	0.499376
PVP01_0606100			212.886	-2.25482	1.28046	-1.76095	0.0782461	0.499679
PVP01_1113300			268.482	2.17422	1.23756	1.75685	0.0789428	0.503072
PVP01_1247500			13.9638	-2.53664	1.4441	-1.75655	0.0789938	0.503072
PVP01_1448900			43.1887	-2.18263	1.24411	-1.75437	0.0793677	0.504761
PVP01_1314400			28.0845	2.2467	1.28223	1.75218	0.0797425	0.506452
PVP01_1448300			93.4608	2.21087	1.26523	1.74742	0.0805652	0.510979
PVP01_API02200			4.06587	3.09517	1.77205	1.74666	0.080696	0.511112
PVP01_1252500			4.22085	4.00646	2.29668	1.74446	0.0810792	0.512659
PVP01_1229900			21.037	-2.87429	1.64811	-1.74399	0.0811609	0.512659
PVP01_1015000			29.5988	2.77967	1.59467	1.7431	0.0813161	0.512943
PVP01_1457000			14.1478	2.77649	1.59484	1.74092	0.0816982	0.513958
PVP01_0919200			15.5657	-2.56693	1.47446	-1.74093	0.081695	0.513958
PVP01_1104500			27.3674	2.58651	1.48667	1.7398	0.0818947	0.514498
PVP01_1318600			39.2729	2.18234	1.25581	1.7378	0.0822462	0.515313
PVP01_0410800			151.151	-2.12696	1.22365	-1.73821	0.0821738	0.515313
PVP01_0945500			52.2667	2.63765	1.51911	1.73631	0.0825086	0.516262
PVP01_1208800			13.8249	3.21344	1.85316	1.73403	0.0829119	0.517574
PVP01_0215100			61.1341	2.80279	1.61649	1.73387	0.082941	0.517574
PVP01_1127500			10.731	3.15453	1.82178	1.73157	0.0833506	0.517768
PVP01_API04900			6.34812	3.06713	1.77077	1.73209	0.0832569	0.517768
PVP01_0206500			151.406	1.97827	1.14288	1.73096	0.0834595	0.517768
PVP01_1011500			687.711	-1.99178	1.15094	-1.73057	0.083529	0.517768
PVP01_1311400			10.83	-2.92916	1.69235	-1.73082	0.0834839	0.517768
PVP01_0708000			88.258	2.49146	1.44075	1.72927	0.0837604	0.518512
PVP01_1204800			8.79922	4.14794	2.4061	1.72393	0.0847207	0.521678
PVP01_0714500			18.7149	2.85019	1.65182	1.72549	0.0844401	0.521678
PVP01_0825300			17.4329	-2.8372	1.64566	-1.72405	0.084699	0.521678
PVP01_0415200			56.6568	-3.13518	1.81831	-1.72423	0.0846664	0.521678
PVP01_1449500			7.19387	4.08739	2.37257	1.72277	0.08493	0.522275
PVP01_1442000			5.87175	3.11107	1.81067	1.71819	0.0857624	0.525782
PVP01_0806900			94.9507	-2.13579	1.24353	-1.71753	0.085883	0.525782
PVP01_0112600			71.2498	-2.38993	1.39181	-1.71714	0.0859528	0.525782
PVP01_0724900			85.072	-2.49358	1.45097	-1.71856	0.0856941	0.525782
PVP01_1216900			29.5078	2.31549	1.34906	1.71637	0.0860951	0.525961
PVP01_0620200			3.90828	-3.03475	1.76885	-1.71567	0.0862231	0.526052
PVP01_0309900			23.4665	2.33225	1.35989	1.71503	0.0863399	0.526074
PVP01_1434100			32.0368	2.17671	1.27042	1.71338	0.0866425	0.527227
PVP01_1213000			15.9347	4.27683	2.50576	1.7068	0.0878589	0.532537
PVP01_0703500			153.599	-2.59689	1.52103	-1.70732	0.0877625	0.532537
PVP01_0513300			55.8447	-3.05812	1.79046	-1.70801	0.0876351	0.532537
PVP01_1306000			63.8352	2.09329	1.22697	1.70607	0.0879953	0.532669
PVP01_0000170			22.0333	2.46911	1.4479	1.70531	0.0881369	0.532833
PVP01_0721900			106.883	3.20185	1.8816	1.70167	0.088818	0.536253
PVP01_1205800			6.83735	4.01554	2.36319	1.69921	0.0892802	0.53636
[truncated: 4,847 more rows]

## Sheet: 2vs3
Gene ID	Gene Name	Product Description	baseMean	log2FoldChange	lfcSE	stat	pvalue	padj
[truncated: 5,754 more rows]

[truncated: 2 more sheets: 2vs4, 3vs4]
